# Supplementary material for: Insights Into Volcanic Unrest by Correlating Petrological and Seismic Observations at Kizimen (Kamchatka, Russia)
Source: Research Square preprint supplement (doi:10.21203/rs.3.rs-1140681/v1), 2022-03-10
Supplement: Supplementary file 3 [file f9ee0310ae23364664033231.xlsx]

## Sheet: Unzoned opx Andesites
Sample	Crystal	Area	Na2O	MgO	SiO2	Al2O3	CaO	P2O5	K2O	TiO2	FeO	MnO	Cr2O3	NiO	Total	En (%)	Mg#
K9 355	K9_L9C8	Unzoned	0.033025	21.9411	51.8778	0.770875	0.673575	-0.02355	0.007925	0.1217	21.9089	1.22782	0.007175	0.011525	98.6175	63.1973	0.628113
K9 355	K9_L9C13	Unzoned	0.006475	22.0506	53.0478	0.707375	0.72545	-0.0157	-0.01485	0.0779	22.2317	1.20267	0.02055	-0.022275	100.077	62.9185	0.62629
K9 355	K9_L9C23	Unzoned	0.023575	22.1359	52.8409	0.671125	0.61945	0.005225	0.00645	0.10385	22.1586	1.22845	0.01715	0.00615	99.8368	63.2205	0.627675
K9 355	K9_L11C15	Unzoned	0.01975	21.9293	52.8942	0.7028	0.65345	0	0.013325	0.11185	22.4591	1.24182	0.01415	0.006125	100.064	62.6584	0.622384
K9 355	K9_L12C8	Unzoned	0.01585	22.0967	52.7131	0.730125	0.7241	-0.01175	0.0005	0.120775	22.0082	1.18907	-0.006175	-0.00615	99.6372	63.1981	0.629195
K5 355	K5_L2C14	Unzoned	0.030775	21.7127	52.2936	0.740575	0.73095	0.024375	0.014	0.13745	21.4245	1.17	-0.006675	0.005425	98.3122	63.3819	0.631251
K5 355	K5_L3C12	Unzoned	0.01465	21.6242	52.7558	0.613225	0.6534	0.018975	0.004675	0.08975	21.8164	1.18708	0.0105	0.0031	98.8204	62.9815	0.626081
K5 355	K5_L3C20	Unzoned	0.01815	21.7645	52.791	0.561225	0.7266	-0.020325	0.0109	0.080825	21.6002	1.20165	-0.0097	-0.0039	98.769	63.2594	0.629652
K5 355	K5_L4C19	Unzoned	0.01295	21.6191	52.585	0.68295	0.6969	-0.013575	-0.00155	0.136825	21.7915	1.174	0.003175	-0.000775	98.7221	62.9468	0.626434
K5 355	K5_L5C1	Unzoned	0.0286	21.709	52.2857	0.7386	0.703033	0.0018	-0.00276667	0.0820333	21.7052	1.245	-0.0178333	-0.0165667	98.5015	63.1244	0.470667
K5 355	K5_L5C3	Unzoned	0.007325	21.7486	53.2026	0.661775	0.671175	0.016275	-0.0021	0.09755	21.4928	1.18752	0.025075	0.00465	99.1482	63.4275	0.630738
K5 355	K5_L5C13	Unzoned	0.011725	21.7839	53.0395	0.553075	0.520325	0.0095	0.01505	0.047	21.5535	1.23265	-0.0099	0.014725	98.8097	63.6027	0.630021
K5 355	K5_L5C21	Unzoned	0.0141	21.6629	53.245	0.657925	0.657375	0.008125	-0.007275	0.0878	21.5742	1.18847	-0.014375	-0.023275	99.1112	63.265	0.628929
K5 355	K5_L5C22	Unzoned	0.010875	21.4764	52.8716	0.734475	0.810875	-0.00815	-0.00675	0.10845	21.9485	1.23457	-0.00175	-0.0078	99.2287	62.4789	0.622627
K8 355	K8_L7C9	Unzoned	0.01235	21.3982	52.9449	0.65475	0.780675	0.082575	-0.002075	0.09265	21.7198	1.22228	0.0011	-0.024875	98.9479	62.6677	0.62424
K8 355	K8_L7C16	Unzoned	0.010875	21.7	52.6514	0.807	0.5912	-0.012225	0.001575	0.1182	21.7362	1.21358	-0.00575	-0.019375	98.8628	63.2273	0.627438
K8 355	K8_L7C17	Unzoned	0.027625	21.7199	52.6389	0.7677	0.585375	-0.0027	-0.0031	0.087075	21.7522	1.25095	0.01085	0.016325	98.8979	63.2399	0.627106
K8 355	K8_L8C11	Unzoned	0.025575	21.565	52.5716	0.8197	0.61735	0.00815	-0.000525	0.085075	21.7796	1.23917	-0.00225	-0.02485	98.7364	63.004	0.625286
K8 355	K8_L8C12	Unzoned	0.0211	21.9569	52.7147	0.686225	0.520575	0.008125	0.011975	0.103825	21.5797	1.19565	0.01275	-0.02255	98.8282	63.7579	0.631978
K8 355	K8_L9C6	Unzoned	0.01615	21.5648	53.0992	0.5441	0.745225	0.00135	-0.001025	0.094125	21.4732	1.2635	-0.01105	-0.008525	98.841	63.1525	0.628183
K8 355	K8_L11C3	Unzoned	0.0446	21.6609	52.7827	0.6877	0.746775	0.013575	-0.0005	0.14115	21.6614	1.20588	-0.0008	0.006225	98.9829	63.0605	0.627896
K8 355	K8_L11C12	Unzoned	0.0156	21.4748	52.9583	0.500025	0.689475	0.008125	0.002575	0.0858	21.5038	1.24483	0.00545	-0.046575	98.5208	63.0951	0.627048
K5 500	K5_L1C2	Unzoned	0.03325	21.3181	52.6461	0.956325	0.6406	-0.0068	-0.004175	0.0857	21.8199	1.25035	0.009725	-0.00855	98.7799	62.6644	0.622079
K5 500	K5_L2C8	Unzoned	0.01565	21.143	52.4742	0.811125	0.572925	0	0.018175	0.05115	22.0578	1.31593	-0.005275	0.009325	98.4918	62.3125	0.617036
K5 500	K5_L2C14	Unzoned	0.01645	21.6005	53.2377	0.61775	0.6632	-0.00815	0.01145	0.04495	21.5317	1.2485	-0.014675	0.045075	99.0427	63.2344	0.628067
K5 500	K5_L3C1	Unzoned	0.006475	21.529	52.8944	0.563975	0.701625	0.01625	-0.0005	0.079525	21.8173	1.28747	0.0134	0.0365	98.9536	62.8045	0.623909
K5 355	K5_L2C13	Unzoned	0.0204971	21.7537	52.7751	0.603003	0.600332	0.0117765	-6.47059e-05	0.0802853	21.8253	1.21448	0.00130882	0.00337353	98.9306	63.1842	0.627132
K5 500	K5_L3C13	Unzoned	0.02755	22.5618	53.5913	0.5708	0.660525	-0.012575	-0.015225	0.093875	22.5099	1.27185	0.00485	0	101.322	63.2602	0.628238
K5 500	K5_L3C18	Unzoned	0.0175667	22.6832	53.5699	0.780533	0.6647	0.00933333	0.00406667	0.114	22.5801	1.22887	0.0154667	-0.0171	101.68	63.3109	0.629235
K5 500	K5_L4C11	Unzoned	0.028125	22.5125	53.6766	0.65985	0.756	-0.001375	0.008075	0.104425	22.5022	1.23705	0.0178	0.015275	101.529	63.0967	0.628154
K5 500	K5_L4C2	Unzoned	0.0036	22.7989	53.8528	0.69445	0.56895	0.002775	0	0.081975	22.4062	1.36058	0.023175	0.00405	101.828	63.7197	0.630779
K5 500	K5_L5C5	Unzoned	0.0195	22.2623	53.5275	0.937125	0.5775	0.001425	0.0116	0.106325	22.8012	1.27567	0.000875	0.0056	101.543	62.7644	0.622209
K5 500	K5_L5C16	Unzoned	0.021225	22.5539	53.4663	0.5501	0.743525	-2.5e-05	0.0135	0.061625	22.4431	1.3174	0.0173	0.00395	101.21	63.2113	0.628339
K8 500	K8_L6C13	Unzoned	0.0347	22.4413	53.2707	0.8144	0.664633	-0.0055	-0.0166667	0.0987667	22.4193	1.20023	0.0116	0.0697333	101.038	63.221	0.628598
K8 500	K8_L7C1	Unzoned	0.018275	22.5872	53.5496	0.618925	0.645575	0.020675	0.0205	0.074725	22.4033	1.2591	0.003275	-0.022975	101.216	63.4129	0.629686
K8 500	K8_L7C5	Unzoned	0.025675	22.3802	53.258	0.608175	0.6658	-0.008275	-0.0055	0.09965	22.0794	1.22305	0.011125	0.011075	100.372	63.5002	0.631126
K8 500	K8_L7C13	Unzoned	0.013	22.3447	52.7428	1.13253	0.848	0.0138	0.012475	0.177125	22.3851	1.23658	0.01725	0.0222	100.963	62.921	0.62756
K8 500	K8_L7C16	Unzoned	0.026575	22.6266	53.1379	0.965925	0.6792	0.0207	-0.001	0.1287	22.3851	1.19898	-0.013125	-0.0182	101.197	63.4245	0.630829
K8 500	K8_L7C17	Unzoned	0.00903333	22.5247	53.6578	0.434933	0.7201	0.0128333	-0.004	0.071	22.4478	1.1522	0.0105	0.0569667	101.114	63.2094	0.629668
K8 500	K8_L8C11	Unzoned	0.025725	22.3808	53.2802	0.93115	0.8395	0.011	-0.000975	0.18665	22.5831	1.25415	0.004425	0.0166	101.538	62.7733	0.625817
K8 500	K8_L9C10	Unzoned	0.015625	22.538	53.7193	0.580475	0.66715	0.033075	0.016975	0.071925	22.3442	1.27553	-0.006175	0.0214	101.298	63.3874	0.629532
K9 355	K9_L8C4	Unzoned	0.0173667	22.5792	52.7582	0.746567	0.677067	0.0206	0.00296667	0.0791	22.1652	1.18147	0.00483333	-0.0490667	100.241	63.6027	0.632737
K9 355	K9_L8C5	Unzoned	0.010225	22.1773	52.9578	0.7035	0.677875	0.0056	-0.000575	0.106025	22.3949	1.3088	0.009875	-0.02255	100.371	62.9493	0.624947
K9 355	K9_L8C7	Unzoned	0.0178333	22.3473	52.6673	0.740067	0.619267	-0.00376667	-0.00806667	0.102367	22.3162	1.2418	0.0117667	0.0222667	100.092	63.284	0.628207
K9 355	K9_L9C18	Unzoned	-0.00216667	22.0752	53.0198	0.648933	0.6891	-0.0056	0.0168667	0.104967	22.443	1.19403	-0.00406667	0.0012	100.217	62.7789	0.624537
K9 355	K9_L10C11	Unzoned	0.00625	22.3775	52.9378	0.7288	0.547925	-0.008275	-0.00055	0.137275	22.1531	1.254	0.015725	-0.04845	100.174	63.5708	0.630004
K9 355	K9_L11C1	Unzoned	0.0046	21.9191	52.9241	0.943867	0.732833	-0.0110333	0.0238667	0.131367	22.5362	1.21673	0.00116667	0.0306667	100.488	62.4674	0.621759
K9 355	K9_L11C14	Unzoned	0.018075	22.1062	53.4146	0.599	0.6099	-0.002725	-0.016175	0.102125	22.417	1.23028	-0.001375	-0.01465	100.534	62.9437	0.624798
K9 355	K9_L12C2	Unzoned	0.014625	22.4222	53.1012	0.718275	0.670525	-0.0014	-0.003225	0.09575	22.2049	1.20918	-0.004925	0.032625	100.495	63.3987	0.630332
K9 355	K9_L12C5	Unzoned	0.0137	22.2017	53.0905	0.725425	0.646775	-0.03425	2.5e-05	0.07275	22.4986	1.31612	0.001225	0.024425	100.615	62.9123	0.62412
K9 500	K9_L6C2	Unzoned	0.00495	22.4005	53.0029	0.67805	0.68375	-0.0216	0.004275	0.127525	22.0785	1.27772	-0.0052	2.5e-05	100.29	63.4962	0.63077
K9 500	K9_L6C12	Unzoned	0.0241667	22.1923	52.7547	0.7336	0.6692	0.0270667	-0.00776667	0.151133	22.3415	1.3243	0.0053	-0.0214333	100.231	63.0343	0.625517
K9 500	K9_L6C15	Unzoned	0.0129	22.1106	52.7041	0.840125	0.53165	-0.0068	0.0085	0.10265	22.4831	1.194	-0.0121	0.00405	100.035	62.9784	0.624512
K9 500	K9_L7C8	Unzoned	0.0227	21.8656	52.5725	0.7264	0.6534	-0.0081	0.007425	0.108175	22.3358	1.1794	0.012775	0.011275	99.5152	62.7072	0.623485
K9 500	K9_L8C7	Unzoned	0.01815	22.0293	52.8958	0.803075	0.794075	0.014825	0.00585	0.120325	22.3921	1.1811	-0.007975	-0.004	100.274	62.6499	0.624714
K9 500	K9_L8C11	Unzoned	0.005225	21.6758	52.6444	0.627975	1.078	0.167875	0.0106	0.1238	22.0507	1.21132	-0.0102	-0.008875	99.629	62.2489	0.624012
K9 500	K9_L8C16	Unzoned	0.00675	21.9476	52.582	0.833875	0.8146	0.0122	0.01485	0.08165	22.4143	1.13857	-0.000675	0.02085	99.8961	62.5124	0.624043
K9 500	K9_L9C6	Unzoned	0.0148	21.8896	52.591	0.69285	0.672925	-0.013525	-0.006925	0.10365	22.3949	1.20535	0.017175	0.032975	99.6295	62.6538	0.622951
K5 250	K5_L1C3	Unzoned	0.02745	21.8698	52.9962	0.684125	0.796875	-0.0254	-0.00275	0.132475	22.8167	1.32125	0.006425	-0.012925	100.671	62.0531	0.617415
K5 250	K5_L1C5	Unzoned	0.0069	22.3001	52.8108	0.721133	0.648133	0	-0.0117333	0.0519	22.5235	1.28413	-0.00373333	0.0287	100.419	62.9919	0.625259
K5 250	K5_L2C1	Unzoned	0.01995	22.028	52.815	0.65625	0.77615	0.001475	-0.00055	0.0614	22.5556	1.22723	-0.008	-0.006875	100.164	62.5087	0.622623
K5 250	K5_L2C1	Unzoned	0.01995	22.028	52.815	0.65625	0.77615	0.001475	-0.00055	0.0614	22.5556	1.22723	-0.008	-0.006875	100.164	62.5087	0.622623
K5 250	K5_L3C8	Unzoned	0.0042	22.0932	53.0423	0.7738	0.684375	0	-0.002175	0.1387	22.5805	1.1803	0.002475	-0.014725	100.536	62.6704	0.623547
K5 125	K5_L2C14	Unzoned	0.003975	22.1875	53.3901	0.5274	0.69365	-0.0046	-0.009625	0.078525	22.8239	1.26178	0.017875	-0.0257	101.014	62.5176	0.621355
K5 125	K5_L3C35	Unzoned	0.010925	22.3383	52.7032	0.617775	0.633725	-0.012325	-0.01135	0.10175	22.5217	1.28437	0.00735	-0.0408	100.246	63.0519	0.625676
K5 125	K5_L4C12	Unzoned	0.020225	22.1632	52.9835	0.695125	0.66745	-0.019975	0.00225	0.068625	22.5771	1.2199	0.012	-0.026625	100.444	62.7694	0.623924
K5 125	K5_L4C23	Unzoned	0.009625	21.8947	52.906	0.71555	0.703975	0.0061	-0.0198	0.117775	22.8149	1.20913	-0.0068	0.030125	100.436	62.2015	0.618833
																	0.617036	min
																	0.632737	max

## Sheet: Opx profiles - compositions (1)
Hybrids
Fraction (µm)	Crystal	Na2O	MgO	SiO2	Al2O3	CaO	P2O5	K2O	TiO2	FeO	MnO	Cr2O3	NiO	Total	Distance from the rim (µm)	En (%)	Mg#
355	K9_L7C4	0.0404	22.6313	52.2268	1.5874	1.4856	-0.0105	0.0259	0.365	19.094	0.7764	0.0086	-0.034	98.2413	0	65.7683	0.669882
355	K9_L7C4	0.0399	23.9371	53.2872	1.5478	1.4986	0.0264	-0.004	0.2136	17.9282	0.7454	-0.016	-0.0279	99.2241	2.24	68.2517	0.695478
355	K9_L7C4	0.0397	24.0785	52.7333	2.3784	1.6563	-0.0158	-0.012	0.325	17.4048	0.6567	-0.004	0.0248	99.2974	4.12	68.7311	0.703729
355	K9_L7C4	0.0507	24.8179	51.4731	2.6923	1.6966	-0.0053	0.038	0.3951	16.7898	0.4364	0.0221	-0.0217	98.412	6.08	69.9958	0.719676
355	K9_L7C4	0.0417	24.4226	52.2201	2.7058	1.7778	-0.0106	0.03	0.242	16.8637	0.5796	-0.0214	0.0031	98.8865	8.06	69.4598	0.713854
355	K9_L7C4	0.0178	21.4293	52.4059	0.6729	0.7975	0	-0.002	0.0548	22.5971	1.2261	0.0281	0	99.2296	10.05	61.7928	0.615736
355	K9_L7C4	0.0321	21.2754	52.1186	0.5788	0.6737	-0.0052	-0.002	0.1013	22.8006	1.1308	0.0091	-0.0123	98.7205	12.04	61.5775	0.612967
355	K9_L7C4	0.0298	21.1745	52.5702	0.5582	0.7368	0.021	0.0238	0.1259	22.9157	1.2133	0.0091	0.0062	99.3844	14.04	61.2695	0.609875
355	K9_L7C4	0.0083	21.0836	52.5328	0.636	0.6905	0.021	0.004	-0.0027	22.8504	1.1901	-0.0248	-0.0154	99.0166	16.04	61.2917	0.609728
355	K9_L7C4	0.0203	21.0815	52.2211	0.6893	0.6586	0.0052	0.0139	0.1697	22.8893	1.1722	0.0059	0.0154	98.9424	18.03	61.2913	0.609499
355	K9_L7C4	0.0215	21.1188	52.0151	0.6781	0.6567	0.0157	0.0238	0.1285	22.8703	1.263	0.015	0.0739	98.8804	20.03	61.3546	0.609199
355	K9_L7C4	0.0012	21.3396	52.3141	0.595	0.7338	-0.0105	0.0238	0.0657	22.7091	1.2933	0.0013	-0.0092	99.0769	22.03	61.6633	0.612959
355	K9_L7C4	0.0345	21.2014	52.6566	0.6969	0.7016	-0.0262	0.0377	0.0712	22.6243	1.3292	-0.0026	0.0246	99.3781	24.03	61.636	0.611896
355	K9_L7C4	0.0036	21.1963	52.0404	0.8002	0.7098	-0.0786	0.006	0.1204	22.725	1.3285	-0.032	-0.0092	98.9301	26.03	61.5188	0.61085
355	K9_L7C4	0.0166	21.2083	52.5803	0.7462	0.7197	-0.0157	-0.0397	0.1533	22.5886	1.1843	-0.0131	-0.0092	99.1974	28.02	61.6563	0.613786
355	K9_L7C4	0.0179	21.3873	52.0264	0.6022	0.7519	0.0262	0.0218	0.093	22.7214	1.2162	0.0281	-0.0739	98.8924	30.02	61.6806	0.614139
355	K9_L7C4	0.0202	21.4137	51.9454	0.6072	0.7528	-0.0105	0.0278	0.0657	22.6337	1.1958	-0.0091	0.0585	98.7208	32.02	61.7962	0.615505
355	K9_L7C4	0.019	21.447	52.5282	0.5996	0.7857	-0.0315	0.0159	0.0685	22.483	1.1523	0.0105	-0.0062	99.1096	34.02	61.9417	0.617811
355	K9_L7C4	0.0226	21.4726	52.4652	0.5237	0.8023	0.021	0.0496	0.1452	22.2929	1.3031	0.0392	-0.0832	99.1373	36.02	62.1396	0.618466
355	K9_L7C4	0.0475	21.6663	52.3195	0.5937	0.8031	0.0682	0.0099	0.0986	22.3834	1.2766	0.0013	-0.0154	99.2682	38.02	62.2587	0.619948
355	K9_L7C4	0.0119	21.5243	52.1708	0.5654	0.7244	-0.0315	-0.0139	0.1013	22.4103	1.332	-0.0287	0.0123	98.8526	40.02	62.1785	0.617572
355	K9_L7C4	0.0071	21.6452	52.3546	0.64	0.7801	-0.0052	-0.0218	0.1397	22.3798	1.3357	-0.0065	0.0031	99.2852	42.02	62.269	0.619159
355	K9_L7C4	0.0048	21.5356	51.9715	0.6768	0.7713	-0.0262	-0.0179	0.0822	22.3831	1.2023	0.019	-0.0863	98.6466	44.02	62.1577	0.619276
355	K9_L7C4	0.038	21.6244	51.9607	0.8494	0.7284	0.021	0.0179	0.1232	22.5508	1.205	0.0118	-0.0308	99.1306	46.02	62.1413	0.618549
355	K9_L7C4	0.0083	21.6687	52.1665	0.607	0.6932	-0.0472	0.002	0.2	22.2884	1.2029	-0.0026	-0.0031	98.837	48.05	62.4988	0.621667
355	K9_L7C4	0.0154	21.7969	52.3907	0.559	0.6916	0.0787	-0.0079	0.0849	22.434	1.179	-0.0059	-0.0031	99.2303	50.05	62.4924	0.621843
355	K9_L7C4	0.0474	21.7757	52.2995	0.594	0.6813	-0.0105	-0.0238	0.0657	22.2592	1.303	-0.0085	0.0616	99.0875	52.05	62.6591	0.622105
355	K9_L7C4	0.0024	21.7545	52.2241	0.6171	0.7514	0.0105	-0.0099	0.0712	22.3094	1.3263	0.0124	-0.0739	99.0794	54.05	62.495	0.62114
355	K9_L7C4	0.019	21.6876	52.2772	0.5689	0.7138	0.0052	0.002	0.1754	22.2331	1.2206	-0.0249	-0.0339	98.9028	56.05	62.5485	0.622246
355	K9_L7C4	-0.0285	21.6862	52.3832	0.6847	0.761	0	0.004	0.0657	22.4316	1.2496	-0.0314	0.0092	99.2753	58.05	62.286	0.619957
355	K9_L7C4	0.0202	21.6956	52.6266	0.6166	0.689	0.0367	0.0457	0.0657	22.3902	1.3973	-0.0124	-0.0401	99.5835	60.05	62.4306	0.618986
355	K9_L7C4	0.0036	21.7373	52.4629	0.7162	0.7065	-0.0262	0	0.0712	22.4158	1.2556	0.0242	0.0247	99.4178	62.05	62.4273	0.620608
355	K9_L7C4	0.0332	21.7341	52.3504	0.7446	0.7176	-0.0052	0.0238	0.1205	22.3448	1.3266	0.0072	-0.0401	99.4028	64.05	62.481	0.620565
355	K9_L7C4	-0.0225	21.7448	52.5454	0.6814	0.7137	0.0262	0.0079	0.1014	22.4263	1.1639	0	-0.0955	99.411	66.05	62.4155	0.621509
355	K9_L7C4	-0.0036	21.708	51.9728	0.7088	0.6811	0.0262	0.004	0.0794	22.3955	1.353	0.0183	-0.0401	98.947	68.05	62.4488	0.619513
355	K9_L7C4	0.0344	21.7083	52.2032	0.6601	0.7821	0.0419	0.0258	0.1643	22.4845	1.2406	-0.0203	0.0216	99.3668	70.04	62.2298	0.619762
355	K9_L7C4	0.0107	21.8799	52.1673	0.7085	0.667	0.021	0.004	0.126	22.2749	1.2085	0.0052	-0.0216	99.0729	72.04	62.7734	0.624024
355	K9_L7C4	0.0237	21.7657	52.2407	0.7349	0.6963	0.021	0	0.1151	22.3089	1.179	0.0144	0.077	99.1766	74.04	62.5788	0.622754
355	K9_L7C4	0.0308	21.788	52.5423	0.7544	0.7049	-0.0525	0.0238	0.1342	22.4907	1.2971	0.0346	-0.0062	99.8008	76.04	62.4088	0.619997
355	K9_L7C4	-0.0047	21.8042	52.4413	0.7841	0.6616	0.0105	-0.0179	0.063	22.2523	1.3034	0.0046	0	99.3251	78.04	62.7223	0.622477
355	K9_L7C4	0.0047	21.7615	52.3499	0.7842	0.6867	0.0052	0.0099	0.0739	22.3793	1.297	0.0235	0.0092	99.3852	80.04	62.5156	0.620816
355	K9_L7C4	0.0273	21.8408	52.0137	0.7649	0.7159	-0.0157	-0.0159	0.1041	22.2606	1.3531	0.0196	0.0031	99.103	82.04	62.6828	0.622287
355	K9_L7C4	0.0178	21.7721	52.4079	0.7328	0.6804	0.0262	0.0159	0.1096	22.3132	1.2292	-0.0353	0.0247	99.3296	84.04	62.6019	0.622273
355	K9_L7C4	0.0024	21.8006	52.1761	0.6949	0.7365	0	0.0258	0.0904	22.2411	1.2408	-0.0216	-0.0339	99.0085	86.04	62.6327	0.623183
355	K9_L7C4	0.0237	21.9624	52.1089	0.7174	0.7334	-0.0052	-0.0179	0.1315	22.4232	1.1758	-0.0373	-0.074	99.2761	88.04	62.6266	0.62376
355	K9_L7C4	0.0107	21.81	52.2366	0.7763	0.687	-0.021	0	0.0932	22.3293	1.1052	0.0078	0.0586	99.1146	90.04	62.6178	0.623775
355	K9_L7C4	0.0213	21.7967	52.2511	0.7428	0.6828	-0.0997	-0.0318	0.0959	22.2797	1.2882	0.034	0.0216	99.2141	92.04	62.659	0.622276
355	K9_L7C4	0.0178	21.8655	52.4787	0.8951	0.7074	0.0157	0.0079	0.1452	22.3365	1.182	0.0124	0.0493	99.7136	94.07	62.6437	0.623523
355	K9_L7C4	0.0332	21.723	52.2476	1.0924	0.719	0.042	0	0.1342	22.5128	1.2644	-0.0157	-0.0308	99.7687	96.07	62.2984	0.619402
355	K9_L7C4	0.0178	21.5561	51.7353	1.3101	0.6994	0	-0.002	0.2599	22.6786	1.3374	-0.0137	-0.0708	99.5948	98.07	61.9761	0.615212
355	K9_L7C4	0.0202	21.5207	51.4882	1.4179	0.7344	-0.0157	0.004	0.1669	22.6105	1.2726	0.0104	0.0493	99.2951	100.07	61.9606	0.616143
355	K9_L7C4	0.0285	21.5659	52.0331	1.2743	0.711	0.0367	0.0338	0.1232	22.5875	1.2494	0.0085	0.0339	99.6857	102.07	62.0631	0.617099
355	K9_L7C4	-0.0131	21.8011	51.8302	0.999	0.7386	-0.0157	-0.004	0.1615	22.5083	1.2079	0.0026	0.0554	99.3047	104.07	62.362	0.620859
355	K9_L7C4	0.0249	21.7805	52.2682	0.7593	0.7226	0.0682	-0.0179	0.0603	22.2686	1.123	-0.0314	0.0247	99.1002	106.07	62.6013	0.623885
355	K9_L7C4	0.0201	21.8904	52.4169	0.8523	0.6821	-0.021	0.006	0.1699	22.2418	1.3181	-0.0007	-0.0462	99.5975	108.07	62.7985	0.62336
355	K9_L7C4	-0.0083	21.9428	52.7166	0.7363	0.7457	0.063	-0.002	0.1014	22.2563	1.2267	-0.0092	0.1387	99.9275	110.07	62.7576	0.624699
355	K9_L7C4	0.0142	21.9137	52.2308	0.6871	0.7724	-0.021	-0.0079	0.0822	22.2391	1.2264	-0.0007	0.0894	99.2553	112.07	62.7094	0.624562
355	K9_L7C4	0.0308	21.9083	52.7672	0.7327	0.7177	0.0105	-0.0099	0.0493	22.3861	1.2795	-0.0347	0.0308	99.913	114.07	62.6263	0.622506
355	K9_L7C4	-0.0177	21.9706	52.4882	0.7876	0.6968	0.0158	0.0219	0.096	22.0819	1.1708	-0.0124	0.0401	99.3695	116.07	63.0267	0.627308
355	K9_L7C4	0.0166	21.9975	52.6827	0.6916	0.706	0.0735	-0.0258	0.0904	22.5172	1.1644	-0.002	-0.0062	99.9399	118.07	62.6051	0.623316
355	K9_L7C4	0.0344	21.9937	52.1472	0.6626	0.7081	0.0367	0.0079	0.0493	22.4764	1.2024	0.0248	-0.0247	99.3437	120.07	62.6392	0.623299
355	K9_L7C4	0.0059	21.9555	51.8298	0.6512	0.7704	-0.0157	-0.0338	0.1424	22.3941	1.2496	0.0105	0.0308	99.0403	122.07	62.601	0.623233
355	K9_L7C4	0.0059	21.8613	52.6874	0.6713	0.7339	-0.0263	0.0437	0.1234	22.2726	1.1737	-0.0052	0.0185	99.5918	124.07	62.6694	0.6242
355	K9_L7C4	0.0296	21.9226	52.8856	0.5885	0.7313	0.0262	-0.004	0.0575	22.3699	1.2413	0.0124	-0.0092	99.8649	126.07	62.6404	0.623204
355	K9_L7C4	0.0047	21.9004	52.5487	0.6615	0.7847	-0.0367	-0.0119	0.1041	22.4001	1.2763	-0.0137	0.0154	99.6959	128.07	62.5178	0.622314
355	K9_L7C4	0	21.7857	52.4664	0.562	0.7003	0	0	0.0822	22.2043	1.2233	0.0007	0.0154	99.0401	130.07	62.7008	0.623567
355	K9_L7C4	0.0142	21.7424	52.4874	0.6081	0.7384	-0.0105	-0.0139	0.1645	22.1013	1.1912	-0.0144	0.0216	99.0691	132.06	62.7092	0.624461
355	K9_L7C4	0.019	21.8751	52.9203	0.6915	0.7176	0.0105	0.0099	0.1315	22.6379	1.2142	-0.0013	-0.0863	100.227	134.06	62.339	0.620312
355	K9_L7C4	0.0059	21.8369	52.19	0.805	0.6849	0	0.0238	0.0137	22.5792	1.2816	0.0013	-0.0739	99.4224	136.07	62.3984	0.619806
355	K9_L7C4	0.0379	21.7497	52.0766	0.8312	0.716	0.0315	0.004	0.0959	22.4701	1.1611	-0.0248	-0.0123	99.1738	138.07	62.3739	0.621154
355	K9_L7C18	3.2644	0.4035	74.182	10.7126	0.305	0.049	3.7156	0.5981	1.7202	-0.0215	0.0213	-0.0251	94.9717	0	25.4136	0.297499
355	K9_L7C18	0.3579	16.5355	56.878	3.8124	1.0954	0.1743	1.0002	0.3084	17.1667	0.6742	0.0087	0.0279	98.0395	1.35	61.3489	0.62283
355	K9_L7C18	0.0309	22.8853	52.4352	1.7292	1.4146	0.0211	0.0878	0.3212	18.0934	0.9022	-0.0053	0.0526	97.9736	2.7	67.2064	0.682162
355	K9_L7C18	0.0362	24.3078	52.1254	1.9084	1.4919	0	0.03	0.2722	17.2209	0.5431	-0.0254	0.0279	97.964	4.05	69.3698	0.709154
355	K9_L7C18	-0.0045	24.455	52.8303	1.9372	1.511	-0.0476	-0.026	0.2669	16.9558	0.5945	0.0194	0.0031	98.5731	5.4	69.7656	0.712873
355	K9_L7C18	0.009	24.4959	52.2329	1.9025	1.5529	-0.0211	0.026	0.3225	16.7296	0.5496	0.0134	0.0496	97.8838	6.75	69.9939	0.716394
355	K9_L7C18	0.0349	24.9912	51.9154	2.5755	1.6277	0	0.01	0.2531	16.6429	0.6335	0.0241	-0.0186	98.7082	8.1	70.4025	0.720463
355	K9_L7C18	0.0698	24.6808	51.7539	2.7426	1.7506	0.0053	0.044	0.3782	16.8621	0.4988	-0.0134	-0.0186	98.7862	9.45	69.7227	0.716971
355	K9_L7C18	0.034	24.0243	51.0841	3.2365	1.8686	0.0053	0.028	0.325	17.2142	0.6266	-0.0094	0.0743	98.5208	10.8	68.5931	0.705821
355	K9_L7C18	0.0337	24.8945	52.0483	2.6422	1.7994	0.0211	0.004	0.4121	16.3637	0.5143	0	0.0062	98.7395	12.16	70.3877	0.72438
355	K9_L7C18	0.0103	23.8563	52.0764	1.4806	1.5277	-0.0369	-0.002	0.2492	18.3235	0.7623	0.0213	0	98.3075	13.51	67.7088	0.690111
355	K9_L7C18	0.0059	22.0925	51.3991	0.9688	1.0058	0.0472	-0.0099	0.0769	21.3862	1.1123	-0.0197	0.0678	98.1625	14.86	63.4607	0.636268
355	K9_L7C18	0.0059	21.4679	52.2252	0.6278	0.7509	0.063	-0.0159	0.1534	22.1155	1.2292	0.0183	-0.0647	98.6571	16.21	62.3809	0.620945
355	K9_L7C18	0	21.6524	51.5884	0.6161	0.6943	-0.0105	-0.0139	0.1506	22.3789	1.2287	-0.0065	0.0185	98.3279	17.56	62.3884	0.620325
355	K9_L7C18	0.0379	21.52	51.7866	0.6699	0.7578	0.0367	0.0099	0.178	22.0947	1.2409	-0.0307	-0.0339	98.3325	18.91	62.4499	0.621606
355	K9_L7C18	0.0142	21.4938	52.1677	0.6582	0.7721	0.0367	-0.002	0.1534	22.2666	1.3001	0.0105	-0.077	98.8733	20.26	62.2285	0.618992
355	K9_L7C18	0.038	21.4287	52.2844	0.6662	0.7122	0.042	0.0179	0.0904	22.359	1.1406	-0.0078	0.0524	98.8318	21.61	62.1413	0.618969
355	K9_L7C18	0.0119	21.4664	52.1816	0.6167	0.755	-0.0315	0.0199	0.0959	22.2652	1.2501	-0.0026	0.0432	98.7058	22.96	62.2221	0.619212
355	K9_L7C18	0.0368	21.5558	51.9987	0.6323	0.6861	-0.0105	-0.0119	0.0603	22.3045	1.3477	-0.0222	-0.0031	98.6222	24.31	62.3692	0.618812
355	K9_L7C18	-0.0261	21.5149	52.1197	0.6884	0.7049	0.0262	0.0139	0.0959	22.4483	1.2675	0.0072	0.037	98.9238	25.66	62.1551	0.61774
355	K9_L7C18	0.0178	21.5607	51.6248	0.6639	0.702	0.0157	0.0219	0.0438	22.1621	1.259	-0.019	0.0123	98.084	27.01	62.4983	0.621188
355	K9_L7C18	0.0403	21.5624	52.1969	0.6069	0.7035	0	-0.0139	0.1206	22.1665	1.2708	0.0033	0.0462	98.7175	28.36	62.4938	0.621043
355	K9_L7C18	0.0095	21.6576	51.7444	0.5861	0.7051	-0.0367	0.0079	0.0712	22.3071	1.1938	0.0137	0.0154	98.3121	29.71	62.4525	0.621452
355	K9_L7C18	0.0178	21.6026	51.5631	0.6575	0.7757	0.0419	0.0397	0.104	22.4332	1.2994	0.032	-0.0246	98.567	31.06	62.1747	0.618529
355	K9_L7C18	0.0059	21.5588	52.061	0.7431	0.7122	0.0157	0.0238	0.1205	22.3283	1.3093	0.0229	-0.0247	98.9017	32.41	62.3146	0.618995
355	K9_L7C18	0.0356	20.84	50.716	1.6587	0.7625	0	0.0079	0.0959	22.1544	1.1225	0.0111	0.0431	97.4477	33.77	61.6267	0.614636
355	K9_L7C18	0.0012	21.5561	51.8409	0.6437	0.7596	0.0525	0.0119	0.0548	22.2366	1.2203	0.0333	-0.0524	98.4109	35.12	62.343	0.620784
355	K9_L7C18	0.0428	21.5705	51.664	0.6889	0.7056	0.0052	-0.0278	0.1451	22.4603	1.1136	-0.0131	0.0247	98.4207	36.47	62.2028	0.619783
355	K9_L7C18	0.0202	21.5967	51.7785	0.6821	0.6692	-0.0682	-0.0218	0.1314	22.3266	1.1962	0.0274	0.0863	98.5146	37.82	62.4133	0.62057
355	K9_L7C18	0.0083	21.7065	51.9217	0.553	0.7046	0.0367	-0.0079	0.0986	22.4659	1.2758	-0.0013	0.0832	98.8542	39.17	62.3461	0.619573
355	K9_L7C18	-0.0083	21.6778	51.924	0.5561	0.6733	0	-0.002	0.1068	22.2804	1.2676	0.0065	-0.0185	98.4925	40.52	62.5426	0.621191
355	K9_L7C18	0.0154	21.6687	52.5403	0.4245	0.7005	0.0525	-0.004	0.0685	22.1619	1.3539	0.0366	0.0216	99.0445	41.87	62.6175	0.621403
355	K9_L7C18	0.0166	21.7382	52.5044	0.4561	0.7883	0.0105	0.0159	0.1014	22.2625	1.206	0.0026	-0.0432	99.1024	43.22	62.4771	0.622648
355	K9_L7C18	-0.0225	21.7268	52.1515	0.4664	0.7572	-0.0157	-0.0298	0.1452	22.4008	1.1702	0.017	-0.0031	98.835	44.57	62.3657	0.621505
355	K9_L7C18	0.0071	21.7374	52.1169	0.4349	0.7206	-0.0682	-0.0139	0.0822	22.3256	1.3145	-0.0157	0.0801	98.8193	45.92	62.5	0.620913
355	K9_L7C18	0.0012	21.7337	52.2122	0.5259	0.7574	0	-0.002	0.1507	22.147	1.2178	-0.0065	-0.0586	98.7458	47.27	62.6288	0.623637
355	K9_L7C18	-0.0059	21.8201	51.6868	0.485	0.7682	-0.0472	0.0278	0.0192	22.2385	1.2468	0.0431	-0.0216	98.3356	48.62	62.6153	0.623358
355	K9_L7C18	0.0344	21.8166	51.6381	0.4919	0.7255	0.0315	-0.0079	0.0027	22.2834	1.2052	0.0457	-0.0493	98.275	49.97	62.6214	0.623292
355	K9_L7C18	0.0486	21.914	52.3499	0.478	0.7226	0.0052	-0.006	0.0356	22.269	1.2324	-0.0209	-0.0062	99.0553	51.32	62.7439	0.624207
355	K9_L7C18	0.0321	21.6613	52.2048	0.4812	0.8059	-0.0052	0.0119	0.1479	22.4045	1.3353	0.0026	-0.0216	99.0873	52.67	62.2285	0.619093
355	K9_L7C18	-0.019	22.1046	51.3734	0.5323	0.7189	0.0157	0.0099	0.1205	22.2229	1.3174	0.0098	0.0123	98.4377	54.03	62.9973	0.625838
355	K9_L7C18	0.0071	21.8618	52.4953	0.5141	0.8016	0.0157	0.0159	0.1096	22.2552	1.268	0.0144	0.0154	99.3743	55.38	62.6001	0.623425
355	K9_L7C18	0.0201	21.9581	52.1331	0.5262	0.7178	-0.0367	-0.0457	0.0493	22.2204	1.2204	-0.0235	0.0154	98.8608	56.73	62.8461	0.625284
355	K9_L7C18	-0.0071	21.9419	52.0132	0.5097	0.7133	0.0263	-0.006	0.0822	22.0308	1.1767	0.002	-0.0092	98.4962	58.08	63.0266	0.627457
355	K9_L7C18	-0.0083	21.8669	52.27	0.438	0.7503	0.042	0.0099	0.1343	22.0021	1.2949	0.0183	0.0185	98.8451	59.43	62.9278	0.62574
355	K9_L7C18	0.0308	21.9209	51.8538	0.5101	0.7463	-0.021	0.002	0.0521	22.2216	1.191	0.0177	-0.0216	98.5462	60.78	62.7684	0.625173
355	K9_L7C18	0.0119	21.8316	51.8521	0.5813	0.7121	-0.0315	-0.0099	0.063	22.234	1.3208	-0.0379	-0.0462	98.6068	62.13	62.7047	0.622779
355	K9_L7C18	-0.0036	21.8318	52.2797	0.5046	0.7018	0.0157	-0.006	0.1397	22.1818	1.3446	0.0307	0.0955	99.1261	63.48	62.7711	0.623061
355	K9_L7C18	0.013	21.8763	51.8738	0.5049	0.6906	0.0157	0.0079	0.1041	22.2666	1.1993	-0.015	0.0616	98.6139	64.83	62.7474	0.624161
355	K9_L7C18	0.0225	21.7786	51.6455	0.5132	0.7549	-0.021	-0.0159	0.0521	22.1435	1.2027	0.0242	0	98.1372	66.18	62.6839	0.62431
355	K9_L7C18	0.0083	21.734	52.4862	0.5352	0.7628	0.0262	-0.0099	0.1617	22.1173	1.2058	0.0249	-0.0031	99.0623	67.53	62.6522	0.624061
355	K9_L7C18	-0.0035	21.7949	52.7592	0.5152	0.7244	-0.0105	-0.0119	0.0795	22.0051	1.2654	-0.0183	0.0247	99.1683	68.88	62.8815	0.625238
355	K9_L7C18	0.0201	21.7673	52.0752	0.6335	0.7714	0	0.0218	0.0877	22.2124	1.1523	0.0052	-0.0062	98.747	70.23	62.5808	0.624009
355	K9_L7C18	-0.0166	21.7122	52.0958	0.5093	0.743	0.0052	0.002	0.0438	22.2852	1.1257	0.0477	-0.0031	98.57	71.58	62.4846	0.622954
355	K9_L7C18	0.013	21.837	52.0407	0.5377	0.7179	0.0105	-0.004	0.167	22.2743	1.2935	0.002	-0.0554	98.8936	72.93	62.6623	0.622711
355	K9_L7C18	0.0438	21.825	52.2792	0.5474	0.7052	-0.0105	0.0079	0.1069	22.0619	1.1615	-0.0033	0.0863	98.8252	74.29	62.881	0.626049
355	K9_L7C18	0.0403	21.8277	52.2514	0.574	0.7872	0.0157	0.0298	0.137	22.1919	1.2647	0.0124	0.0462	99.1784	75.64	62.6459	0.623724
355	K9_L7C18	-0.0047	21.6856	52.8265	0.5117	0.7588	0.0367	-0.006	0.1754	22.1478	1.3331	-0.0262	0	99.4757	76.99	62.5743	0.621938
355	K9_L7C18	0.0486	21.7265	52.4278	0.5089	0.7317	-0.0629	0.002	0.1561	22.1892	1.3651	0.0059	-0.0031	99.1616	78.34	62.6117	0.621644
355	K9_L7C18	0.0071	21.7993	51.9616	0.5079	0.7601	-0.021	0.0159	0.1041	22.2051	1.2613	0.0333	-0.0462	98.6556	79.69	62.6371	0.623321
355	K9_L7C18	0.0189	21.6663	52.6288	0.4158	0.7406	0.0105	-0.0179	0.1288	22.1112	1.0871	0.0111	0.1171	98.9363	81.04	62.6143	0.624602
355	K9_L7C18	0.0261	21.6107	52.9624	0.4915	0.9324	0.1416	0.0218	0.1206	22.1675	1.2356	-0.017	-0.0709	99.7102	82.39	62.2488	0.621917
355	K9_L7C18	0.0213	21.6404	51.7785	0.5323	0.8312	0.1729	-0.0179	0.2054	22.0138	1.368	-0.0301	0.0123	98.5762	83.74	62.5673	0.622436
355	K9_L7C18	-0.0012	21.6431	52.2469	0.5305	0.7468	-0.0052	0.0298	0.1397	22.0685	1.291	0.0157	-0.1109	98.7119	85.09	62.6245	0.6227
355	K9_L7C18	0.0379	21.5987	52.9517	0.4619	0.755	-0.0262	-0.002	0.159	22.1715	1.2533	-0.0065	-0.0216	99.3889	86.44	62.4612	0.621566
355	K9_L7C18	0.0166	21.6636	52.3006	0.4776	0.7007	-0.0629	-0.0079	0.126	22.3048	1.2849	-0.0026	0.04	98.9147	87.79	62.467	0.620618
355	K9_L7C18	0.0095	21.5876	52.1344	0.5222	0.731	0.0052	-0.0218	0.1205	22.1801	1.2233	0.0235	-0.0062	98.5374	89.14	62.4716	0.621664
355	K9_L7C18	0.0355	21.5186	52.9658	0.4932	0.7345	0.0105	-0.0219	0.1124	22.1211	1.2532	0.0111	0.0678	99.3238	90.49	62.4519	0.621199
355	K9_L7C18	0.0166	21.4306	52.5015	0.4916	0.7142	0.0157	-0.006	0.1945	22.1355	1.2497	0.0307	-0.0062	98.7807	91.84	62.3675	0.620125
355	K9_L7C18	0.013	21.3683	53.1525	0.4944	0.6837	0.0052	-0.0139	0.1809	22.1941	1.2117	-0.0039	0.0216	99.3254	93.19	62.2793	0.619237
355	K9_L7C23	2.6046	3.1719	71.5657	11.3502	1.4052	0.1236	2.4435	0.4038	8.5898	0.1608	-0.018	0.0406	101.86	0	35.2407	0.392461
355	K9_L7C23	1.8343	8.3387	66.2026	8.1022	2.3301	1.3707	1.8234	0.2839	9.0408	0.5424	0.0014	0.0343	99.9048	2.05	55.2772	0.607835
355	K9_L7C23	1.3361	2.4127	71.8331	9.8162	0.758	0.2957	2.9548	0.5462	8.356	0.1669	-0.0083	-0.025	98.4756	4.1	31.5586	0.335321
355	K9_L7C23	0.1291	18.0679	55.5437	2.9525	1.5253	0.3674	0.543	0.2923	21.0987	0.6702	0.0264	0.0278	101.244	6.15	58.2828	0.596597
355	K9_L7C23	0.0352	23.7699	54.2042	1.6869	1.7912	-0.0317	0.034	0.2276	17.7449	0.7039	0.0274	-0.0372	100.225	8.2	67.8906	0.696562
355	K9_L7C23	0.0643	24.7982	53.9122	1.8419	1.6746	-0.0317	0.022	0.3196	17.1983	0.6569	-0.002	0.0651	100.553	10.25	69.5603	0.712192
355	K9_L7C23	0.0518	24.8822	53.7943	2.0056	1.782	-0.0793	0.038	0.2281	16.8899	0.5975	0.0576	0.0496	100.377	12.3	69.8191	0.717132
355	K9_L7C23	0.0572	25.151	53.5075	2.2365	1.8518	0.0053	0.002	0.284	16.6408	0.5682	-0.0047	0.0124	100.317	14.35	70.2202	0.722539
355	K9_L7C23	0.0863	25.113	53.3788	2.0894	1.8784	0.0952	-0.012	0.2562	16.4247	0.5892	-0.0154	-0.0217	99.9112	16.4	70.3895	0.724513
355	K9_L7C23	0.0554	23.0792	53.6409	0.8618	1.4259	0.0474	0.0598	0.1133	19.5375	0.8146	0.006	0	99.6417	18.45	65.8194	0.668915
355	K9_L7C23	0.0331	21.7158	53.4074	0.6733	0.7535	0.0472	-0.0179	0.1398	22.244	1.3067	0.019	0.0339	100.374	20.5	62.5165	0.621571
355	K9_L7C23	0.0225	21.4914	52.8866	1.0317	0.7906	-0.0105	0.0179	0.137	22.2779	1.2267	-0.0164	0.0062	99.8886	22.54	62.1905	0.619597
355	K9_L7C23	0.0355	21.5143	53.4525	0.7881	0.7516	0.021	0.0199	0.1726	22.2395	1.3831	-0.0111	-0.0123	100.378	24.59	62.3048	0.618648
355	K9_L7C23	0.0627	21.531	53.4312	0.734	0.7559	0.0262	0.0338	0.0603	22.4402	1.1378	-0.015	-0.0092	100.213	26.64	62.1151	0.619307
355	K9_L7C23	0.0557	21.5449	53.1808	0.6501	0.7944	-0.0105	0.0139	0.1589	22.3963	1.1702	-0.0164	0.0247	99.9899	28.69	62.1248	0.61957
355	K9_L7C23	0.0438	21.5726	53.7165	0.7535	0.812	-0.0157	-0.0079	0.063	22.4324	1.1436	-0.0098	0.0832	100.621	30.74	62.0962	0.619782
355	K9_L7C23	0.0592	21.6234	53.4197	0.7161	0.7362	0.0263	-0.006	0.1124	22.3508	1.1647	-0.0079	-0.0154	100.209	32.79	62.3311	0.620938
355	K9_L7C23	0.0652	21.6013	52.9204	0.677	0.8365	-0.0262	0.0179	0.1533	22.4594	1.3794	0.0405	0.0123	100.163	34.84	62.069	0.617452
355	K9_L7C23	0.0166	21.6814	53.2406	0.6451	0.8101	0.0262	-0.004	0.1973	22.3248	1.2618	0.017	0.0277	100.249	36.89	62.3249	0.620846
355	K9_L7C23	0.0473	21.6681	53.8046	0.6167	0.8615	0	-0.004	0.0329	22.3991	1.1412	-0.0052	0.0493	100.621	38.94	62.1699	0.621179
355	K9_L7C23	0.0307	21.6963	53.7564	0.5884	0.8554	0.0053	-0.0159	0.1344	22.2412	1.0381	-0.0013	0.0123	100.359	40.99	62.3667	0.624116
355	K9_L7C23	0.0071	21.7807	53.2488	0.6269	0.8599	-0.0368	0.004	0.1015	22.0736	1.1207	-0.0183	0.0247	99.8478	43.04	62.6208	0.625872
355	K9_L7C23	0.0083	21.8986	53.1156	0.6589	0.9072	0.042	0.0179	0.0932	22.1069	1.1707	0.0144	0.0955	100.129	45.09	62.6525	0.62629
355	K9_L7C23	-0.0059	21.9887	53.6693	0.739	0.9046	0.0053	-0.0159	0.107	21.8991	1.1032	-0.0125	0.1171	100.533	47.14	62.9614	0.630035
355	K9_L7C23	0.0294	22.1355	53.316	0.7362	0.8932	0	0.0099	0.1344	21.8456	1.1832	0.0052	0	100.289	49.19	63.1853	0.631307
355	K9_L7C23	0.0247	22.215	53.2845	0.7447	0.8859	0.0053	0.0179	0.1291	21.7477	1.0033	-0.0426	-0.0123	100.058	51.24	63.3772	0.63498
355	K9_L7C23	0.0236	22.0711	52.9528	1.0112	0.9012	0.0525	-0.0119	0.2141	21.9258	1.1479	-0.0269	0.0154	100.316	53.29	63.026	0.630179
355	K9_L7C23	0.0141	21.7354	52.6182	1.5493	0.9348	0.021	0.004	0.2881	21.8414	1.1801	0.0269	0.0031	100.216	55.34	62.7101	0.627126
355	K9_L7C23	0.0188	21.5992	52.0021	1.7369	1.3333	0.0157	0.0179	0.2471	21.5699	1.1124	0.0059	0.0401	99.6993	57.39	62.3209	0.629131
355	K9_L7C23	0.0176	21.8526	52.6067	1.804	1.0853	-0.0052	0.002	0.3514	21.6538	1.1598	0.0295	0.0062	100.569	59.44	62.8305	0.630499
355	K9_L7C23	0.0411	21.9704	52.1035	1.8609	1.1263	0.0367	-0.0159	0.2609	21.5013	1.009	0.0158	-0.0956	99.9261	61.49	63.0573	0.634877
355	K9_L7C23	0.0129	21.719	52.6056	1.9894	1.3811	-0.0262	0.0258	0.2474	21.3089	1.0333	0.023	-0.0833	100.346	63.54	62.6526	0.633942
355	K9_L7C23	0.0293	21.8771	52.2524	1.9304	1.1333	0.0105	-0.0298	0.2556	21.4569	0.9564	-0.0053	-0.0247	99.902	65.59	62.9941	0.634898
355	K9_L7C23	0.007	22.2313	52.5639	1.5723	1.0578	-0.0263	-0.004	0.2363	21.494	1.0094	0.0125	-0.0339	100.184	67.64	63.4282	0.63768
355	K9_L7C23	0.0246	22.5683	53.4087	0.9606	0.9444	0.0315	-0.0139	0.143	21.1504	0.9685	-0.0256	-0.0524	100.2	69.69	64.2746	0.645107
355	K9_L7C23	0.0223	22.7165	53.8808	0.6652	0.9182	0.0158	0.0458	0.1072	21.3814	1.072	-0.0164	0.0617	100.887	71.74	64.2231	0.643155
355	K9_L7C23	0.0106	22.5493	53.9631	0.6847	0.7839	-0.021	-0.0099	0.1538	21.5139	1.1368	-0.0046	-0.0432	100.796	73.79	64.0935	0.639436
355	K9_L7C23	0.0129	22.4723	52.9591	0.8086	0.832	0.0105	-0.0219	0.1043	21.5034	1.1215	0.0072	-0.111	99.8319	75.84	63.9625	0.638912
355	K9_L7C23	0.0212	22.2943	53.0253	0.8014	0.7957	-0.0158	0.004	0.1043	21.4917	1.1454	0.0125	-0.0524	99.6957	77.89	63.8386	0.636948
355	K9_L7C23	0.0376	22.1585	53.1004	0.8916	0.8203	0.042	0.0179	0.1208	21.5202	1.1071	0.0158	0	99.8323	79.94	63.6359	0.635639
355	K9_L7C23	0.0635	22.3153	52.8968	0.8015	0.7633	-0.0158	0.0159	0.118	21.6958	1.1209	0.0184	0.0031	99.8123	81.99	63.6941	0.635341
355	K9_L7C23	-0.0035	22.2584	53.3506	0.7081	0.7404	-0.0315	-0.004	0.1372	21.7984	1.0647	0.0085	0.0031	100.07	84.04	63.5604	0.634286
355	K9_L7C23	0.0094	22.2809	53.1199	0.7262	0.748	0.0472	-0.0278	0.1673	21.6551	1.1145	-0.0059	0.0555	99.924	86.09	63.72	0.635463
355	K9_L7C23	-0.0024	22.2149	53.5396	0.6354	0.7419	-0.0158	-0.0199	0.1673	21.922	1.1473	0.0374	0.0616	100.467	88.14	63.3874	0.631736
355	K9_L7C23	0.0436	22.1569	52.6364	0.6861	0.7528	-0.0052	0.0139	0.096	21.7577	1.3009	-0.0013	0.0462	99.4905	90.19	63.4798	0.631216
355	K9_L7C23	0.026	22.1842	52.9285	0.6478	0.7723	-0.0367	0.006	0.0658	22.017	1.2529	0.0229	0.0647	99.988	92.24	63.2197	0.629385
355	K9_L7C23	0.039	22.1027	52.8388	0.7124	0.7334	0.021	-0.0139	0.1891	22.0399	1.2825	-0.0137	-0.0493	99.9587	94.29	63.1613	0.627996
355	K9_L7C23	0.0059	22.0949	53.1346	0.7248	0.7255	0.021	-0.0119	0.0411	22.056	1.2084	-0.0301	-0.0246	100.012	96.34	63.147	0.628504
355	K9_L7C23	0.0696	22.0851	53.4382	0.6271	0.7327	0	0.0159	0.0795	22.0583	1.2736	-0.0458	-0.0339	100.38	98.38	63.1251	0.627716
355	K9_L7C23	0.0083	22.0029	52.7636	0.659	0.755	-0.0105	0.004	0.063	21.9124	1.1467	-0.0137	-0.0493	99.3149	100.43	63.1573	0.629605
355	K9_L7C23	0.0425	22.1847	52.8345	0.6219	0.6939	-0.0105	-0.002	0.0548	22.2666	1.1403	0.0092	-0.0709	99.8484	102.48	63.0698	0.628035
355	K9_L7C23	0.0318	22.1295	52.6112	0.6726	0.7142	-0.0052	0.0357	0.1068	21.9445	1.3058	0.0065	0	99.5587	104.53	63.3112	0.628998
355	K9_L7C23	0.0319	22.081	52.6339	0.6563	0.7305	0	0.004	0.0384	21.9666	1.2117	0.0164	0.0247	99.3951	106.58	63.2166	0.629222
355	K9_L7C23	0.0071	22.0757	53.3638	0.6917	0.7021	0.084	0.0099	0.0685	22.0406	1.2326	0.0059	-0.0462	100.282	108.63	63.1728	0.62821
355	K9_L7C23	0.0035	22.1606	53.378	0.6602	0.7448	0.0105	-0.0179	0.0768	22.0199	1.1704	-0.0079	-0.037	100.225	110.68	63.2276	0.629946
355	K9_L7C23	0.0459	22.1217	53.5679	0.7559	0.749	-0.042	0.0099	0.1207	22.0322	1.1443	-0.0164	-0.0247	100.547	112.73	63.1689	0.629678
355	K9_L7C23	0.0177	22.1445	52.8496	0.8463	0.7238	0.0157	-0.004	0.0575	22.2036	1.22	-0.0242	0.0123	100.091	114.78	63.0524	0.627434
355	K9_L7C23	0.0342	22.1008	52.8103	0.7087	0.7458	-0.0577	0.006	0.1205	21.9971	1.3737	-0.0216	0.0062	99.9031	116.83	63.1866	0.62748
355	K9_L7C23	0.059	22.0968	52.9132	0.6723	0.7278	-0.0105	-0.0357	0.1151	21.919	1.2318	0.0033	0.1232	99.8615	118.88	63.2851	0.629663
355	K9_L7C23	0.0224	22.1557	52.8848	0.7103	0.7492	0.0157	0.0258	0.137	21.9941	1.1228	-0.0249	0.0246	99.8425	120.93	63.2429	0.630638
355	K9_L7C23	0.0401	22.2078	52.9641	0.8165	0.6962	0.0157	-0.0218	0.126	22.0556	1.2379	-0.0098	0.0616	100.222	122.98	63.304	0.629398
355	K9_L7C23	-0.0083	22.0617	52.8101	0.8195	0.6795	-0.0052	0.0258	0.1287	22.0483	1.3265	-0.0007	0.0031	99.9032	125.03	63.1796	0.627032
355	K9_L7C23	0.0213	22.2387	52.967	0.7805	0.7126	0.0262	0.0119	0.1123	22.195	1.3054	0.0157	0.1078	100.494	127.08	63.1743	0.627651
355	K9_L7C23	0.013	22.0555	53.0701	0.8371	0.7114	0.0735	0	0.0932	21.8568	1.4011	0.034	0	100.146	129.13	63.3263	0.628128
355	K9_L7C23	0.0235	21.925	53.8772	0.8189	0.6691	-0.0315	-0.0298	0.0658	21.9483	1.0969	-0.0098	-0.0062	100.425	131.18	63.1503	0.628925
355	K9_L7C23	0.0083	22.2494	53.0164	0.8282	0.7286	-0.042	0.006	0.0767	22.187	1.2378	-0.0242	-0.0554	100.338	133.23	63.1729	0.628524
355	K9_L7C23	0.02	22.1507	53.17	0.6984	0.6718	-0.021	0.004	0.0795	21.9274	1.2559	0.0353	0.0185	100.031	135.28	63.4061	0.629901
355	K9_L7C23	0.0294	22.2572	53.1708	0.7498	0.6653	-0.0262	-0.0258	0.0959	21.9947	1.2408	-0.0438	0.0308	100.235	137.33	63.4574	0.630497
355	K9_L7C23	0.0389	22.1207	52.4761	0.6907	0.6768	-0.0262	0.0238	0.1232	21.95	1.2106	0.0111	0.0431	99.3651	139.38	63.3451	0.629819
355	K9_L7C23	0.0354	22.1386	52.1427	0.7595	0.6716	-0.021	-0.0258	0.074	21.9643	1.1846	-0.0242	0.0154	98.9861	141.44	63.3561	0.630128
355	K9_L8C1	2.2488	0.1325	21.2904	2.4316	0.6747	0.0265	2.1083	0.3077	1.0168	-0.0244	-0.0282	-0.0468	30.2373	0	11.1547	0.192292
355	K9_L8C1	5.6371	0.2225	51.1045	12.4781	2.2566	0.0108	2.0385	0.3371	1.5018	0.0031	-0.0021	0.0063	75.5963	2	8.28099	0.208575
355	K9_L8C1	3.2202	6.955	60.243	8.1122	1.1088	0.0053	2.2347	0.4264	9.7468	0.3501	-0.0007	0.028	92.4305	4	52.6104	0.551031
355	K9_L8C1	0.0519	24.8164	52.8434	1.889	1.6994	-0.0317	0.006	0.3112	16.9729	0.7164	0.002	0.0279	99.3365	6	69.7884	0.714241
355	K9_L8C1	0.037	25.4931	52.2477	2.4094	1.9396	0.0422	-0.004	0.306	16.5379	0.5794	-0.0027	-0.0372	99.5923	8	70.4915	0.7263
355	K9_L8C1	0.0115	24.2662	52.6235	1.1476	1.227	0.0263	0.0139	0.2401	19.4446	0.8375	0.0251	-0.0525	99.8633	10	67.3007	0.680673
355	K9_L8C1	-0.0047	22.2849	52.5488	0.5988	0.7292	-0.0472	-0.004	0.0356	22.2503	1.2404	0.0183	-0.0216	99.7062	12	63.1457	0.628241
355	K9_L8C1	0.0059	22.1329	53.071	0.5582	0.7784	-0.0052	0.0099	0.0575	22.207	1.1669	-0.0386	0.037	100.025	14	62.9664	0.627815
355	K9_L8C1	-0.0024	22.1947	52.4773	0.5272	0.7666	0.021	0.0377	0.063	21.9805	1.0752	-0.0072	0.0986	99.2418	16	63.275	0.631671
355	K9_L8C1	0.0484	22.1893	52.8738	0.5997	0.794	0.0052	0.006	0.1835	22.1374	1.1904	0.0098	0.0277	100.065	18	63.0756	0.628867
355	K9_L8C1	0.0106	22.2414	52.8032	0.4939	0.8924	-0.0315	0.0357	0.0329	22.1738	1.1728	0.0314	-0.0246	99.8882	20	62.9673	0.629228
355	K9_L8C1	0.0307	22.152	52.6052	0.7129	0.9236	-0.0157	-0.002	0.1397	22.2858	1.3117	0.0327	0.0031	100.197	22	62.7216	0.625772
355	K9_L8C1	-0.0012	21.9605	52.2979	0.9146	0.8592	0.0105	0.002	0.0987	22.1761	1.0843	-0.0111	-0.0277	99.4037	24	62.7108	0.627135
355	K9_L8C1	0.0213	21.9721	52.5324	0.7588	0.8811	-0.0105	0.0079	0.1041	22.2373	1.1284	0.0353	0.0431	99.7218	26	62.6336	0.626196
355	K9_L8C1	0.0626	22.1827	52.5131	0.6384	0.8733	0.021	0.0079	0.137	22.1335	1.1227	-0.0111	-0.037	99.6922	28	62.9705	0.629523
355	K9_L8C1	-0.0259	22.1445	52.9024	0.6377	0.7715	-0.021	0.0199	0.0603	22.1125	1.0696	-0.0072	0.0431	99.7614	30	63.0826	0.629871
355	K9_L8C1	0.0283	22.1864	52.7647	0.6064	0.7727	-0.0052	-0.002	0.0959	22.1024	1.1608	0.0078	0.0154	99.7407	31.99	63.1353	0.629487
355	K9_L8C1	0.0213	22.2583	52.3198	0.6922	0.7392	0.0315	-0.0079	0.0903	22.3742	1.2932	-0.015	-0.0462	99.82	33.99	62.9809	0.626204
355	K9_L8C1	0.0578	22.1616	52.6337	0.6779	0.6827	-0.0682	0.0179	0.0904	22.1854	1.1314	0.0268	0.0123	99.6778	35.99	63.1418	0.628693
355	K9_L8C1	0.0236	22.1298	52.8316	0.5801	0.7086	0.0105	0.0159	0.115	22.2815	1.1784	0.0157	0.0246	99.9154	37.99	62.9781	0.626923
355	K9_L8C1	0.0413	22.2674	52.5081	0.5938	0.7179	-0.0157	-0.002	0.1259	22.1787	1.2698	0.0288	-0.0092	99.7319	39.99	63.2139	0.628473
355	K9_L8C1	0.02	22.2485	52.771	0.5502	0.7064	0.021	-0.0139	0.0822	22.0739	1.0633	-0.0144	-0.0462	99.5365	41.99	63.3148	0.631415
355	K9_L8C1	0	22.1223	52.6146	0.5732	0.782	0.0157	0.0139	0.1561	22.0389	1.2552	-0.0131	-0.0062	99.5719	43.99	63.12	0.62849
355	K9_L8C1	0.0177	22.1783	53.0853	0.7089	0.7568	0.0105	0.0139	0.1287	22.1322	1.3289	0.0105	0.1293	100.501	45.99	63.1173	0.627403
355	K9_L8C1	0.0225	22.2391	52.614	0.5656	0.7128	0.0052	-0.0179	0.1614	22.3127	1.3075	0.0203	-0.0954	99.9611	47.99	63.0562	0.626467
355	K9_L8C1	-0.0118	22.2305	53.3087	0.7119	0.7292	-0.0105	-0.0079	0.1315	22.1358	1.2967	0.0092	-0.0955	100.553	49.99	63.204	0.628242
355	K9_L8C1	0.0212	22.2739	53.1172	0.8049	0.7192	0.0052	0.0179	0.0356	22.1614	1.2528	-0.0072	-0.0123	100.409	51.99	63.2364	0.628885
355	K9_L8C1	0.0472	22.2878	52.5205	0.6204	0.6977	0.0157	0.0357	0.0876	22.0742	1.3412	-0.0131	0.0092	99.7374	53.99	63.3667	0.629007
355	K9_L8C1	-0.0047	22.2058	53.2146	0.6341	0.7611	0.0315	-0.0159	0.0877	22.0484	1.2558	0.0105	0.0647	100.314	55.99	63.2251	0.629268
355	K9_L8C1	-0.0083	22.1838	53.4358	0.695	0.7397	-0.0157	0.0218	0.1726	22.1494	1.2617	0.0242	-0.0431	100.684	57.99	63.1278	0.627968
355	K9_L8C1	0.0224	22.2752	53.0735	0.6592	0.7733	0.0157	-0.0238	0.1014	21.9294	1.1499	-0.0458	-0.0462	100	59.99	63.4021	0.632265
355	K9_L8C1	0.0189	22.2219	52.8577	0.5882	0.7507	0.0157	0.004	0.1068	22.0539	1.3118	-0.0118	0	99.9296	61.99	63.2498	0.628815
355	K9_L8C1	0.0424	22.2885	53.507	0.6007	0.7732	0.0367	0	0.1535	21.9573	1.2534	0.0216	-0.0092	100.634	63.99	63.3878	0.631071
355	K9_L8C1	0.0248	22.2538	53.1466	0.6409	0.8124	0.0262	0.0099	0.1699	22.1346	1.2558	0.0196	0.0031	100.498	65.99	63.1223	0.628911
355	K9_L8C1	0.0047	22.1546	52.6985	0.7473	0.8037	-0.0105	-0.0159	0.1452	22.0501	1.3239	-0.0196	0.0277	99.9558	67.99	63.1146	0.628023
355	K9_L8C1	0.0071	22.0085	53.3306	0.8548	0.8511	0.0052	-0.0139	0.1617	22.0512	1.2999	-0.0196	0.0739	100.644	69.99	62.898	0.626708
355	K9_L8C1	-0.0094	22.2456	52.5475	0.6333	0.8433	0.0157	0.0119	0.0356	22.0218	1.2173	0.0216	-0.0185	99.5937	71.99	63.1873	0.630342
355	K9_L8C1	0.0047	22.2185	52.8852	0.5865	0.7951	-0.0052	0.004	0.1261	22.0832	1.1553	-0.0249	0.0031	99.8617	73.99	63.1593	0.630072
355	K9_L8C1	0.0365	22.226	53.4118	0.6319	0.9007	0.0525	0.0159	0.1371	21.8296	1.2506	-0.0288	0.0154	100.508	75.99	63.2866	0.631729
355	K9_L8C1	0.0118	22.3291	52.7917	0.6433	0.8555	0.0315	0.004	0.1261	21.986	1.3006	-0.0183	-0.0524	100.08	77.99	63.2947	0.630729
355	K9_L8C1	0.0354	22.1539	52.8388	0.7883	0.9456	0.0787	-0.0159	0.1426	22.0472	1.2414	0.0059	0.0555	100.333	79.99	62.9339	0.62888
355	K9_L8C1	0.0177	22.1037	53.303	0.7496	0.7993	-0.0052	-0.0139	0.0795	22.112	1.1793	-0.0144	0.0154	100.359	81.99	63.0043	0.628331
355	K9_L8C1	0.0083	22.2498	53.2084	0.7219	0.7642	0.0262	0	0.0904	22.1484	1.2971	0.0059	0.0062	100.527	83.99	63.1663	0.628315
355	K9_L8C1	0.0035	22.374	53.6914	0.6757	0.7	-0.0315	0.0398	0.0686	21.8937	1.187	-0.0033	-0.0185	100.634	85.99	63.636	0.633275
355	K9_L8C1	0.0188	22.1629	53.4415	0.713	0.6739	-0.0053	-0.0219	0.1893	21.9788	1.0202	0	0.0031	100.201	87.99	63.3638	0.631917
355	K9_L8C1	0.0153	22.2135	53.3235	0.6342	0.71	0.0053	-0.0099	0.0603	22.0107	1.1851	-0.0412	-0.0832	100.158	89.99	63.3375	0.630444
355	K9_L8C1	0.0177	22.1145	53.2477	0.743	0.6813	0.0682	-0.006	0.1124	22.0069	1.2322	0.0177	0.0739	100.316	91.98	63.2749	0.628962
355	K9_L8C1	0.0177	22.2383	52.6454	0.6768	0.6851	-0.042	0.0199	0.0712	22.1475	1.359	-0.0216	-0.0709	99.8611	93.98	63.2573	0.627579
355	K9_L8C1	0.0118	22.1742	53.2274	0.7648	0.7544	0	0.0179	0.0603	21.9526	1.2712	-0.0092	-0.0339	100.235	95.98	63.2976	0.629739
355	K9_L8C1	0.0389	22.2522	52.5959	0.7578	0.6885	-0.063	0.0139	0.1233	22.0628	1.194	-0.038	0.0277	99.7553	97.98	63.353	0.630237
355	K9_L8C1	-0.0012	22.1071	52.5931	0.7458	0.7018	0.0157	0.0159	0.1151	22.1787	1.1937	-0.0164	-0.0031	99.6668	99.98	63.0666	0.627554
355	K9_L8C1	0.0153	22.0523	53.1021	0.73	0.7207	-0.0105	-0.0079	0.0685	22.0557	1.3324	-0.017	-0.0524	100.077	101.98	63.1087	0.626799
355	K9_L8C1	0.0307	22.1494	52.6429	0.6729	0.6921	0.0157	-0.006	0.1726	22.0888	1.1756	-0.0124	-0.0678	99.6408	103.98	63.2145	0.629083
355	K9_L8C1	0.0142	22.144	53.0909	0.6941	0.7262	0.021	0.0079	0.137	22.2356	1.2911	-0.017	-0.0462	100.362	105.98	63.0166	0.626393
355	K9_L8C1	0.0106	22.1953	52.6866	0.7023	0.7598	0.0577	0.0099	0.0876	22.2048	1.1634	-0.0418	-0.0062	99.878	107.98	63.0582	0.62853
355	K9_L8C1	0.0377	22.1158	53.2658	0.665	0.6792	0.0315	0.0238	0.1342	22.2017	1.1634	0.0327	0.0154	100.366	109.98	63.0817	0.627723
355	K9_L8C1	0.0248	22.213	53.1447	0.6559	0.6471	-0.0315	0.0338	0.1123	22.1842	1.2407	0.0046	-0.0493	100.261	111.98	63.243	0.62814
355	K9_L8C1	0.0236	22.2062	53.2855	0.6562	0.6944	0.0052	-0.0139	0.0767	22.2956	1.3999	-0.0085	-0.0986	100.643	113.98	63.0626	0.625364
355	K9_L8C1	0.0083	22.124	53.0968	0.6824	0.6267	0.021	-0.0099	0.0575	22.2279	1.1611	-0.0294	0.0339	100.04	115.98	63.1318	0.627571
355	K9_L8C1	0.0307	22.2056	53.1994	0.7585	0.6532	0	-0.006	0.0849	22.2916	1.3378	-0.0046	-0.037	100.562	117.98	63.119	0.626019
355	K9_L8C1	0.0083	22.1551	53.3597	0.6438	0.6638	0.0052	0.0238	0.1123	22.059	1.2883	0.0386	-0.0185	100.358	119.98	63.2874	0.628299
355	K9_L8C1	0.013	22.1936	53.1646	0.6477	0.6488	0.0367	-0.0139	0.0986	22.161	1.232	-0.0052	0.0801	100.276	121.98	63.2439	0.628256
355	K9_L8C1	0.013	22.083	52.5715	0.7212	0.6731	-0.0367	0.002	0.1123	22.2198	1.2495	0.0118	0.0462	99.7034	123.98	63.0368	0.626324
355	K9_L8C1	0.0059	22.1326	53.047	0.732	0.7018	0.0262	0.002	0.126	22.1531	1.256	-0.0157	-0.0062	100.183	125.98	63.1192	0.627449
355	K9_L8C1	0.0047	22.1105	53.1335	0.6937	0.6234	-0.042	0.0298	0.1342	22.2035	1.1433	0.0026	-0.0339	100.079	127.98	63.1466	0.627852
355	K9_L8C1	0.0094	22.1683	53.217	0.7318	0.6218	0.0157	-0.0139	0.1616	22.1781	1.2794	-0.002	0.0062	100.389	129.98	63.2351	0.62734
355	K9_L8C1	0.0094	22.2318	53.0434	0.6926	0.6361	-0.0315	0	0.063	22.0206	1.3266	-0.0203	-0.0863	100.023	131.98	63.4426	0.629102
355	K9_L8C1	-0.0106	22.1924	53.1684	0.6456	0.6445	0.0577	-0.0139	0.1287	22.0549	1.338	-0.0105	-0.037	100.23	133.98	63.3557	0.62823
355	K9_L8C1	0.0201	22.1779	52.9988	0.7006	0.6453	0.021	-0.0079	0.1232	22.1912	1.1546	0.0438	-0.077	100.076	135.98	63.2015	0.628572
355	K9_L8C1	0.0224	22.1666	53.4683	0.8103	0.598	0.021	0.0119	0.1096	22.121	1.2347	0.0105	-0.0031	100.574	137.98	63.3221	0.628343
355	K9_L8C1	0.0047	22.1771	52.6411	0.8138	0.6139	0.0315	-0.004	0.0767	22.1641	1.1637	-0.0046	0.0647	99.7512	139.98	63.2687	0.628742
355	K9_L8C1	0.0071	22.1601	52.9294	0.6922	0.6456	0.0052	0.0397	0.0137	22.0449	1.2821	-0.0033	-0.0092	99.8201	141.98	63.3306	0.628556
355	K9_L8C1	0.0177	22.1171	53.4855	0.7561	0.6085	-0.021	-0.002	0.0603	22.168	1.2616	-0.0242	0.0216	100.496	143.98	63.2088	0.62708
355	K9_L8C1	0.0106	22.1368	53.163	0.7121	0.66	0.021	0	0.0521	22.0834	1.2589	-0.0249	-0.0524	100.098	145.98	63.2484	0.62816
355	K9_L8C1	0.0212	22.2424	53.2557	0.6776	0.6713	-0.0263	-0.0298	0.0411	22.2058	1.138	0.0111	0.0247	100.289	147.98	63.2206	0.629271
355	K9_L8C1	0.0165	22.1762	53.4468	0.6836	0.614	0.0315	-0.0119	0.0849	22.3164	1.1847	0.0026	-0.0062	100.557	149.98	63.1138	0.627001
355	K9_L8C1	0.0118	22.1536	53.7304	0.7888	0.675	-0.0053	0	0.1233	22.0504	1.2678	0.0229	0.077	100.901	151.98	63.28	0.628577
355	K9_L8C1	0.0024	22.1714	53.6373	0.6836	0.5539	-0.021	-0.0179	0.0931	22.0978	1.3945	-0.0321	-0.1078	100.634	153.98	63.4081	0.627012
355	K9_L8C1	0.0141	22.2681	53.5311	0.7071	0.5535	0.042	-0.0318	0.0356	22.114	1.2505	0.0177	-0.0401	100.534	155.97	63.493	0.62932
355	K9_L8C1	0.0177	22.1538	53.5546	0.6751	0.6126	0.0263	0.0159	0.0767	22.1356	1.197	-0.0059	0.0092	100.475	157.97	63.2749	0.628444
355	K9_L8C1	0.0236	22.2158	54.0266	0.6548	0.6395	-0.0105	0.004	0.0685	21.977	1.4069	0.0085	0.0555	101.081	159.97	63.4658	0.628557
355	K9_L8C1	0.0012	22.3349	53.349	0.5202	0.5976	0.0158	0.0358	0.0767	22.0101	1.262	-0.0196	-0.037	100.203	161.97	63.6106	0.630939
355	K9_L8C1	-0.0071	22.4197	53.7277	0.4983	0.605	0.0053	-0.0358	0.0329	21.8333	1.2951	-0.0085	-0.0339	100.417	163.97	63.8686	0.633256
355	K9_L8C1	0.0436	22.3618	53.4048	0.3977	0.6333	0	-0.0457	0.0521	21.9938	1.1765	-0.017	-0.0277	100.064	165.97	63.6085	0.63225
355	K9_L8C1	0.0153	22.4287	53.5475	0.3678	0.6695	0	0.0139	0.0356	21.93	1.3417	0.0046	-0.0678	100.355	167.97	63.6953	0.631908
355	K9_L8C1	-0.0094	22.43	53.8316	0.3577	0.5916	0.0315	0.0338	0.0823	21.8867	1.2094	0.0072	0.074	100.536	169.97	63.8422	0.633698
355	K9_L8C1	0.02	22.3985	53.6484	0.371	0.619	0.042	-0.0318	0.074	22.0252	1.2532	-0.017	0	100.451	171.97	63.6332	0.631539
355	K9_L8C1	0.0059	22.3863	53.8929	0.4155	0.6225	0.0158	-0.0239	0.0247	21.837	1.2419	0.0144	0.0555	100.512	173.97	63.8075	0.633414
355	K9_L8C1	0.0071	22.2925	54.0636	0.3144	0.5859	0	0.0119	0.0631	21.8721	1.1855	0.0066	0.0863	100.489	175.97	63.7225	0.63266
355	K9_L8C1	0.0224	22.4012	53.6472	0.3976	0.6142	0.0158	0	0.0713	21.8183	1.4159	-0.017	-0.0986	100.404	177.97	63.8528	0.631988
355	K9_L8C1	0.0377	22.4331	53.7767	0.3232	0.5978	0.021	0.008	0.1234	21.995	1.233	0.002	-0.0709	100.551	179.97	63.7271	0.632405
355	K9_L8C1	-0.0024	22.3344	54.0606	0.3575	0.5647	0.021	-0.0437	0.0055	22.0277	1.2182	0.0269	0.037	100.653	181.97	63.635	0.631202
355	K9_L8C1	0.0083	22.4038	53.8271	0.328	0.6277	0.0105	-0.0179	0.1096	21.9864	1.265	-0.0491	0.1048	100.671	183.97	63.6668	0.631863
355	K9_L8C1	0	22.2868	53.7372	0.394	0.6095	-0.0053	-0.0099	0.1288	21.8861	1.3333	-0.0327	0.0277	100.403	185.97	63.6714	0.630956
355	K9_L8C1	0.0118	22.2927	53.9792	0.4453	0.6445	-0.0053	-0.006	0.0219	22.0864	1.2889	-0.021	-0.0493	100.771	187.97	63.4284	0.629465
355	K9_L8C1	0.0177	22.377	53.8583	0.4074	0.5995	0.0263	0.008	-0.0165	21.9248	1.2655	0.0157	-0.0771	100.5	189.97	63.7384	0.632196
355	K9_L8C1	-0.0012	22.3388	53.2485	0.4228	0.5886	0.0367	0.0318	0.1096	22.2245	1.2998	0.0249	-0.0554	100.326	191.97	63.4091	0.628464
355	K9_L8C1	0.0319	22.3499	53.4649	0.4508	0.6219	0.0052	-0.0079	0.0685	22.1168	1.3442	-0.0563	-0.1047	100.454	193.97	63.4864	0.629202
355	K9_L8C1	0.0083	22.2271	53.3968	0.4572	0.6252	0	0.0338	0.0904	22.1259	1.2262	-0.0046	0.077	100.268	195.97	63.3451	0.629017
355	K9_L8C1	0.0165	22.2909	53.2918	0.4061	0.5666	0.021	-0.004	0.1343	22.1091	1.2294	-0.0177	-0.037	100.066	197.97	63.5047	0.629821
355	K9_L8C1	-0.0047	22.194	53.7628	0.5229	0.6015	0	0.0278	0.1398	22.2186	1.1556	-0.0157	-0.0031	100.623	199.97	63.2473	0.628457
355	K9_L8C1	0.0071	22.2818	53.4721	0.4936	0.5666	0	0.004	0.074	22.1575	1.1936	0.0249	0.0616	100.337	201.97	63.4461	0.629604
355	K9_L8C1	0.0448	22.1671	53.9679	0.4452	0.6032	-0.0053	0.006	0.1014	22.1779	1.2533	0.0065	-0.0247	100.773	203.97	63.2581	0.627593
355	K9_L8C1	0.0153	22.1683	53.7406	0.528	0.6166	-0.0473	0.0179	0.0904	22.2277	1.2325	-0.0255	-0.0154	100.637	205.97	63.1917	0.627319
355	K9_L8C1	-0.0059	22.1815	53.7369	0.5113	0.5589	0.0315	0.0179	0.1343	22.0652	1.2151	-0.0144	0.0031	100.456	207.97	63.4453	0.629257
355	K9_L9C2	1.0962	17.4777	54.9192	2.0227	0.7124	-0.0419	0.7843	0.1482	21.838	1.0965	0.0249	-0.0308	100.12	0	57.7953	0.57584
355	K9_L9C2	0.0321	21.5896	53.0285	0.7317	0.7762	-0.0262	0.0099	0.1313	22.8162	1.3136	0.0131	-0.0277	100.442	2.02	61.7778	0.614464
355	K9_L9C2	-0.0024	21.6254	52.5162	0.7536	0.7271	0	0	0.1094	22.5001	1.4464	0.0039	-0.0154	99.6822	4.04	62.1949	0.616642
355	K9_L9C2	0.0095	21.8454	53.3672	0.6454	0.7542	-0.0419	0.0179	0.1779	22.4798	1.3258	-0.0261	-0.0955	100.623	6.06	62.4181	0.620437
355	K9_L9C2	0.0225	21.9192	52.9735	0.5961	0.7393	0.0577	-0.0119	0.1807	22.2921	1.3469	-0.0183	-0.0031	100.128	8.08	62.7046	0.622878
355	K9_L9C2	0.0201	21.8954	53.0454	0.6409	0.7229	0.0052	0.006	0.0657	22.4021	1.2464	-0.0412	0.037	100.087	10.1	62.5898	0.622541
355	K9_L9C2	-0.013	21.7457	52.8448	0.6459	0.7843	0.0157	-0.0119	0.1287	22.5268	1.2194	0.0144	-0.0647	99.9258	12.12	62.2252	0.619961
355	K9_L9C2	0.0438	21.7193	53.0602	0.6635	0.8713	-0.021	0.0079	0.0356	22.5973	1.1514	0.0124	0.0185	100.181	14.14	62.0153	0.619659
355	K9_L9C2	0	21.5884	52.5902	0.9097	1.0086	0.0314	-0.0119	0.0986	22.5919	1.1513	0.0091	0.0031	99.9824	16.16	61.7037	0.618288
355	K9_L9C2	0.0248	21.6243	52.4104	1.0054	1.0926	0.0524	-0.0079	0.1479	22.315	1.0276	0.0013	0.0739	99.7756	18.18	61.9108	0.622699
355	K9_L9C2	0.0059	21.725	52.5901	1.0965	1.1193	-0.0052	0.002	0.1755	22.2274	1.0667	0.0033	-0.0739	100.012	20.2	62.0734	0.624273
355	K9_L9C2	0.0071	21.6243	52.6607	1.2073	1.211	0.0105	-0.0159	0.1261	22.1022	1.1464	-0.019	0.0277	100.123	22.22	61.9716	0.623631
355	K9_L9C2	0.0224	22.1412	53.3934	0.7328	0.9159	-0.0367	-0.0199	0.1234	22.1233	1.0287	-0.0118	-0.0493	100.481	24.24	62.8824	0.630145
355	K9_L9C2	0.0142	22.1693	53.3615	0.6389	0.8325	-0.0577	0.004	0.1206	22.3091	1.0491	-0.0373	-0.0123	100.499	26.26	62.833	0.628371
355	K9_L9C2	0.013	21.775	53.1593	0.7424	0.915	-0.021	-0.0476	0.1288	22.4153	1.146	-0.019	0.0154	100.31	28.28	62.201	0.622126
355	K9_L9C2	0.039	21.6701	52.4406	0.8209	0.9765	0.021	-0.0198	0.1178	22.1722	1.2789	0.0033	-0.04	99.5403	30.31	62.2518	0.622075
355	K9_L9C2	0.0118	21.921	53.3182	0.6538	0.7946	0.0157	0.0139	0.0383	22.5231	1.305	0.0314	-0.0462	100.627	32.33	62.4043	0.621031
355	K9_L9C2	0.0012	21.9238	53.0765	0.6374	0.7795	0.0052	0.004	0.1122	22.4541	1.3139	0.0203	-0.0123	100.328	34.35	62.4954	0.621654
355	K9_L9C2	0.0024	21.8012	53.091	0.7278	0.9586	0.0262	0.0337	0.1096	22.3668	1.1461	0.0183	-0.0647	100.282	36.37	62.222	0.622891
355	K9_L9C2	0	22.0299	52.8983	0.6032	0.779	-0.0157	0.006	0.0685	22.4364	1.134	0.0131	-0.0493	99.9683	38.39	62.6268	0.624769
355	K9_L9C2	-0.0083	21.9935	52.5904	0.7228	0.661	0.0105	-0.0218	0.0328	22.5348	1.1927	0.0144	-0.0154	99.7529	40.41	62.6409	0.622816
355	K9_L9C2	0.0213	21.8942	53.4498	0.7393	0.6634	-0.0105	0.004	0.1232	22.5478	1.1427	0.0281	0.0123	100.626	42.43	62.5188	0.622125
355	K9_L9C2	0.0284	22.0489	53.2709	0.6872	0.7742	-0.0052	0.0258	0.1095	22.4359	1.1663	0.0163	-0.1293	100.564	44.45	62.6536	0.624651
355	K9_L9C2	0.0249	21.9914	52.9037	0.6843	0.6713	0.0629	-0.0258	0.063	22.5022	1.1276	0.0183	-0.1201	100.05	46.47	62.6581	0.62377
355	K9_L9C2	0.0071	22.032	52.6524	0.6084	0.6624	0.0315	0.002	0.1259	22.3969	1.2989	0.0163	0.0616	99.8953	48.49	62.8183	0.623527
355	K9_L9C2	0	21.9804	53.098	0.6657	0.7519	0.021	-0.006	0.1314	22.4136	1.3555	-0.0072	-0.0246	100.418	50.51	62.6317	0.622244
355	K9_L9C2	0.0308	22.0781	52.643	0.6629	0.7753	-0.0314	0.006	0.1971	22.3207	1.3109	-0.0307	0.0277	100.052	52.53	62.7984	0.624651
355	K9_L9C2	-0.0071	21.9789	53.0167	0.6376	0.7875	0.0105	-0.0238	0.1205	22.4804	1.2876	0.0131	-0.0031	100.333	54.55	62.5178	0.622247
355	K9_L9C2	-0.0107	21.9231	52.8477	0.7172	0.7897	-0.0262	0.0119	0.1095	22.5009	1.2962	0.0562	0.0277	100.28	56.57	62.4349	0.621361
355	K9_L9C2	0.0295	21.9682	52.8307	0.7949	0.7459	-0.0052	0.0218	0.0548	22.3028	1.2169	0.0163	-0.0216	99.982	58.59	62.7376	0.624605
355	K9_L9C2	0.0059	21.9988	53.0221	0.6907	0.6953	0.0052	-0.0199	0.0767	22.3933	1.1134	-0.0124	-0.0862	100.001	60.61	62.7443	0.625074
355	K9_L9C2	0.0047	21.9315	52.908	0.7053	0.7037	-0.0052	0.006	0.0712	22.3763	1.2017	0.0098	-0.0246	99.9181	62.63	62.6789	0.623635
355	K9_L9C2	0.0071	21.9942	53.0684	0.8145	0.6445	0.0629	0.002	0.1095	22.4729	1.1723	0.0686	0.0185	100.435	64.65	62.7249	0.623641
355	K9_L9C2	0.0354	22.0325	52.9673	0.689	0.6549	-0.042	-0.0079	0.1123	22.3375	1.1668	-0.0275	-0.0062	99.9958	66.67	62.8882	0.62545
355	K9_L9C2	-0.0165	22.2017	52.9506	0.6531	0.658	-0.0105	0.004	0.1095	22.3747	1.1813	0.0007	-0.0462	100.134	68.69	63.0252	0.626725
355	K9_L9C2	0.0236	22.0733	53.3216	0.7383	0.6273	-0.0105	0.0119	0.0548	22.4386	1.1253	0.0039	0.0216	100.44	70.71	62.8653	0.625296
355	K9_L9C2	-0.0036	22.0456	52.7783	0.7543	0.6176	0.0315	0.0119	0.0383	22.5263	1.2461	0.049	0.0154	100.114	72.73	62.7604	0.622921
355	K9_L9C2	0.0319	22.1589	52.905	0.7825	0.6057	0.0157	0.002	0.052	22.5005	1.3405	-0.0131	0.0092	100.404	74.75	62.9213	0.623436
355	K9_L9C2	0.0083	22.0327	53.0426	0.7816	0.6355	-0.0262	-0.0218	0.1067	22.3376	1.4406	0.0105	-0.0739	100.396	76.77	62.9134	0.622701
355	K9_L9C2	0.0319	22.0143	53.0836	0.8708	0.6463	0.0052	-0.0238	0.0767	22.3454	1.2022	-0.0013	0.0493	100.326	78.79	62.8721	0.624821
355	K9_L9C2	-0.0177	22.0689	52.6654	0.7541	0.6389	-0.0052	-0.0099	0.0684	22.2691	1.2904	-0.0229	0.0493	99.8044	80.81	63.0164	0.625272
355	K9_L9C2	0.026	22.131	53.1739	0.7238	0.7233	-0.0367	-0.0198	0.1533	22.3011	1.4764	-0.0046	-0.0893	100.709	82.83	62.9408	0.623749
355	K9_L9C2	0.0508	22.0216	53.6822	0.7162	0.6345	-0.021	-0.0199	0.0438	22.4367	1.1786	-0.0281	-0.0062	100.764	84.85	62.8032	0.624229
355	K9_L9C2	-0.0012	21.9723	53.0563	0.7301	0.5656	0.0315	-0.0338	0.1287	22.2492	1.2347	-0.0026	0.0585	100.027	86.87	63.0293	0.625004
355	K9_L9C2	0.0354	22.1417	53.4154	0.6704	0.6044	0.021	-0.0099	0.0904	22.248	1.2762	0.0373	-0.0154	100.54	88.89	63.159	0.626396
355	K9_L9C2	0.0071	22.1115	53.3767	0.6902	0.6149	0.0367	0.0199	0.074	22.1537	1.2322	-0.0275	0.0277	100.345	90.91	63.2091	0.62746
355	K9_L9C2	0.0248	22.0068	53.1523	0.8891	0.5995	-0.0052	-0.0397	0.104	22.4321	1.2758	-0.0039	-0.0524	100.484	92.93	62.8372	0.623141
355	K9_L9C2	0.039	21.9831	53.1746	0.7648	0.6136	-0.0157	-0.0099	0.1177	22.4038	1.3318	-0.0013	0.0092	100.438	94.96	62.8223	0.622607
355	K9_L9C2	0.0095	21.9604	52.5879	0.8299	0.5992	0.0577	-0.0337	0.0164	22.3365	1.2927	0.0033	-0.0616	99.6934	96.98	62.8847	0.623423
355	K9_L9C2	0.0485	22.1769	52.954	0.6646	0.6056	0.0105	-0.0218	0.167	22.3619	1.2518	0.0229	-0.0739	100.264	99	63.0796	0.625883
355	K9_L9C2	-0.0035	22.0128	53.4167	0.6996	0.5896	0.0158	0.0437	0.1069	22.1507	1.0668	0.0092	-0.0062	100.112	101.02	63.1409	0.628124
355	K9_L9C2	0.0142	22.1796	53.6424	0.6985	0.5801	-0.021	-0.0079	0.0384	22.2648	1.1937	-0.0046	0.0678	100.679	103.04	63.2133	0.62746
355	K9_L9C2	0.0083	22.1555	53.4249	0.7432	0.6018	-0.042	-0.0318	0.0931	22.4023	1.3052	0.0203	0.0216	100.776	105.06	63.0213	0.624721
355	K9_L9C2	0.0024	22.1285	53.1416	0.7154	0.613	0.042	0.002	0.0383	22.3656	1.1782	0.0007	-0.0493	100.228	107.08	63.0154	0.626074
355	K9_L9C2	0.0378	21.992	53.3757	0.7711	0.6083	-0.0472	0.0159	0.0794	22.4411	1.1371	0.0007	0.0308	100.49	109.1	62.8011	0.624287
355	K9_L9C2	0.0319	21.9556	53.5229	0.7989	0.6052	0	0.0218	0.0055	22.294	1.2878	-0.0281	0.0431	100.567	111.12	62.9148	0.623844
355	K9_L9C2	0.0118	22.0804	52.8489	0.8367	0.5962	-0.0157	-0.004	0.0876	22.359	1.2755	-0.0052	0.0647	100.161	113.14	62.993	0.624652
355	K9_L9C2	0.0485	22.0143	52.9289	0.8033	0.6079	-0.0052	0.0218	0.0575	22.4295	1.3314	0.0183	-0.0154	100.261	115.16	62.8369	0.62269
355	K9_L9C2	0.0106	22.1831	53.277	0.8677	0.5797	-0.0105	0.0179	0.1177	22.3627	1.2788	0.0229	-0.0554	100.718	117.18	63.1187	0.625669
355	K9_L9C2	0.0284	21.9049	53.3929	0.8073	0.6415	0.0052	0.002	0.1287	22.318	1.1754	-0.032	0.1016	100.506	119.2	62.7896	0.624196
355	K9_L9C2	0.0272	21.9946	53.0351	0.8775	0.5687	0.0472	-0.0079	0.0794	22.3218	1.2284	0.0052	-0.0924	100.185	121.22	62.9754	0.624582
355	K9_L9C2	0.0295	22.1156	53.6087	0.7348	0.5902	-0.0263	0.006	0.0383	22.4387	1.2171	0.0118	0.0031	100.794	123.24	62.9576	0.624821
355	K9_L9C2	0.0236	22.1685	52.7895	0.7044	0.6403	0.0262	0.0079	0.115	22.2987	1.3404	-0.0111	-0.0339	100.115	125.26	63.0896	0.625531
355	K9_L9C2	0.0024	22.2537	53.6587	0.7313	0.5634	-0.0053	0.006	0.0904	22.1888	1.2202	0.0105	-0.0277	100.725	127.28	63.3893	0.628729
355	K9_L9C2	0.0177	22.2357	53.3503	0.5895	0.5903	0	0	0.1178	22.1218	1.1878	0.002	0.0308	100.244	129.3	63.4035	0.629536
355	K9_L9C2	0.0424	22.2347	53.8431	0.5923	0.5628	-0.0105	0.0219	0.0987	22.1597	1.1438	-0.0321	0.0062	100.705	131.32	63.3998	0.629593
355	K9_L9C2	0.02	22.181	53.6087	0.5843	0.5739	0.021	0.0099	0.0384	22.1235	1.197	-0.0092	0.0247	100.382	133.34	63.3659	0.628852
355	K9_L9C2	0.0212	22.1276	53.4337	0.6357	0.5658	0.0053	0.0199	0.0877	22.2103	1.2026	0.0445	0	100.354	135.36	63.2324	0.627365
355	K9_L9C2	-0.0165	22.1955	53.7408	0.6832	0.6085	0.0315	-0.0358	0.1398	22.1948	1.1997	0.0046	0.0493	100.848	137.38	63.2639	0.628265
355	K9_L9C2	0.0189	22.1999	53.1808	0.5864	0.5995	0.042	0.0159	0.063	22.3326	1.2521	-0.0059	0.0185	100.309	139.4	63.1411	0.626413
355	K9_L9C2	0.0307	22.1368	53.5992	0.6303	0.6092	0	-0.0258	0.1671	22.1256	1.1611	0.0347	0.0524	100.547	141.42	63.2716	0.628729
355	K9_L9C2	0.0083	22.1722	53.4945	0.6453	0.6243	0.0105	0.0139	0.1315	22.1474	1.0992	0.038	-0.0246	100.385	143.44	63.267	0.629512
355	K9_L9C2	0.0212	22.2219	53.4157	0.6473	0.5641	0.0577	-0.0159	0.1205	22.2091	1.2616	0.0124	-0.0092	100.532	145.46	63.3346	0.627775
355	K9_L9C2	0.0271	22.2395	53.7266	0.6685	0.5887	0.0105	0.0219	0.0794	22.1594	1.2615	-0.019	0.0554	100.839	147.48	63.3714	0.628456
355	K9_L9C2	0.0083	22.1359	53.467	0.6242	0.6121	-0.0262	-0.0079	0.0575	22.3365	1.3258	-0.0209	0.0862	100.653	149.51	63.0536	0.624958
355	K9_L9C2	0.0248	22.135	53.2431	0.6093	0.6266	0.0315	0.0318	0.0959	22.0783	1.2675	-0.0111	-0.0493	100.144	151.53	63.2951	0.628105
355	K9_L9C2	0.0035	22.1882	52.9849	0.6693	0.7135	0.0315	-0.004	0.0438	22.1594	1.3145	-0.0078	-0.0462	100.109	153.55	63.1562	0.627382
355	K9_L9C2	-0.0012	22.2865	53.4653	0.6291	0.6489	0.0315	0.0079	0.0575	22.0588	1.2441	-0.0072	0.0647	100.494	155.57	63.4442	0.630128
355	K9_L9C2	0.0071	22.1582	53.7197	0.7065	0.625	-0.0157	-0.002	0.0849	22.3195	1.2379	0.0085	0.0308	100.898	157.59	63.0776	0.626245
355	K9_L9C2	0.0047	22.1359	53.5306	0.6586	0.6724	0.0105	0.0338	0.0822	22.2496	1.2672	0.0235	0.0493	100.718	159.61	63.0634	0.626409
355	K9_L9C2	0.0012	22.1953	53.5416	0.6538	0.6496	-0.0158	-0.0079	-0.0055	22.2246	1.232	-0.0203	-0.0554	100.498	161.63	63.1804	0.62764
355	K9_L9C2	0.0047	22.2974	53.4271	0.5216	0.673	-0.0157	0.0159	0.0767	22.3098	1.2137	0.0163	0.0031	100.559	163.65	63.1713	0.628049
355	K9_L9C2	0.0142	22.307	53.8223	0.394	0.6455	0.0157	0.006	0.063	22.1971	1.2435	-0.0445	0.0801	100.788	165.67	63.3301	0.62897
355	K9_L9C2	0.0177	22.2332	53.5644	0.4997	0.6248	-0.0052	-0.006	0.0438	22.1176	1.2522	-0.0432	0.0062	100.36	167.69	63.3603	0.628901
355	K9_L9C2	0.046	22.1875	53.2295	0.4902	0.6596	0.0157	-0.004	0.1013	22.1751	1.2552	0.0059	-0.0216	100.166	169.71	63.2093	0.627816
355	K9_L9C2	0.0165	22.2488	53.1241	0.4919	0.6444	0.042	-0.0199	0.1314	22.0597	1.3113	-0.0477	-0.0185	100.07	171.73	63.4099	0.629045
355	K9_L9C2	-0.0177	22.3097	53.1325	0.479	0.6011	0.021	0.0218	0.0685	22.0453	1.4444	0.0144	-0.0308	100.138	173.75	63.5441	0.628484
355	K9_L9C2	0.0248	22.1892	53.1181	0.7552	0.6863	0.021	0.0198	0.1478	22.3092	1.3171	-0.0072	0.0369	100.626	175.77	63.0415	0.625879
355	K9_L9C2	0.0177	22.1672	52.7734	0.6927	0.6678	-0.0367	0.0159	0.1204	22.306	1.4199	0.0144	0.0246	100.22	177.79	63.0454	0.624649
355	K9_L9C2	0.0154	22.0747	53.2718	0.7382	0.5947	0.0105	0.0457	0.0958	22.3081	1.261	-0.0314	0.0462	100.462	179.81	63.0403	0.625242
355	K9_L9C2	0.0142	22.0705	53.0849	0.7401	0.6534	0.0052	0.0397	0.0794	22.2493	1.2081	0.0157	0.04	100.201	181.83	63.0193	0.626316
355	K9_L9C2	0.033	22.1322	53.2503	0.8754	0.586	-0.0472	-0.006	0.1588	22.2829	1.1665	-0.0065	0.077	100.562	183.85	63.1376	0.627054
355	K9_L9C2	0.0035	22.117	52.5096	0.8073	0.596	0.0367	0	0.1204	22.4551	1.228	0.002	-0.0031	99.8756	185.87	62.9352	0.624565
355	K9_L9C2	0.0248	22.1607	53.4977	0.7595	0.5844	0.0472	0.0179	0.1013	22.4009	1.2196	-0.015	-0.0185	100.814	187.89	63.0506	0.625648
355	K9_L9C2	-0.0059	22.12	53.4088	0.7281	0.598	0	-0.0079	0.1041	22.2793	1.0868	-0.0111	0.0585	100.384	189.92	63.1128	0.627767
355	K9_L9C3	1.8615	7.2313	65.7215	6.7124	0.7344	0.1012	1.8347	0.5161	13.4137	0.3934	0.0387	-0.1086	98.559	0	47.3125	0.482736
355	K9_L9C3	0.3241	14.9018	52.3821	2.6239	2.8097	1.8245	0.5653	0.3445	24.577	0.7266	0.0156	0.0583	101.153	2.25	48.5263	0.512051
355	K9_L9C3	0.0466	24.0344	53.5339	1.7792	1.5416	0.0211	0.0259	0.3602	17.9469	0.7566	0.0213	0.0495	100.117	4.14	68.2592	0.695996
355	K9_L9C3	0.0203	24.5097	53.4713	2.4935	1.6781	0.0317	0.006	0.3277	17.4507	0.4983	0.0007	0.0155	100.503	6.11	69.0307	0.70873
355	K9_L9C3	0.0181	24.7039	52.9877	2.4874	1.5907	0.0475	0	0.2915	17.2779	0.6443	-0.014	0.0526	100.102	8.1	69.5102	0.710643
355	K9_L9C3	-0.0023	24.5434	52.8606	2.2798	1.5065	0	-0.03	0.3605	17.6834	0.6199	0.054	-0.034	99.9081	10.1	69.046	0.704949
355	K9_L9C3	0.0295	24.2314	52.3827	2.7388	1.6232	0	0.0279	0.3242	18.0591	0.7028	-0.016	-0.0155	100.12	12.1	68.2016	0.697071
355	K9_L9C3	0.0438	25.1552	53.127	2.9091	1.707	-0.0106	-0.03	0.3059	16.8758	0.5705	0.0388	-0.0217	100.733	14.11	70.1693	0.719819
355	K9_L9C3	0.0541	24.7573	53.1233	2.8914	1.7579	0.0106	0.004	0.2501	17.2352	0.5552	0.0267	0.0867	100.752	16.11	69.3684	0.712613
355	K9_L9C3	0.0466	24.3171	52.9435	2.4852	1.5713	-0.0158	-0.016	0.3492	18.0708	0.6852	-0.0446	-0.0309	100.469	18.12	68.3371	0.697885
355	K9_L9C3	0.0149	23.9111	53.3484	1.925	1.3505	0.0527	-0.002	0.2546	18.6589	0.6934	-0.014	0.0742	100.284	20.13	67.6424	0.687642
355	K9_L9C3	0.0295	22.0338	52.829	0.8034	0.7834	-0.042	0.006	0.1151	22.2665	1.1288	-0.0118	0.0277	100.023	22.13	62.7955	0.626556
355	K9_L9C3	0.0214	21.6347	53.0019	0.7202	0.6071	0.0157	0.004	0.093	22.6999	1.2368	-0.0346	-0.0339	100.035	24.14	62.1588	0.616867
355	K9_L9C3	0.0332	21.6363	53.3654	0.7164	0.7018	0.0524	0	0.1368	22.7443	1.3162	0.0379	0.1201	100.861	26.15	61.9949	0.615655
355	K9_L9C3	-0.0404	21.7513	52.8988	0.6165	0.6662	0.0052	0.0079	0.1039	22.7943	1.3427	0.0078	0.0493	100.244	28.16	62.1154	0.616156
355	K9_L9C3	0.0249	21.7199	53.0125	0.6076	0.6956	0.0839	-0.0159	0.1122	22.6631	1.2929	0.0111	0.0154	100.239	30.17	62.1746	0.617598
355	K9_L9C3	0.0142	21.5984	52.9655	0.6174	0.6985	0.0472	-0.0218	0.1012	22.7853	1.2422	-0.0091	0.0369	100.107	32.18	61.917	0.615574
355	K9_L9C3	-0.0036	21.8004	52.6434	0.6677	0.7021	0.0157	0.0119	0.115	22.5156	1.2165	0.0013	-0.0216	99.6897	34.19	62.4008	0.620693
355	K9_L9C3	0.0368	21.6884	53.0545	0.6176	0.6608	0.0472	0.004	0.0766	22.6965	1.2485	-0.0202	0.0554	100.186	36.2	62.1517	0.61737
355	K9_L9C3	0.013	21.6229	53.3417	0.7241	0.7321	0.0629	0.0139	0.1232	22.5361	1.3435	-0.0301	-0.0123	100.513	38.21	62.1496	0.617289
355	K9_L9C3	0.0118	21.8044	53.0761	0.7034	0.6681	-0.0891	0.0199	0.1643	22.5316	1.1693	0.0327	-0.0431	100.181	40.22	62.4327	0.621052
355	K9_L9C3	0.013	21.8708	52.9025	0.7286	0.7003	0.0157	0	0.1615	22.5639	1.2163	0.0137	0.0185	100.205	42.22	62.4304	0.620976
355	K9_L9C3	0	21.8563	53.6226	0.7127	0.6975	-0.0157	0.0119	0.0904	22.4059	1.2993	0.0118	-0.0893	100.708	44.23	62.5768	0.621552
355	K9_L9C3	-0.0024	21.8428	52.8041	0.7915	0.72	0.0419	-0.0079	0.0602	22.5643	1.4168	0.0052	0.0031	100.25	46.24	62.3747	0.618668
355	K9_L9C3	-0.0047	21.8181	52.8838	0.6639	0.7036	0.0262	-0.0119	0.0821	22.3958	1.3198	-0.0098	0.0092	99.9025	48.25	62.5381	0.621035
355	K9_L9C3	-0.0035	21.9195	53.1412	0.7665	0.6034	0.0367	-0.002	0.1561	22.2799	1.2935	0.002	0.1139	100.313	50.26	62.893	0.62354
355	K9_L9C3	0.0154	21.9016	53.0487	0.7431	0.6786	0.042	0.0139	0.0301	22.3516	1.1427	-0.0405	-0.0585	99.9676	52.27	62.7042	0.624156
355	K9_L9C3	0.0024	21.9698	53.1941	0.7332	0.6736	-0.0315	0.0119	0.1451	22.4341	1.2607	0.0007	0.0462	100.472	54.28	62.7004	0.622877
355	K9_L9C3	0.0142	21.962	53.1715	0.7399	0.6765	0.0315	-0.0198	0.1149	22.5225	1.3016	-0.0111	0.0554	100.59	56.29	62.5998	0.62151
355	K9_L9C3	0.0449	21.9847	52.8344	0.7437	0.7188	-0.0367	0.0258	0.0767	22.293	1.3586	-0.0026	0.0216	100.102	58.3	62.7999	0.623452
355	K9_L9C3	0.0024	21.9595	52.9147	0.7419	0.6446	-0.021	0.0119	0.0986	22.3949	1.1725	-0.019	-0.0031	99.941	60.34	62.7662	0.624043
355	K9_L9C3	0.0177	21.8923	53.1721	0.7414	0.7703	-0.0105	0.002	0.0931	22.4607	1.2287	0.0046	-0.0031	100.383	62.35	62.4669	0.622105
355	K9_L9C3	0.0142	21.9769	52.8703	0.7386	0.6801	0.0525	-0.0139	0.063	22.3511	1.2225	0.0353	-0.0462	100.004	64.35	62.783	0.624161
355	K9_L9C3	-0.0035	21.8682	53.1199	0.7842	0.6697	0.021	-0.0337	0.167	22.309	1.2046	0.0072	0.1139	100.265	66.36	62.723	0.623598
355	K9_L9C3	0.0059	21.9114	53.7128	0.8083	0.7158	-0.0052	0.0139	0.1424	22.255	1.2849	-0.0196	-0.1201	100.85	68.37	62.764	0.623788
355	K9_L9C3	0.0071	21.9049	53.1412	0.8108	0.6744	0.042	0.002	0.1095	22.3696	1.2784	0.0124	0.0647	100.417	70.38	62.695	0.622644
355	K9_L9C3	0.0201	21.894	53.3621	0.827	0.6763	-0.0682	-0.0318	0.1232	22.4077	1.1783	-0.0007	0.0801	100.569	72.39	62.6426	0.623156
355	K9_L9C3	0.0154	21.8739	52.8751	0.9301	0.6632	-0.021	-0.004	0.1971	22.3733	1.3169	-0.0131	-0.0308	100.245	74.4	62.6726	0.621888
355	K9_L9C3	0.0154	21.8019	52.7695	0.8475	0.71	-0.021	0.0476	0.104	22.3801	1.2223	0.0072	0.0585	99.964	76.41	62.5282	0.621997
355	K9_L9C3	0.0343	21.8795	52.8893	0.8362	0.7131	0.0262	0.0357	0.0958	22.4933	1.2664	0.0222	0.0677	100.36	78.42	62.4939	0.621266
355	K9_L9C3	0.0283	21.9401	53.5336	0.9091	0.7126	0.0315	0.0179	0.1178	22.3935	1.1844	0.0334	-0.0031	100.902	80.43	62.6594	0.62373
355	K9_L9C3	-0.0118	21.8835	53.6987	0.9269	0.7096	0.0052	-0.0576	0.1562	22.3908	1.1521	0.0236	0.0493	100.996	82.44	62.6055	0.623476
355	K9_L9C3	0.0083	21.8979	53.265	0.8189	0.6471	-0.0105	-0.0079	0.063	22.2777	1.2938	-0.0046	0.04	100.312	84.45	62.8156	0.623328
355	K9_L9C3	-0.0165	21.8734	53.4648	0.6847	0.6937	0.021	0	0.1068	22.3506	1.1844	0.0059	-0.0431	100.385	86.46	62.6556	0.623442
355	K9_L9C3	0.0355	21.9738	52.9389	0.8066	0.7179	0.0472	0.0357	0.052	22.4964	1.2665	0.002	-0.0801	100.372	88.47	62.5854	0.622246
355	K9_L9C3	0.0177	21.9857	53.5128	0.807	0.673	0.0315	0.0119	0.1315	22.4192	1.1902	-0.017	-0.0123	100.781	90.48	62.7331	0.623903
355	K9_L9C3	0.0343	22.0615	53.1647	0.7349	0.6698	0.0105	-0.0437	0.0821	22.2733	1.2725	-0.0098	0.077	100.38	92.49	62.9644	0.625332
355	K9_L9C3	-0.0094	22.0013	53.1907	0.7759	0.6931	-0.0577	-0.0159	0.0493	22.1866	1.2438	0.0072	0.0123	100.16	94.5	62.958	0.625846
355	K9_L9C3	0.0012	22.0644	52.821	0.6708	0.6975	0.0052	-0.0238	0.0986	22.218	1.2463	0.0046	-0.0092	99.8275	96.51	62.9874	0.626178
355	K9_L9C3	0.0071	22.0778	52.7955	0.7373	0.6656	0	-0.002	0.1588	22.269	1.2872	0.0222	-0.1047	100.02	98.52	62.9913	0.6254
355	K9_L9C3	0.0154	22.0317	53.0698	0.7383	0.7101	0.0157	0.004	0.0876	22.292	1.2846	-0.0078	-0.0246	100.249	100.53	62.862	0.624707
355	K9_L9C3	-0.0165	22.0204	53.6845	0.6961	0.6837	-0.0052	-0.0556	0.0329	22.2722	1.1936	0.0105	0.0277	100.622	102.53	62.904	0.625702
355	K9_L9C3	0.0118	22.0649	53.0646	0.8487	0.6644	0.0367	0	0.0493	22.1043	1.2613	-0.0007	-0.0062	100.106	104.54	63.1458	0.627166
355	K9_L9C3	0.0024	21.998	52.7974	0.8308	0.7296	-0.0052	0.0099	0.1916	22.1443	1.3466	0.017	-0.0154	100.067	106.55	62.95	0.625194
355	K9_L9C3	-0.0118	22.004	53.0446	0.7184	0.6935	0.0105	0.0079	0.1342	22.2609	1.2492	0.0007	-0.04	100.124	108.56	62.8854	0.625079
355	K9_L9C3	0.0413	22.0855	52.5506	0.7771	0.7322	0.0157	0.0298	0.1013	22.2237	1.2285	-0.0105	0.0062	99.792	110.57	62.9591	0.626524
355	K9_L9C3	0.0035	22.046	53.4421	0.7559	0.6686	0.0157	0	0.0575	22.1708	1.1403	0.034	0.077	100.412	112.58	63.053	0.627527
355	K9_L9C3	0.0318	22.0392	52.9651	0.7909	0.6905	0.0105	0.0238	0.1616	22.0922	1.1461	-0.002	-0.0216	99.9519	114.59	63.097	0.628185
355	K9_L9C3	-0.0059	22.1189	53.371	0.723	0.7094	-0.0367	0	0.1013	22.1663	1.3321	-0.0065	0.0308	100.553	116.6	63.0817	0.626404
355	K9_L9C3	0.0071	22.1548	53.4619	0.6817	0.6826	0.021	0.0079	0.1534	22.2234	1.2496	0.0164	0.0062	100.666	118.61	63.0965	0.627047
355	K9_L9C3	0.0177	22.079	53.6939	0.6664	0.7351	0.0367	0.002	0.1288	22.1741	1.2175	0.0203	0.0154	100.787	120.64	62.9985	0.627061
355	K9_L9C3	-0.0071	22.0792	53.5858	0.6864	0.7043	0.0262	0.004	0.1206	21.9647	1.253	-0.0105	0.114	100.538	122.65	63.2507	0.628801
355	K9_L9C3	0.0247	22.2094	53.1775	0.6621	0.702	-0.0262	0.0238	0.0548	22.0905	1.0786	-0.0026	0.0062	100.03	124.66	63.2628	0.630683
355	K9_L9C3	0.0295	22.1688	53.6542	0.6401	0.7517	0.0262	0.006	0.1179	22.165	1.1376	0.0216	0.0431	100.762	126.67	63.0808	0.62891
355	K9_L9C3	0.0094	22.2449	53.5019	0.6126	0.7421	-0.0052	-0.0457	0.1069	22.2561	1.223	0.0294	0.0832	100.809	128.68	63.0814	0.627938
355	K9_L9C3	0.0059	22.2041	53.4748	0.6139	0.7238	0.0052	0.0139	0.0794	22.0513	1.2969	0.0072	0.04	100.516	130.69	63.2687	0.628805
355	K9_L9C3	0.0177	22.1238	53.6715	0.6994	0.7334	-0.0315	0.0298	0.0822	22.1723	1.1876	0.0052	-0.0493	100.723	132.7	63.0498	0.627856
355	K9_L9C3	0.0024	22.1121	53.5657	0.6252	0.7037	0.0105	0.0358	0.1343	22.0384	1.1172	0.0007	-0.0555	100.346	134.71	63.2113	0.62979
355	K9_L9C3	-0.0165	22.2299	52.7449	0.7372	0.76	-0.0629	-0.0278	0.1013	22.1489	1.2465	-0.0334	0.0154	99.9841	136.72	63.1504	0.628611
355	K9_L9C3	-0.0024	22.2652	53.5626	0.7065	0.7024	0.0105	0.0139	0.1205	22.1418	1.3412	-0.0177	-0.0185	100.865	138.73	63.2688	0.628098
355	K9_L9C3	0.013	22.2207	53.1295	0.758	0.7287	-0.0315	-0.0199	0.1836	22.0419	1.1495	0.0124	-0.0154	100.237	140.74	63.2892	0.630568
355	K9_L9C3	0.0271	22.1277	53.289	0.6734	0.7406	0.0472	0.006	0.0822	22.0816	1.1967	-0.0026	0.0246	100.296	142.75	63.1361	0.628713
355	K9_L9C3	-0.0059	22.2418	53.0982	0.6326	0.7039	0.0262	-0.0119	0.1013	22.0871	1.2701	0.0235	-0.0277	100.185	144.76	63.2977	0.629114
355	K9_L9C3	0.0035	22.3773	52.8602	0.6614	0.7206	0.0367	-0.0298	0.0657	22.0207	1.2642	0.0432	-0.0985	100.054	146.77	63.4841	0.631253
355	K9_L9C3	0.0212	22.2842	53.5786	0.6239	0.7665	0.0367	0.0119	0.074	22.1368	1.3234	-0.0157	-0.0554	100.857	148.78	63.211	0.628526
355	K9_L9C3	-0.0106	22.2201	53.737	0.5622	0.7479	0.063	0.002	0.1371	21.9744	1.1882	0.0301	-0.0308	100.662	150.79	63.332	0.630846
355	K9_L9C3	-0.0059	22.3159	53.5506	0.5812	0.7087	0.0052	-0.0179	0.074	22.1434	1.2612	-0.0118	0.1232	100.763	152.8	63.3119	0.629419
355	K9_L9C3	0.0059	22.337	53.8159	0.6747	0.7171	0	0.0099	0.1151	21.9203	1.1941	-0.019	0.0524	100.842	154.81	63.5485	0.632551
355	K9_L9C3	0.0071	22.0989	52.9489	0.6071	1.0499	0.2253	-0.0258	0.1344	21.9546	1.1851	-0.0007	-0.0246	100.211	156.82	62.8347	0.629803
355	K9_L9C3	0.0177	22.1751	53.5126	0.6929	0.7171	0.0105	-0.006	0.074	21.8791	1.2237	-0.0059	-0.037	100.303	158.83	63.4217	0.630971
355	K9_L9C3	0.0106	22.2063	53.0637	0.7349	0.7706	-0.042	-0.0278	0.1425	22.028	1.182	-0.002	-0.0246	100.139	160.84	63.2339	0.630226
355	K9_L9C3	0.0024	22.2176	53.3472	0.7545	0.7768	0.0472	-0.0298	0.1507	22.0653	1.2675	-0.0131	-0.077	100.629	162.85	63.2001	0.629104
355	K9_L9C3	0.013	22.1134	52.9442	0.8803	0.7376	0.0682	0.0119	0.1314	22.1368	1.3406	0.017	0.0277	100.422	164.86	63.0692	0.626554
355	K9_L9C3	0.0295	21.9858	52.9728	0.9015	0.7752	0.0367	0.0079	0.0986	22.0807	1.2526	-0.0157	0.0062	100.148	166.87	62.9423	0.626651
355	K9_L9C3	0.0035	22.052	53.0528	0.9412	0.8068	-0.021	-0.0079	0.1808	22.2501	1.0753	0.0164	-0.0154	100.379	168.88	62.8011	0.627456
355	K9_L9C3	0.0165	22.002	52.5043	0.9686	0.7843	-0.0367	0.0258	0.0931	22.2785	1.2135	0.0059	-0.0123	99.8924	170.89	62.7485	0.625242
355	K9_L9C3	-0.0142	22.0325	52.8148	0.9003	0.816	0	-0.0179	0.1287	22.1994	1.2226	-0.017	0.0277	100.142	172.9	62.8195	0.626264
355	K9_L9C3	-0.0142	22.1075	52.7705	0.7534	0.788	0.0577	0	0.0877	22.0728	1.1049	0.0039	0.0493	99.7956	174.91	63.0624	0.629521
355	K9_L9C3	0.0165	22.1589	52.9691	0.8621	0.8169	0.0315	0.0318	0.1808	22.0219	1.2968	0.0255	0.0431	100.455	176.91	63.1305	0.628624
355	K9_L9C3	0.02	22.1734	53.2549	0.829	0.7626	-0.0052	0.0218	0.1617	22.14	1.1907	0.0144	0.037	100.605	178.92	63.0968	0.62867
355	K9_L9C7	4.4634	1.9415	69.1128	12.617	2.9258	0.6559	2.3575	0.4311	3.5687	0.1039	-0.0317	-0.0063	98.1776	0	32.1102	0.485066
355	K9_L9C7	0.0297	23.7196	54.4815	1.6255	1.6961	0.0211	0.0199	0.2823	18.8646	0.6485	0.0252	0.0896	101.504	2.03	66.7752	0.684134
355	K9_L9C7	0.0135	25.082	53.4493	2.5128	1.8171	0.0422	0.016	0.3698	16.9765	0.4598	0.0033	0.0031	100.745	4.05	69.8435	0.719363
355	K9_L9C7	0.0504	25.1555	53.0232	3.1345	1.8922	-0.0053	0.014	0.32	16.614	0.4929	-0.0449	0.0743	100.771	6.08	70.1965	0.723777
355	K9_L9C7	0.0325	25.5313	53.306	2.2758	1.7655	-0.0211	-0.012	0.3227	16.5726	0.5407	0.006	0.0774	100.431	8.1	70.7291	0.72665
355	K9_L9C7	0.0106	22.3754	53.5591	0.7394	0.8449	-0.0367	0	0.1836	22.0577	1.2323	-0.017	0.0185	101.022	10.13	63.2844	0.631186
355	K9_L9C7	0.0059	21.7866	53.484	0.6582	0.8031	-0.0157	-0.0079	0.1752	22.7629	1.101	-0.0366	-0.0308	100.777	12.15	62.0106	0.619254
355	K9_L9C7	0.0047	21.804	52.786	0.5862	0.7442	0.0524	0.0258	0.0957	22.6519	1.2213	-0.0104	0.0554	100.028	14.18	62.2146	0.619336
355	K9_L9C7	0.0095	21.6828	52.7769	0.7151	0.7242	0.0367	-0.0178	0.1558	22.8151	1.1943	-0.0333	0.0708	100.181	16.23	61.9466	0.616681
355	K9_L9C7	0.0331	21.6166	53.7983	0.6177	0.7542	-0.021	-0.0318	0.0602	22.621	1.2369	-0.0176	0	100.738	18.26	62.0295	0.617448
355	K9_L9C7	0.0237	21.623	52.6418	0.6672	0.7628	0	-0.0139	0.0984	22.8341	1.2651	0.0117	0.0154	99.9432	20.28	61.8135	0.615136
355	K9_L9C7	0.0261	21.7851	52.8465	0.6292	0.7499	-0.0419	0	0.0356	22.7419	1.1714	0.0026	-0.0031	99.9882	22.3	62.0974	0.618742
355	K9_L9C7	0.0344	21.833	52.7363	0.5847	0.7764	0.0052	0.0238	0.0684	22.7508	1.2475	-0.0267	0.0185	100.079	24.32	62.1066	0.618414
355	K9_L9C7	0.0379	21.8852	52.8759	0.5848	0.7458	-0.0052	0.0198	0.0027	22.6949	1.289	-0.0196	-0.0554	100.136	26.35	62.2571	0.619114
355	K9_L9C7	0.0355	21.9411	52.7815	0.5037	0.7704	-0.0314	0	-0.0055	22.6167	1.1003	-0.0359	-0.0646	99.7492	28.37	62.3635	0.622371
355	K9_L9C7	0.0438	21.8701	52.74	0.5614	0.776	0.0419	-0.0079	0.0739	22.4293	1.2187	-0.0091	0.0616	99.8167	30.45	62.4672	0.622278
355	K9_L9C7	0.0201	21.794	53.2978	0.587	0.7442	0.0419	0.0397	0.1559	22.6853	1.1387	0.0176	0.0215	100.544	32.47	62.1706	0.619724
355	K9_L9C7	0.0379	21.8134	52.9722	0.624	0.7582	-0.0471	0.0238	0.1121	22.6522	1.2563	-0.0313	0.1015	100.352	34.49	62.2066	0.619085
355	K9_L9C7	0.0071	21.7841	53.0366	0.5841	0.7688	0.0367	-0.002	0.0985	22.5907	1.1505	-0.0176	-0.0892	100.057	36.51	62.2227	0.620435
355	K9_L9C7	-0.0012	21.8121	52.9611	0.6654	0.7546	0.0052	-0.002	0.0492	22.687	1.1978	-0.0013	0.0154	100.148	38.53	62.1751	0.619312
355	K9_L9C7	0.0213	21.7812	53.408	0.6217	0.7133	0.0472	0.002	0.1176	22.6264	1.2683	0.0418	0.0861	100.735	40.56	62.2549	0.618871
355	K9_L9C7	0.0225	21.6962	53.6134	0.694	0.7197	-0.0052	0.0119	0.1231	22.7398	1.2893	-0.0131	0	100.91	42.58	62.0417	0.616621
355	K9_L9C7	0.0213	21.7549	52.7475	0.6868	0.7305	0.0157	-0.0139	0.0793	22.6303	1.2711	0.0248	-0.0062	99.9622	44.66	62.2006	0.618519
355	K9_L9C7	0.0225	21.6865	53.6581	0.6854	0.7592	0.0105	0.0119	0.186	22.6354	1.2038	0.0189	0.0369	100.915	46.68	62.0848	0.618399
355	K9_L9C7	0.0154	21.6549	53.1694	0.6646	0.76	0.0524	-0.0139	0.0848	22.6729	1.2273	0.0157	-0.0123	100.317	48.7	62.012	0.617449
355	K9_L9C7	0.0095	21.5988	53.624	0.6887	0.7449	-0.0105	-0.0119	0.1258	22.7963	1.2064	-0.0235	-0.0154	100.794	50.72	61.8474	0.615828
355	K9_L9C7	0.0284	21.677	53.0726	0.7393	0.7119	0.021	0.006	0.0903	22.6187	1.2657	-0.0261	0.0185	100.249	52.74	62.1516	0.617841
355	K9_L9C7	0.0285	21.6789	53.2285	0.7609	0.7306	-0.0105	0	0.0984	22.7785	1.3626	-0.0039	0.0831	100.75	54.77	61.9705	0.615324
355	K9_L9C7	0.0142	21.6327	53.4599	0.7449	0.7096	-0.021	-0.0238	0.1915	22.6	1.1893	-0.0118	-0.0031	100.542	56.79	62.1252	0.618309
355	K9_L9C7	0.0473	21.6331	52.8942	0.7228	0.6978	-0.0105	0.002	0.0985	22.5222	1.1391	-0.0072	-0.0092	99.757	58.87	62.2187	0.619592
355	K9_L9C7	0.0024	21.6643	52.8881	0.7049	0.7062	0.0105	-0.0119	0.093	22.7306	1.2979	-0.002	-0.0031	100.098	60.89	62.0334	0.616278
355	K9_L9C7	-0.0012	21.6619	52.9741	0.6584	0.6882	-0.0052	0.0079	0.093	22.6362	1.2096	-0.0098	0.0215	99.9508	62.91	62.1481	0.618065
355	K9_L9C7	0.0368	21.6332	52.8354	0.7215	0.717	0.021	0	0.1203	22.8335	1.2091	-0.0254	0.0123	100.14	64.94	61.8835	0.615811
355	K9_L9C7	0.0225	21.5616	53.0177	0.6996	0.7216	0.0105	0.0159	0.0958	22.5161	1.3075	-0.0118	-0.0246	99.9686	66.96	62.1164	0.617177
355	K9_L9C7	0.0237	21.6388	52.7563	0.7611	0.7038	0.0052	0.0198	0.1367	22.6111	1.2626	0.0307	-0.0369	99.9499	68.98	62.1281	0.617531
355	K9_L9C7	0.0083	21.5775	53.3668	0.6824	0.7288	0.0157	0.0079	0.0602	22.6984	1.0771	-0.0091	0.0031	100.226	71	61.9421	0.617857
355	K9_L9C7	0.0308	21.5891	52.8135	0.66	0.6809	0.0052	0.0337	0.1477	22.6852	1.1857	0.0144	0.0031	99.8492	73.08	62.0292	0.617025
355	K9_L9C7	0.0131	21.5429	53.0104	0.7029	0.6752	0.0262	0.0059	0.0957	22.8089	1.206	0.0483	0.0677	100.203	75.1	61.8625	0.615094
355	K9_L9C7	-0.0059	21.5861	52.5121	0.7217	0.7423	-0.0262	-0.0159	0.1011	22.7059	1.2711	0.0307	-0.0215	99.6711	77.13	61.9268	0.615934
355	K9_L9C7	0.0261	21.6562	53.0916	0.693	0.7283	0	0.0178	0.1285	22.6623	1.2624	0.002	0.0738	100.342	79.15	62.0645	0.617217
355	K9_L9C7	0.0261	21.7017	52.629	0.765	0.7447	0	0.0059	0.1148	22.6892	1.2947	-0.0267	0.0831	100.054	81.17	62.0662	0.617125
355	K9_L9C7	0.0297	21.6592	52.8701	0.7595	0.7274	0.0157	-0.0238	0.1121	22.7507	1.286	0.0033	-0.0431	100.214	83.19	61.9808	0.616143
355	K9_L9C7	0.0652	21.5622	52.8995	0.6848	0.7331	-0.0367	0.0178	0.0438	22.7775	1.0972	0.015	-0.0246	99.8961	85.21	61.8411	0.616704
355	K9_L9C7	0.0012	21.6225	52.2796	0.7897	0.7698	0.0209	0.002	0.1804	22.7466	1.1559	-0.0326	-0.0154	99.5686	87.23	61.8909	0.617082
355	K9_L9C7	0.0178	21.4756	52.5909	0.893	0.733	0.021	0.0238	0.1148	22.6916	1.1946	0.0294	0.0185	99.8039	89.32	61.8319	0.615626
355	K9_L9C7	0.0213	21.5001	53.1779	0.7582	0.7372	-0.0052	-0.0238	0.1204	22.5696	1.1566	-0.0144	-0.0154	100.041	91.34	61.9754	0.617488
355	K9_L9C7	-0.0024	21.6013	52.8526	0.7674	0.7298	0.0419	-0.0079	0.0738	22.6487	1.2919	0.0365	-0.0185	100.044	93.36	62.0164	0.616456
355	K9_L9C7	-0.0012	21.5603	52.8322	0.64	0.7749	0.0052	-0.002	0.1696	22.5763	1.1977	0.0013	0.0185	99.776	95.38	61.9862	0.617668
355	K9_L9C7	-0.0012	21.5032	52.005	0.8227	0.7413	-0.0157	0	0.1448	22.5715	1.2353	-0.0209	-0.0308	99.0239	97.4	61.9716	0.616712
355	K9_L9C7	0.0345	21.3332	52.7079	1.0313	0.7253	0.0366	0.004	0.1202	22.847	1.4177	-0.015	-0.0492	100.258	99.42	61.5295	0.610292
355	K9_L9C7	0.0059	21.2848	52.1499	1.157	0.7547	0.0157	-0.0059	0.2077	22.7501	1.0908	0.0078	0.0277	99.4521	101.45	61.5348	0.613975
355	K9_L9C7	0.019	21.3304	51.6983	1.084	0.7371	0	0.0099	0.194	22.6996	1.2026	0.0085	0.0184	99.0017	103.53	61.6584	0.61386
355	K9_L9C7	0.0391	21.506	52.6119	0.8401	0.7535	0	-0.0099	0.0957	22.622	1.2182	-0.03	0	99.6865	105.55	61.9085	0.616413
355	K9_L9C7	0.0059	21.5864	52.2723	0.6624	0.7013	-0.0105	0.0099	0.0055	22.5824	1.2945	-0.0156	-0.0338	99.1206	107.57	62.103	0.616922
355	K9_L9C7	-0.0083	21.4453	52.7169	0.7209	0.673	-0.021	-0.004	0.0437	22.6178	1.1737	-0.0026	0.0185	99.4098	109.59	61.9494	0.616234
355	K9_L9C7	0.0237	21.4988	52.4292	0.7298	0.6793	0	-0.0099	0.0766	22.6021	1.1531	-0.0143	-0.0554	99.1926	111.61	62.0158	0.617186
355	K9_L9C7	-0.0154	21.5353	52.6319	0.8104	0.6736	0.021	-0.0079	0.0683	22.6858	1.1734	-0.015	-0.0461	99.5997	113.64	61.9792	0.616553
355	K9_L9C7	0.0344	21.3488	52.3651	0.855	0.7232	-0.0367	0.0099	0.1066	22.7286	1.1881	0.0026	-0.0277	99.3622	115.66	61.6676	0.613922
355	K9_L9C7	0.0143	21.4695	51.8707	0.8119	0.6787	-0.0366	0.002	0.1666	22.7861	1.2881	0.0254	-0.04	99.1134	117.74	61.8003	0.613691
355	K9_L9C7	0.0059	21.4452	51.8005	0.7121	0.6987	-0.0157	0.0258	0.071	22.5424	1.2264	0.0267	0.0123	98.567	119.76	61.992	0.616452
355	K9_L9C7	0.0142	21.3157	52.3185	0.7144	0.6727	-0.0262	-0.0139	0.0711	22.5916	1.1556	0.0065	-0.0338	98.8603	121.78	61.8332	0.615243
355	K9_L9C7	0.0047	21.3814	52.6589	0.7822	0.6348	0.0052	0	0.0656	22.704	1.2794	0.0072	-0.0554	99.5235	123.81	61.8416	0.613613
355	K9_L9C7	0.0095	21.2834	51.9617	0.8218	0.6784	0.0262	-0.0119	0.1613	22.2743	1.168	-0.0163	0.0308	98.4153	125.83	62.111	0.617936
355	K9_L9C7	0.0155	21.4019	51.6106	0.8005	0.6416	0.0262	0.0059	0.0109	22.5888	1.3229	-0.0156	0.1384	98.5632	127.85	61.9713	0.614543
355	K9_L9C7	0.0285	21.5625	51.2218	0.7512	0.62	0.0105	0.0059	0.1419	22.6688	1.2106	0.0091	0.0061	98.2369	129.87	62.0948	0.616646
355	K9_L9C7	-0.0024	21.4161	52.2574	0.7757	0.6532	-0.0366	0.0099	0.1037	22.7944	1.2726	-0.0267	0.0031	99.2861	131.96	61.7658	0.613174
355	K9_L9C7	0.0249	21.449	52.1034	0.782	0.67	-0.0314	0.0297	0.112	22.4969	1.0962	-0.0111	0.0092	98.7732	133.98	62.079	0.618262
355	K9_L9C7	-0.0012	21.3279	52.0511	0.7921	0.5908	0.0419	0.002	0.1474	22.7095	1.1132	0.0104	0.0707	98.8569	136	61.8336	0.614632
355	K9_L9C7	0.019	21.4631	52.0701	0.7397	0.6652	-0.0523	-0.0099	0.1147	22.611	1.2788	0.0208	-0.0307	98.9825	138.02	61.9858	0.615442
355	K9_L9C7	0.0083	21.3357	51.2288	0.7553	0.6879	-0.0419	-0.0238	0.1256	22.5617	1.1961	0.0046	-0.0061	97.904	140.04	61.8658	0.615354
355	K9_L9C7	0.0154	21.3439	51.6134	0.7448	0.6698	0.0523	0.0099	0.1447	22.5028	1.1843	0.0007	0.0676	98.3497	142.06	61.9576	0.616151
355	K9_L9C7	0.0261	21.3046	51.9353	0.754	0.6887	0.0314	0.0139	0.1693	22.5333	1.2168	-0.0182	-0.0061	98.6733	144.08	61.8589	0.615083
355	K9_L9C7	0.0131	21.2109	51.8948	0.835	0.6533	-0.0157	0	0.071	22.5473	1.2845	0	0.0061	98.516	146.17	61.7865	0.613216
355	K9_L9C7	-0.0024	21.2191	52.1878	0.767	0.603	0.0524	0.0258	0.0765	22.5081	1.2789	0.0046	0.0707	98.7937	148.19	61.9005	0.613754
355	K9_L9C7	-0.0024	21.1698	51.9035	0.8067	0.6496	-0.0314	-0.002	0.1393	22.5509	1.0432	-0.0033	-0.0246	98.2631	150.21	61.7419	0.615161
355	K9_L9C7	0.0202	21.2703	51.7549	0.7215	0.6211	-0.0105	0.0258	0.0765	22.5415	1.1226	0.0026	-0.0369	98.1569	152.23	61.9001	0.615571
355	K9_L9C7	0.0107	21.2349	51.8465	0.7395	0.667	-0.0209	0	0.0492	22.403	1.2349	0.0072	-0.0461	98.1929	154.25	61.9414	0.615425
355	K9_L9C7	-0.0202	21.2324	51.5843	0.748	0.6082	-0.0209	0.0099	0.0737	22.4824	1.2194	-0.0013	-0.0615	97.9582	156.27	61.9345	0.61476
355	K9_L9C7	0.032	21.1658	52.4414	0.6527	0.6333	-0.0052	0.0079	0.1175	22.3451	1.2974	-0.0059	-0.0338	98.6931	158.29	61.9673	0.614599
355	K9_L9C7	-0.0415	21.1423	51.424	0.7265	0.6014	0.0314	-0.0099	0.1448	22.294	1.2202	-0.0078	-0.0307	97.5846	160.38	62.0349	0.615633
355	K9_L9C11	5.2615	0.1848	50.0007	25.6951	9.1994	0.0371	0.3714	0.0981	1.3104	0.0581	0.0205	-0.0062	92.2372	0	2.45361	0.193927
355	K9_L9C11	4.6879	7.3102	51.8185	17.3899	6.518	0.0053	0.3402	0.1193	7.6899	0.2661	-0.0131	0.0746	96.2198	2.05	44.8235	0.620804
355	K9_L9C11	0.028	25.3846	52.6757	2.1243	1.6427	0.0158	0.022	0.2861	16.6556	0.5609	0.0415	0.0093	99.4464	4.1	70.6916	0.724302
355	K9_L9C11	0.0335	24.2935	51.2502	1.474	1.2218	-0.0052	0.0298	0.2037	19.7861	0.9986	-0.0066	0.0986	99.3897	6.15	66.9768	0.675556
355	K9_L9C11	0.026	22.2805	51.6245	0.5894	0.779	0.0157	-0.004	0.1585	22.3237	1.2353	0.017	-0.0615	99.0496	8.2	63.0036	0.627517
355	K9_L9C11	0.0083	22.2518	51.6902	0.5414	0.7458	0.0314	-0.004	0.1421	22.3158	1.3204	-0.0261	-0.1383	99.0471	10.25	63.024	0.62644
355	K9_L9C11	0.013	22.2599	52.2224	0.6221	0.7496	0.0471	0.0218	0.1176	22.3713	1.245	0.0222	-0.0369	99.692	12.3	62.9721	0.626732
355	K9_L9C11	0.0166	22.2932	51.8431	0.5579	0.7107	-0.0157	-0.002	0.1613	22.3615	1.2328	0.0026	0.0369	99.2165	14.35	63.0666	0.627301
355	K9_L9C11	-0.0012	22.1504	51.721	0.5826	0.6985	-0.0262	-0.0198	0.1229	22.34	1.4269	0.0404	0.0338	99.1165	16.4	62.9541	0.624066
355	K9_L9C11	0.0296	22.1234	51.4257	0.5914	0.6945	0.0209	0.0258	0.1667	22.5222	1.2499	0.0359	0.0184	98.9042	18.45	62.7483	0.62375
355	K9_L9C11	-0.013	22.0967	51.5612	0.6376	0.7185	0.0262	0.0456	0.0601	22.5026	1.2679	0.0156	-0.0154	98.932	20.5	62.709	0.62348
355	K9_L9C11	0.0249	22.0955	51.6803	0.566	0.76	0.0314	-0.004	0.1202	22.4572	1.3264	0.0209	-0.0461	99.0828	22.55	62.6999	0.623331
355	K9_L9C11	0.0202	22.0995	51.6065	0.5097	0.6801	0.0628	0.0337	0.142	22.4883	1.4206	0.0228	0.0246	99.1108	24.6	62.7754	0.622128
355	K9_L9C11	0.0071	22.0728	52.2508	0.6069	0.7533	-0.0157	0.0357	0.1121	22.5336	1.3242	0.0241	0.0062	99.7267	26.65	62.6083	0.622359
355	K9_L9C11	-0.0166	22.1201	51.6196	0.5447	0.7237	0.0105	0.0357	0.0901	22.5446	1.3913	-0.0124	-0.0246	99.0802	28.7	62.6852	0.622086
355	K9_L9C11	0.0201	22.0802	52.5045	0.5437	0.6706	0.0314	0.002	0.041	22.5318	1.1886	0.0157	-0.0215	99.6296	30.75	62.7236	0.62381
355	K9_L9C11	0.0142	22.0071	52.0467	0.7214	0.716	0.0366	-0.0119	0.0738	22.4985	1.3679	0.0007	-0.0861	99.4829	32.8	62.6212	0.621568
355	K9_L9C11	0.013	21.9905	51.8557	0.6734	0.6893	0.0052	-0.0139	0.0738	22.455	1.2266	-0.0072	-0.0277	98.9826	34.85	62.6813	0.623234
355	K9_L9C11	0.0308	22.0249	52.0041	0.6499	0.6614	-0.0314	0.002	0.0847	22.4311	1.3205	0.0143	-0.0277	99.2235	36.9	62.7777	0.622896
355	K9_L9C11	-0.0036	22.0625	51.9791	0.6171	0.6702	0.0209	0.0178	0.071	22.4428	1.2881	-0.0274	0.1045	99.2743	38.95	62.7945	0.623505
355	K9_L9C11	0.0119	21.929	52.3921	0.6431	0.6601	0.0262	0.0178	0.0164	22.5098	1.3856	0.017	0.0861	99.695	41	62.5983	0.620443
355	K9_L9C11	0.0379	21.9856	51.6107	0.7602	0.6956	0.0052	0.0139	0.0711	22.4782	1.2945	0.0274	0.0246	99.0049	43.05	62.6448	0.622271
355	K9_L9C11	-0.0012	21.9158	51.8519	0.7625	0.7222	-0.0052	-0.0218	0.1284	22.4945	1.3059	0.043	-0.0061	99.2242	45.11	62.5199	0.621248
355	K9_L9C11	0.0166	21.9907	51.6982	0.6585	0.7388	-0.0157	-0.0099	0.1148	22.4455	1.185	-0.002	-0.0369	98.848	47.16	62.6275	0.623748
355	K9_L9C11	0.0083	22.0738	51.8049	0.5856	0.7699	0.0366	0.0139	0.112	22.7169	1.252	0.0137	-0.0031	99.3875	49.21	62.4062	0.621287
355	K9_L9C11	0.0509	22.026	52.1133	0.5057	0.7877	0.0052	0.0317	0.1312	22.5035	1.2559	-0.0176	0	99.411	51.26	62.5446	0.622839
355	K9_L9C11	0.0106	22.0518	51.7251	0.5208	0.7705	0.0523	-0.0059	0.1257	22.2351	1.2443	-0.0117	-0.0277	98.7364	53.31	62.8627	0.625894
355	K9_L9C11	0.0225	21.9549	51.9162	0.5717	0.8189	-0.0105	0.0178	0.0901	22.338	1.3584	-0.0007	0.0615	99.15	55.36	62.5943	0.62269
355	K9_L9C11	0.0473	21.9478	52.3723	0.5829	0.7798	0.0052	0.0475	0.0383	22.3818	1.3559	0.0111	-0.0277	99.57	57.41	62.593	0.622205
355	K9_L9C11	-0.0272	21.9287	52.2283	0.5434	0.805	-0.0105	-0.0218	0.1312	22.3986	1.3766	0.0059	0.0215	99.4391	59.46	62.5235	0.621627
355	K9_L9C11	0.013	21.8995	52.1321	0.5548	0.7836	-0.0157	-0.0079	0.0656	22.5209	1.1787	-0.0248	0.0031	99.1513	61.51	62.3975	0.622087
355	K9_L9C11	-0.0225	21.9546	51.4875	0.5476	0.8143	-0.0105	-0.0139	0.082	22.3955	1.2759	0.0196	-0.0768	98.5768	63.56	62.5423	0.622945
355	K9_L9C11	0.0012	21.863	52.1416	0.6274	0.8282	0.0052	0.0099	0.0492	22.3647	1.1203	0.028	0	99.0388	65.61	62.4573	0.623838
355	K9_L9C11	0.0189	21.9286	52.1039	0.6396	0.7871	-0.0105	-0.0059	0.0656	22.4221	1.2471	-0.015	0.04	99.2529	67.66	62.5228	0.622692
355	K9_L9C11	-0.0095	21.9256	51.9312	0.537	0.7763	-0.0157	0.004	0.1639	22.5149	1.2818	0.0222	0.0092	99.166	69.71	62.4407	0.621393
355	K9_L9C11	-0.0118	21.9172	52.0043	0.5598	0.8021	0.0942	-0.0059	0.1039	22.3046	1.0908	-0.0287	-0.0338	98.8768	71.76	62.6091	0.625318
355	K9_L9C11	0.0047	21.9179	51.8649	0.5318	0.7925	0	0.0079	0.0246	22.1782	1.2557	-0.0007	-0.0184	98.5782	73.81	62.7493	0.624919
355	K9_L9C11	0.0177	21.9741	52.0303	0.4904	0.7853	-0.0157	0.0238	0.0847	22.2729	1.2408	0.0137	-0.0553	98.9338	75.86	62.7232	0.624725
355	K9_L9C11	0.0012	21.9649	52.7255	0.4203	0.7642	-0.0419	-0.0099	0.0902	22.043	1.4094	-0.0104	0.1076	99.5262	77.91	62.9725	0.625217
355	K9_L9C11	0.0224	22.0047	52.348	0.3593	0.7721	-0.0314	0.002	0.1531	22.1656	1.1618	0.0052	0.0307	99.025	79.96	62.8807	0.626923
355	K9_L9C11	0.0071	22.062	52.2139	0.3629	0.784	0.0262	-0.0297	0.0383	22.3228	1.1911	-0.0111	-0.0184	99.0082	82.01	62.7681	0.625665
355	K9_L9C11	0.0201	22.0771	52.9761	0.3756	0.8095	-0.0105	0.0218	0.1149	22.2696	1.1975	-0.0072	0.0369	99.899	84.06	62.8047	0.626291
355	K9_L9C11	0.0165	22.0796	52.4201	0.3363	0.761	0.0209	-0.0337	0.1121	22.1673	1.306	0.0065	-0.0676	99.2263	86.11	62.9726	0.626241
355	K9_L9C11	-0.0083	21.9757	52.8422	0.4017	0.8365	-0.0157	-0.0277	0.0957	22.216	1.226	-0.0235	0.0492	99.6429	88.16	62.7161	0.625459
355	K9_L9C11	-0.0035	22.0923	52.5089	0.3229	0.8141	-0.0262	-0.0258	0.0492	22.0758	1.2682	0.0196	-0.0061	99.151	90.21	63.0096	0.627672
355	K9_L9C11	-0.0024	22.0906	52.557	0.366	0.8024	-0.0157	0.0059	0.0656	22.1498	1.1738	0.0196	0.0461	99.277	92.26	62.9484	0.62787
355	K9_L9C11	0.0071	22.0832	53.24	0.3753	0.8229	-0.0524	0.0159	0.0711	22.1978	1.2504	-0.0085	-0.0553	100.064	94.31	62.8659	0.626537
355	K9_L9C11	0.0212	22.0294	52.3097	0.3346	0.7732	-0.0419	0	0.0191	22.0925	1.2505	-0.0072	0.0062	98.8364	96.36	62.9792	0.627017
355	K9_L9C11	0.0378	22.0316	53.0532	0.3012	0.8019	0.0576	0.0119	0.0793	22.2606	1.2303	-0.0033	-0.0308	99.8654	98.41	62.7753	0.625566
355	K9_L9C11	-0.0059	21.9281	53.3226	0.3206	0.771	0.0157	0.002	0.0821	22.0681	1.177	-0.0301	-0.0523	99.6873	100.46	62.8992	0.626931
355	K9_L9C11	0.0401	22.0692	52.6249	0.3062	0.7833	0.0681	0.0317	0.0875	22.0636	1.2562	0.0065	0.0338	99.3711	102.51	63.0374	0.627671
355	K9_L9C11	0.0047	22.0818	52.8265	0.3774	0.783	0.0157	0.002	0.0738	22.2887	1.2794	0.0307	0.0615	99.825	104.56	62.8245	0.625325
355	K9_L9C11	0.0141	21.96	53.3303	0.3453	0.7456	0.0105	-0.0099	0.134	22.0743	1.2212	-0.0007	-0.0092	99.8354	106.61	62.9598	0.626759
355	K9_L9C11	0.0554	22.0725	52.3272	0.3643	0.8077	0.0471	0.0178	0.0574	22.0742	1.2237	0.0124	-0.0092	99.0598	108.66	62.9986	0.627929
355	K9_L9C11	0.0448	22.0725	52.5709	0.2847	0.7907	0	0.0574	0.0874	22.1337	1.3026	0.0444	0.0307	99.4197	110.71	62.9606	0.626535
355	K9_L9C11	0.0366	22.204	52.9357	0.2881	0.8147	-0.0052	-0.0159	0.0601	22.4151	1.2087	-0.0078	-0.0215	99.963	112.76	62.7865	0.626074
355	K9_L9C11	0.0047	22.0543	52.8066	0.3508	0.8197	0.0314	-0.0079	0.0219	22.2322	1.15	0.0072	-0.0215	99.4787	114.81	62.8049	0.626902
355	K9_L9C11	0.0142	21.9669	53.2794	0.3817	0.7713	-0.0209	0.0119	0.0957	22.1486	1.3858	-0.0287	-0.0277	100.055	116.86	62.8587	0.624424
355	K9_L9C11	0.0035	21.9668	53.1628	0.3108	0.8086	0.0262	-0.0258	0.082	22.1444	1.2355	0	0.1107	99.8513	118.91	62.8147	0.625984
355	K9_L9C11	0.0035	22.0113	52.6425	0.3773	0.8177	0.0105	0	0.0902	22.2585	1.2263	0.0274	0.0031	99.4681	120.96	62.7355	0.625411
355	K9_L9C11	0.0424	21.9271	53.2054	0.3699	0.7494	0	-0.002	0.1477	22.0161	1.1088	-0.0026	-0.0092	99.5667	123.01	62.9789	0.62814
355	K9_L9C11	0.0212	22.0906	52.4576	0.4155	0.8128	-0.0157	-0.0218	0.0683	22.2704	1.173	-0.0568	0.0246	99.3341	125.06	62.8139	0.626673
355	K9_L9C11	0.0142	21.9949	52.8449	0.4449	0.8013	0.0366	0	0.0875	22.1419	1.3238	0.0183	-0.0615	99.7082	127.12	62.8565	0.625415
355	K9_L9C11	0.0201	22.0635	52.8214	0.4303	0.7855	0.0419	0.002	0.0574	22.2601	1.3534	-0.0013	-0.0154	99.8355	129.16	62.8306	0.62467
355	K9_L9C11	0.0248	21.9364	52.6985	0.4318	0.8231	-0.0157	0.0317	0.1505	22.0741	1.189	0.0144	-0.0369	99.3742	131.22	62.8345	0.626837
355	K9_L9C11	-0.0047	21.9387	52.7857	0.3773	0.799	0.0105	0.0178	0.0437	22.2328	1.2471	-0.015	-0.0953	99.4526	133.27	62.7081	0.624683
355	K9_L9C11	0.0449	21.9622	52.5913	0.4219	0.7898	0	0.0158	0.1421	22.1633	1.3262	0.0391	0.0461	99.5427	135.32	62.815	0.624829
355	K9_L9C11	0.059	21.9165	53.3631	0.512	0.8374	0.0157	-0.004	0.1257	22.2588	1.3295	-0.0013	-0.0461	100.418	137.37	62.6089	0.623355
355	K9_L9C11	-0.0035	21.7876	53.6826	0.3959	0.78	-0.0052	0.0079	0.0492	22.2721	1.1674	-0.0287	-0.0246	100.143	139.42	62.5313	0.623476
355	K9_L9C11	0.0047	21.9518	52.9387	0.4766	0.8032	0.0314	-0.0218	0.1149	22.3782	1.3127	-0.0098	-0.0277	100.012	141.47	62.5709	0.622717
355	K9_L9C11	0.0165	21.888	53.1166	0.463	0.8516	0.0052	0.0198	0.1368	22.2032	1.2865	0.0124	0.0554	100.055	143.52	62.616	0.624038
355	K9_L9C11	0.0094	21.9113	53.2205	0.5057	0.7915	-0.0052	-0.0139	0.0875	22.2166	1.2745	-0.0294	-0.0123	100.017	145.57	62.7049	0.624275
355	K9_L9C11	-0.026	21.88	53.199	0.5714	0.7981	0.0471	0.0218	0.1586	22.2374	1.2737	0.0039	-0.0523	100.191	147.62	62.642	0.62374
355	K9_L9C11	-0.0024	21.8172	52.4337	0.5378	0.7931	-0.0314	-0.0079	0.0765	22.3884	1.2673	-0.03	0.0584	99.3724	149.67	62.4295	0.621626
355	K9_L9C11	0.0342	21.8333	52.9632	0.4743	0.7784	0.0052	-0.0396	0.0547	22.3814	1.1791	0.0124	0.0061	99.7223	151.72	62.4727	0.622758
355	K9_L9C11	0.0603	21.9017	52.9777	0.5308	0.7847	0.0052	-0.0139	0.0683	22.4419	1.2412	0.0046	-0.0154	100.016	153.77	62.4773	0.622266
355	K9_L9C11	0.0177	21.8907	52.6371	0.5558	0.7923	0.0209	-0.0238	0.0765	22.4174	1.2259	0.0033	0.0522	99.6898	155.82	62.4803	0.622545
355	K9_L9C11	-0.0059	21.803	53.8222	0.5873	0.7587	0.0262	0	0.0765	22.4289	1.3208	-0.002	-0.0338	100.823	157.87	62.4178	0.620533
355	K9_L9C11	0.013	21.7667	53.1924	0.4954	0.7649	0.0052	-0.0139	-0.0109	22.2324	1.3117	0.0078	0.0123	99.8019	159.92	62.5683	0.622187
355	K9_L9C11	0.039	21.8653	53.3598	0.5912	0.8059	0.0105	-0.0218	0.0765	22.4134	1.297	-0.0346	0.0277	100.486	161.97	62.4397	0.621598
355	K9_L10C4	4.9158	1.6278	63.7145	13.859	3.2072	0.498	2.101	0.232	3.7281	0.1402	-0.0225	0.0094	94.0329	0	27.0204	0.428493
355	K9_L10C4	0.1711	21.5874	54.6638	2.4847	1.4351	0.0211	0.3071	0.2991	17.2264	0.7678	0.026	-0.0401	98.9896	2.28	66.8698	0.681258
355	K9_L10C4	0.0282	25.0225	53.6152	0.6736	1.4967	-0.0264	-0.008	0.2383	17.2695	0.5628	-0.04	-0.0185	98.9068	4.22	69.922	0.714309
355	K9_L10C4	0.0417	25.253	54.0276	0.6539	1.4774	0.0791	-0.006	0.1662	17.2908	0.7205	0.0133	-0.0556	99.7235	6.24	70.1183	0.71412
355	K9_L10C4	0.0357	25.8626	54.0122	0.7412	1.7784	0.0369	0.004	0.2306	16.2962	0.5758	-0.0027	-0.0247	99.5736	8.27	71.2805	0.731992
355	K9_L10C4	0.0078	26.2214	53.6125	0.686	1.7393	-0.0634	-0.012	0.1056	15.9808	0.6028	-0.0094	-0.0124	98.9563	10.31	71.9645	0.738028
355	K9_L10C4	0.0389	24.3597	53.4839	0.4711	1.3336	-0.0158	0	0.1212	19.0061	0.9992	-0.0178	-0.0123	99.8138	12.35	67.7025	0.684459
355	K9_L10C4	0.0269	22.7219	52.524	0.2169	0.7456	0.0419	0.0099	0.0684	21.4441	1.0649	0.0248	0	98.8894	14.4	64.3903	0.642643
355	K9_L10C4	-0.0141	22.2868	52.9021	0.2662	0.7441	0.0471	-0.0178	0.0902	21.9563	1.2555	0.0202	-0.0092	99.5685	16.45	63.4248	0.631042
355	K9_L10C4	0.0071	22.0744	53.0419	0.3157	0.7258	0.0366	0.0059	0.0137	22.3011	1.1429	0.043	-0.0092	99.7081	18.5	62.8778	0.626499
355	K9_L10C4	0.0106	21.8186	52.5892	0.4925	0.7185	0	-0.004	0.0573	22.3035	1.2164	0.0033	-0.0061	99.2098	20.55	62.6124	0.623
355	K9_L10C4	0.0414	21.7107	52.2111	0.5772	0.7772	-0.0209	0.002	0.0655	22.4618	1.3984	-0.0091	0.0031	99.2484	22.6	62.2615	0.61843
355	K9_L10C4	0.0249	21.7134	52.1387	0.6665	0.7771	-0.0105	0.0059	0.0682	22.7551	1.1507	-0.0059	0	99.3005	24.65	61.9721	0.618041
355	K9_L10C4	0.0296	21.7663	52.183	0.5524	0.757	-0.0157	0.0099	0.1365	22.3542	1.2635	0.0052	0	99.0576	26.7	62.4554	0.621455
355	K9_L10C4	0.0284	21.8144	52.3992	0.5176	0.7502	-0.0052	0.0257	0.0655	22.5528	1.3478	-0.0254	-0.046	99.5016	28.75	62.317	0.619162
355	K9_L10C4	0.0047	21.87	52.0224	0.452	0.8096	-0.0314	0.0099	0.1119	22.5148	1.2601	0.0085	0.0461	99.11	30.8	62.3387	0.621014
355	K9_L10C4	0.0249	21.9136	52.1661	0.437	0.8081	0.0575	0.0198	0.1174	22.4717	1.3044	0.0254	-0.0399	99.3458	32.85	62.4304	0.621465
355	K9_L10C4	0.026	21.9047	52.7527	0.402	0.7113	-0.0314	-0.0079	0.1665	22.4964	1.3518	-0.0098	-0.0799	99.8114	34.9	62.5201	0.620651
355	K9_L10C4	0.0177	21.9921	52.6051	0.2715	0.7469	-0.0262	0.0158	0.0218	22.4868	1.2752	-0.028	-0.0215	99.4329	36.96	62.5774	0.622449
355	K9_L10C4	0.0331	22.0352	52.4992	0.3558	0.73	-0.0052	-0.002	0.0873	22.3644	1.2423	0.0052	-0.1105	99.3526	39.01	62.7674	0.624451
355	K9_L10C4	0.0118	21.8766	52.5527	0.501	0.7124	-0.0157	0.0059	0.0818	22.6336	1.2801	0.013	0.0184	99.6874	41.06	62.3515	0.619713
355	K9_L10C4	0.0118	21.7558	52.3089	0.6601	0.752	0.0105	-0.004	0.09	22.6796	1.251	-0.0254	-0.086	99.5197	43.11	62.125	0.618244
355	K9_L10C4	0.0083	21.7702	51.8286	0.5847	0.7198	0.0261	0.0099	0.0901	22.5944	1.2543	0.0488	0.0184	98.9535	45.16	62.2667	0.619208
355	K9_L10C4	0.0083	21.8067	52.5423	0.5523	0.6734	0.0157	0.0198	0.1338	22.516	1.2928	0.0013	0.0092	99.5714	47.21	62.444	0.619992
355	K9_L10C4	0.0177	21.6783	52.5089	0.5502	0.7258	0.0261	0.002	0.0818	22.5694	1.2803	0.0299	0	99.4706	49.27	62.1845	0.618197
355	K9_L10C4	-0.0059	21.6186	52.546	0.5633	0.7364	0.0471	-0.0356	0.0846	22.4367	1.3486	0.0261	0.0123	99.4195	51.32	62.2392	0.618175
355	K9_L10C4	0.0154	21.7273	52.9724	0.5418	0.7525	0	-0.0416	0.0983	22.5406	1.2282	0.0111	-0.0338	99.8875	53.37	62.2322	0.619537
355	K9_L10C4	0.0379	21.7216	52.2554	0.4897	0.7537	0.0366	-0.0178	0.1256	22.5282	1.2012	-0.0449	-0.0645	99.1499	55.42	62.2369	0.619869
355	K9_L10C4	0.039	21.8089	52.6983	0.4792	0.7946	0	-0.002	0.1092	22.4047	1.3604	-0.0169	-0.0061	99.6944	57.47	62.4023	0.62044
355	K9_L10C4	0.0047	21.732	52.72	0.4361	0.7997	0.0105	-0.0178	0.0573	22.3685	1.2104	-0.0371	0.0061	99.3454	59.53	62.3491	0.621477
355	K9_L10C4	0	21.7325	52.3979	0.4911	0.7316	0.0157	0.0099	0.06	22.5665	1.2365	-0.0085	0.0092	99.251	61.58	62.2387	0.619253
355	K9_L10C4	0.0497	21.7486	52.3256	0.5673	0.7725	-0.0209	0.0059	0.1092	22.5828	1.2776	0.0013	0.0184	99.4589	63.63	62.1875	0.618855
355	K9_L10C4	0.0154	21.6781	52.6552	0.5716	0.7708	0.0052	0.0198	0.09	22.6522	1.2715	-0.0007	0.0123	99.742	65.68	62.0441	0.617464
355	K9_L10C4	0.0189	21.713	52.1377	0.65	0.7762	-0.0052	-0.0099	0.0955	22.5827	1.3361	-0.002	-0.0338	99.31	67.74	62.1444	0.617885
355	K9_L10C4	-0.0201	21.7113	52.2529	0.5836	0.7811	-0.0732	-0.0119	0.1938	22.5385	1.2248	-0.0573	0.0154	99.3013	69.79	62.1804	0.619418
355	K9_L10C4	0.0012	21.7028	52.2914	0.4712	0.8097	0.0209	-0.0079	0.0792	22.37	1.2633	0.0176	0.0307	99.058	71.84	62.3032	0.620612
355	K9_L10C4	-0.0154	21.7502	52.099	0.4615	0.7432	-0.0209	0.0237	0.0573	22.4261	1.298	-0.0104	-0.0031	98.859	73.89	62.3836	0.620219
355	K9_L10C4	0.0142	21.8746	52.7832	0.4083	0.7654	0.0209	0.0059	0.1037	22.525	1.204	0.0482	-0.0583	99.7535	75.94	62.39	0.621525
355	K9_L10C4	0.0201	21.9307	52.6735	0.3869	0.8208	0.0366	0.0119	0.0819	22.3849	1.3398	-0.0163	0.043	99.73	78	62.5191	0.622153
355	K9_L10C4	0.0236	21.89	51.9227	0.2581	0.8017	-0.0888	0.0475	0.0628	22.1206	1.3278	0.013	-0.0184	98.4678	80.05	62.7657	0.624467
355	K9_L10C4	0.0473	21.8517	52.7501	0.3487	0.8166	0.0261	-0.0059	0.0218	22.4879	1.3217	0.0215	0.0092	99.7025	82.1	62.3369	0.620466
355	K9_L10C4	0.0248	21.7433	52.5615	0.6112	0.7506	0.0366	-0.0059	0.0764	22.4537	1.2159	0.0117	-0.0184	99.4858	84.15	62.339	0.620696
355	K9_L10C4	0	21.6066	52.3816	0.6242	0.8502	0.0052	-0.004	0.1692	22.368	1.3215	-0.0111	0.0553	99.3818	86.2	62.1487	0.618999
355	K9_L10C4	-0.0106	21.648	52.4151	0.6161	0.8331	0.0209	-0.0218	0.0928	22.5446	1.1743	0.0059	-0.0276	99.3506	88.26	62.0391	0.619177
355	K9_L10C4	0.0308	21.7266	52.1181	0.5919	0.8326	0.0052	-0.0297	0.0982	22.5782	1.2679	-0.0182	-0.0614	99.2495	90.31	62.0916	0.618759
355	K9_L10C4	0.0236	21.6917	52.1373	0.6677	0.7779	0.0105	0.0119	0.09	22.5436	1.1184	0.0117	0.0031	99.0873	92.36	62.1581	0.620225
355	K9_L10C4	0.0237	21.1187	50.2476	0.5712	2.7261	1.8584	-0.002	0.0903	21.9981	1.1785	0.0039	-0.0644	99.8166	94.41	59.6257	0.618789
355	K9_L10C4	0.0284	21.7193	52.1042	0.4066	0.9632	0.1723	0.0138	0.0601	22.2872	1.2658	0.0091	0.046	99.0761	96.47	62.207	0.621591
355	K9_L10C4	0.0071	21.8172	52.5615	0.451	0.781	0.0157	0.0218	0.0737	22.3398	1.242	-0.0143	0.0368	99.3475	98.52	62.4938	0.622365
355	K9_L10C4	0.0035	21.8137	52.4298	0.5204	0.8231	0.0261	0.0139	0.0737	22.1591	1.3162	-0.0156	0.043	99.2225	100.57	62.6176	0.62338
355	K9_L10C4	0.0177	21.8524	52.6185	0.5106	0.8332	-0.0575	0.0277	0.1119	22.4381	1.3073	0.0163	-0.0061	99.7337	102.62	62.3662	0.621111
355	K9_L10C4	0.0224	21.7718	52.7345	0.4805	0.8047	-0.0105	0.002	0.1337	22.2909	1.3277	0.0143	-0.0215	99.5827	104.68	62.4636	0.621497
355	K9_L10C4	0.0212	21.7771	52.5364	0.5565	0.7884	0.0314	-0.002	0.0983	22.3315	1.11	-0.0013	0.0031	99.2539	106.73	62.4494	0.62335
355	K9_L10C4	0.0318	21.8577	52.7118	0.3782	0.8146	0.0209	0.0297	0.1693	22.1547	1.2105	-0.0248	0.0246	99.4038	108.78	62.6801	0.624968
355	K9_L10C4	0.0212	21.8947	52.6948	0.4065	0.7931	0.0105	-0.0277	0.0437	22.3269	1.2453	-0.0137	0.0276	99.4642	110.83	62.5742	0.623293
355	K9_L10C4	-0.0035	21.842	53.2072	0.5115	0.8119	-0.0052	-0.004	0.1147	22.3273	1.3692	0.0169	-0.0184	100.201	112.9	62.4932	0.621475
355	K9_L10C4	0.0224	21.8747	53.1529	0.5528	0.8105	0.0157	-0.0396	0.1502	22.37	1.2779	0.0046	-0.0215	100.232	114.95	62.4873	0.622321
355	K9_L10C4	0.0472	21.8129	52.1548	0.5554	0.7884	0.0366	0.0178	0.1119	22.1803	1.2278	-0.0033	-0.0215	98.933	117	62.6402	0.624055
355	K9_L10C4	0.0024	21.8064	52.4349	0.5057	0.8263	0.0627	0.0218	0.1311	22.3791	1.1985	-0.0202	-0.0246	99.3689	119.05	62.3846	0.622296
355	K9_L10C4	0.0637	21.489	52.0509	0.5267	2.1727	1.1855	-0.0059	0.0438	22.0384	1.1942	-0.036	-0.0215	100.765	121.11	60.6794	0.622312
355	K9_L10C4	0.0212	21.8214	52.5778	0.4455	1.3753	0.3913	0.0079	0.0929	22.2123	1.1989	0.0144	-0.0675	100.159	123.16	61.8681	0.624119
355	K9_L10C4	0.0165	21.9802	53.3559	0.3317	0.8137	0.0419	0.0337	0.0875	22.0249	1.2557	-0.0229	-0.0092	99.9416	125.21	62.9429	0.627119
355	K9_L10C4	0.0012	22.0272	53.4615	0.2757	0.7677	-0.0157	0.002	0.0792	21.9919	1.3437	-0.0144	-0.0676	99.9502	127.26	63.0858	0.627056
355	K9_L10C4	0.0047	22.0619	53.2848	0.3814	0.7951	0.0366	0.0059	0.0683	22.118	1.3168	-0.0117	0.0461	100.12	129.31	62.9595	0.626436
355	K9_L10C4	0.0047	22.0332	53.3437	0.4125	0.7707	0	0.0297	0.0847	22.0034	1.2696	-0.0111	0.0491	100.001	131.37	63.0766	0.627757
355	K9_L10C4	0.0141	21.9689	53.8163	0.4798	0.7663	-0.0052	0.002	0.0656	22.1623	1.155	-0.0196	0.0799	100.51	133.42	62.8535	0.626644
355	K9_L10C4	0.0106	21.8828	53.3381	0.5527	0.749	0.0052	-0.0297	0.0793	22.1789	1.1729	0.0098	-0.0092	99.9793	135.47	62.7674	0.625376
355	K9_L10C4	0.046	21.8765	52.7547	0.5766	0.7284	0.0261	-0.0119	0.0136	22.3869	1.2539	0.0098	0.0737	99.7464	137.52	62.5777	0.622414
355	K9_L10C4	0.0318	21.9196	53.1375	0.6749	0.7222	0.0157	0.0099	0.1393	22.3356	1.2456	-0.002	0.0215	100.254	139.58	62.6833	0.62347
355	K9_L10C4	0.0165	21.8866	53.0324	0.5694	0.7096	0.0314	-0.002	0.1502	22.3333	1.2338	-0.0143	-0.0061	99.9631	141.63	62.6666	0.623258
355	K9_L10C4	0.0153	21.8934	53.4392	0.6184	0.7187	0.0366	0.0099	0.1229	22.1653	1.2757	-0.0026	0.0246	100.32	143.68	62.8317	0.624584
355	K9_L10C4	-0.0094	21.9959	52.7815	0.4858	0.715	0.0261	0.0079	0.0437	22.5094	1.1008	0.0189	0.0276	99.7126	145.73	62.5997	0.624016
355	K9_L10C4	-0.0012	22.0501	53.4392	0.467	0.714	0.0157	-0.0079	0.0273	22.127	1.2639	0.0144	-0.0092	100.118	147.78	63.0429	0.626756
355	K9_L10C4	0.0177	21.9946	53.3884	0.4819	0.6613	0.0052	-0.0238	0.0956	22.1371	1.1522	-0.0215	0.0154	99.9494	149.84	63.0423	0.627198
355	K9_L10C4	0.0047	22.1136	53.3727	0.3039	0.7454	0.0314	-0.004	0.1038	22.1663	1.2461	0.0294	-0.0491	100.117	151.89	63.0296	0.627216
355	K9_L10C4	-0.0106	21.9892	54.1536	0.3032	0.7617	0.0314	-0.0277	0.0547	22.1705	1.111	0.0209	0.0184	100.615	153.94	62.8727	0.627225
355	K9_L10C4	-0.1892	22.1465	53.5176	0.3963	0.6849	0.0052	0.0059	0.0273	22.0421	1.2788	-0.002	0.0061	100.111	155.99	63.2681	0.628474
355	K9_L10C4	0.0695	22.0687	53.4453	0.5069	0.6649	-0.0314	0.0277	0.0901	22.141	1.3784	-0.0104	-0.1106	100.393	158.04	63.112	0.625658
355	K9_L10C4	0.0294	22.0099	53.2312	0.4903	0.6932	-0.0052	0.0158	0.172	22.1674	1.2753	0.0274	0.0399	100.152	160.1	62.9864	0.62581
355	K9_L10C4	0.0106	21.8829	52.7382	0.5614	0.739	0.0314	0.0059	0.1256	22.2283	1.1016	-0.0183	-0.0154	99.425	162.15	62.7305	0.625606
355	K9_L10C4	-0.0024	22.0843	53.0411	0.5353	0.7293	-0.0209	-0.0158	0.0956	22.337	1.3251	0.0287	0.0461	100.222	164.2	62.8477	0.624413
355	K9_L10C4	-0.0035	22.0309	53.8982	0.5161	0.674	0.0419	0.0238	0.1394	22.3296	1.1257	-0.0072	0.0092	100.789	166.25	62.8698	0.625927
355	K9_L10C4	0.0212	21.9989	53.4877	0.5315	0.6578	0.0105	0.004	0.1448	22.1634	1.3905	0.0222	0.0706	100.503	168.31	63.0247	0.62457
355	K9_L10C4	0.0024	22.0107	52.744	0.5486	0.7398	-0.0314	0.0277	-0.0027	22.2596	1.2662	0.0111	-0.0553	99.61	170.36	62.834	0.624992
355	K9_L10C4	0.04	22.0264	53.3447	0.6058	0.7236	0.0576	-0.0337	0.0929	22.2409	1.2671	-0.0007	-0.0031	100.399	172.41	62.8904	0.625336
355	K9_L10C4	0.027	22.0605	53.872	0.549	0.6855	0.0105	-0.0059	0.071	22.0794	1.2135	0.0431	-0.1259	100.612	174.46	63.139	0.627854
355	K9_L10C4	0.0647	22.1097	52.8922	0.4379	0.7828	-0.0052	0.0059	0.0601	21.9553	1.2172	0.0294	0.0123	99.5675	176.51	63.1903	0.629582
355	K9_L10C4	0.0094	22.2265	53.1301	0.37	0.7228	-0.0052	0.0198	0.0793	21.8447	1.2967	0.0326	-0.0492	99.732	178.57	63.503	0.631112
355	K9_L10C4	0.027	22.199	53.2066	0.3335	0.7528	0.0052	-0.0158	0.0273	21.8823	1.1668	-0.0215	-0.0307	99.6007	180.62	63.397	0.631771
355	K9_L10C4	0.0247	22.1438	53.8705	0.3496	0.7409	0.0209	-0.0099	0.0273	22.0582	1.2581	-0.002	-0.043	100.494	182.67	63.1763	0.628494
355	K9_L10C4	0.0188	22.2869	53.323	0.3105	0.7456	0.0052	-0.004	0.0793	21.956	1.1816	-0.0007	-0.0123	99.9068	184.72	63.4233	0.631797
355	K9_L10C4	-0.02	22.2231	53.7118	0.4124	0.7158	0.0157	0.0059	0.0929	21.8499	1.2408	-0.0327	-0.0399	100.268	186.78	63.5033	0.631594
355	K9_L10C4	0.0259	22.1933	53.38	0.5282	0.6975	0.0157	0.0079	0.0492	22.0585	1.14	0.0235	-0.0768	100.12	188.83	63.2842	0.630211
355	K9_L10C4	0.0118	22.1851	53.1841	0.4738	0.7098	-0.0628	0.004	0.0601	22.1301	1.2605	-0.0189	0	100.019	190.88	63.1873	0.628186
355	K9_L10C4	0.0047	22.1174	53.5794	0.4173	0.7006	0.0157	0	0.0656	21.9671	1.3053	0.0026	-0.0092	100.176	192.93	63.2932	0.628649
355	K9_L10C4	0.0177	22.2176	53.1228	0.4575	0.8133	0.0157	0.0198	0.1803	22.0222	1.1931	-0.0085	-0.0983	100.06	194.98	63.1964	0.63029
355	K9_L10C4	0.0023	22.2686	53.8226	0.442	0.7046	-0.0157	0.0079	0.0656	22.0451	1.2375	0.0346	0.0031	100.634	197.04	63.3672	0.630145
355	K9_L10C4	0.0082	22.1231	53.4508	0.4736	0.7153	-0.0366	0.0198	0.0573	22.1783	1.2456	0.0378	-0.0553	100.31	199.09	63.0664	0.627202
355	K9_L10C4	0.0129	22.0766	53.3149	0.5345	0.7512	-0.0419	0.0119	0.1148	22.0834	1.1227	0.0091	-0.0031	100.032	201.14	63.0667	0.628907
355	K9_L10C4	0.0094	21.961	52.9608	0.574	1.1217	0.2194	0.0119	0.1476	22.0095	1.2347	-0.0072	-0.0737	100.25	203.19	62.5413	0.627283
355	K9_L10C4	0.0341	22.1071	53.0968	0.5696	0.7564	0.0941	-0.0079	0.1147	22.1606	1.193	0.0091	-0.0522	100.136	205.25	63.0143	0.627742
355	K9_L10C4	-0.0177	21.9907	53.0229	0.6583	0.7727	-0.0732	0.0317	0.1338	22.1832	1.1808	0.0248	-0.043	99.9988	207.3	62.8473	0.626405
355	K9_L10C4	-0.0106	22.0876	52.8295	0.6373	0.7326	0.0471	0.0059	0.0737	22.0503	1.3342	-0.0287	0.0061	99.8044	209.35	63.1359	0.627209
355	K9_L10C4	-0.0012	22.0124	53.2973	0.6166	0.7628	-0.0366	0.0178	0.1366	21.9637	1.1842	0.0176	0.0461	100.055	211.4	63.1051	0.628805
355	K9_L10C4	0.0377	22.0382	52.9474	0.6388	0.7135	-0.0105	-0.0079	0.0901	22.0908	1.2838	0.0293	-0.0338	99.8697	213.46	63.0676	0.62679
355	K9_L10C4	0.0298	20.4247	51.9125	0.8249	0.7054	0.0417	-0.0039	1.1922	23.0365	1.2607	0.0332	-0.0368	99.4614	215.51	60.3299	0.599592
355	K9_L10C4	0.0165	21.3596	53.715	0.6119	0.7418	0.0209	-0.0119	0.1365	22.3147	1.2395	0.0222	0.0153	100.194	217.56	62.0717	0.617647
355	K9_L10C4	0.0141	21.9463	53.2927	0.5608	0.7233	-0.0052	-0.0198	0.0819	22.0719	1.2725	0.0137	-0.0154	99.9771	219.61	62.9766	0.626116
355	K9_L10C4	0.0153	22.093	53.371	0.5987	0.7689	-0.0157	-0.0079	0.1202	22.1154	1.1514	0.0183	0.0737	100.326	221.66	63.0288	0.628467
355	K9_L10C4	0.0153	22.067	53.4433	0.5162	0.7233	0.0366	0.004	0.0792	22.0406	1.1192	-0.0561	-0.0553	100.045	223.72	63.1361	0.629272
355	K9_L10C16	2.7001	0.5356	78.6443	11.853	0.7165	0.1464	3.4597	0.5122	2.0295	-0.0245	0.0049	0	100.602	0	24.4666	0.322609
355	K9_L10C16	0.0669	20.4301	56.2893	3.1217	1.7756	0.1052	0.213	0.4538	17.5205	0.7372	-0.008	0.0308	100.744	2.29	64.7852	0.665956
355	K9_L10C16	0.0291	24.4166	55.1569	1.8639	1.5727	0.0211	0.014	0.2108	16.45	0.6791	-0.0214	-0.105	100.414	4.25	70.2125	0.717486
355	K9_L10C16	0.0437	24.5395	54.3589	1.8832	1.6215	-0.0158	0.0319	0.2301	16.8977	0.5746	-0.0247	0.0031	100.184	6.27	69.7454	0.71449
355	K9_L10C16	0.0213	24.6197	53.3067	2.0327	1.608	-0.0053	0.002	0.3573	16.7894	0.6189	0.0493	-0.0772	99.4053	8.32	69.954	0.715895
355	K9_L10C16	0.0279	24.6054	53.8422	2.4243	1.7091	0.0053	-0.006	0.2662	16.4856	0.5092	-0.006	0.0031	99.8783	10.37	70.1367	0.720657
355	K9_L10C16	0.0334	25.1739	53.722	2.1999	1.7507	0	0.0219	0.2887	16.1561	0.4977	0.0107	-0.0278	99.8549	12.43	70.9211	0.729253
355	K9_L10C16	0.0468	24.7436	53.4166	2.4233	1.8195	-0.0053	0.016	0.283	16.2065	0.5452	-0.016	-0.0031	99.5005	14.48	70.4082	0.72466
355	K9_L10C16	0.0093	22.1358	53.5814	1.0176	0.8259	-0.0157	-0.0059	0.0082	20.9285	1.0063	-0.0105	-0.0676	99.513	16.54	64.2173	0.64258
355	K9_L10C16	0.0271	21.7465	52.5961	0.6923	0.6855	0.0261	-0.0356	0.12	21.8306	1.4186	0.0202	0.0031	99.1661	18.6	63.0589	0.624912
355	K9_L10C16	-0.0047	21.6856	53.7669	0.564	0.7167	-0.0366	0.0099	0.112	21.952	1.1601	-0.0163	-0.0184	99.9671	20.67	62.8283	0.625673
355	K9_L10C16	0.0235	21.6942	52.6979	0.6823	0.6623	-0.0052	0.0376	0.1037	21.7342	1.331	-0.0189	-0.0092	98.9667	22.73	63.1325	0.626219
355	K9_L10C16	0	21.7125	53.2951	0.6698	0.7631	-0.0052	-0.0198	0.1611	21.7983	1.2544	0.0065	0.0246	99.6853	24.79	62.9537	0.626553
355	K9_L10C16	0.0387	21.8042	53.2055	0.6998	0.6924	-0.0209	0.0317	0.1065	21.8012	1.2105	-0.0013	-0.0061	99.5906	26.85	63.1417	0.62796
355	K9_L10C16	0.0129	21.8129	53.5688	0.7077	0.7149	0.0157	0.0079	0.0764	22.0122	1.3069	0.028	0.0215	100.286	28.91	62.906	0.624937
355	K9_L10C16	0.0094	21.9419	53.3315	0.6788	0.6779	-0.0105	0.0079	0.071	22.0444	1.1479	0.0143	-0.0552	99.925	30.98	63.0589	0.627613
355	K9_L10C16	0.0094	23.5426	51.7987	0.7105	0.7111	-0.0105	-0.0158	0.1229	21.7513	1.2398	-0.0117	0.0184	99.9046	33.04	64.9343	0.645899
355	K9_L10C16	0.0129	20.4581	51.1949	0.554	0.6353	0.0052	0.0455	0.1174	21.0436	1.1538	0.0235	0.0307	95.2749	35.1	62.5247	0.621468
355	K9_L10C16	0.0153	21.7507	53.3212	0.5204	0.7198	0.0209	-0.0059	0.0601	21.8238	1.3781	-0.0065	0.0092	99.6195	37.17	63.0253	0.625439
355	K9_L10C16	0.0082	21.6389	53.4147	0.5595	0.6725	-0.0105	0.0099	0.1065	21.8019	1.3544	-0.0039	0.0215	99.5879	39.23	62.9899	0.624695
355	K9_L10C16	0.0165	21.725	53.5187	0.6157	0.6874	-0.0105	0.0119	0.0846	22.0118	1.2393	-0.0111	0.0614	99.9722	41.29	62.848	0.624684
355	K9_L10C16	-0.0059	21.8582	53.1031	0.6852	0.7063	0	0.0218	0.0901	21.9343	1.151	-0.0072	0.0307	99.5808	43.36	63.0449	0.6278
355	K9_L10C16	0.027	21.8196	53.8773	0.6728	0.7562	-0.0209	0.002	0.1639	21.8728	1.2931	0.0157	0.0184	100.519	45.42	63.0013	0.626554
355	K9_L10C16	0.0153	21.7897	53.5321	0.6652	0.7294	0.0471	0	0.0737	22.0086	1.3105	-0.032	-0.0061	100.172	47.48	62.8659	0.624688
355	K9_L10C16	0.0176	21.7717	52.9857	0.7245	0.7433	0.0732	0.0059	0.0628	21.7689	1.3307	-0.0215	-0.0184	99.4843	49.55	63.0732	0.626705
355	K9_L10C16	0.027	21.7795	52.6374	0.7217	0.692	-0.0157	-0.0099	0.0901	21.7154	1.1978	0.0378	-0.0767	98.8987	51.61	63.204	0.628698
355	K9_L10C16	0.0047	21.8397	52.5795	0.6727	0.718	0.047	-0.0158	0.1201	21.7679	1.3335	-0.0098	-0.0245	99.0831	53.67	63.1801	0.627415
355	K9_L10C16	0.0094	21.8413	53.4161	0.6666	0.6739	0.0366	0.0158	0.0491	21.853	1.3511	0.03	-0.0276	99.9429	55.74	63.1525	0.626394
355	K9_L10C16	0.0165	21.9336	53.3885	0.6096	0.6935	0.0105	0.002	0.0819	22.1219	1.2037	-0.0156	0.043	100.105	57.8	62.9511	0.626178
355	K9_L10C16	0.007	21.92	52.8692	0.6509	0.6542	0.0627	0.002	0.0355	21.6938	1.3011	-0.0333	-0.0276	99.1964	59.86	63.4254	0.629355
355	K9_L10C16	0.02	21.9068	53.6354	0.7225	0.6866	-0.0471	-0.002	0.0901	21.8746	1.3514	-0.0026	-0.043	100.287	61.95	63.1834	0.626874
355	K9_L10C16	0.0035	21.9006	53.281	0.6259	0.7213	-0.0314	0.0198	0.0519	21.8998	1.192	-0.0085	0.0951	99.7908	64.02	63.1057	0.628181
355	K9_L10C16	0.0047	21.9514	53.3742	0.6209	0.6629	0.0418	-0.0178	0.0519	21.9541	1.2214	0.0313	-0.0491	99.9146	66.08	63.1805	0.627874
355	K9_L10C16	0.0223	22.0127	52.8613	0.6532	0.6517	0.0209	0.0059	0.1392	22.0633	1.2332	0.0489	-0.0031	99.7127	68.14	63.1488	0.627308
355	K9_L10C16	-0.0176	22.0232	52.9576	0.6382	0.6476	0.0523	-0.002	0.0246	22.0124	1.3093	0.0677	-0.0399	99.733	70.21	63.217	0.627157
355	K9_L10C16	0.0094	21.9037	53.128	0.6688	0.6375	0.0523	-0.0059	0.0655	21.9317	1.2949	-0.0293	0.0123	99.7042	72.27	63.186	0.626842
355	K9_L10C16	0.02	21.9731	53.0145	0.5688	0.669	0.0732	0.0336	0.0682	22.0212	1.339	-0.0261	-0.0031	99.7807	74.33	63.1272	0.626235
355	K9_L10C16	0.0317	21.9485	52.594	0.6402	0.647	0.0105	0.0317	0.0518	21.889	1.3862	-0.0124	0.0031	99.2337	76.39	63.2647	0.626819
355	K9_L10C16	-0.0047	21.9778	53.2274	0.6458	0.6337	-0.0784	-0.0415	0.0273	21.8667	1.3949	-0.0189	-0.0614	99.7735	78.46	63.336	0.627267
355	K9_L10C16	0.0047	21.9541	52.5977	0.6714	0.6603	-0.0157	0.0059	0.0846	21.9763	1.3006	-0.0137	0.0092	99.2648	80.52	63.1641	0.626873
355	K9_L10C16	-0.0141	22.0112	52.2079	0.6705	0.6493	-0.047	-0.0257	0.101	21.9116	1.2212	0.028	-0.0552	98.8007	82.59	63.3049	0.62894
355	K9_L10C16	0.0153	21.9893	52.8693	0.6118	0.7035	-0.0209	0.004	0.0709	21.9865	1.3329	-0.0182	0.0307	99.614	84.65	63.1347	0.626817
355	K9_L10C16	0.0282	22.0621	53.2487	0.684	0.678	-0.0157	-0.0178	0.0164	21.9535	1.2422	0.0176	-0.046	99.9307	86.71	63.2784	0.628843
355	K9_L10C16	0.0082	21.9174	53.131	0.5554	0.6417	0.0052	0.004	0.0737	21.8899	1.213	-0.0476	-0.0123	99.4395	88.78	63.2378	0.628246
355	K9_L10C16	0.0317	21.9767	52.8636	0.5907	0.6599	-0.0366	0.004	0.0983	22.0236	1.16	-0.0352	-0.0368	99.4085	90.84	63.1404	0.62807
355	K9_L10C16	0.0165	22.0655	52.7819	0.6782	0.6329	-0.0314	-0.0198	0.0109	21.9693	1.3273	-0.0287	0.0276	99.51	92.9	63.3247	0.627855
355	K9_L10C16	0.0129	21.9447	52.9048	0.6842	0.7009	0.0052	0.0079	0.0901	22.0317	1.0333	-0.0059	0.0338	99.4495	94.97	63.0448	0.628943
355	K9_L10C16	0.0165	22.1085	53.0506	0.5677	0.6487	-0.0314	0.002	0.0437	22.113	1.3275	-0.0098	0.0153	99.8934	97.03	63.2033	0.626872
355	K9_L10C16	0.0106	22.0249	53.4889	0.5897	0.6567	-0.0209	0.0238	0.1174	21.8506	1.3634	-0.0059	0.0061	100.132	99.09	63.372	0.628249
355	K9_L10C16	-0.0071	21.9762	52.9526	0.5606	0.6777	0.0261	0.002	0.131	21.9978	1.2185	0.0254	-0.0123	99.568	101.16	63.1429	0.627728
355	K9_L10C16	0.0176	21.9999	52.344	0.6274	0.6391	0.0209	-0.004	0.0928	21.9121	1.2155	0.0182	-0.0184	98.8876	103.22	63.3058	0.628873
355	K9_L10C16	0.027	21.9975	52.8441	0.5329	0.6819	0.0157	-0.0297	0.1119	21.9715	1.1453	-0.0209	0.0184	99.3463	105.28	63.1868	0.628966
355	K9_L10C16	0.0117	21.9945	53.2257	0.5339	0.7428	0.0732	0.0198	0.0656	21.8138	1.1985	0.0072	-0.0338	99.6867	107.35	63.2648	0.629983
355	K9_L10C16	0.0129	22.0259	52.9195	0.5971	0.6566	-0.068	0.0079	0.0082	21.8787	1.2331	0.0169	0.0951	99.4521	109.41	63.3445	0.629306
355	K9_L10C16	0.0306	22.0537	52.8765	0.5907	0.7109	-0.0052	-0.0099	0.101	21.8354	1.301	-0.0065	-0.0921	99.4999	111.47	63.3469	0.629343
355	K9_L10C16	0.0047	22.1008	52.842	0.5246	0.6876	0.0314	0.0416	0.0983	21.7909	1.1424	-0.0183	0.0737	99.3379	113.54	63.4724	0.631913
355	K9_L10C16	0.0353	21.9827	52.8152	0.5561	0.722	-0.0052	0.004	0.0737	21.8738	1.1949	0.0013	0.1473	99.4061	115.6	63.2183	0.629288
355	K9_L10C16	0.0094	22.0734	53.3331	0.5554	0.7744	0.0471	-0.0218	0.0929	21.7447	1.3637	0.0104	-0.0491	100.004	117.67	63.3772	0.629826
355	K9_L10C16	-0.0035	22.2121	52.0216	0.6227	0.7775	0.0157	-0.0099	0.0929	21.4612	1.1662	-0.0078	0.046	98.416	119.73	63.8086	0.636189
355	K9_L10C16	-0.0012	22.1083	52.0136	0.5666	0.7549	0.0052	0.0297	0.0682	21.7295	1.2626	0.0156	0.0215	98.5757	121.79	63.4549	0.631381
355	K9_L10C16	0.0153	22.0908	52.5911	0.599	0.7976	-0.0052	-0.0178	0.1065	21.731	1.2687	-0.0267	0.0644	99.2643	123.88	63.3791	0.631119
355	K9_L10C16	0.0059	22.0635	52.9809	0.5528	0.7373	0.0157	0.0158	0.1092	21.9584	1.1897	-0.0287	0.0583	99.6877	125.94	63.1976	0.629343
355	K9_L10C16	0.027	22.1215	52.2955	0.5633	0.7136	0.0418	0	0.142	21.7924	1.1043	0.015	0.0246	98.8411	128	63.4585	0.632507
355	K9_L10C16	0.0375	21.9815	52.9869	0.5045	0.7225	0.0262	-0.0059	0.1229	21.6332	1.1754	0.0072	-0.0215	99.1978	130.07	63.4627	0.631917
355	K9_L10C16	0.0035	22.2483	52.5237	0.5126	0.6842	-0.0209	0.0079	0.0465	21.7721	1.282	0	-0.0399	99.0809	132.13	63.6501	0.632221
355	K9_L10C16	0.0247	22.2362	53.2917	0.4771	0.6872	0.0052	0.0079	0.0601	21.9021	1.267	-0.0131	0.0061	99.9654	134.2	63.5011	0.63094
355	K9_L10C16	-0.0106	22.1419	53.6227	0.5341	0.7245	-0.0209	0	0.1394	21.7537	1.2115	0.0078	0.0461	100.182	136.26	63.5052	0.632013
355	K9_L10C16	-0.0223	22.1645	52.867	0.5285	0.6826	0.0366	0.0059	0.0957	21.8842	1.0401	-0.0013	-0.0584	99.305	138.32	63.4504	0.632687
355	K9_L10C16	0.0153	22.0376	53.0999	0.5972	0.7149	-0.0576	0.004	0.1312	21.8378	1.2171	0.017	-0.0399	99.6719	140.39	63.3223	0.630006
355	K9_L10C16	0	22.1318	53.6509	0.5535	0.7212	0.0262	-0.0119	0.1367	21.7213	1.2023	-0.0059	0.0123	100.156	142.45	63.532	0.63233
355	K9_L10C16	0.027	22.126	52.8542	0.5132	0.7509	-0.0418	0.002	0.1229	21.7477	1.1961	0.0333	-0.0092	99.3733	144.51	63.4601	0.632065
355	K9_L10C16	0.0211	21.3801	51.1227	0.6959	2.2212	0.8326	-0.0099	0.0329	21.0907	1.2181	-0.0098	0.0491	98.6645	146.58	61.4225	0.630608
355	K9_L10C16	0	22.1782	52.4981	0.5485	0.7354	0.047	-0.0198	0.1201	21.965	1.2541	0.0248	-0.0276	99.3712	148.64	63.3139	0.629831
355	K9_L10C16	0.007	22.0596	53.3151	0.5504	0.7549	-0.0262	0.0218	0.0929	21.8131	1.1312	-0.0202	-0.0031	99.746	150.7	63.3184	0.631369
355	K9_L10C16	0.0235	22.097	52.7282	0.5101	0.7027	0.0052	-0.0376	0.0546	21.826	1.2665	0.0144	-0.0031	99.2282	152.77	63.4128	0.630248
355	K9_L10C16	0.0082	22.2056	53.0679	0.5199	0.7099	0.0209	0.0554	0.0765	21.9785	1.1073	-0.0052	0.0675	99.8177	154.83	63.362	0.631477
355	K9_L10C16	0.0165	22.1748	52.8415	0.484	0.6789	-0.0262	-0.0059	0.1147	21.9274	1.2691	-0.0039	-0.0798	99.5068	156.89	63.422	0.63002
355	K9_L10C16	0.0164	22.098	53.1917	0.6018	0.6717	0.0261	-0.0158	0.1338	21.9534	1.213	0.0137	0.0153	99.9349	158.96	63.3244	0.629521
355	K9_L10C16	0.0247	22.09	52.9179	0.5414	0.6687	-0.0366	-0.0297	0.0765	21.9766	1.2574	0.0052	-0.0368	99.5583	161.02	63.2963	0.628751
355	K9_L10C16	-0.0129	22.1255	52.9169	0.457	0.6655	0.0366	0.0238	0.0191	21.7412	1.2956	0.0098	-0.0184	99.2909	163.08	63.5781	0.631106
355	K9_L10C16	0.0153	22.1991	52.9139	0.4424	0.6583	0.0209	0.0218	0.0764	21.9189	1.2602	-0.0078	0.0031	99.5304	165.15	63.483	0.630451
355	K9_L10C16	0.0094	22.1662	53.1977	0.4656	0.667	0.0052	0.0396	0.1394	21.8001	1.2588	-0.0065	0.0277	99.7767	167.21	63.5585	0.631316
355	K9_L10C16	0.0023	22.0953	53.338	0.4764	0.6978	-0.0105	-0.0079	0.1721	21.8332	1.1543	-0.0026	0.0829	99.8523	169.28	63.4101	0.631305
355	K9_L10C16	-0.02	22.1301	53.0416	0.4999	0.6245	-0.0105	0.0277	0.0874	21.8425	1.2042	0.0059	0.0307	99.4944	171.34	63.533	0.631066
355	K9_L10C16	0.0047	22.1993	52.9851	0.406	0.6447	0.0157	0.0119	0.0791	21.8327	1.3128	0.045	-0.043	99.537	173.4	63.5889	0.630784
355	K9_L10C16	0.0235	22.1106	53.2647	0.4158	0.6833	-0.0157	-0.0158	0.0656	21.8993	1.1167	-0.0157	0.0184	99.5979	175.47	63.3776	0.631183
355	K9_L10C16	0.0082	22.1187	53.2295	0.4701	0.6544	-0.0209	-0.0198	0.0737	21.8346	1.3516	0.0143	0.0215	99.7767	177.53	63.49	0.629522
355	K9_L10C16	-0.0071	22.1699	52.513	0.4196	0.6581	0.0052	0.0198	0.1911	21.9219	1.2187	-0.002	-0.0246	99.1173	179.59	63.4497	0.630537
355	K9_L10C16	0.0106	22.1795	53.3525	0.4522	0.6028	-0.0105	-0.0059	0.082	21.8931	1.1872	-0.0072	0.0706	99.8304	181.66	63.5614	0.631249
355	K9_L10C16	-0.0047	22.0984	52.9751	0.4816	0.7104	0.0261	0.0198	0.0956	21.8225	1.2014	0.0098	0	99.4407	183.72	63.4078	0.630963
355	K9_L11C16	4.0957	0.1571	69.4585	18.3885	3.9011	0.3705	2.6535	0.314	1.1126	-0.0092	0.0078	-0.0281	100.459	0	4.38205	0.20244
355	K9_L11C16	1.4476	9.3202	54.9221	5.3168	5.1574	3.6274	2.0051	0.3879	11.5938	0.5277	0.017	0.0185	94.3414	2.03	47.72	0.57803
355	K9_L11C16	0.0295	23.7824	52.3386	1.2229	1.7068	0.042	-0.0099	0.2844	17.8107	0.742	-0.0053	-0.0586	97.9594	4.06	67.9482	0.69548
355	K9_L11C16	0.0126	23.9733	51.3549	1.2551	1.3967	-0.021	0.0139	0.1348	19.0034	0.8024	0.0218	0.0154	97.9842	6.09	67.2691	0.683195
355	K9_L11C16	0.0118	21.7825	51.6988	0.7355	0.6531	-0.0052	-0.0218	0.0737	22.4154	1.2664	-0.0046	0.0707	98.7077	8.12	62.5452	0.620992
355	K9_L11C16	0.0425	21.8421	52.0408	0.4764	0.6604	-0.0052	-0.0059	0.0709	22.2326	1.3009	0.0339	0.0184	98.7188	10.15	62.7843	0.623106
355	K9_L11C16	0.0094	22.0723	51.5959	0.5659	0.7154	0.0209	-0.0119	0.0818	21.9869	1.1975	0.0208	-0.0614	98.267	12.17	63.2064	0.62907
355	K9_L11C16	0.0342	22.0597	52.3439	0.62	0.7444	0.0105	0.0515	0.1311	22.2106	1.1927	0.0176	-0.0123	99.416	14.2	62.9293	0.626743
355	K9_L11C16	0.0047	21.9529	51.217	0.7764	0.6773	-0.0261	0.0376	0.21	22.2523	1.2414	-0.0039	-0.0337	98.3696	16.23	62.8607	0.624698
355	K9_L11C16	0.013	21.7885	51.8523	0.6294	0.7307	0.047	0.0178	0.1336	22.2444	1.2792	-0.0176	0	98.7358	18.26	62.6239	0.622631
355	K9_L11C16	0.0118	21.9965	51.7106	0.6734	0.6902	-0.0105	0.0356	0.1091	22.2574	1.1769	-0.0111	-0.043	98.6616	20.29	62.8852	0.625764
355	K9_L11C16	0.033	21.9869	51.5295	0.6258	0.7078	0.0366	0	0.0655	22.1821	1.198	-0.0065	0.0153	98.3805	22.32	62.9283	0.626201
355	K9_L11C16	-0.0012	21.9596	51.8012	0.584	0.7411	0.0366	0.0198	0.1091	22.4193	1.2177	0.0455	0.0061	98.94	24.35	62.6177	0.623347
355	K9_L11C16	-0.0047	21.8491	51.8723	0.6099	0.7159	0.0052	0.0316	0.1582	22.1644	1.2972	-0.0325	0.0583	98.7621	26.38	62.7889	0.6239
355	K9_L11C16	0.0283	22.0813	51.7799	0.6144	0.7334	0.0052	0.0317	0.0983	22.2356	1.1781	0.0574	0.0031	98.8467	28.41	62.9412	0.62687
355	K9_L11C16	-0.0106	21.9385	51.5196	0.5757	0.7468	-0.0157	0.0198	0.0573	22.2461	1.0677	-0.0098	-0.0061	98.1713	30.44	62.7618	0.626366
355	K9_L11C16	-0.0012	22.0642	52.1662	0.6478	0.7892	-0.0157	0.0277	0.1691	22.1831	1.3121	0	-0.0521	99.3594	32.47	62.904	0.625859
355	K9_L11C16	0.0118	21.8676	51.4824	0.701	0.7223	-0.0157	0.0198	0.1036	22.0494	1.2031	0.0208	0.046	98.2278	34.5	62.9169	0.626207
355	K9_L11C16	0.0259	21.9578	52.0253	0.7534	0.7452	0.0261	-0.0138	0.1282	22.0987	1.2239	-0.0352	0.0614	99.0459	36.52	62.9333	0.626464
355	K9_L11C16	0.0024	22.0067	51.9356	0.8043	0.7806	0.0157	0.0277	0.1118	22.0843	1.1943	0.0163	-0.0337	98.9796	38.55	62.9538	0.627429
355	K9_L11C16	0.0141	22.0174	51.71	0.7423	0.7064	-0.0209	0.002	0.1281	22.1563	1.2765	0.0098	0.0153	98.7782	40.58	62.9885	0.625989
355	K9_L11C16	0.0118	21.8819	51.8618	0.6842	0.7529	-0.0104	0	0.1282	22.185	1.2119	0.0059	0.0583	98.7818	42.61	62.7552	0.62491
355	K9_L11C16	0.0541	22.0251	51.7367	0.7223	0.7488	0.0261	0.0138	0.0682	21.944	1.0301	0.013	0.0276	98.41	44.64	63.1567	0.630716
355	K9_L11C16	0.0165	22.0195	52.1935	0.6591	0.7347	0.0523	0.0198	0.1638	22.0206	1.1217	-0.0183	-0.0123	99.0014	46.67	63.0914	0.628945
355	K9_L11C16	0.0133	16.1428	47.5944	0.7468	0.7516	-0.0104	-0.0079	0.1385	21.8223	1.0585	0.0103	0.0123	88.2907	48.7	55.8089	0.55691
355	K9_L11C16	0.0223	24.1504	49.9311	0.6949	0.7527	-0.0261	-0.0257	0.071	21.8889	1.1717	0.002	-0.0061	98.6848	50.73	65.3227	0.651031
355	K9_L11C16	0.0141	22.1785	51.8437	0.6912	0.6911	0.0157	-0.0198	0.1119	22.0376	1.1006	0.0117	0.0245	98.7207	52.76	63.2981	0.630666
355	K9_L11C16	0.0023	21.7451	53.8042	0.676	0.7697	-0.0105	0.0158	0.0656	22.0113	1.113	-0.0104	0.0583	100.261	54.79	62.7628	0.626197
355	K9_L11C16	0.006	19.7486	40.351	0.7958	0.6727	-0.0104	0.0079	0.1085	20.3849	1.2275	0.0161	-0.0092	83.319	56.81	62.3616	0.619431
355	K9_L11C16	0.0282	22.2706	51.8504	0.7078	0.7098	0.0104	0.0119	0.0682	21.9873	1.2445	-0.0026	0.0276	98.9167	58.84	63.421	0.630673
355	K9_L11C16	0.0094	22.1717	51.1837	0.9182	0.7889	0.0105	0.0277	0.0601	21.8105	1.0978	-0.013	-0.0215	98.0784	60.87	63.3944	0.632917
355	K9_L11C16	-0.0163	21.231	50.7803	4.5692	0.7301	0.0523	0	0.1176	20.9461	1.1085	-0.0046	-0.0583	99.5352	62.9	63.3641	0.63166
355	K9_L11C16	0.0224	22.1644	51.71	0.6815	0.7703	0.0366	-0.004	0.1091	22.0791	1.1855	-0.0234	-0.0675	98.7589	64.93	63.1388	0.629238
355	K9_L11C16	0.0071	22.0968	52.4493	0.6935	0.7306	0.0157	-0.004	0.1065	21.9999	1.136	0.0072	-0.0644	99.2423	66.96	63.1993	0.629825
355	K9_L11C16	0.0153	22.2744	51.4522	0.6523	0.7395	0.0104	-0.0138	0.1173	22.1039	1.1972	0.0143	0.0276	98.6044	68.99	63.2687	0.630026
355	K9_L11C16	-0.0082	22.3148	51.7492	0.6533	0.7732	0.0314	-0.0257	0.0983	21.849	1.0743	0.0267	0.0368	98.607	71.02	63.5249	0.634262
355	K9_L11C16	-0.0141	22.2906	52.2948	0.6409	0.774	-0.0052	-0.0158	0.1638	21.796	1.1983	0.0046	-0.0031	99.1631	73.05	63.5525	0.633277
355	K9_L11C16	0.0247	22.2534	52.0359	0.6496	0.7987	-0.0052	-0.0237	0.0246	21.8013	1.1305	-0.0111	0.043	98.7616	75.08	63.4763	0.633529
355	K9_L11C16	0.0082	22.1296	52.4243	0.6575	0.7353	0.0418	-0.002	0.1528	22.0451	1.2422	-0.0228	0.0399	99.4767	77.11	63.1819	0.628637
355	K9_L11C16	0.0177	22.144	52.1203	0.6461	0.8195	0.0366	0.0336	0.2757	21.8909	1.1804	-0.0274	0.0982	99.2631	79.14	63.2439	0.630967
355	K9_L11C16	0.0165	22.1764	51.8908	0.6497	0.7234	0.0418	-0.0079	0.06	21.961	1.1682	-0.0137	0.0276	98.7155	81.17	63.3316	0.630726
355	K9_L11C16	0.0212	22.2068	51.4314	0.6767	0.7601	-0.0104	-0.0119	0.1118	21.8036	1.2327	-0.0085	-0.0552	98.2443	83.19	63.4756	0.631973
355	K9_L11C16	0.0188	22.1314	51.7591	0.739	0.7635	-0.0104	-0.002	0.0682	21.8726	1.2447	-0.0078	0.0399	98.6371	85.22	63.3221	0.630363
355	K9_L11C16	0.007	21.6473	52.4639	0.8232	0.7239	0.0262	0.0139	0.0874	21.333	1.2457	-0.017	-0.0614	98.3714	87.25	63.4163	0.630699
355	K9_L11C16	0.0141	22.1059	51.499	0.703	0.7341	0.0052	-0.002	0.12	21.9557	1.2504	-0.0124	-0.0061	98.3874	89.28	63.2491	0.6292
355	K9_L11C16	0.0082	22.1306	52.2005	0.7342	0.7606	0.0052	0.0099	0.0738	21.9146	1.22	-0.0509	0.0184	99.0762	91.31	63.2823	0.630184
355	K9_L11C16	0.0141	22.1804	51.0589	0.7251	0.7793	0.0052	-0.0218	0.0737	21.7302	1.1978	-0.0059	0.0307	97.7953	93.34	63.4978	0.632796
355	K9_L11C16	0.0164	22.0194	51.6188	0.6594	0.7971	0.0575	0.0178	0	21.696	1.0717	-0.0209	-0.0153	97.9542	95.37	63.3404	0.632748
355	K9_L11C16	0.0153	22.1904	51.4341	0.6892	0.8165	-0.0157	0.0297	0.1448	21.9096	1.1226	0.0261	0.0522	98.4305	97.4	63.2775	0.631857
355	K9_L11C16	-0.0059	22.09	51.9038	0.84	0.8007	0.0314	-0.0119	0.1257	21.8424	1.1992	-0.0117	0.0399	98.8732	99.43	63.2608	0.630696
355	K9_L11C16	0.0259	22.0133	50.9616	0.9031	0.8543	0.0209	0.0297	0.0464	21.7367	1.1184	-0.0156	0.0276	97.7377	101.46	63.2176	0.631788
355	K9_L11C16	0.0082	22.0065	51.6586	1.1002	0.818	-0.0679	0	0.1146	21.8863	1.2685	-0.0059	0.0736	98.9346	103.48	63.1056	0.628662
355	K9_L12C6	3.136	0.4805	76.5162	13.034	1.1394	0.0597	3.297	0.4005	1.5396	0.0888	-0.0071	0.0125	99.7042	0	22.2133	0.344529
355	K9_L12C6	0.1524	10.4042	67.6275	6.9687	0.8963	-0.0266	1.4217	0.5088	13.882	0.497	-0.0054	0.13	102.488	2.25	55.2354	0.563172
355	K9_L12C6	0.0317	23.9654	54.1105	1.0555	1.5547	-0.0053	0.006	0.2653	17.8232	0.7455	0.0053	0.0031	99.5662	4.15	68.3135	0.696919
355	K9_L12C6	0.0413	23.7934	53.757	0.7287	1.2796	0.0315	-0.0139	0.2177	19.0389	1.0556	-0.0026	0.0123	99.9559	6.12	67.2248	0.67838
355	K9_L12C6	-0.0222	22.3647	53.0269	0.5856	0.8489	-0.0052	-0.002	0.0493	20.968	1.0863	0.0052	0.0431	98.9781	8.11	64.3816	0.643685
355	K9_L12C6	0.0154	21.258	52.2833	0.589	0.7427	-0.0052	-0.0119	0.2152	22.769	1.2812	-0.0045	0.0491	99.2028	10.11	61.5014	0.611579
355	K9_L12C6	0.0166	21.1966	53.1003	0.6587	0.6963	-0.0209	-0.0079	0.0981	22.7065	1.247	0.0033	0.0092	99.7326	12.12	61.555	0.611853
355	K9_L12C6	0.0379	21.2338	52.9824	0.6907	0.6902	-0.0314	0.0178	0.2346	22.7609	1.2889	0.0052	-0.0061	99.9423	14.12	61.5498	0.611312
355	K9_L12C6	0.0189	21.388	52.6972	0.6913	0.7568	-0.0209	0.0218	0.06	22.4857	1.2865	0.0176	0.0338	99.4576	16.13	61.9112	0.615778
355	K9_L12C6	0.013	21.5548	52.7598	0.6104	0.7464	0.0209	-0.0099	0.1556	22.4067	1.2127	0.0124	-0.0276	99.4926	18.14	62.187	0.619145
355	K9_L12C6	0.0189	21.5855	52.7467	0.7062	0.8372	-0.0052	-0.0119	0.1611	22.3291	1.39	-0.0345	0.0061	99.7808	20.15	62.1815	0.618465
355	K9_L12C6	0.0331	21.607	52.1234	0.6889	0.8095	0	-0.0059	0.1529	22.3445	1.1894	0.0228	-0.0031	98.9715	22.16	62.2251	0.620572
355	K9_L12C6	0.0047	21.6808	52.6101	0.6108	0.8413	-0.0105	0.0435	0.1147	22.3581	1.163	-0.0039	-0.0461	99.427	24.17	62.2507	0.621506
355	K9_L12C6	0.0201	21.7838	52.5482	0.6805	0.7642	0.0157	-0.0158	0.0546	22.2402	1.2545	-0.0104	-0.0369	99.3618	26.18	62.5798	0.622872
355	K9_L12C6	0.0212	21.7688	52.6168	0.6456	0.7566	0.0575	0.0119	0.0929	22.1924	1.1224	0.0267	-0.0246	99.313	28.2	62.6217	0.62453
355	K9_L12C6	0.0366	21.7319	52.4156	0.6521	0.6973	0.0052	-0.0079	0.1146	22.2592	1.1827	0.0013	-0.0706	99.0964	30.21	62.5913	0.622849
355	K9_L12C6	0.0413	21.6554	52.7543	0.7832	0.7195	-0.0157	0.004	0.1365	22.3651	1.1184	0.0052	-0.0061	99.5828	32.22	62.373	0.621612
355	K9_L12C6	0.0071	21.7554	52.5678	0.6099	0.7321	-0.0314	-0.002	0.1721	22.286	1.1754	0.028	0.1045	99.4382	34.23	62.5445	0.622908
355	K9_L12C6	0.0188	21.7408	53.2056	0.6775	0.6877	0.0157	0.0198	0.0847	22.1469	1.2427	0.0111	0.0491	99.9005	36.24	62.7271	0.623461
355	K9_L12C6	0.0059	21.8219	52.2336	0.6824	0.7303	0	0.0158	0.0409	22.2793	1.3473	-0.0039	-0.089	99.1573	38.25	62.625	0.621956
355	K9_L12C6	-0.0094	21.7976	53.0414	0.5921	0.7199	-0.0418	0.0158	0.142	22.125	1.2603	-0.0333	-0.043	99.6941	40.27	62.7685	0.624115
355	K9_L12C6	0.0047	21.8492	52.6947	0.609	0.7223	-0.0314	-0.0475	0.1283	22.1052	1.1661	0.0469	0.0368	99.3634	42.28	62.8407	0.625826
355	K9_L12C6	0.0082	21.8143	52.9616	0.5722	0.7521	-0.0314	-0.0119	0.1311	22.0257	1.2632	0.0235	0.0215	99.5732	44.29	62.8453	0.625262
355	K9_L12C6	0.0165	21.8814	52.4413	0.6159	0.7129	-0.0366	0.0059	0.1391	22.2771	1.1826	-0.0104	0.046	99.3188	46.3	62.7134	0.62428
355	K9_L12C6	-0.0024	21.9288	52.4425	0.6196	0.6819	0.0261	0.0099	0.0873	22.1668	1.2984	-0.0117	-0.0246	99.2615	48.31	62.9156	0.624718
355	K9_L12C6	0.0142	21.839	52.3218	0.7033	0.6694	0.0052	-0.0297	0.1227	22.3803	1.1676	0.0228	0.0215	99.2678	50.33	62.6202	0.622946
355	K9_L12C6	0.0024	21.7778	52.8769	0.6708	0.7493	-0.0209	-0.0297	0.1446	22.181	1.2565	-0.0039	0.0061	99.6653	52.34	62.6524	0.623379
355	K9_L12C6	0.0412	21.8873	52.7513	0.5937	0.6998	0.0261	0.0099	0.0982	22.0211	1.18	-0.0039	-0.0276	99.3086	54.35	62.996	0.626938
355	K9_L12C6	0.0153	21.9796	52.4237	0.6162	0.7144	0.0209	-0.0257	0.0819	22.0663	1.2102	0.0267	0.0368	99.1922	56.36	63.0292	0.62716
355	K9_L12C6	0.013	21.9787	52.4896	0.6637	0.6705	-0.0209	0.0257	0.1146	22.1531	1.2976	0.0137	0.0276	99.4478	58.38	62.9973	0.625395
355	K9_L12C6	0.02	21.8221	52.1634	0.6851	0.6914	0.0209	0.0099	0.1282	22.1437	1.2087	0.0267	0.0644	98.9846	60.39	62.8128	0.624715
355	K9_L12C6	0.0094	21.7177	52.379	0.6967	0.7577	0.0366	-0.002	0.1256	22.0799	1.2426	-0.0202	0.043	99.0881	62.4	62.6792	0.623886
355	K9_L12C6	0.0189	21.8259	51.796	0.6912	0.7537	0.0052	0.0099	0.1609	22.3724	1.2709	0.0312	0	98.9361	64.41	62.5055	0.621843
355	K9_L12C6	0.0024	21.8113	51.8681	0.8027	0.7486	0.0261	0.0375	0.1417	22.2102	1.3317	-0.0046	0.1165	99.0969	66.43	62.6597	0.622687
355	K9_L12C6	0.0153	21.8491	52.7455	0.8073	0.7812	0.0471	0.0238	0.0765	22.1804	1.22	-0.0085	0.0154	99.7615	68.44	62.6882	0.624522
355	K9_L12C6	0.0177	21.935	52.2534	0.714	0.6827	-0.0052	0.0079	0.0464	22.2854	1.1656	-0.002	-0.0123	99.1081	70.45	62.8013	0.624943
355	K9_L12C6	0.0611	21.8712	52.9274	0.6821	0.7208	-0.0157	0.0059	0.0682	22.1026	1.0971	-0.0254	-0.0153	99.5364	72.46	62.8687	0.626791
355	K9_L12C6	0.0507	21.7869	52.4378	0.6948	0.7553	-0.0209	0	0.12	22.1542	1.2619	-0.0098	0.0982	99.3597	74.48	62.6815	0.623691
355	K9_L12C6	0.0283	21.7059	51.8127	0.7502	0.7454	0.0679	0.0178	0.0518	22.263	1.1061	0.0098	-0.0828	98.5589	76.49	62.4971	0.623308
355	K9_L12C6	0.0035	21.7253	52.321	0.7281	0.7556	0.0366	0.0257	0.1582	22.3673	1.1741	-0.0039	-0.0614	99.2955	78.5	62.3998	0.621784
355	K9_L12C6	0.0448	21.688	52.5417	0.7653	0.7426	-0.0522	0.0217	0.0872	22.4104	1.1908	0.0163	-0.092	99.5089	80.51	62.3329	0.620781
355	K9_L12C6	0.0555	21.6777	51.1694	0.7525	0.7416	0.0157	-0.0119	0.1308	22.1652	1.2496	0.015	-0.0491	97.973	82.53	62.5705	0.622525
355	K9_L12C6	0.0201	21.7125	51.9735	0.8179	0.8101	0	-0.0178	0.101	22.2538	1.3009	0.0059	0.0399	99.0355	84.54	62.43	0.621496
355	K9_L12C6	0.0412	21.6478	52.3499	0.8907	0.7509	0.0157	0	0.1228	22.282	1.1035	0.0241	-0.0092	99.2285	86.55	62.408	0.622514
355	K9_L12C6	0.0306	21.7328	52.3389	0.8545	0.7987	-0.0418	0.0158	0.161	22.1738	1.2504	0.0046	0.0552	99.4163	88.58	62.5473	0.623027
355	K9_L12C6	0.0319	21.6964	53.1048	0.7619	0.7172	0.0993	0.0059	0.1883	22.4467	1.3099	0.0072	-0.0675	100.37	90.59	62.3382	0.619312
355	K9_L12C6	0.0083	21.7237	52.1835	0.8014	0.7067	0.0157	0.0059	0.1146	22.4477	1.2947	0.0228	0.0368	99.3617	92.6	62.3803	0.619751
355	K9_L12C6	0.0141	21.8321	52.71	0.7654	0.7145	0.0157	0.0119	0.1828	22.3332	1.2062	0.0332	0.0399	99.8589	94.62	62.6021	0.622952
355	K9_L12C6	0.0412	21.9113	52.9021	0.7058	0.7105	0.0366	0.0178	0.1309	22.2694	1.2914	-0.0104	-0.0337	100.017	96.63	62.7562	0.623578
355	K9_L12C6	0.0224	21.8383	52.443	0.6605	0.6928	-0.0418	0.0099	0.06	22.3448	1.0712	-0.0046	0.0276	99.1705	98.64	62.625	0.624269
355	K9_L12C6	0.0165	21.7892	52.5269	0.7606	0.6934	0.0052	0.0237	0.0873	22.1484	1.3478	0	-0.0215	99.399	100.65	62.7702	0.622903
355	K9_L12C6	-0.0012	21.7776	52.0262	0.7184	0.7222	0.0052	0.0178	0.0845	22.2058	1.2736	0.0254	0.0491	98.9058	102.67	62.6622	0.622955
355	K9_L12C6	0.0472	21.8022	52.7405	0.6618	0.7344	-0.0366	-0.004	0.1146	22.3289	1.3303	0.0182	-0.0092	99.7782	104.68	62.5486	0.621422
355	K9_L12C6	0.0401	21.8232	52.1162	0.7236	0.7051	-0.0261	0.0059	0.1309	22.3299	1.1652	-0.0104	0.0123	99.0524	106.69	62.608	0.623304
355	K9_L12C6	0.0389	21.745	52.9051	0.7249	0.7121	0	-0.0237	0.139	22.495	1.2195	-0.0111	0.0337	100.013	108.7	62.3488	0.620268
355	K9_L12C6	0.0047	21.8051	52.2972	0.6538	0.6842	0.0157	0.0059	0.1008	22.3918	1.2436	-0.0026	-0.0491	99.203	110.71	62.5532	0.6217
355	K9_L12C6	0.0378	21.8103	52.345	0.6065	0.6912	-0.0052	0.0079	0.1528	22.4135	1.1626	-0.0072	-0.0092	99.2275	112.73	62.5279	0.622357
355	K9_L12C6	0.0177	21.7754	51.831	0.6763	0.6678	0	0.0237	0.2045	22.4956	1.2412	0.0091	0.0184	98.9606	114.74	62.438	0.620373
355	K9_L12C6	0.0342	21.9023	52.4051	0.7529	0.6943	0	0.0099	0.1417	22.4497	1.279	-0.0202	0.0092	99.6783	116.75	62.5862	0.621816
355	K9_L12C6	-0.0083	21.7597	52.7406	0.7428	0.6729	0	0	0.1364	22.4362	1.3184	0.0319	-0.0184	99.8389	118.76	62.4742	0.620017
355	K9_L12C6	0.0389	21.8193	52.042	0.7321	0.635	-0.0052	-0.0218	0.0818	22.3617	1.1915	-0.0215	0	98.9024	120.78	62.6623	0.622679
355	K9_L12C6	0.0483	21.8683	51.9092	0.6778	0.6044	0.0209	-0.0079	0.1582	22.227	1.0916	0.0085	0.0368	98.651	122.79	62.8907	0.625564
355	K9_L12C6	0.0342	21.9957	52.2966	0.6972	0.6312	-0.0209	-0.002	0.1282	22.1437	1.2627	0.0182	0	99.2077	124.8	63.0758	0.626023
355	K9_L12C6	0.0365	21.9144	52.5855	0.5929	0.6456	0.0366	-0.0218	0.0846	22.1902	1.2746	0.0091	0.0184	99.3884	126.81	62.9237	0.624571
355	K9_L12C6	0.0236	21.9332	52.502	0.7349	0.621	0.0314	-0.0099	0.1064	22.2334	1.2155	0.0228	-0.0307	99.424	128.83	62.9318	0.624938
355	K9_L12C6	0.0471	21.9435	52.3681	0.7613	0.6613	0.0157	0.0336	0.0901	22.1431	1.2215	0.0046	0.0092	99.2991	130.84	62.982	0.625891
355	K9_L12C6	0.0094	21.8242	52.5447	0.7034	0.677	-0.0105	-0.0059	0.1119	22.316	1.1507	0.0007	-0.0737	99.338	132.85	62.6594	0.6236
355	K9_L12C6	0.0342	21.9486	52.6088	0.7496	0.6475	0.0679	0.0119	0.1664	22.3468	1.2207	-0.0052	-0.0951	99.8022	134.86	62.7993	0.62392
355	K9_L12C6	0.0224	21.9078	52.4341	0.6969	0.6682	0.0209	0.0218	0.0546	22.2116	1.2475	0.0169	-0.0522	99.3027	136.88	62.8656	0.624561
355	K9_L12C6	0.0177	21.9158	53.1035	0.6943	0.6549	0.0261	-0.0336	0.1146	22.3545	1.2125	-0.0007	0.0153	100.109	138.89	62.7471	0.623575
355	K9_L12C6	0.0177	21.9027	52.7697	0.7938	0.618	-0.0366	-0.0139	0.071	22.3521	1.1242	0.0065	0.0368	99.6925	140.9	62.7832	0.62435
355	K9_L12C6	0.0201	21.8156	52.7537	0.7952	0.6333	-0.0418	-0.0079	0.1118	22.4355	1.2854	-0.0039	-0.0245	99.8505	142.91	62.5861	0.620959
355	K9_L12C6	0.0165	21.8712	52.1649	0.8336	0.6812	0.0052	0.0079	0.09	22.1427	1.2676	-0.0273	0.0429	99.1239	144.93	62.8795	0.624654
355	K9_L12C6	0.0212	21.9811	51.9756	0.7224	0.6661	-0.0157	0.0277	0.06	22.4585	1.2348	-0.0559	0.0123	99.1597	146.94	62.6976	0.623016
355	K9_L12C6	0.0259	21.9541	52.8554	0.7773	0.6264	0.0261	0.0099	0.1773	22.3905	1.1799	0.0339	0.043	100.1	148.95	62.7884	0.623955
355	K9_L12C6	0.0035	21.9239	52.6926	0.8347	0.672	-0.0261	0.0198	0.0982	22.2272	1.2151	0.0195	0.0552	99.7617	150.96	62.8621	0.624905
355	K9_L12C6	0.0106	21.9777	52.8027	0.6453	0.6801	0	0.0257	0.0409	22.1215	1.2565	0.0033	-0.089	99.5644	152.98	63.0158	0.626117
355	K9_L12C6	0.0106	22.0495	52.8223	0.7491	0.6366	-0.0209	0.0059	0.1255	22.1456	1.2388	-0.0313	-0.0552	99.7839	154.99	63.1238	0.626818
355	K9_L12C6	0.0259	22.0283	52.7638	0.715	0.6487	0.0105	-0.004	0.0737	22.2199	1.2009	-0.0384	-0.0522	99.6867	157	63.0105	0.626234
355	K9_L12C6	0.0153	22.025	52.7036	0.6886	0.671	-0.0418	0	0.1201	22.0975	1.2692	0.0183	-0.0276	99.6085	159.01	63.102	0.626731
355	K9_L12C6	0.0329	22.0936	52.6842	0.771	0.6644	-0.0471	0.0099	0.0409	22.1279	1.2448	0.0072	-0.0614	99.6768	161.03	63.1521	0.627401
355	K9_L12C6	0.0141	21.9708	52.4372	0.8713	0.684	-0.0105	-0.0178	0.1555	22.071	1.2685	0.002	-0.0031	99.4743	163.04	63.0546	0.626427
355	K9_L12C6	0.0164	21.9579	53.1245	0.7629	0.6888	-0.047	0.002	0.1256	22.034	1.2244	0.0052	0.0338	99.9755	165.05	63.0723	0.627109
355	K9_L12C6	0.0553	21.9877	52.7669	0.7772	0.6391	0.0575	0	0.161	22.1008	1.304	-0.0371	-0.0276	99.8494	167.06	63.1007	0.625949
355	K9_L12C6	-0.0294	21.9302	52.648	0.8052	0.6791	-0.0157	-0.0178	0.2101	22.1892	1.2653	-0.0221	-0.0368	99.727	169.08	62.898	0.624844
355	K9_L12C6	0.02	21.9118	52.5166	0.9365	0.7151	-0.0313	-0.0277	0.2018	22.203	1.1973	-0.0234	0	99.702	171.09	62.8178	0.625198
355	K9_L12C6	0.0283	21.9533	52.1888	0.9759	0.6647	0.0366	-0.0237	0.1936	22.3674	1.2531	0	0.0092	99.6708	173.1	62.7614	0.623439
355	K9_L12C6	0.0377	21.9215	52.4512	0.9172	0.6617	-0.0366	0.0277	0.1555	22.0898	1.2767	-0.0124	-0.0736	99.5389	175.11	63.0122	0.62563
355	K9_L12C11	2.8914	0.215	79.091	12.113	0.7447	0.0813	3.7322	0.5008	1.4461	0.0612	-0.0127	0.025	100.902	0	13.7689	0.202634
355	K9_L12C11	0.1201	16.7535	61.3372	4.2981	2.0897	0.2002	0.7578	0.3085	15.8587	0.7301	0.0248	0.0339	102.513	2	61.7025	0.64276
355	K9_L12C11	0.0406	23.8484	53.9881	1.9877	1.7536	-0.0053	0.0099	0.3317	17.5248	0.7009	-0.0086	-0.0308	100.186	4	68.2552	0.69982
355	K9_L12C11	0.0705	24.4202	53.4329	2.3721	1.7872	-0.0316	-0.008	0.3213	16.6727	0.583	-0.004	0.0062	99.6659	6.01	69.6566	0.716036
355	K9_L12C11	0.038	24.74	53.5711	2.1953	1.8902	0.0263	0.0239	0.3604	16.4291	0.5745	0.0307	-0.0154	99.8796	8.01	70.0549	0.72164
355	K9_L12C11	0.0034	24.8344	54.0806	1.8337	1.9781	0.0105	-0.0458	0.3218	16.423	0.5271	-0.0087	-0.0587	100.013	10.01	70.0166	0.723043
355	K9_L12C11	0.0239	23.0523	54.0588	1.5749	1.8139	-0.0315	-0.006	0.2788	18.3811	0.6556	-0.0073	0	99.8393	12.01	66.4951	0.683305
355	K9_L12C11	0.0447	23.1819	53.9748	1.0237	1.51	-0.0052	0.0258	0.1734	19.1105	0.755	0.0205	0.04	99.8603	14.02	66.2566	0.675233
355	K9_L12C11	0.0153	21.3879	53.276	0.748	0.7161	-0.0418	0.0415	0.1582	22.0936	1.2299	-0.0241	0.0061	99.6727	16.02	62.361	0.62028
355	K9_L12C11	0.0094	21.5772	53.5102	0.6643	0.777	-0.047	-0.0237	0.1856	22.0921	1.1655	0	-0.0092	99.9812	18.02	62.4898	0.623026
355	K9_L12C11	-0.013	21.58	53.3086	0.6155	0.7539	0.0731	-0.0079	0.1337	22.2133	1.2386	-0.0111	0.0215	99.938	20.02	62.4	0.621092
355	K9_L12C11	0.0142	21.2662	52.5581	0.8874	0.8131	0.0157	0.0237	0.0928	22.2425	1.2034	-0.0475	0.0184	99.1354	22.03	61.9491	0.617704
355	K9_L12C11	0.0106	21.3655	53.7158	0.7229	0.7808	0.0627	0.0119	0.0573	22.3309	1.1268	-0.043	0.0215	100.207	24.03	62.0114	0.618695
355	K9_L12C11	0.02	21.5776	53.3214	0.7499	0.7829	0.0209	0.002	0.1418	22.0948	1.262	-0.0254	0.0184	99.9916	26.03	62.4798	0.622018
355	K9_L12C11	0.0153	21.4749	53.5192	0.8352	0.7395	0.0366	0.0079	0.15	22.3352	1.2558	-0.0033	0.0552	100.425	28.03	62.1807	0.618547
355	K9_L12C11	0.0436	21.5588	53.1854	0.8394	0.8118	0.0052	-0.0198	0.1063	22.3785	1.2291	-0.0091	-0.0736	100.158	30.03	62.1355	0.619304
355	K9_L12C11	0.0342	21.6788	53.9426	0.7204	0.7632	-0.0157	0.0158	0.0982	22.4659	1.2264	-0.0013	-0.0675	100.945	32.04	62.2408	0.619769
355	K9_L12C11	0.0365	21.6013	53.6454	0.6544	0.7362	0.0209	0.0059	0.1691	22.2443	1.182	-0.0026	-0.0766	100.296	34.04	62.4147	0.621588
355	K9_L12C11	-0.0047	21.5585	53.4585	0.8471	0.7109	-0.0209	0.0198	0.0954	22.4775	1.2583	0.015	0.0521	100.493	36.04	62.1656	0.61802
355	K9_L12C11	0.0318	21.6272	52.9688	0.8549	0.6849	-0.0157	0.0198	0.1254	22.4849	1.2111	-0.0332	0.0705	100.079	38.04	62.2664	0.619173
355	K9_L12C11	0.0024	21.6047	53.2478	0.7505	0.6078	-0.0679	-0.0178	0.0627	22.266	1.3551	-0.0358	-0.0889	99.8967	40.05	62.5632	0.619655
355	K9_L12C11	-0.0047	21.6477	53.0434	0.8036	0.6486	0.0574	0.002	0.0518	22.4351	1.3786	-0.013	-0.0092	100.068	42.05	62.3857	0.618207
355	K5_L1C2	4.7375	0.0377	74.2201	18.2178	4.2388	-0.0113	0.461	0.1023	0.9454	-0.0249	0.0229	0.0444	103.028	0	1.04299	0.0680609
355	K5_L1C2	5.5976	0.2728	59.9651	26.4335	8.2379	0.0221	0.4458	0.0699	1.2849	0.0216	-0.0152	0.0189	102.37	2.02	3.94538	0.271202
355	K5_L1C2	2.7012	11.676	56.393	11.0225	4.1088	0.0163	0.2357	0.1861	14.0653	0.5739	-0.0322	0.0156	100.995	4.04	51.8481	0.586952
355	K5_L1C2	0.0644	23.0745	52.5269	2.7417	1.728	0.0761	0.0271	0.3294	17.5383	0.7176	0.0376	0.028	98.8894	6.06	67.5575	0.692489
355	K5_L1C2	0.0235	24.1679	53.0816	2.4454	1.7202	0.0109	0.0271	0.2295	16.7442	0.6107	-0.0072	0.0561	99.1171	8.08	69.4527	0.712744
355	K5_L1C2	0.0153	21.3024	53.4838	0.5152	0.6794	-0.0541	-0.0228	0.1214	21.8302	1.2861	-0.0178	-0.0899	99.2337	10.1	62.5855	0.621429
355	K5_L1C2	-0.0071	21.2743	53.1955	0.6161	0.6445	-0.0054	-0.0083	0.0358	22.0371	1.3213	0.007	0.062	99.1935	12.12	62.3876	0.61866
355	K5_L1C2	0.0082	21.198	53.1629	0.7857	0.6918	0.0378	0.0083	0.113	22.088	1.336	-0.0159	0.0186	99.4483	14.14	62.189	0.617149
355	K5_L1C2	0.0212	21.2754	53.022	0.5643	0.7257	-0.0162	0.0021	0.1323	21.8532	1.4672	-0.0057	0.0681	99.1316	16.16	62.4709	0.619038
355	K5_L1C2	0.0118	21.3904	52.9817	0.6277	0.8207	0.0432	0.0083	0.113	21.941	1.4523	-0.0019	-0.062	99.3901	18.18	62.3827	0.619575
355	K5_L1C2	0.0188	21.4073	52.7142	0.6489	0.7356	0.0757	0.0373	0.1434	21.8704	1.2532	0.0223	-0.0341	98.9271	20.2	62.585	0.622514
355	K5_L1C2	0.0118	21.2235	51.6558	0.929	0.7489	0.0378	0.0207	0.0882	21.9668	1.2198	-0.0025	-0.0062	97.9023	22.22	62.2664	0.619849
355	K5_L1C2	0.0212	21.3845	52.1447	0.833	0.6821	0.0432	0.0311	0.1295	22.0694	1.1691	0	-0.0217	98.5078	24.24	62.4264	0.621109
355	K5_L1C2	0.0141	21.361	52.9609	0.6906	0.7959	0.0162	0.0124	0.1406	21.8144	1.3276	-0.0407	-0.0465	99.1338	26.26	62.5125	0.621808
355	K5_L1C2	0.0305	21.3714	53.0504	0.6563	0.8241	0.0216	-0.0332	0.0965	21.8295	1.3513	-0.021	0.0093	99.241	28.28	62.4714	0.621526
355	K5_L1C2	0.007	21.5074	53.0098	0.5077	0.801	-0.0108	0.027	0.1186	21.8012	1.2027	0.0127	-0.0775	98.9951	30.3	62.6793	0.624833
355	K5_L1C2	-0.0035	21.424	52.603	0.571	0.8084	-0.0325	0.0187	0.1104	21.6549	1.1763	-0.0286	0.0031	98.3698	32.32	62.729	0.62569
355	K5_L1C2	0.0117	21.4771	52.7156	0.6636	0.8469	-0.027	-0.027	0.0855	21.73	1.289	0.0503	0.0837	98.9535	34.34	62.659	0.624337
355	K5_L1C2	-0.0152	21.5339	53.4235	0.5218	0.7837	0	0.0021	0.0663	21.7276	1.1079	-0.0401	-0.0217	99.1668	36.37	62.8063	0.626853
355	K5_L1C2	0.0223	21.6207	53.0456	0.5777	0.8026	-0.0108	-0.0041	0.1324	21.7882	1.2684	-0.0401	-0.0465	99.2579	38.39	62.8133	0.625519
355	K5_L1C2	0.0235	21.5675	52.5041	0.7371	0.7722	-0.0162	0.0145	0.0635	21.7913	1.1673	0.0305	-0.0031	98.6715	40.41	62.7925	0.625952
355	K5_L1C2	0.0235	21.5034	52.4519	0.7092	0.8059	-0.0487	0.029	-0.0055	21.752	1.2116	0.0324	0.0031	98.522	42.43	62.7189	0.625199
355	K5_L1C2	0.0164	21.6392	52.923	0.6392	0.786	0.0379	0.0083	0.0911	21.6646	1.2181	-0.0452	0.0217	99.0454	44.45	62.9819	0.627496
355	K5_L1C2	-0.0035	21.5572	52.6011	0.612	0.7511	0.0108	-0.0187	0.1104	21.7088	1.1969	-0.0083	-0.0527	98.5484	46.47	62.8939	0.626376
355	K5_L1C2	0.0281	21.7114	52.6256	0.6123	0.7995	-0.0216	0.0041	0.0938	21.7244	1.2	-0.0127	0.0527	98.852	48.49	62.9804	0.627852
355	K5_L1C2	0.0199	21.7029	53.0975	0.5955	0.807	-0.0054	-0.0083	0.1132	21.7706	1.1228	0.0299	-0.0403	99.2593	50.51	62.9141	0.628087
355	K5_L1C2	0.0023	21.624	53	0.5921	0.7595	0	-0.0187	0.0635	21.7155	1.1049	0.0038	-0.0186	98.8656	52.53	62.9481	0.627984
355	K5_L1C2	0.0035	21.6486	52.6158	0.5862	0.7185	0.0541	0.0332	0.0635	21.6709	1.1469	0.0356	0.0031	98.5801	54.55	63.0746	0.62827
355	K5_L1C2	0	21.5783	52.556	0.701	0.7591	-0.0649	-0.0124	0.1517	21.7386	1.1612	0.0248	0.0093	98.68	56.57	62.8755	0.62667
355	K5_L1C2	0.0434	21.5638	52.7811	0.6993	0.7618	-0.0649	0.0124	0.0635	21.7009	1.2121	-0.0013	0.0124	98.8505	58.59	62.895	0.626372
355	K5_L1C2	0.007	21.5093	53.1721	0.6421	0.7536	-0.0162	-0.0228	0.0938	21.7603	1.3042	-0.0095	-0.0496	99.2423	60.61	62.7856	0.624224
355	K5_L1C2	0.0141	21.6793	52.7692	0.5941	0.7656	0.027	0.029	0.0524	21.6323	1.3219	-0.0445	0.0589	98.9438	62.63	63.0852	0.627187
355	K5_L1C2	0.0304	21.6098	52.8064	0.6294	0.7308	0.0704	0.0021	0.1105	21.4749	1.0638	-0.0076	0.0248	98.5533	64.65	63.2192	0.630731
355	K5_L1C2	0.0047	21.6565	52.9216	0.5499	0.7668	0	-0.027	0.0966	21.4549	1.1647	-0.0191	-0.0434	98.6157	66.67	63.2423	0.630387
355	K5_L1C2	0.0141	21.6999	52.8747	0.6298	0.8228	-0.0054	-0.0021	0.1131	21.6985	1.2296	-0.0127	-0.1022	99.0825	68.69	62.964	0.627687
355	K5_L1C2	0.048	21.714	52.5953	0.6721	0.7648	0.0433	-0.0498	0.1462	21.6755	1.2268	-0.0095	-0.0217	98.886	70.71	63.079	0.628102
355	K5_L1C2	-0.0035	21.602	52.5655	0.7221	0.7526	0.0162	-0.0041	0.1517	21.6843	1.1851	-0.0388	0.0031	98.6827	72.73	62.9655	0.627234
355	K5_L1C2	0.0316	21.7113	52.6456	0.6671	0.8193	0.0325	-0.0062	0.0028	21.419	1.272	-0.0076	0.0372	98.6383	74.75	63.2686	0.630228
355	K5_L1C2	0.0211	21.6847	52.1885	0.6433	0.8132	0.0162	0.0373	0.0773	21.5141	1.1702	-0.0471	0.0589	98.2247	76.77	63.1499	0.630024
355	K5_L1C2	-0.0023	21.7153	52.8456	0.6816	0.8344	0.0325	0.0311	0.0773	21.5497	1.3762	0.0108	-0.0372	99.1546	78.79	63.1181	0.627856
355	K5_L1C2	0	21.8233	52.8722	0.6088	0.7546	0.0108	-0.0124	0.0607	21.5579	1.2809	0.0255	0.0093	99.0041	80.81	63.3303	0.629914
355	K5_L1C2	-0.0012	21.691	52.9227	0.6601	0.8749	-0.0325	-0.029	0.0967	21.4179	1.2812	-0.0013	0.0403	98.9846	82.83	63.1744	0.629925
355	K5_L1C2	0.0199	21.6888	52.7876	0.644	0.7893	-0.0487	-0.0041	0.0883	21.3986	1.281	-0.0108	-0.0062	98.6974	84.85	63.3054	0.630102
355	K5_L1C2	0.0327	21.7858	53.1516	0.6522	0.7614	-0.0108	-0.0042	0.0359	21.5523	1.1263	-0.0019	-0.0217	99.0981	86.87	63.2872	0.631172
355	K5_L1C2	-0.0059	21.8094	52.4955	0.6369	0.7038	0.0054	0.0021	0.0718	21.4733	1.248	0.0159	-0.0465	98.462	88.89	63.4702	0.630971
355	K5_L1C2	0.0597	21.7649	52.5938	0.6835	0.7917	0.0162	-0.0083	0.116	21.4017	1.29	0.0057	0.0124	98.7356	90.91	63.3804	0.630793
355	K5_L1C2	0.0082	21.763	52.4046	0.6398	0.7287	0.0325	0.0187	0.1187	21.4908	1.1943	0	-0.0031	98.3993	92.93	63.3697	0.630853
355	K5_L1C2	0.007	21.7557	52.8033	0.5955	0.7346	-0.0271	-0.0062	0.174	21.2987	1.1501	-0.0159	-0.0651	98.5188	94.95	63.5535	0.633214
355	K5_L1C2	0.0375	21.9166	52.6977	0.6206	0.7401	0.0162	0	0.1435	21.4836	1.2481	-0.0369	-0.0496	98.904	96.97	63.5251	0.632005
355	K5_L1C2	0.007	21.8734	52.7217	0.6689	0.7436	-0.0541	-0.0125	0.1187	21.4401	1.1472	-0.0242	0.0155	98.736	98.99	63.5197	0.63304
355	K5_L1C2	0.0059	21.8352	52.6437	0.6576	0.7247	-0.0108	0.0373	0.1242	21.4669	1.2331	-0.0465	0.0279	98.7565	101.02	63.4765	0.631466
355	K5_L1C2	0.0292	21.7918	52.7793	0.623	0.7159	0.0379	0.0062	0.1132	21.3915	1.1199	0.0121	0.0341	98.6541	103.04	63.5203	0.632957
355	K5_L1C2	-0.0012	21.7009	53.1426	0.5708	0.7348	0.0758	-0.0291	0.0801	21.3559	1.2217	0.0115	0.0868	98.9809	105.06	63.4352	0.631289
355	K5_L1C2	-0.007	21.68	52.6992	0.7384	0.7361	0.0054	-0.0083	0.1132	21.418	1.1555	0.0382	-0.1333	98.584	107.08	63.3466	0.631116
355	K5_L1C2	0.007	21.6246	53.2092	0.731	0.7266	0	0.0062	0.0525	21.5449	1.2067	0.0223	0	99.131	109.1	63.1682	0.628681
355	K5_L1C2	0.0023	21.6882	52.8929	0.7333	0.7545	-0.0054	0.0124	0.1242	21.5303	1.2329	-0.0032	-0.0868	98.9711	111.12	63.2146	0.629245
355	K5_L1C2	0.0292	21.8305	52.6986	0.6802	0.7145	-0.0217	0.0104	0.0966	21.3352	1.2246	0.0306	0.031	98.6815	113.14	63.6218	0.632857
355	K5_L1C2	0.0164	21.7588	52.9804	0.6134	0.7096	-0.0271	-0.0021	0.1021	21.4198	1.2751	0.0204	-0.0434	98.896	115.16	63.4642	0.630697
355	K5_L1C2	0.0222	21.7459	52.5095	0.7159	0.7622	-0.0217	-0.0125	0.1353	21.2359	1.2368	0.0057	0.0341	98.4035	117.18	63.5717	0.632851
355	K5_L1C2	0.0129	21.6942	52.5561	0.6838	0.7336	0.0595	0	0.069	21.614	1.2716	0.0013	-0.0806	98.696	119.2	63.1623	0.628053
355	K5_L1C2	0.0059	21.6612	52.6626	0.6509	0.7071	0.0162	-0.0187	0.0911	21.4643	1.2242	-0.0146	-0.062	98.4834	121.22	63.317	0.629721
355	K5_L1C2	0.0164	21.5415	52.8798	0.7374	0.7662	0.0325	0.0374	0.1132	21.3275	1.1381	-0.0064	-0.062	98.5899	123.24	63.2517	0.630741
355	K5_L1C2	0.0246	21.6093	52.696	0.7203	0.74	0	-0.0145	0.1214	21.4482	1.236	-0.0032	0.0558	98.6516	125.26	63.2342	0.629204
355	K5_L1C2	0.0012	21.5424	52.4462	0.6573	0.6911	0.0217	0.0042	0.0607	21.374	1.2245	0.0299	0	98.0531	127.28	63.3045	0.629365
355	K5_L2C1	2.4429	0.1806	78.0244	10.5314	0.4058	0.0953	3.9453	0.4945	1.7658	0.0371	0.0214	-0.0663	97.9446	0	12.3457	0.151474
355	K5_L2C1	0.9851	11.2529	63.9045	6.3506	0.795	0.0275	2.3428	0.3065	10.8831	0.7871	-0.0106	0.025	97.6601	2.25	62.7615	0.631992
355	K5_L2C1	0.0094	22.0232	52.3261	0.6573	0.7767	-0.0054	0.027	0.091	21.8912	1.2741	-0.0114	-0.0155	99.0759	4.15	63.1721	0.628733
355	K5_L2C1	-0.0188	21.7855	52.0998	0.7059	0.7565	0.0216	0	0.0772	21.9321	1.122	-0.0216	0.0465	98.5473	6.12	62.9039	0.627341
355	K5_L2C1	0.0012	21.8256	52.0737	0.7091	0.7016	0	-0.0083	0.1268	21.8872	1.2201	-0.014	0.0093	98.5545	8.11	63.0644	0.627219
355	K5_L2C1	0.0387	21.8148	52.7834	0.6206	0.7657	0.0216	0.0394	0.0166	21.8713	1.2415	0.0102	0.0372	99.2611	10.11	62.9852	0.627045
355	K5_L2C1	0.0246	21.9148	52.7682	0.5605	0.7975	-0.0216	0.0083	0.0745	21.6234	1.1946	-0.021	0.0155	98.982	12.12	63.3036	0.631112
355	K5_L2C1	0.0117	22.1421	52.6025	0.4958	0.8711	-0.0379	0.0062	0.1077	21.358	1.1175	0.0064	0.0496	98.7686	14.12	63.7185	0.637023
355	K5_L2C1	0.0012	22.0745	52.5174	0.5806	0.88	0.0054	-0.0145	0.0331	21.4222	1.2546	-0.0115	0.062	98.8309	16.13	63.57	0.634233
355	K5_L2C1	0.0117	22.2448	52.2994	0.5383	0.8713	0.0271	0.0436	0.1216	21.1609	1.1029	-0.0083	0.031	98.4525	18.14	64.0283	0.640275
355	K5_L2C1	0.0047	21.9499	52.0072	1.0733	1.1114	-0.0379	0.0166	0.199	21.2091	1.1179	0.0102	-0.031	98.6993	20.15	63.3532	0.636539
355	K5_L2C1	0.0047	21.9045	52.2331	1.2474	1.1202	0.0649	-0.0187	0.2211	21.2484	1.1267	-0.0013	-0.0589	99.171	22.16	63.2533	0.63556
355	K5_L2C1	0.0093	21.7982	51.6279	1.4464	1.0459	-0.027	-0.0041	0.1686	21.2334	1.0938	0.0395	0.0372	98.5003	24.17	63.2534	0.634934
355	K5_L2C1	0.0512	21.8348	52.1435	1.1703	1.5367	-0.0216	-0.0041	0.1661	20.944	0.9368	0.0377	-0.0062	98.8212	26.18	62.945	0.640007
355	K5_L2C1	-0.0163	22.3976	52.0295	0.6201	0.859	0.0216	-0.0104	0.1492	21.0635	1.2639	-0.0083	-0.0031	98.4043	28.19	64.3028	0.641174
355	K5_L2C1	0.0338	22.2237	53.0677	0.6155	0.7069	0.0217	-0.0125	0.1271	21.2287	1.0644	-0.0089	0.0372	99.1267	30.21	64.1545	0.639759
355	K5_L2C1	0.0012	22.0661	52.6419	0.7007	0.7531	0.0216	0.0062	0.1243	21.5475	1.1677	-0.0102	0.1054	99.1357	32.22	63.5995	0.633764
355	K5_L2C1	0	22.0212	52.3687	0.6295	0.7145	0.0325	0.0208	0.138	21.6127	1.141	0.0038	0.0279	98.7106	34.23	63.5362	0.632901
355	K5_L2C1	0.007	21.9339	52.5351	0.6732	0.7384	-0.0108	0	0.1187	21.6719	1.3045	0.0057	0.0682	99.0566	36.24	63.3518	0.62969
355	K5_L2C1	-0.0071	21.7924	52.7198	0.6827	0.6793	0.0054	0.0041	0.1296	22.0139	1.2474	0.0197	-0.0651	99.2944	38.25	62.9287	0.625306
355	K5_L2C1	0.0411	21.655	52.743	0.7375	0.6851	0.0216	-0.0207	0.08	22.117	1.1135	0.0108	-0.0062	99.2047	40.27	62.6684	0.624151
355	K5_L2C1	-0.0176	21.4956	52.2033	0.8272	0.6234	0.0162	0.0062	0.1296	22.0805	1.1902	0	-0.062	98.5722	42.28	62.6134	0.622
355	K5_L2C1	0.0118	21.4804	51.9868	0.9199	0.6638	0.0162	-0.0104	0.1654	22.0902	1.1339	-0.0222	0.0031	98.4715	44.29	62.534	0.622312
355	K5_L2C1	0.0447	21.5109	51.804	0.789	0.6089	-0.0162	0.0373	0.1378	22.052	1.2914	0.0083	0.0062	98.2905	46.3	62.6783	0.621421
355	K5_L2C1	-0.0094	21.4455	52.3286	0.8655	0.5927	0.0541	0.0104	0.0992	22.2196	1.0885	-0.0057	-0.0495	98.7039	48.31	62.4568	0.621087
355	K5_L2C1	0.04	21.554	52.0049	0.7367	0.6988	0.0054	0.027	0.1269	21.9571	1.0718	-0.0331	0.0217	98.2442	50.33	62.7043	0.625102
355	K5_L2C1	0.0306	21.5561	52.4493	0.5802	0.7091	0.0216	0.0041	0.1407	21.9334	1.2205	-0.0032	-0.0527	98.6456	52.34	62.7173	0.623837
355	K5_L2C1	0.0223	21.4827	52.9919	0.5631	0.7287	-0.0271	0.027	0.1131	21.9422	1.1793	-0.0095	0.0093	99.0596	54.35	62.6028	0.623371
355	K5_L2C1	0.0129	21.6393	52.8799	0.5539	0.7792	-0.0108	-0.0021	0.08	22.0034	1.304	0.0394	-0.0217	99.2921	56.36	62.6444	0.623181
355	K5_L2C1	0.027	21.5365	53.0573	0.6315	0.7257	0.0325	0.0208	0.0524	22.0506	1.0601	-0.0006	0.0868	99.2812	58.38	62.5546	0.624083
355	K5_L2C1	0.0329	21.4433	52.491	0.6255	0.77	-0.0162	0.0332	0.127	21.9359	1.0842	0.0019	-0.0589	98.5449	60.39	62.5122	0.623983
355	K5_L2C1	-0.0024	21.445	52.5362	0.6382	0.7599	0.0324	0.0436	0.1407	21.9757	1.2594	-0.014	0.0186	98.8497	62.4	62.4866	0.621797
355	K5_L2C1	0.0423	21.4301	52.7946	0.599	0.775	-0.0216	0.0104	0.0911	21.7458	1.1886	-0.0115	-0.0713	98.6768	64.41	62.6861	0.624699
355	K5_L2C1	0.0504	21.7093	52.7902	0.3965	0.7797	0.0216	0.0021	0.0994	21.6989	1.2512	-0.0223	-0.0186	98.7994	66.43	63.0303	0.627561
355	K5_L2C1	0.0364	21.7406	52.9417	0.3867	0.7645	0.0162	0.0187	0.1022	21.7815	1.2127	0.0395	0	99.0406	68.44	62.9992	0.627454
355	K5_L2C1	0.0141	21.6993	53.2378	0.4708	0.8603	0.0162	-0.0291	0.0525	21.7455	1.0463	0.0204	-0.0248	99.1632	70.45	62.8661	0.629096
355	K5_L2C1	0.0482	21.632	52.7848	0.4533	0.7882	0.0162	0.0021	0.0993	21.8151	1.3252	0.0089	-0.0186	98.9732	72.46	62.8168	0.624786
355	K5_L2C1	0.0445	21.6977	52.8655	0.4693	0.7757	0.0054	-0.0021	0.1215	21.5575	1.2394	-0.0121	0.0496	98.8261	74.48	63.1687	0.629001
355	K5_L2C1	-0.0047	21.7078	53.9191	0.483	0.7913	-0.0379	-0.0353	0.0718	21.7771	1.2694	-0.0274	0.0434	100.063	76.49	62.9333	0.626563
355	K5_L2C1	0.0234	21.7085	53.352	0.445	0.7606	-0.0434	0.0187	0.0249	21.6884	1.1363	0.0261	-0.0248	99.1839	78.5	63.0654	0.628846
355	K5_L2C1	0.0388	21.6439	52.6224	0.5072	0.8193	-0.0108	0.0187	0.0386	21.7808	1.2602	0.0344	0.0434	98.8076	80.51	62.824	0.62593
355	K5_L2C1	0.0152	21.6864	52.7098	0.5604	0.8455	-0.065	-0.0208	0.0829	21.5677	1.24	0.0127	-0.0093	98.7206	82.53	63.0539	0.628769
355	K5_L2C1	0.0152	21.6174	53.237	0.6603	0.8098	0.0379	-0.027	0.1878	21.7532	1.2668	-0.0127	0.0062	99.5916	84.54	62.8361	0.625856
355	K5_L2C1	0.0176	21.5912	52.9646	0.5943	0.7512	-0.0271	0	-0.0083	21.6955	1.1653	0.0331	0.031	98.8438	86.55	62.9442	0.627208
355	K5_L2C1	0.0176	21.6272	53.0662	0.578	0.7716	-0.0325	-0.0062	0.1325	21.6958	1.2839	0.0255	0.1147	99.3129	88.56	62.9558	0.626369
355	K5_L2C1	0.0293	21.6553	52.8653	0.6206	0.7867	0.0054	-0.0166	0.152	21.7491	1.1268	-0.0051	-0.0527	98.9905	90.58	62.9115	0.627752
355	K5_L2C1	0.0188	21.605	52.6368	0.6385	0.7756	-0.0271	0.0124	0.1021	21.7882	1.254	0.0439	-0.0744	98.8754	92.59	62.8318	0.625497
355	K5_L2C1	0.0516	21.6385	52.7283	0.6756	0.7556	0.0108	0	0.0856	21.6227	1.305	-0.0089	0.0186	98.8922	94.6	63.0644	0.627019
355	K5_L2C1	0.0246	21.6364	53.016	0.7189	0.742	-0.0162	0.0208	0.1408	21.7452	1.1055	0.0115	-0.0279	99.1617	96.61	62.954	0.627808
355	K5_L2C1	0.0411	21.4876	52.5368	0.6563	0.8143	0	-0.0207	0.0635	21.7973	1.2063	-0.0089	0.0806	98.6837	98.63	62.6442	0.624619
355	K5_L2C1	0.0364	21.5661	52.6951	0.7246	0.7669	0.0325	-0.0208	0.058	21.7955	1.0615	-0.0051	0.0062	98.7429	100.64	62.7936	0.626988
355	K5_L2C1	0.0176	21.4997	52.6654	0.7344	0.7508	0.0433	-0.0187	0.094	21.758	1.0735	-0.007	-0.0372	98.6367	102.65	62.7813	0.626526
355	K5_L2C1	-0.0012	21.5409	52.7797	0.7715	0.7124	0.0487	-0.0228	0.0718	21.8498	1.1801	0.0057	-0.0682	98.9605	104.66	62.7822	0.624936
355	K5_L2C1	0.0188	21.4794	52.7469	0.7454	0.7643	-0.0271	0.0166	0.0608	21.7751	1.1388	0.0076	-0.0248	98.7537	106.68	62.7238	0.625454
355	K5_L2C1	0.0247	21.5262	52.9538	0.8091	0.7606	-0.0108	-0.0125	0.1659	21.7939	1.2082	0.0108	0.0373	99.2905	108.69	62.7603	0.625055
355	K5_L2C1	0.0153	21.5516	52.9682	0.8124	0.7717	0	0.0021	0.0193	21.9253	1.2583	0.0115	-0.0186	99.3357	110.7	62.6387	0.623483
355	K5_L2C1	0.0012	21.5455	52.9973	0.6934	0.7564	0.0217	0.0083	0.1769	21.7232	1.1811	0.0025	-0.0372	99.1074	112.72	62.8594	0.626266
355	K5_L2C1	0.0317	21.525	52.6948	0.7119	0.8032	0	-0.0166	0.1216	21.7975	1.1004	-0.0076	0.0621	98.8483	114.73	62.6993	0.626119
355	K5_L2C1	0.0529	21.5315	52.6498	0.5608	0.784	0.0108	0.0104	0.1381	21.7639	1.3264	-0.0057	-0.0124	98.8285	116.74	62.766	0.624201
355	K5_L2C1	0.0106	21.5069	52.7963	0.5832	0.784	0.0163	0.0291	0.0802	21.5951	1.1424	0.0057	-0.0435	98.5497	118.75	62.9131	0.62756
355	K5_L2C1	0.0293	21.6787	52.7487	0.7104	0.7823	-0.0325	0	0.0995	21.8577	1.0438	0.0013	0.0031	98.9547	120.76	62.8314	0.627754
355	K5_L2C1	0.0047	21.6012	52.8748	0.6758	0.7702	0.0217	0.0042	0.1133	21.6914	1.1483	-0.0312	-0.0124	98.9056	122.78	62.9342	0.627534
355	K5_L2C1	0.027	21.6449	52.7163	0.6191	0.8176	0.0542	-0.0166	0.0746	21.4798	1.2941	0.0178	-0.0745	98.7454	124.79	63.1368	0.628661
355	K5_L2C1	0.0445	21.7165	53.1584	0.4694	0.8185	0.0542	-0.0187	0.0912	21.5911	1.2258	0.0383	-0.0062	99.2079	126.8	63.0977	0.629
355	K5_L2C1	0.0082	21.7388	52.9934	0.494	0.8429	-0.0271	-0.0042	0.0415	21.5551	1.2468	-0.0223	-0.0186	98.9206	128.82	63.1265	0.62939
355	K5_L2C1	0.0235	21.6491	52.4565	0.6796	0.8889	0.0758	0.0166	0.1189	21.5894	1.1664	-0.0121	-0.0404	98.6647	130.83	62.9344	0.628908
355	K5_L2C1	0.0293	21.6122	52.8973	0.6322	0.8543	0.0163	-0.0083	0.1023	21.5961	1.2561	0.0153	0.0404	99.0518	132.84	62.9332	0.627511
355	K5_L2C1	0.0434	21.6449	52.9599	0.6644	0.8123	0.0488	0.0145	0.0636	21.6049	1.0916	0.0242	-0.0745	98.9724	134.85	63.0148	0.629481
355	K5_L2C1	-0.0082	21.5614	52.7778	0.6771	1.2247	-0.0108	0.0083	0.0664	21.3321	1.1821	0.0121	-0.0714	98.8421	136.87	62.6625	0.630447
355	K5_L2C1	0.0387	21.4414	53.1712	0.8091	1.0988	-0.0108	0.0436	0.1024	21.2356	1.3226	-0.0128	0.0621	99.3255	138.88	62.7967	0.628672
355	K5_L2C1	0.041	21.7236	53.0441	0.5624	0.7551	0.0217	-0.0187	0.0802	21.6082	1.2292	-0.0019	-0.0248	99.0655	140.89	63.1714	0.628867
355	K5_L2C1	0.0164	21.7213	53.0585	0.5054	0.8433	-0.0542	0.0125	0.1051	21.518	1.0743	-0.007	-0.0807	98.8548	142.9	63.1454	0.631376
355	K5_L2C1	-0.0035	21.6528	53.2015	0.5148	0.8657	-0.0217	0.0125	0.2185	21.5268	1.2027	0.0217	-0.0155	99.2168	144.92	63.0333	0.629213
355	K5_L2C1	0.0164	21.6958	53.2019	0.4078	0.7918	0.0163	0.0083	0.0194	21.4735	1.1102	-0.0038	-0.0217	98.7414	146.93	63.2321	0.631186
355	K5_L2C1	0.0457	21.6848	53.2591	0.5341	0.9058	-0.0054	-0.0042	0.0912	21.4547	1.238	0.0204	0.0403	99.2741	148.94	63.089	0.62993
355	K5_L2C1	0.0129	21.5845	53.2584	0.5862	0.8205	0.0542	0.0291	0.0553	21.6893	1.1006	-0.0306	0.09	99.2809	150.95	62.852	0.627869
355	K5_L2C1	0.0129	21.5732	52.521	0.5819	0.8419	-0.0162	-0.0062	0.0636	21.6074	1.1719	-0.0025	0.0186	98.3924	152.97	62.8958	0.627846
355	K5_L2C1	0.0199	21.5493	52.748	0.7079	0.8509	-0.0163	0.0166	0.0663	21.5127	1.1781	0.0032	-0.0186	98.6529	154.98	62.9556	0.628495
355	K5_L2C1	0.0223	21.6061	52.8209	0.6596	0.9173	0.0108	-0.0145	0.1106	21.6065	1.0799	0.0006	-0.0683	98.8346	156.99	62.8331	0.629168
355	K5_L2C1	-0.0106	21.5451	52.6811	0.6967	0.8782	0.0217	0.0062	0.0719	21.6293	1.1182	-0.0319	-0.0186	98.6484	159	62.7951	0.627875
355	K5_L2C1	0.0211	21.8248	52.5107	0.634	0.8622	0.0487	0.0353	0.1106	21.3795	1.1991	0.0325	0.0372	98.6957	161.02	63.3737	0.632606
355	K5_L2C1	0.0329	21.5576	52.7749	0.6334	0.8779	0	-0.0187	0.0967	21.661	1.1776	0.0032	0.0496	98.8648	163.03	62.7765	0.627069
355	K5_L2C1	0.0551	21.4949	53.0001	0.6621	0.9078	0.0433	0.0187	0.1354	21.7109	1.1509	-0.0198	0.0124	99.1917	165.04	62.618	0.626154
355	K5_L2C1	0.0153	21.3268	52.468	0.8522	0.91	0	0.0083	0.0967	21.8047	1.061	-0.0172	0.0372	98.5803	167.05	62.3351	0.624286
355	K5_L2C1	0.0082	21.3106	52.3929	1.0001	0.9031	0.092	0.0311	0.1796	21.8227	1.1421	-0.0134	-0.0341	98.8826	169.07	62.3079	0.623083
355	K5_L2C1	0.0188	21.3387	52.5605	0.9002	0.8307	0.0216	0.0083	0.1408	21.6877	1.0965	0.0223	0.0372	98.6634	171.08	62.5724	0.625249
355	K5_L2C1	0.0271	21.3998	52.6638	0.9156	0.9476	-0.0162	-0.0166	0.0718	21.8919	1.2574	-0.0236	-0.0806	99.175	173.09	62.2774	0.62217
355	K5_L2C1	-0.0047	21.4306	52.4594	0.9885	0.8338	0.0541	-0.0021	0.1325	21.8549	1.1559	0.0102	0.0341	98.9541	175.11	62.4975	0.623929
355	K5_L2C6	5.306	0.0287	68.8203	18.4205	4.6311	0.0447	0.5182	0.1892	1.0343	0.0557	0.0283	0.0221	99.0991	0	0.728902	0.044803
355	K5_L2C6	5.8285	0.801	60.9312	21.3642	6.9335	0.3748	0.9537	0.1686	1.8031	0.1112	-0.0152	-0.0472	99.2698	2.02	11.7867	0.427039
355	K5_L2C6	0.4864	20.3306	54.5908	2.9531	1.6448	-0.0434	0.4394	0.3569	18.7906	0.7977	-0.0181	-0.0777	100.39	4.05	63.4258	0.649017
355	K5_L2C6	0.0225	20.95	52.7658	0.5796	0.7259	-0.0216	0.0021	0.0331	22.5093	1.2618	0.0044	0.0186	98.8729	6.07	61.4382	0.610886
355	K5_L2C6	0.0166	20.8396	52.2677	0.6529	0.6627	0.054	-0.0083	0.1157	22.6042	1.2165	0.0178	-0.0217	98.4475	8.09	61.2989	0.609139
355	K5_L2C6	0.0071	20.6246	51.6878	0.7973	0.7386	-0.0162	-0.0186	0.1239	22.6318	1.2306	0.012	-0.0062	97.8537	10.12	60.9263	0.606248
355	K5_L2C6	0.0284	20.8905	52.2869	0.531	0.7206	0.027	0.0352	0.0606	22.3731	1.3324	0.0184	0.0217	98.3259	12.14	61.5158	0.610857
355	K5_L2C6	0.0035	21.1868	52.7791	0.5001	0.7079	-0.0216	0.0104	0.0882	22.2604	1.3686	0.0305	0.0744	99.0098	14.16	61.9796	0.61496
355	K5_L2C6	0.007	21.2657	53.157	0.535	0.7829	-0.0433	0.0042	0.1077	21.864	1.1617	-0.0267	0.0124	98.8976	16.19	62.3738	0.621962
355	K5_L2C6	0.0188	21.4578	52.9589	0.5776	0.7487	-0.0054	-0.0311	0.1131	21.9147	1.2148	-0.014	-0.0031	99.0044	18.21	62.5776	0.623012
355	K5_L2C6	0.0082	21.4928	52.8453	0.5081	0.7762	-0.0216	-0.0166	0.1048	21.8235	1.2895	0.0223	-0.0093	98.8706	20.23	62.6731	0.623553
355	K5_L2C6	-0.0035	21.4243	53.236	0.5578	0.7323	0	-0.0125	0.0773	21.62	1.323	0.0051	-0.0155	98.9758	22.26	62.866	0.62453
355	K5_L2C6	0.0106	21.4258	52.636	0.5359	0.6842	-0.0054	0.0083	0.1103	21.8479	1.2117	0.0057	0.0806	98.5571	24.28	62.6961	0.623373
355	K5_L2C6	0.0129	21.5776	53.0366	0.4464	0.7361	-0.0216	0.0124	0.127	21.7825	1.281	0.0204	0.0031	99.0359	26.3	62.8599	0.62498
355	K5_L2C6	0.0035	21.4959	52.804	0.5245	0.7295	-0.0054	-0.0249	0.0441	21.7849	1.3131	0.014	-0.0682	98.7135	28.33	62.7775	0.623736
355	K5_L2C6	0	21.4991	52.9351	0.4285	0.7959	-0.0054	0.0249	0.0525	21.6276	1.2573	0.0331	0.0279	98.682	30.35	62.8554	0.625949
355	K5_L2C6	0.0071	21.5356	52.4523	0.4779	0.7327	-0.0162	0.0166	0.1435	21.8315	1.2447	0.0184	-0.0837	98.4603	32.37	62.7686	0.624399
355	K5_L2C6	-0.0012	21.6467	52.6322	0.5151	0.7303	-0.0054	-0.0083	0.138	21.8852	1.1943	0.0089	0.0031	98.7538	34.4	62.8369	0.625578
355	K5_L2C6	0.0176	21.52	53.0089	0.4253	0.6896	0	-0.0208	0.1132	21.7003	1.2544	0.0019	0.0093	98.7405	36.42	62.9436	0.625464
355	K5_L2C6	0.0317	21.5259	53.326	0.5598	0.7146	-0.0379	-0.0083	0.0856	21.8204	1.2843	0.0153	0.031	99.3946	38.44	62.7932	0.623999
355	K5_L2C6	0.0376	21.4441	52.9606	0.5371	0.7089	0.0325	-0.0291	0.0773	21.5556	1.4213	-0.007	0.0465	98.8214	40.47	62.9854	0.624388
355	K5_L2C6	0.0352	21.4699	52.7619	0.544	0.7168	0.0271	0.0083	0.1077	21.7158	1.2422	0.0185	0.0589	98.7063	42.49	62.8372	0.624886
355	K5_L2C6	0.0153	21.4961	52.9333	0.6492	0.7579	-0.0703	-0.0042	0.069	21.8275	1.2092	0.0013	-0.0992	98.9588	44.51	62.6966	0.624375
355	K5_L2C6	-0.0177	21.3532	52.8585	0.753	0.7229	0.027	0.0083	0.1241	22.0308	1.3846	-0.0146	0.0062	99.2687	46.54	62.3781	0.618951
355	K5_L2C6	0.0212	21.4245	52.3272	0.6567	0.706	-0.0216	-0.0353	0.1572	21.875	1.4147	-0.0363	-0.0217	98.5825	48.56	62.6381	0.621
355	K5_L2C6	0.0293	21.273	52.4521	1.0903	0.7249	0.0163	-0.0145	0.0608	21.518	1.1899	0.0223	0.0093	98.3862	50.58	62.8162	0.625299
355	K5_L2C6	0.0047	21.4199	53.3046	0.5821	0.7561	-0.0542	0.0187	0.0442	21.6222	1.1983	0.0057	-0.0527	98.9565	52.61	62.8274	0.625752
355	K5_L2C6	0.0458	21.5374	52.9946	0.5604	0.7242	0.0379	0.0208	0.1132	21.916	1.2364	-0.0064	0.0651	99.2518	54.63	62.6951	0.623647
355	K5_L2C6	0.0212	21.4527	52.8142	0.4971	0.6799	-0.0325	-0.0125	0.1574	21.957	1.1442	0.0229	0.0093	98.756	56.65	62.619	0.623253
355	K5_L2C6	0.0047	21.4441	52.7839	0.5427	0.7485	-0.0596	-0.0312	0.0663	21.738	1.1931	0.0076	-0.0093	98.5292	58.68	62.7444	0.624885
355	K5_L2C6	0.027	21.3978	52.5554	0.6384	0.7184	0.0108	0.0042	0.1242	21.7772	1.3585	0.0305	-0.0186	98.6424	60.7	62.6932	0.622273
355	K5_L2C6	0.0106	21.406	52.7459	0.5244	0.7112	-0.0217	0	0.1877	21.7331	1.2366	0.0006	-0.0031	98.5561	62.72	62.7571	0.624069
355	K5_L2C6	0.0117	21.4035	53.069	0.5194	0.6794	0.0271	-0.0166	0.0469	21.7648	1.2578	0.0051	0.0031	98.7879	64.75	62.7637	0.623499
355	K5_L2C6	0.013	21.466	52.8738	0.5755	0.7594	0.0217	0.0166	0.0552	22.0461	1.2045	0.0395	0.0279	99.0992	66.77	62.4383	0.621877
355	K5_L2C6	0.0188	21.4263	52.9335	0.6509	0.697	-0.0108	0.0104	0.0469	21.7944	1.201	-0.0051	-0.0279	98.7792	68.79	62.7348	0.624033
355	K5_L2C6	0.0035	21.3504	52.6325	0.5685	0.7146	0.0054	0.0062	0.1325	21.8383	1.2217	0.0083	-0.0248	98.4819	70.82	62.5834	0.622539
355	K5_L2C6	0.0481	21.5459	52.7885	0.6284	0.7064	0.0325	0.0021	0.1077	21.8154	1.1619	0.0146	-0.0155	98.8516	72.84	62.8309	0.625528
355	K5_L2C6	-0.0212	21.5837	52.2932	0.6168	0.7218	0.0271	0.0062	0.0773	22.0437	1.1769	0.0286	-0.0341	98.5754	74.86	62.618	0.623469
355	K5_L2C6	0.0024	21.4354	52.757	0.6612	0.708	-0.0487	-0.0083	0.1049	21.9781	1.2929	0.0013	-0.0651	98.9411	76.89	62.5416	0.621324
355	K5_L2C6	0.02	21.3321	53.2072	0.6084	0.6877	0.0163	0.027	0.0829	21.7805	1.112	0.0229	-0.0372	98.8969	78.91	62.6584	0.624063
355	K5_L2C6	0.0059	21.4042	52.4884	0.5964	0.7317	0.0054	0.0208	0.0635	21.8127	1.1234	0.014	0.0558	98.3221	80.93	62.6461	0.624407
355	K5_L2C6	-0.0012	21.4309	52.3666	0.6111	0.6772	0.0054	-0.0021	0.1104	21.7942	1.2807	-0.0083	-0.0651	98.2764	82.96	62.7662	0.623264
355	K5_L2C6	0.0188	21.4369	52.8842	0.6218	0.6795	0	0.027	0.1133	21.6819	1.1628	-0.0287	-0.0155	98.6262	84.98	62.8857	0.625695
355	K5_L2C6	0.0176	21.4711	52.7257	0.6726	0.6558	0.0217	0.0561	0.0994	22.0015	1.1173	0.0146	-0.0248	98.8535	87	62.6251	0.623279
355	K5_L2C6	0	21.3709	52.7251	0.5958	0.6679	-0.0054	0.027	0.0773	21.6934	1.2129	-0.0325	-0.0279	98.3703	89.03	62.8172	0.624335
355	K5_L2C6	0.0282	21.391	52.4377	0.7094	0.6716	0.0054	0.0187	0.0304	21.7011	1.1257	0.0216	-0.0527	98.1408	91.05	62.8263	0.625381
355	K5_L2C6	0.0082	21.5085	52.7716	0.6227	0.6543	0.0379	0	0.0801	21.9642	1.2696	-0.0159	0.0621	98.9793	93.07	62.706	0.622504
355	K5_L2C6	0.0117	21.4375	53.0519	0.6765	0.6861	-0.0162	-0.0374	0.1159	21.9674	1.1675	-0.0032	0.0031	99.1177	95.1	62.5836	0.622741
355	K5_L2C6	0.067	21.3827	53.1666	0.6006	0.7054	0.065	0.0208	0.1105	21.7695	1.3538	0.0006	0.0124	99.2549	97.12	62.7018	0.622234
355	K5_L2C6	-0.0047	21.3079	52.9414	0.6016	0.7744	0.0054	0.0125	0.0442	21.5452	1.2636	0.0197	0.0093	98.5252	99.14	62.7604	0.624635
355	K5_L2C6	-0.0047	21.2264	53.5166	0.6986	0.7228	-0.0108	0.027	0.0608	21.6208	1.259	0.0325	0.0404	99.2048	101.17	62.6609	0.623008
355	K5_L2C6	0.0293	21.3095	53.3952	0.6616	0.7581	0	-0.0291	0.1189	21.7336	1.1872	-0.0159	-0.0031	99.1934	103.19	62.5889	0.623515
355	K5_L2C6	0.0282	21.4693	52.4209	0.704	0.7843	0.0433	0.0166	0.0801	21.8111	1.3297	-0.0096	0.0062	98.6937	105.21	62.6496	0.623009
355	K5_L2C6	0.0224	21.5228	52.6859	0.6682	0.7524	0.0108	0.0042	0.1435	21.9934	1.2364	0.0076	-0.0899	99.0476	107.24	62.5632	0.622704
355	K5_L2C6	0.0141	21.3491	52.7639	0.7569	0.6668	0.0271	-0.0166	0.0857	21.8215	1.1897	-0.0025	-0.031	98.6747	109.26	62.6623	0.623026
355	K5_L2C6	0.0247	21.3898	52.8592	0.6433	0.7085	0.0271	-0.0353	0.0525	21.9619	1.1653	-0.0038	-0.0589	98.8322	111.28	62.5076	0.622296
355	K5_L2C6	0.033	21.4938	52.226	0.6803	0.7627	0.0217	-0.0166	0.0166	21.9034	1.1627	-0.0083	0.0434	98.3436	113.31	62.6101	0.624057
355	K5_L2C6	0.0342	21.476	52.3626	0.6976	0.6899	-0.027	0.0166	0.1158	22.166	1.2297	0.0076	0.031	98.8271	115.33	62.4178	0.620521
355	K5_L2C6	0.0236	21.4078	52.4227	0.7045	0.6633	-0.0162	0.0187	0.1077	21.9761	1.222	-0.0057	-0.1024	98.5462	117.35	62.5722	0.621768
355	K5_L2C6	0.0224	21.4123	52.8786	0.5901	0.6606	-0.0271	-0.0021	0.1215	22.1002	1.2277	-0.0375	0.0682	99.0815	119.38	62.4536	0.620504
355	K5_L2C6	0.0024	21.3962	52.6772	0.7667	0.6939	0.0163	0.0021	0.0635	21.8791	1.1774	-0.0038	-0.0155	98.6747	121.4	62.6188	0.623084
355	K5_L2C6	0.0259	21.3924	53.1029	0.7337	0.6833	-0.0162	0.0249	0.0745	22.0358	1.2516	-0.0083	0.0093	99.3344	123.42	62.4679	0.620691
355	K5_L2C6	0.013	21.3836	52.6326	0.7902	0.6714	0.0217	0.0042	0.0884	22.0362	1.2251	-0.0038	0.0776	98.9437	125.45	62.4734	0.620861
355	K5_L2C6	-0.0212	21.3072	52.3656	0.8438	0.6502	0.0217	0.0062	0.1159	22.0396	1.2694	-0.0025	-0.0434	98.6196	127.47	62.4138	0.61953
355	K5_L2C6	0.0247	21.3344	52.7812	0.8812	0.6572	-0.0054	0.0166	0.1049	22.06	1.102	-0.0038	0.0217	98.9838	129.49	62.4137	0.621341
355	K5_L2C6	0.0012	21.4624	52.4459	0.7757	0.6679	0.0325	0.0083	0.1215	22.0011	1.3025	-0.0172	0.0093	98.8282	131.52	62.6001	0.62129
355	K5_L2C6	0.0742	21.5469	52.316	0.7714	0.6365	-0.0217	0.0062	0.0856	22.0468	1.2128	-0.0057	0.0372	98.7335	133.54	62.6865	0.622669
355	K5_L2C6	0.0071	21.5181	52.2956	0.758	0.6806	-0.0379	-0.0042	0.1766	22.0138	1.2216	0.0178	-0.0341	98.6892	135.56	62.6312	0.622598
355	K5_L2C6	0.0188	21.5372	52.2379	0.6736	0.6812	-0.0271	0	0.1987	22.0727	1.2243	0.0184	-0.0186	98.6628	137.59	62.591	0.622185
355	K5_L2C6	0.0341	21.5372	53.3875	0.7482	0.6472	-0.0271	-0.0104	0.0829	21.8556	1.2431	-0.0357	0.062	99.5978	139.61	62.8581	0.624188
355	K5_L2C6	0.0247	21.469	52.925	0.7342	0.6191	-0.0325	0.0104	0.0829	21.8402	1.1807	0.0293	-0.0186	98.9155	141.63	62.837	0.624243
355	K5_L2C6	0.047	21.5387	52.6075	0.7477	0.6505	0.0217	0.0062	0.0829	21.7864	1.2075	-0.0414	0.0031	98.6992	143.66	62.9267	0.625275
355	K5_L2C6	0.0317	21.5266	52.7339	0.788	0.6398	-0.0108	0.0166	0.0911	21.879	1.2131	-0.0032	-0.0062	98.9197	145.68	62.8323	0.624144
355	K5_L2C6	0.0141	21.6211	52.5281	0.7283	0.6017	0.0325	0.0415	0.1132	21.8816	1.2693	-0.0115	0	98.8315	147.7	62.982	0.624568
355	K5_L2C6	0.0153	21.56	52.688	0.6846	0.6474	0.0108	0.0249	0.0884	21.7278	1.2794	-0.0319	0.0466	98.7732	149.73	63.0143	0.625361
355	K5_L2C6	0.034	21.549	52.9011	0.6691	0.6166	0.0325	-0.0104	0.105	21.6691	1.2492	0.0146	0.0062	98.8464	151.75	63.104	0.626152
355	K5_L2C6	0.02	21.5713	52.4789	0.6829	0.5759	-0.0162	0.0208	0.1242	21.7603	1.2216	0.0076	-0.0682	98.4635	153.77	63.0876	0.625749
355	K5_L2C6	0.0305	21.5661	53.5128	0.6635	0.6345	0.0271	0.0083	0.0774	21.7494	1.1479	0.0293	-0.0248	99.4468	155.8	63.0157	0.626565
355	K5_L2C6	0.0352	21.5783	52.307	0.6928	0.6267	0.0325	-0.0021	0.0856	21.789	1.2039	0.0115	0.0062	98.3686	157.82	62.9983	0.625716
355	K5_L2C6	0.0211	21.5504	52.4475	0.8045	0.66	0.0325	-0.0332	0.1187	21.7254	1.2309	-0.0121	-0.0589	98.5911	159.84	62.9897	0.625782
355	K5_L2C6	0.0246	21.5292	52.8633	0.82	0.6093	0.0163	0.0145	0.0801	21.7139	1.2521	0.0019	0.0155	98.9408	161.87	63.0459	0.62545
355	K5_L2C6	-0.0023	21.4523	52.4675	0.864	0.5994	0.0325	-0.0208	0.0663	21.7172	1.207	-0.0204	0.0062	98.4125	163.89	62.9722	0.625044
355	K5_L2C6	0.0188	21.474	52.9374	0.8602	0.6067	-0.0054	0.027	0.0552	21.8269	1.1414	0.0204	-0.0403	98.9679	165.91	62.8726	0.624839
355	K5_L2C6	0.0165	21.4652	52.3501	0.9084	0.6572	0.0217	-0.0145	0.1877	21.8114	1.2006	0.0706	-0.0961	98.6893	167.94	62.8122	0.62429
355	K5_L2C6	0.0141	21.4617	52.596	0.9724	0.6238	-0.0433	-0.0436	0.0994	21.8022	1.1028	0.0038	0.0217	98.698	169.96	62.8621	0.625356
355	K5_L2C6	0.0328	21.4013	52.8098	0.8777	0.6681	0.0217	0.0062	0.0608	21.595	1.2162	-0.0006	-0.0217	98.6896	171.98	62.9522	0.625642
355	K5_L2C6	0.0481	21.526	52.8286	0.8201	0.6509	-0.0379	-0.0042	0.0607	21.8383	1.1946	-0.0165	0.0806	99.048	174.01	62.8589	0.624741
355	K5_L2C6	0.0118	21.5451	52.434	0.8421	0.6292	0.0054	-0.0353	-0.011	21.831	1.2333	-0.0045	-0.1116	98.532	176.03	62.9158	0.624625
355	K5_L2C6	0.0023	21.5315	52.3538	0.8043	0.6453	0.0271	-0.0125	0.0801	21.607	1.2337	-0.0318	-0.0527	98.2851	178.05	63.1114	0.626757
355	K5_L2C6	0.0364	21.4821	51.9199	0.7742	0.6774	0.0054	0.0228	0.0939	21.6826	1.2633	0.0038	-0.0186	97.9619	180.07	62.9369	0.62514
355	K5_L2C6	0.0317	21.5587	52.6991	0.726	0.5801	-0.065	0.0042	0.0884	21.5547	1.219	0.0096	0.0838	98.5552	182.1	63.282	0.62774
355	K5_L2C6	0.0211	21.5689	52.6554	0.8135	0.6779	0.0163	0.0104	0.0359	21.5346	1.1895	0.0191	-0.0093	98.5425	184.12	63.1836	0.628364
355	K5_L2C6	0.0235	21.5788	52.7328	0.8577	0.5889	0.0054	0.0083	0.1132	21.7988	1.2458	0.0267	0.0093	98.9892	186.15	63.0387	0.62519
355	K5_L2C6	0.0129	21.5334	52.7838	0.7955	0.6679	-0.0217	-0.0145	0.116	21.6947	1.1621	0.0013	0.0682	98.8358	188.17	62.9926	0.626622
355	K5_L2C6	0.0082	21.6174	52.2773	0.8468	0.6204	-0.0054	-0.0145	0.1132	21.4927	1.3056	-0.0204	0.031	98.3127	190.19	63.3559	0.628112
355	K5_L2C6	0.0258	21.5318	52.3596	0.902	0.5664	-0.0163	-0.0187	0.0663	21.7596	1.1145	0.0165	-0.0372	98.3425	192.21	63.0583	0.626434
355	K5_L2C6	0.0059	21.5824	52.4059	0.8925	0.6469	0	0.0187	0.0939	21.7582	1.3261	-0.0267	0.0496	98.7801	194.24	63.0078	0.624815
355	K5_L2C6	0.0153	21.5191	52.6305	0.9275	0.6389	0.0162	-0.0208	0.116	21.8811	1.1591	-0.0293	-0.0496	98.9037	196.26	62.8232	0.624596
355	K5_L2C6	0.0176	21.5485	52.5497	0.9368	0.6495	-0.0108	0.0374	0.0994	21.5845	1.2609	0.007	0.0093	98.7007	198.29	63.1475	0.62689
355	K5_L2C6	-0.0035	21.6183	52.4778	0.9331	0.66	0.0217	0.0021	0.116	21.7836	1.246	-0.0064	0.0403	98.8988	200.31	63.003	0.625771
355	K5_L2C6	0.027	21.6383	52.4824	0.8242	0.6662	-0.0487	0.0062	0.1298	21.7645	1.2992	0	-0.062	98.8379	202.33	63.0361	0.625634
355	K5_L2C6	0.0059	21.6091	52.1267	0.9236	0.7055	-0.0162	-0.0062	0.1187	21.8899	1.2005	0.0083	-0.0217	98.5881	204.35	62.824	0.625059
355	K5_L2C6	0.0258	21.6805	52.252	0.7396	0.6953	0.0054	-0.0104	0.0801	21.5619	1.1501	0.0242	0.0403	98.2551	206.38	63.2521	0.629697
355	K5_L2C6	0.0446	21.6339	52.3898	0.7706	0.6469	-0.0812	-0.0021	0.1104	21.7043	1.2846	0.0172	0.0031	98.6054	208.4	63.1189	0.626348
355	K5_L2C6	0.007	21.6227	52.5788	0.7961	0.6987	0.0054	0.0062	0.0829	21.6222	1.1713	0.0019	-0.0651	98.5933	210.43	63.1232	0.628236
355	K5_L2C6	0.0012	21.5078	52.5676	0.7179	0.6666	0.0217	0.0249	0.152	21.5092	1.1299	-0.007	0.0838	98.3824	212.45	63.159	0.628584
355	K5_L2C6	0.0317	21.7085	52.3872	0.7852	0.6847	-0.0487	-0.0042	0.1436	21.7966	1.1024	-0.0344	0.0186	98.6584	214.47	63.0541	0.628092
355	K5_L2C6	0.0164	21.6273	52.4324	0.7007	0.6461	0.0054	-0.0187	0.1325	21.7452	1.2219	0.0089	0.0217	98.5585	216.49	63.0707	0.626507
355	K5_L2C6	0.0235	21.6843	52.5753	0.759	0.6302	-0.0758	-0.0125	0.0608	21.6822	1.1835	-0.0172	0.0062	98.6049	218.52	63.218	0.628161
355	K5_L2C6	0.0305	21.6042	52.9203	0.8295	0.6482	-0.0163	-0.027	0.094	21.628	1.145	-0.0045	-0.0062	98.8996	220.54	63.1642	0.62825
355	K5_L2C6	0.0082	21.5313	52.5221	0.8737	0.6521	0.0379	0.0021	0.0912	21.5581	1.1388	0.0217	0.0372	98.4744	222.57	63.1529	0.628242
355	K5_L2C6	0.0012	21.5865	53.0616	0.8147	0.719	0.0217	0.0332	0.1685	21.641	1.2343	0.0121	0.0527	99.3464	224.59	63.0378	0.627
355	K5_L2C6	0.0199	21.5686	52.7653	0.8071	0.6454	0.0271	0.0083	0.0939	21.7699	1.21	0.0153	-0.0124	98.9307	226.61	62.9828	0.625742
355	K5_L2C6	0.0129	21.5954	52.8318	0.7636	0.6473	-0.0054	0.0021	0.1464	21.6613	1.2076	0.0115	-0.0465	98.8799	228.63	63.1214	0.627165
355	K5_L2C6	0.0188	21.5442	52.6127	0.7945	0.6327	0.0271	-0.0104	0.0939	21.6849	1.1953	0.0236	0.0496	98.6773	230.66	63.0611	0.626496
355	K5_L2C6	0.0446	21.6022	52.6262	0.8013	0.6092	0.0163	-0.0083	0.1409	21.7757	1.2253	0	0.0031	98.8447	232.68	63.0609	0.62589
355	K5_L2C6	0.0012	21.5639	52.603	0.7785	0.6585	-0.0325	0.0062	0.105	21.8508	1.1447	-0.0089	-0.0186	98.7116	234.7	62.8771	0.62554
355	K5_L2C6	0.0153	21.598	52.646	0.7703	0.6383	-0.0163	0.0208	0	21.8706	1.1444	0.0204	0	98.7238	236.73	62.9202	0.625712
355	K5_L2C6	-0.0035	21.7431	52.5758	0.7187	0.6745	-0.0162	0.0249	0.0884	21.746	1.0906	0.0038	0.1179	98.7836	238.75	63.1567	0.629102
355	K5_L2C6	0.0363	21.8124	52.219	0.82	0.6755	0.0163	-0.0021	0.0746	21.5572	1.1748	-0.0025	-0.0155	98.3861	240.77	63.4241	0.630903
355	K5_L2C6	-0.0012	21.8036	52.3385	0.7873	0.6448	-0.0054	-0.0104	0.1575	21.5846	1.2017	0.0395	0.0031	98.5607	242.8	63.4271	0.63025
355	K5_L2C6	0.0411	21.9697	52.2695	0.6974	0.6052	-0.0054	-0.0062	0.0497	21.8594	1.2848	0.0108	0.0124	98.8001	244.82	63.3723	0.628376
355	K5_L2C6	0.0328	22.0029	52.3895	0.653	0.6633	0.0163	-0.0083	0.0856	21.6725	1.1984	0.0038	0.0589	98.7771	246.84	63.5229	0.631507
355	K5_L2C6	0.0047	21.9611	52.9534	0.6679	0.6932	0.0433	-0.0042	0.1299	21.5462	1.2702	0.0204	0.0279	99.3182	248.87	63.5695	0.63161
355	K5_L2C6	0.0246	21.8018	52.9661	0.6644	0.666	0	-0.0229	0.1271	21.4032	1.2377	-0.0115	-0.0341	98.891	250.89	63.5852	0.631715
355	K5_L2C6	0.0223	21.8392	52.532	0.6652	0.7054	0.0054	0.0312	0.0857	21.5173	1.2405	0.0102	0.0403	98.6946	252.91	63.4542	0.630916
355	K5_L2C6	-0.0059	21.8775	53.1008	0.6742	0.6339	0.0596	0.0291	0.0774	21.5279	1.0826	-0.0013	-0.09	99.063	254.94	63.5787	0.632854
355	K5_L2C6	0.0023	21.8887	52.58	0.7219	0.677	-0.0054	0.0249	0.152	21.5722	1.1837	0.0529	0.0093	98.865	256.96	63.4876	0.63147
355	K5_L2C6	-0.0012	21.9622	52.4562	0.7064	0.6384	-0.0379	-0.0062	0.0912	21.669	1.1806	0.0089	-0.0434	98.7127	258.98	63.5164	0.631295
355	K5_L2C6	0.0304	21.8184	53.2546	0.6933	0.6166	-0.0108	0.0104	0.0856	21.6161	1.2163	-0.0083	-0.0217	99.3418	261.01	63.4476	0.629935
355	K5_L2C13	3.4528	0.0745	69.9154	12.7817	1.7192	0.0727	3.2946	0.3174	1.5354	0.0836	0.0131	-0.0253	93.2604	0	3.43084	0.0757616
355	K5_L2C13	2.8566	0.066	65.9822	15.743	3.3466	0.0669	2.2096	0.2826	1.2606	0.0433	-0.0173	0.0505	91.908	2.01	2.07647	0.0827286
355	K5_L2C13	2.5734	0.1111	73.4	10.3012	0.6748	0.0392	4.0404	0.5182	1.7038	0.0898	0.0028	0	93.4545	4.02	7.15889	0.0993791
355	K5_L2C13	1.724	4.5134	61.3952	8.8161	1.3004	0.1883	2.7616	0.4026	5.8163	0.2852	-0.0061	-0.1006	87.2031	6.03	51.813	0.568557
355	K5_L2C13	-0.0294	21.5524	50.5802	0.638	0.7738	-0.0378	0.027	0.1766	21.5596	1.233	0.0064	-0.1147	96.5468	8.04	63.0126	0.627477
355	K5_L2C13	0.0094	21.5649	49.8472	0.588	0.8104	-0.0324	0.0228	0.1296	21.5734	1.2057	-0.0432	0.0155	95.7669	10.05	62.9634	0.627754
355	K5_L2C13	0.0141	21.5248	50.4733	0.7113	0.7871	-0.0162	0.0104	0.1213	21.8348	1.2115	0.0095	-0.0341	96.6981	12.06	62.682	0.62459
355	K5_L2C13	0.0024	21.4972	50.8633	0.6961	0.7639	-0.0324	-0.0166	0.1462	21.7476	1.1729	-0.0299	0.1085	96.998	14.08	62.772	0.625576
355	K5_L2C13	0.0035	21.4217	50.6043	0.6813	0.806	-0.0433	0.0228	0.0828	21.5985	1.1465	0.0153	0.0496	96.4323	16.09	62.7878	0.626554
355	K5_L2C13	0.0047	21.5443	50.8864	0.5885	0.8353	0.0325	0.0062	0.1104	21.7473	0.9918	-0.0267	-0.0341	96.7474	18.12	62.7295	0.627969
355	K5_L2C13	0.0247	21.4637	50.3734	0.6409	0.7713	-0.0054	0	0.1324	21.525	1.1793	-0.0057	-0.0093	96.1107	20.13	62.9555	0.627426
355	K5_L2C13	-0.0047	21.4375	50.1923	0.7783	0.8419	-0.0054	0.0166	0.0138	21.8655	1.1399	0.0171	-0.0062	96.303	22.14	62.4836	0.624062
355	K5_L2C13	0.0024	21.5903	50.4318	0.6543	0.8895	-0.0108	0.0187	0.1131	21.8047	1.1551	-0.0038	0.0186	96.6785	24.15	62.6498	0.626189
355	K5_L2C13	0.0306	21.4663	51.1759	0.6089	0.8843	0.0487	0.0249	0.0773	21.6604	1.1615	-0.0235	0.0031	97.1417	26.16	62.6695	0.626249
355	K5_L2C13	-0.0012	21.5425	51.333	0.7017	0.8172	0.027	-0.0207	0.1048	21.815	1.1911	-0.0121	0.0062	97.5386	28.17	62.682	0.625194
355	K5_L2C13	0.0118	21.51	51.1903	0.6694	0.7411	-0.0271	0.0208	0.0331	21.6644	1.108	-0.0089	0.0217	96.9704	30.18	62.9017	0.62724
355	K5_L2C13	0.033	21.5332	50.6344	0.701	0.7813	0.0324	0.0311	0.1985	21.7888	1.1995	0.007	-0.0124	96.9401	32.19	62.7459	0.625273
355	K5_L2C13	0.0212	21.439	50.7145	0.6456	0.7844	0.0864	0.0145	0.1516	21.9008	1.232	0.0413	-0.0682	97.0314	34.24	62.5245	0.622771
355	K5_L2C13	-0.0082	21.5452	50.6126	0.6733	0.7161	-0.0378	0.0021	0.0855	21.7266	1.1993	-0.0083	-0.0248	96.5607	36.25	62.9087	0.62604
355	K5_L2C13	0.0188	21.431	51.2713	0.679	0.7082	0.0162	-0.0145	0.0993	21.8834	1.1906	0.0407	0.0248	97.3632	38.26	62.6336	0.623286
355	K5_L2C13	0.0436	21.4096	50.8755	0.8262	0.6725	0.0108	0.0041	0.124	21.9926	1.2499	-0.007	-0.0031	97.2089	40.26	62.5451	0.621334
355	K5_L2C13	0.0118	21.3918	50.4923	0.7744	0.6715	-0.027	0.0021	0.1515	21.8578	1.2853	-0.0203	0.0279	96.6664	42.27	62.6655	0.622141
355	K5_L2C13	0	21.49	51.3396	0.627	0.6268	-0.0108	-0.0332	0.1075	21.9477	1.2381	0.0165	0.0062	97.3994	44.28	62.739	0.622791
355	K5_L2C13	0.0082	21.559	51.6895	0.6494	0.6552	0.0054	0.027	0.1545	21.825	1.2536	0.0178	-0.0093	97.8447	46.29	62.9027	0.624628
355	K5_L2C13	0.0106	21.54	52.0199	0.5694	0.6384	0.0216	-0.0104	0.0883	21.8429	1.1762	0.0114	0.0403	97.9591	48.3	62.8858	0.625036
355	K5_L2C13	-0.0129	21.6246	51.9164	0.4852	0.6422	0.0216	0	0.0965	21.8162	1.3069	-0.0222	0.062	97.9717	50.36	62.9997	0.624882
355	K5_L2C13	0.0024	21.5665	51.48	0.6497	0.6642	0.0162	0.029	0.1242	21.7326	1.1435	0.0083	0.0496	97.4662	52.37	62.9941	0.626787
355	K5_L2C13	0.0082	21.5582	51.4518	0.6448	0.655	0.027	-0.0083	0.1351	21.9042	1.128	-0.0019	0.062	97.5744	54.37	62.8206	0.625107
355	K5_L2C13	0.0271	21.516	51.197	0.7963	0.692	0.0649	0.0041	0.1434	21.7157	1.3782	0.0127	-0.0589	97.5472	56.38	62.9202	0.623988
355	K5_L2C13	0.0141	21.5438	51.2611	0.7687	0.7256	-0.0054	0.0021	0.1957	21.9371	1.3215	-0.0057	-0.0062	97.7697	58.39	62.6786	0.622632
355	K5_L2C13	-0.0024	21.7617	51.6465	0.6563	0.6968	0.0324	-0.027	0.091	21.9451	1.2678	0.0394	0.0341	98.171	60.4	62.9432	0.625461
355	K5_L2C13	0.0071	21.5933	52.0577	0.6847	0.6794	0.0054	-0.0456	0.1103	21.87	1.2804	0.0178	0.0124	98.3186	62.4	62.8616	0.62427
355	K5_L2C13	-0.0141	21.5533	51.9923	0.7056	0.7142	0	0.0228	0.0883	21.7074	1.2358	-0.0025	-0.0465	98.0197	64.41	62.9398	0.625946
355	K5_L2C13	0.0247	21.6311	51.8568	0.7857	0.7486	-0.0216	-0.027	0.1186	21.939	1.179	0.0165	-0.0062	98.3	66.47	62.7411	0.625021
355	K5_L2C13	-0.0212	21.728	51.6028	0.7784	0.7656	-0.0379	-0.0166	0.0331	21.8317	1.313	-0.0013	0.0527	98.1052	68.48	62.9328	0.625781
355	K5_L2C13	-0.0082	21.5522	51.9224	0.7008	0.8278	-0.0433	-0.0207	0.1187	21.7235	1.251	-0.0261	-0.0124	98.0962	70.49	62.7724	0.625613
355	K5_L2C13	0.0318	21.4746	52.0227	0.7025	0.779	-0.0216	-0.0145	0.1075	21.9287	1.2948	0.0165	-0.0775	98.3581	72.5	62.5419	0.622234
355	K5_L2C13	0.02	21.5272	51.0862	0.702	0.7842	0.0324	-0.0062	0.1159	21.6777	1.2001	-0.0076	-0.0031	97.1456	74.5	62.8497	0.626335
355	K5_L2C13	0.0247	21.6863	51.9241	0.6577	0.7213	0.027	-0.0083	0.1462	21.9683	1.1881	0.0114	0.0434	98.3986	76.51	62.8064	0.625228
355	K5_L2C13	0.0341	21.6434	51.3028	0.6486	0.6678	-0.0324	-0.0062	0.0551	21.9617	1.2022	0.0406	0.0372	97.5936	78.52	62.837	0.624687
355	K5_L2C13	-0.0012	21.5701	51.7513	0.6104	0.7213	0	0.0456	0.0414	21.898	1.2384	-0.0165	0.0372	97.9137	80.53	62.7528	0.624165
355	K5_L2C13	0.04	21.6627	51.7221	0.7373	0.6575	0.0649	-0.0104	0.1379	21.8818	1.2384	-0.0121	-0.031	98.1425	82.59	62.9532	0.625333
355	K5_L2C13	0.0129	21.5998	51.7769	0.6381	0.6753	0.0108	0.0249	0.1296	21.8254	1.2712	0.0057	0.0744	98.0451	84.6	62.9199	0.624887
355	K5_L2C13	0.04	21.7079	52.0353	0.591	0.6365	0.0108	0.0083	0.1186	21.9008	1.3037	-0.0013	-0.0899	98.3528	86.61	63.0099	0.624961
355	K5_L2C13	0.0118	21.5272	51.8052	0.7856	0.6357	0.0216	0.0041	0.091	21.8842	1.1935	-0.0216	-0.0527	97.9599	88.61	62.833	0.624299
355	K5_L2C13	-0.0012	21.5588	51.8311	0.7143	0.5454	0.0108	0.0041	0.1571	21.9283	1.2531	-0.0191	0.0062	98.0093	90.62	62.941	0.623584
355	K5_L2C13	0.027	21.5101	52.4299	0.741	0.5819	-0.0325	-0.0062	0.1076	21.937	1.2237	-0.0013	0.0341	98.5922	92.63	62.831	0.623267
355	K5_L2C13	-0.0212	21.5592	51.9139	0.7662	0.5393	0	-0.0311	0.0827	21.9161	1.1731	-0.0019	0.0093	97.9598	94.64	62.962	0.624533
355	K5_L2C13	0.02	21.6015	51.9625	0.7094	0.5907	0.0162	0.0041	0.0551	21.9669	1.2353	-0.0152	0.0093	98.1711	96.64	62.8877	0.623841
355	K5_L2C13	0.0505	21.6424	52.0837	0.6604	0.6567	-0.0162	0	0.091	21.9059	1.1997	-0.0095	-0.0124	98.2903	98.71	62.9076	0.625266
355	K5_L2C13	0.0023	21.6455	52.2467	0.7187	0.6078	0.0271	0	0.1655	21.7985	1.2896	0	-0.0062	98.5016	100.72	63.0859	0.625466
355	K5_L2C13	0.0611	21.5677	52.2966	0.6683	0.5779	0	0	0.0855	21.804	1.3252	-0.0083	0.0279	98.4142	102.72	63.0359	0.6242
355	K5_L2C13	-0.0047	21.612	52.1336	0.6899	0.6245	-0.0379	0.0104	0.0965	22.0287	1.2472	-0.0121	-0.0713	98.4428	104.73	62.7913	0.623209
355	K5_L2C13	0.0212	21.5741	52.2547	0.8697	0.5616	0.0216	-0.0166	0.0827	22.0014	1.3365	-0.0235	0.0279	98.7515	106.74	62.8609	0.622161
355	K5_L2C13	0.0282	21.5949	52.0637	0.7728	0.5906	0.0433	0.0187	0.0992	22.0489	1.3306	0.0051	-0.0217	98.5959	108.75	62.7966	0.62197
355	K5_L2C13	0.0153	21.5456	51.7824	0.7942	0.602	0.0108	-0.0041	0.0634	22.0061	1.0803	-0.0121	0.0961	97.9961	110.75	62.7721	0.624426
355	K5_L2C13	0.0082	21.5347	51.741	0.7356	0.5584	0.0054	-0.0041	0.1489	21.845	1.2682	-0.0108	-0.0465	97.8453	112.76	62.9837	0.624011
355	K5_L2C13	0.0223	21.5788	52.9519	0.7875	0.6168	-0.0271	0.0415	0.1269	21.9459	1.2928	0.0019	-0.031	99.3665	114.82	62.8504	0.623218
355	K5_L2C13	0.0047	21.6111	52.0739	0.732	0.5852	0.0325	-0.0042	0.091	21.9343	1.1611	0.0394	-0.0465	98.2652	116.83	62.9388	0.625036
355	K5_L2C13	0.0153	21.7286	52.901	0.6824	0.6048	0.0487	-0.0042	0.1132	21.9232	1.2004	0.021	-0.031	99.2385	118.84	63.0508	0.626015
355	K5_L2C13	-0.0094	21.7399	52.3301	0.5968	0.5958	-0.0433	-0.0166	0.0911	21.8031	1.1973	-0.0019	0.0031	98.3572	120.85	63.1983	0.627386
355	K5_L2C13	0.0094	21.7999	53.1805	0.5588	0.5718	0.0325	-0.0249	0.1297	21.784	1.2841	-0.0045	0.0589	99.4096	122.85	63.3137	0.627332
355	K5_L2C13	0.0059	21.7771	52.4565	0.6213	0.5576	0.0487	0.0166	0.0607	21.9623	1.3158	-0.0235	0.0093	98.8316	124.86	63.1247	0.624963
355	K5_L2C13	0.0012	21.6701	52.4779	0.5237	0.6062	-0.0271	-0.0228	0.0745	21.8428	1.2686	-0.0655	-0.0527	98.4649	126.87	63.0688	0.625498
355	K5_L2C13	0.0316	21.7786	52.8022	0.5946	0.5944	0.0217	-0.0332	0.0966	21.6486	1.1707	-0.0013	0.0713	98.8103	128.88	63.4011	0.629649
355	K5_L2C13	0.0528	21.7185	52.1555	0.6216	0.5708	0.0162	0.0208	0.1104	21.6424	1.2867	0	-0.0713	98.1956	130.94	63.3747	0.627869
355	K5_L2C13	0.034	21.7254	52.9535	0.6529	0.5532	0.0217	0.0374	0.1104	21.7753	1.2184	-0.0006	-0.0155	99.0822	132.95	63.2678	0.627295
355	K5_L2C13	0.0457	21.7741	52.7941	0.6141	0.6354	-0.0325	-0.0145	0.1215	21.7402	1.1558	0.0102	0.0248	98.9158	134.96	63.2474	0.628821
355	K5_L2C13	0.007	21.7831	52.981	0.6386	0.5862	0.0433	0	0.0662	21.9958	1.1853	0.0108	0.0434	99.3407	136.96	63.0592	0.626022
355	K5_L2C13	0.0035	21.7514	52.8945	0.6594	0.5839	0.0325	0.0062	0.1132	21.6626	1.2722	0.0242	-0.031	99.0035	138.97	63.3715	0.628167
355	K5_L2C13	0.0247	21.8027	52.5866	0.6212	0.6037	0.0541	0.0187	0.1021	21.9168	1.2266	-0.0388	0.062	99.019	140.98	63.1381	0.626608
355	K5_L2C13	-0.0094	21.7129	52.7162	0.663	0.6224	0.0054	-0.0083	0.1049	21.8225	1.242	0.0267	0.0217	98.9376	142.99	63.1143	0.626439
355	K5_L2C13	0.0129	21.5998	52.8169	0.7631	0.6436	-0.0271	0.0062	0.0469	21.7299	1.2513	0.0121	-0.0248	98.8828	144.99	63.0601	0.626062
355	K5_L2C13	0.0411	21.7094	52.7847	0.5916	0.5933	0.0487	-0.0125	0.1076	21.8878	1.2418	0.0286	0.0496	99.0842	147.06	63.0817	0.625742
355	K5_L2C13	0.007	21.6199	52.4706	0.7263	0.5549	0.0541	0.0021	0.0359	21.6188	1.3019	-0.0235	0.0031	98.3946	149.07	63.3147	0.626889
355	K5_L2C13	0.0117	21.7375	53.0649	0.6025	0.637	-0.0487	-0.0104	0.1159	21.8956	1.135	0.0407	0.0217	99.2627	151.07	63.0463	0.627062
355	K5_L2C13	0.0188	21.7417	52.9612	0.7035	0.5928	0.0108	-0.0021	0.08	21.9279	1.1499	0.007	0.0217	99.2154	153.08	63.0758	0.626626
355	K5_L2C13	0.0059	21.7446	52.7526	0.5723	0.6167	0.0162	-0.0042	0.0166	22.046	1.2058	-0.0032	0.0341	99.0107	155.09	62.9266	0.624892
355	K5_L2C13	0.02	21.7715	52.3605	0.5499	0.5845	0.0162	0.0062	0.0552	21.7571	1.1641	0.0108	0.1178	98.4138	157.09	63.2944	0.628535
355	K5_L2C13	0.027	21.7531	52.4881	0.5693	0.5692	-0.0108	-0.0021	0.0083	21.8767	1.2001	-0.0381	0.0124	98.5042	159.1	63.1717	0.626753
355	K5_L2C13	0.0505	21.8422	52.7105	0.4587	0.6233	-0.0379	0.0332	0.0083	21.8526	1.3016	0.0095	-0.0217	98.8905	161.11	63.2203	0.626913
355	K5_L2C13	0.0527	21.8943	53.1785	0.5623	0.5686	-0.0108	-0.0187	0.0856	21.8663	1.1857	-0.0134	-0.0279	99.3938	163.18	63.3336	0.628518
355	K5_L2C13	0.0316	21.7756	53.1677	0.5391	0.593	0.0217	0.0166	0.0635	21.6807	1.1056	-0.0191	0.031	99.0261	165.18	63.3665	0.629963
355	K5_L2C13	0.027	21.8186	53.1548	0.4874	0.638	0	-0.0187	0	21.8024	1.1229	0.0134	-0.0775	99.0644	167.19	63.2274	0.629003
355	K5_L2C13	0.0129	21.9509	53.1629	0.5688	0.5931	-0.0325	0.0187	0.0718	21.7946	1.0909	-0.0318	-0.0217	99.2647	169.2	63.4349	0.630821
355	K5_L2C13	0.0481	21.8316	52.6076	0.5026	0.6073	0.0271	-0.0332	0.0304	21.7874	1.1945	-0.0006	-0.0341	98.6366	171.2	63.2971	0.628558
355	K5_L2C13	0.007	21.8629	52.4424	0.4719	0.6313	0.0433	-0.0104	0.0966	21.8358	1.1885	0.0324	-0.0217	98.612	173.21	63.2491	0.628463
355	K5_L2C13	0.0364	21.7303	53.152	0.4614	0.6073	0.0054	0.0187	0.1353	21.8524	1.1678	-0.0146	0.0558	99.2228	175.22	63.1221	0.627085
355	K5_L2C13	0.0059	21.6853	52.85	0.546	0.62	0.0054	-0.0166	0.149	21.7719	1.3077	-0.0013	-0.0496	98.9412	177.23	63.14	0.62598
355	K5_L2C13	0.0176	21.7846	52.7482	0.6419	0.6581	0.0758	0.0104	0.0911	21.8017	1.2006	0.014	0.031	99.075	179.29	63.1654	0.627846
355	K5_L2C13	0.0235	21.8191	53.2226	0.6156	0.5911	0.0162	0.0021	0.0193	21.8749	1.2988	0.0235	0	99.5067	181.3	63.2152	0.626469
355	K5_L2C13	-0.0118	21.8847	52.1514	0.6187	0.602	0.0162	0.0083	0.1076	21.9776	1.1908	-0.0114	0.0403	98.5976	183.31	63.1654	0.627238
355	K5_L2C13	0.0317	21.7636	52.3686	0.6702	0.595	0.0162	0.0311	0.1435	21.846	1.1794	-0.0127	0.0434	98.6887	185.31	63.1805	0.627389
355	K5_L2C13	-0.0047	21.6698	52.7653	0.7229	0.5783	0.0379	0.0249	0.0469	21.7834	1.1975	0.0134	0.0651	98.9053	187.32	63.1666	0.626829
355	K5_L2C13	0.0399	21.6702	53.0208	0.7257	0.5904	0.0379	-0.0042	0.0939	21.8532	1.0844	-0.021	0.0341	99.1503	189.33	63.0791	0.627289
355	K5_L2C13	0.0176	21.7061	53.0094	0.6921	0.591	-0.0162	-0.0291	0.0469	22.1101	1.1764	0.0197	-0.0155	99.3693	191.34	62.8534	0.624131
355	K5_L2C13	-0.0129	21.6716	52.7951	0.7165	0.5802	0.0054	0.0187	0.1103	22.0249	1.289	-0.0369	0.0403	99.2518	193.34	62.9176	0.623468
355	K5_L2C13	0.0164	21.6898	53.0459	0.653	0.5514	-0.0054	0.0228	-0.0055	21.8378	1.4651	0.0108	-0.0589	99.2932	195.41	63.1675	0.623753
355	K5_L2C13	0.0188	21.6245	52.3867	0.6876	0.6077	0.0054	-0.0228	0.069	21.8834	1.2117	-0.0165	0.0372	98.532	197.42	62.976	0.625177
355	K5_L2C13	0.0305	21.6741	53.0366	0.7775	0.5992	0.0217	-0.027	0.0856	21.8174	1.1618	0.0248	-0.0248	99.2293	199.42	63.1085	0.626897
355	K5_L2C13	0.02	21.6815	52.5156	0.7752	0.6336	-0.0108	0.0166	0.0331	21.8713	1.3103	0.0032	-0.0031	98.8604	201.43	63.0156	0.624906
355	K5_L2C13	0.0199	21.7538	52.9405	0.7925	0.5563	0.0433	-0.0166	0.1214	21.8508	1.23	0.0191	0.0341	99.3617	203.44	63.2161	0.626716
355	K5_L2C13	0.007	21.6997	52.5046	0.7282	0.6288	-0.0216	0.0145	0.0414	21.8674	1.2834	-0.0006	-0.0403	98.7751	205.45	63.0455	0.625417
355	K5_L2C13	0.0047	21.682	52.9781	0.7874	0.6249	0.0325	-0.0083	0.127	21.8296	1.2034	-0.0191	-0.0434	99.2696	207.45	63.0705	0.62643
355	K5_L2C13	0.0375	21.6943	52.7831	0.7538	0.6361	0.0054	-0.0083	0.1132	21.8682	1.1586	-0.0184	0.0527	99.1029	209.46	63.0293	0.626632
355	K5_L2C13	0.0281	21.6677	53.4141	0.7301	0.6113	-0.0054	0.0042	0.1049	21.7971	1.3109	-0.0095	0.031	99.6993	211.53	63.1066	0.625501
355	K5_L2C13	-0.0035	21.65	53.2677	0.7821	0.6316	0	-0.0042	0.0635	21.8178	1.177	-0.0095	0.0155	99.4053	213.53	63.0394	0.626476
355	K5_L2C13	-0.0188	21.7011	52.1543	0.7466	0.5821	0.0217	0	0.1076	21.8624	1.108	-0.0267	0	98.2838	215.54	63.1137	0.627285
355	K5_L2C13	0.0164	21.6268	52.6198	0.7716	0.6199	0.0162	0.0083	0.0966	21.8298	1.2419	-0.0286	0.0341	98.8814	217.55	63.0175	0.625436
355	K5_L2C13	0.0047	21.6768	53.0202	0.7258	0.5734	0.0108	0.0042	0.0745	21.7125	1.2958	-0.0013	-0.0651	99.0986	219.56	63.2539	0.626613
355	K5_L2C13	-0.0141	21.7611	52.6859	0.7347	0.6366	0.0325	-0.0021	0.1131	21.9673	1.3697	-0.0146	-0.0124	99.3009	221.56	62.9987	0.624192
355	K5_L2C13	0.034	21.6788	52.5546	0.681	0.6443	-0.0054	0.0436	0.1159	21.7595	1.1617	-0.0064	-0.0682	98.6736	223.57	63.1137	0.627538
355	K5_L2C13	0.027	21.768	52.8916	0.6126	0.5993	0.0217	0.0228	0.011	21.8309	1.2155	0.0223	0.0093	99.032	225.58	63.1951	0.627219
355	K5_L2C13	0.0059	21.7705	52.6613	0.6828	0.6393	-0.0108	0.0062	0.1214	22.011	1.2062	0.0006	0	99.1053	227.64	62.9605	0.62552
355	K5_L2C13	0.0258	21.7855	53.0262	0.7018	0.6252	0.0162	-0.0249	0.1132	21.6727	1.2785	0.0076	0.062	99.3148	229.65	63.3427	0.628365
355	K5_L2C13	0.0187	21.7927	53.2347	0.7255	0.627	-0.0054	-0.0395	0.0912	21.7204	1.0611	-0.0287	0.0062	99.2776	231.66	63.2987	0.630201
355	K5_L2C13	-0.0023	21.6858	53.318	0.748	0.6744	0.0054	0.0083	0.0746	21.8029	1.2307	0	0.031	99.5791	233.66	63.0368	0.626462
355	K5_L2C13	-0.0164	21.7732	52.6178	0.7105	0.6121	0.0379	-0.0021	0.0966	21.8551	1.1976	0.0076	0.0279	98.9363	235.67	63.1589	0.627213
355	K5_L2C13	-0.0082	21.6824	53.0299	0.7029	0.6753	-0.0108	0.0042	-0.0083	21.6845	1.2278	-0.0038	0.0062	99.0131	237.68	63.1539	0.627659
355	K5_L2C13	0.0317	21.7204	52.9528	0.6937	0.6679	-0.0108	0.0228	0.069	21.7956	1.2008	0.0166	-0.0744	99.1714	239.69	63.09	0.627216
355	K5_L2C13	0.0106	21.6848	52.6652	0.723	0.6937	0.0162	-0.0187	0.0994	21.7053	1.2218	-0.0166	-0.0279	98.8199	241.69	63.1108	0.627535
355	K5_L2C13	0.0258	21.676	52.529	0.7169	0.6654	-0.0162	0.0042	0.0331	21.7553	1.1888	0.0121	-0.0434	98.6065	243.76	63.0872	0.627271
355	K5_L2C13	0.0188	21.6196	52.872	0.729	0.6766	-0.0271	-0.0062	0.1242	21.8477	1.1322	0.0172	-0.0093	99.0372	245.77	62.9166	0.626305
355	K5_L2C13	0.0082	21.7142	53.1657	0.768	0.5814	-0.0325	0.0125	0.127	21.8981	1.2363	0.0013	0.0527	99.5654	247.77	63.0919	0.625746
355	K5_L2C13	0.007	21.6587	52.7724	0.7229	0.6679	0	0.0042	0.0801	21.7959	1.1175	0.0057	-0.0186	98.8324	249.78	63.0235	0.627407
355	K5_L2C13	0.0106	21.6866	52.9887	0.7697	0.6515	-0.0054	0.0083	0.1325	21.8327	1.3376	-0.0095	-0.0093	99.4181	251.79	63.0372	0.625072
355	K5_L2C13	0.0047	21.6779	52.7999	0.8136	0.65	-0.0054	0.0042	0.0745	21.776	1.1947	0.0382	-0.0279	99.0337	253.79	63.0882	0.62702
355	K5_L2C13	0.0012	21.7007	52.9051	0.8184	0.6792	0.0271	0.0062	0.0994	21.7753	1.1771	0.0159	-0.031	99.2055	255.8	63.0749	0.627455
355	K5_L2C13	0.0505	21.6621	52.859	0.7276	0.6789	0.0108	-0.0228	0.138	21.6202	1.3794	0.0242	-0.0806	99.1507	257.81	63.1938	0.626532
355	K5_L2C13	0.0223	21.6481	52.8832	0.7729	0.6721	0.0163	-0.0042	0.0635	21.6072	1.1773	-0.0191	0.0527	98.9156	259.88	63.2012	0.628602
355	K5_L2C17	2.3846	0.2057	74.9423	11.4817	0.7886	0.0505	3.4114	0.3724	1.7961	0.0495	0.0214	0.0032	95.5074	0	11.5556	0.165697
355	K5_L2C17	1.7389	0.3503	79.4781	10.9615	0.8716	0.0168	3.5002	0.4769	2.3418	0.1083	-0.0076	-0.0284	99.8444	2.02	15.2938	0.203006
355	K5_L2C17	3.496	0.8614	67.1699	17.0761	4.4596	0.0389	1.6538	0.2264	2.6937	0.1111	0.0007	0.0158	97.8034	4.03	15.4434	0.35366
355	K5_L2C17	0.0094	20.3435	53.3845	0.852	1.0365	0.0487	0.0145	0.0663	21.5647	1.2516	-0.0287	-0.0372	98.5717	6.05	61.3012	0.613638
355	K5_L2C17	-0.0035	20.7725	53.3537	0.6001	0.7517	-0.0379	-0.0145	0.0635	21.71	1.2573	0.0204	0.0062	98.5353	8.06	62.0224	0.617017
355	K5_L2C17	-0.0129	20.8092	52.6847	0.6076	0.7085	-0.0108	0.0187	0.0745	21.8286	1.2476	0.007	-0.0093	97.9862	10.08	61.9984	0.616318
355	K5_L2C17	0.0024	20.6238	53.041	0.6764	0.7424	0.0325	0.0166	0.1104	21.8522	1.2626	0.0064	-0.0651	98.3667	12.09	61.7177	0.613802
355	K5_L2C17	0.0507	20.607	53.0223	0.6944	0.7786	0.0379	0.0021	0.0552	21.9854	1.2385	-0.0025	-0.0744	98.4721	14.11	61.513	0.612495
355	K5_L2C17	0.0141	20.889	52.7634	0.7392	0.6857	-0.0216	-0.0083	0.0744	22.0937	1.3484	-0.0273	-0.0093	98.6081	16.12	61.8452	0.613489
355	K5_L2C17	0.0059	20.9493	53.0414	0.6319	0.7291	0.0054	0	0.1381	21.6618	1.2724	0	0.0558	98.4911	18.14	62.3019	0.619355
355	K5_L2C17	0.0223	21.1142	52.6115	0.5708	0.7664	0.0325	-0.0125	0.0359	21.471	1.2815	-0.0019	0.0124	97.9185	20.15	62.6346	0.62307
355	K5_L2C17	0.0282	21.0704	52.7208	0.6291	0.7781	0.0054	0.0166	0.1215	21.7012	1.29	-0.0108	0.0124	98.3738	22.17	62.3313	0.620127
355	K5_L2C17	-0.0211	21.2045	52.8788	0.6048	0.7394	0.0162	-0.0104	0.1132	21.5706	1.4272	-0.0134	0	98.5546	24.18	62.6668	0.621535
355	K5_L2C17	0.0176	21.0204	52.9172	0.676	0.729	0	-0.0311	0.127	21.6612	1.3765	-0.0331	-0.0713	98.5249	26.2	62.3822	0.61908
355	K5_L2C17	0.02	20.9409	52.5134	0.8173	0.743	0.0108	0.0249	0.1048	21.8993	1.4888	0	-0.0155	98.5631	28.21	62.0282	0.614605
355	K5_L2C17	0.0094	20.8032	52.4812	0.8231	0.8374	0.0216	-0.029	0.0993	21.7166	1.4861	-0.0019	-0.031	98.278	30.23	61.9365	0.614926
355	K5_L2C17	0.0176	21.0318	52.6797	0.5466	0.7395	0.0108	-0.0145	0.0607	21.6787	1.2631	-0.0159	-0.0527	98.0285	32.24	62.3628	0.620205
355	K5_L2C17	-0.0012	20.8561	52.8291	0.7805	0.8571	0.0216	-0.0083	0.138	21.7619	1.2394	-0.0083	0	98.4838	34.26	61.9236	0.617619
355	K5_L2C17	0.0188	21.0907	53.225	0.7195	0.8025	0.0217	-0.0291	0.1187	21.881	1.2186	0.0356	0.0744	99.2067	36.27	62.1364	0.619255
355	K5_L2C17	0.0341	21.2244	52.7244	0.5582	0.7339	-0.0325	-0.0187	0.0911	21.7923	1.2066	0.0032	0.0093	98.3774	38.29	62.4666	0.621773
355	K5_L2C17	0.0082	21.478	52.9194	0.5569	0.8396	-0.0054	-0.0187	0.069	21.732	1.2483	0.0025	-0.1054	98.854	40.3	62.6675	0.624746
355	K5_L2C17	0.0023	21.291	52.851	0.5221	0.8255	-0.0108	0.0042	0.0746	21.402	1.1866	-0.0153	-0.0155	98.1593	42.32	62.8226	0.62673
355	K5_L2C17	0.0282	21.3254	52.4191	0.5179	0.8576	0.0595	0.0332	0.1216	21.5287	1.1475	-0.0064	0.0465	98.0853	44.33	62.6863	0.626208
355	K5_L2C17	0.0164	21.4405	52.5772	0.6183	0.9538	0.0433	-0.0208	0.0083	21.4645	1.1238	-0.0293	0.0434	98.2896	46.35	62.7512	0.628377
355	K5_L2C17	-0.0246	21.5307	53.0907	0.6261	0.8978	-0.0379	0.0187	0.0387	21.4628	1.1005	-0.0166	0.0372	98.8032	48.36	62.925	0.629618
355	K5_L2C17	0	21.5831	52.6939	0.5954	0.9253	0	-0.0021	0.0581	21.057	1.1605	-0.0051	-0.0062	98.0733	50.38	63.3661	0.633766
355	K5_L2C17	0.0023	21.4651	52.7399	0.6634	1.8396	0.0325	0.0083	0.0971	20.5375	0.9592	0.0141	-0.0062	98.3589	52.39	62.5647	0.640148
355	K5_L2C17	0.0315	21.9461	53.0429	0.5567	0.9543	0.0434	0.0166	0.1329	20.8811	1.018	-0.0166	-0.0807	98.6235	54.41	63.8969	0.640974
355	K5_L2C17	-0.0023	21.9812	52.5306	0.7501	1.0178	-0.0271	0.0166	0.119	20.8778	1.0297	-0.0051	0.0497	98.3726	56.42	63.8524	0.641252
355	K5_L2C17	0.007	21.8993	53.0843	0.9751	1.1081	0.0054	-0.0083	0.1524	20.6323	1.0514	-0.0019	0.0186	98.9339	58.44	63.9017	0.64275
355	K5_L2C17	0.0198	22.0501	52.4797	1.1811	1.0699	-0.0488	-0.0062	0.2161	20.754	0.851	0.0026	-0.1024	98.6242	60.45	63.984	0.645184
355	K5_L2C17	0.0209	21.8074	52.455	1.4394	1.6197	0.0487	0.0229	0.2165	20.1352	0.9149	0.0064	0.0342	98.7211	62.47	63.6392	0.648587
355	K5_L2C17	0.0162	21.8647	52.8482	1.5126	1.7627	0.0108	-0.0187	0.2028	20.0547	0.8464	-0.0186	-0.0839	99.119	64.48	63.5932	0.65081
355	K5_L2C17	0.0173	22.0989	52.46	0.9915	1.9172	0.0704	-0.0395	0.1808	19.3867	0.8623	-0.0109	0.0093	97.9944	66.5	64.3295	0.660366
355	K5_L2C17	0.0173	22.6056	53.2293	0.9932	1.2323	0.0163	0.0042	0.1472	19.7249	0.9367	-0.0058	0.0062	98.9131	68.51	65.4157	0.660918
355	K5_L2C17	0.0196	22.8135	53.0201	0.8197	1.0225	0.0163	0.0167	0.2499	19.6777	0.9756	-0.0353	-0.0373	98.6315	70.53	65.9589	0.663051
355	K5_L2C17	0.0531	22.3435	52.5932	0.9644	1.3849	0	0.0187	0.2249	19.8195	0.9451	-0.0238	0.0248	98.3723	72.54	64.8437	0.65718
355	K5_L2C17	0.0231	22.6048	53.2076	0.6688	0.8399	0.0054	0.0271	0.0694	19.9013	0.8168	0.0199	-0.0591	98.1841	74.56	65.7633	0.660315
355	K5_L2C17	0.0243	22.3415	53.2175	0.7428	0.7876	0.038	0.0437	0.1469	20.313	1.0698	0.0288	-0.0031	98.7539	76.57	65.1298	0.650506
355	K5_L2C17	0.0465	22.1737	52.9237	0.7761	0.7662	0.0271	0.0291	0.0415	20.7515	1.1226	0.0109	-0.0124	98.6688	78.59	64.5225	0.643593
355	K5_L2C17	-0.0128	22.009	52.9362	0.7583	0.7256	0.0217	0.0021	0.0637	20.9314	1.1554	-0.0287	0.0124	98.6157	80.6	64.217	0.639651
355	K5_L2C17	-0.0047	21.9671	52.764	0.7341	0.726	0.0163	-0.0208	0.0774	21.1448	1.1008	0.0287	0.0248	98.584	82.62	63.949	0.637566
355	K5_L2C17	0.0093	21.9279	52.9919	0.7743	0.7301	0.0108	0.0208	0.083	21.2	1.1339	-0.0064	0	98.8822	84.63	63.8447	0.636233
355	K5_L2C17	0.0094	21.9725	52.1913	0.6184	0.6264	0.0054	0.0145	0.1271	21.2239	1.1064	0.0153	-0.0559	97.9106	86.65	64.0053	0.636744
355	K5_L2C17	0.014	21.8789	52.9665	0.6122	0.7168	0.0054	0.0042	0.1189	21.2736	1.2049	0.0102	-0.0217	98.8057	88.66	63.7341	0.634211
355	K5_L2C17	-0.0117	21.8245	52.7669	0.6398	0.6321	-0.0271	-0.0499	0.105	21.2093	1.199	-0.0077	0.0093	98.386	90.68	63.8571	0.634359
355	K5_L2C17	0.0152	21.643	52.9125	0.6346	0.6346	0	-0.0104	0.0359	21.2904	1.1005	-0.0006	0.0248	98.2915	92.7	63.5757	0.632614
355	K5_L2C17	0.0211	21.5945	52.7427	0.7631	0.5658	0.0108	-0.0145	0.0829	21.4484	1.1807	-0.0064	0.0186	98.4286	94.71	63.4506	0.629619
355	K5_L2C17	0.0176	21.5903	52.4888	0.869	0.6052	0.0704	-0.0042	0.0028	21.6025	1.228	0.0064	-0.0155	98.4809	96.73	63.2328	0.6275
355	K5_L2C17	-0.007	21.4716	52.8304	0.7691	0.6481	0.0325	-0.0395	0.0635	21.5493	1.1597	0.0045	0.0279	98.5567	98.74	63.1027	0.627467
355	K5_L2C17	0.0153	21.5718	52.2784	0.7574	0.7203	0.0271	-0.0062	0.0801	21.5845	1.2874	0.0229	-0.031	98.3451	100.76	63.0787	0.626868
355	K5_L2C17	0.0211	21.4876	52.6921	0.7115	0.7179	-0.0108	0.0062	0.1602	21.7359	1.2219	0.0159	-0.0589	98.7703	102.77	62.8343	0.625084
355	K5_L2C17	0.0294	21.4457	52.3661	0.7325	0.6878	-0.0271	0.0104	0.1546	21.6431	1.2842	-0.0019	-0.0093	98.3537	104.79	62.9244	0.62493
355	K5_L2C17	0.0188	21.583	52.4561	0.7068	0.6553	-0.0325	0.0436	0.0166	21.5139	1.1982	-0.0191	-0.0434	98.1922	106.8	63.2503	0.628638
355	K5_L2C17	0.0411	21.502	52.305	0.7312	0.7287	0	0.0166	0.1022	21.4948	1.1418	-0.0229	0.0558	98.1192	108.82	63.085	0.628545
355	K5_L2C17	0.0305	21.5222	53.1452	0.8808	0.6845	-0.0054	-0.0083	0.058	21.4568	1.33	0.0338	-0.0558	99.1417	110.83	63.2052	0.627195
355	K5_L2C17	0.0246	21.5074	52.4441	0.7517	0.7421	-0.0217	-0.0104	0.0911	21.3871	1.3771	0.0045	0.0124	98.3421	112.85	63.185	0.62726
355	K5_L2C17	-0.0023	21.5129	52.1592	0.7574	0.6302	-0.0596	0.0145	0.0856	21.5522	1.1297	0.0299	0.0341	97.9059	114.86	63.1683	0.628198
355	K5_L2C17	0.0129	21.5522	52.407	0.8041	0.7198	0.0054	-0.0062	0.1823	21.5414	1.118	-0.0472	0.0155	98.3586	116.88	63.1028	0.628858
355	K5_L2C17	0.0364	21.6075	52.3585	0.8158	0.6687	-0.0271	-0.0104	0.069	21.618	1.2068	0.007	0.0558	98.4435	118.89	63.1509	0.627747
355	K5_L2C17	0.0153	21.5722	52.481	0.8155	0.6817	-0.0325	0.0187	0.0773	21.5658	1.2428	0.0325	0.0744	98.5772	120.91	63.1497	0.627526
355	K5_L2C17	0.0164	21.6542	52.0105	0.8099	0.7416	0	0.0187	0.163	21.4733	1.1122	0.0178	0.031	98.0487	122.92	63.2543	0.63072
355	K5_L2C17	0.0469	21.5357	52.7438	0.7628	0.7117	0.0217	0.0145	0.1768	21.4827	1.1358	0.0089	0.0434	98.6846	124.94	63.1566	0.629098
355	K5_L2C17	0.0328	21.489	52.78	0.865	0.7772	0.0379	0.0187	0.1354	21.5589	1.2614	-0.0089	0.0124	98.9688	126.95	62.9401	0.6265
355	K5_L2C17	-0.0106	21.4043	52.0499	1.1524	0.8833	-0.0271	-0.0021	0.1216	21.544	1.1715	-0.0268	0.0062	98.3332	128.97	62.7229	0.626664
355	K5_L2C17	-0.0035	21.2057	52.0076	1.2002	0.9525	-0.0757	0.0021	0.2514	21.4131	1.1624	0.0013	-0.124	98.1963	130.98	62.5484	0.625929
355	K5_L2C17	-0.0293	21.2525	51.9293	1.1458	0.8945	-0.0054	0.0083	0.0939	21.5691	1.1474	0.0522	-0.0155	98.0929	133	62.5156	0.62499
355	K5_L2C17	0.0481	21.2024	52.5358	1.1091	0.9233	0.0217	-0.0125	0.0829	21.543	1.1599	0.0083	0.0621	98.6965	135.01	62.4491	0.624576
355	K5_L2C17	0.0023	21.3604	52.4284	1.1031	0.9553	0	-0.0104	0.1382	21.557	1.1717	0.03	-0.0558	98.7463	137.03	62.5665	0.626048
355	K5_L2C17	0.0352	21.3466	52.062	1.0726	0.9801	0.0162	-0.0042	0.1741	21.4535	1.1687	-0.0134	0	98.3089	139.04	62.6252	0.626995
355	K5_L2C17	-0.0047	21.4284	52.2452	1.0937	0.9472	0.0325	-0.0145	0.1575	21.4162	1.1597	-0.0402	0.0961	98.5764	141.06	62.7966	0.628368
355	K5_L2C17	0.0141	21.3482	51.9031	1.0519	0.9158	-0.0162	-0.0042	0.152	21.4134	0.9927	-0.0064	0.0713	97.8626	143.07	62.7534	0.629276
355	K5_L2C17	0.048	21.3352	52.256	1.0415	0.8894	0.0487	-0.0166	0.0802	21.3939	1.0615	-0.007	-0.0527	98.1544	145.09	62.7944	0.628613
355	K5_L2C17	0.0047	21.2678	52.5578	1.0471	0.9113	-0.0108	0.0166	0.1134	21.4776	1.0677	-0.0045	0	98.464	147.1	62.6047	0.626939
355	K5_L2C17	0.0129	21.3605	52.4697	1.0691	0.8828	0.0108	-0.0187	0.0857	21.6386	1.1329	0.007	-0.0124	98.6699	149.12	62.5782	0.625614
355	K5_L2C17	0.0234	21.3301	52.2222	1.0417	0.8877	0.0054	0.0228	0.1686	21.5507	1.0466	-0.0108	0.0031	98.3023	151.13	62.6289	0.627088
355	K5_L2C17	0.0305	21.3051	52.4917	1.2142	0.8594	0.0054	0.0166	0.1962	21.5365	1.1033	0.0306	0.0093	98.7989	153.15	62.6536	0.626367
355	K5_L2C17	0.0082	21.4043	52.3926	1.0741	0.9035	-0.0054	0.0312	0.1576	21.4787	1.0321	-0.0045	0.0248	98.5072	155.16	62.7635	0.628796
355	K5_L2C17	0.0117	21.3782	52.5173	1.0703	0.8742	-0.0433	0.0332	0.1078	21.5207	1.0408	0.0185	0.0248	98.5976	157.18	62.7304	0.627985
355	K5_L2C17	0.0504	21.5149	52.276	0.9858	0.8934	0.0108	-0.0187	0.0967	21.4906	1.1061	0.0006	-0.0807	98.4254	159.19	62.885	0.629101
355	K5_L2C17	0.0141	21.402	52.6759	0.9845	0.8701	-0.0217	0.0145	0.1659	21.5111	1.184	0.0045	0.0124	98.839	161.21	62.7718	0.626847
355	K5_L2C17	0.0293	21.4673	52.2024	0.9109	0.8859	0.0162	0.0021	0.105	21.3908	1.1626	0.0108	0.0744	98.258	163.22	62.9464	0.629024
355	K5_L2C17	0.0304	21.6018	52.2189	0.7894	0.8532	0.0162	0.0042	0.0691	21.2833	1.1094	-0.0013	0.031	98.0069	165.24	63.2467	0.632151
355	K5_L2C17	0.0082	21.6163	52.6994	0.7709	0.9051	0.0054	0.0062	0.0553	21.2513	1.2262	-0.0102	0	98.5443	167.25	63.2265	0.631413
355	K5_L2C17	0.0351	21.5301	52.6208	0.75	0.8477	0.0433	-0.0208	0.1106	21.3772	1.1035	0	0.0621	98.4803	169.27	63.0792	0.630465
355	K5_L2C17	0.041	21.5473	52.4106	0.8977	0.8485	-0.0271	0.0623	0.0608	21.3681	1.1065	0.0217	0.0155	98.38	171.28	63.1062	0.630714
355	K5_L2C17	0.0187	21.594	52.5659	0.8558	0.8334	0.0325	-0.0187	0.0691	21.3629	1.1158	-0.0198	-0.0372	98.4482	173.3	63.182	0.631175
355	K5_L2C17	0.0293	21.51	52.5672	0.8406	0.817	-0.0108	0.0125	0.1272	21.2154	1.1243	0.0045	-0.0993	98.2478	175.31	63.2668	0.631709
355	K5_L2C17	-0.007	21.403	52.1034	0.8844	0.8947	0.0108	-0.0104	0.1826	21.108	1.0325	0	-0.0031	97.6193	177.33	63.159	0.632643
355	K5_L2C17	0.0282	21.4341	52.2893	0.9435	0.865	-0.0108	0.0062	0.1437	21.6796	0.9807	0.0223	-0.0558	98.3926	179.35	62.64	0.627583
355	K5_L2C17	0.0352	21.4972	52.338	0.9434	0.9103	-0.0162	0.0228	0.1078	21.5741	1.0883	-0.0159	0.031	98.548	181.36	62.7575	0.628234
355	K5_L2C17	0.0176	20.8051	51.3082	1.1547	0.86	-0.0054	0.0187	0.1299	21.2433	1.1358	-0.0038	0	96.6732	183.38	62.4018	0.623509
355	K5_L2C17	0.0411	21.4576	51.7343	0.9886	0.9012	0.0054	-0.0042	0.1271	21.5193	1.1297	-0.0261	-0.1055	97.9042	185.39	62.7828	0.627936
355	K5_L2C17	0.0035	21.3456	52.2665	1.0664	0.8937	-0.0379	0.0208	0.1436	21.7254	1.1832	-0.0045	0.0465	98.6952	187.41	62.4584	0.624037
355	K5_L2C17	0.0023	21.3411	52.2916	1.1129	0.8941	-0.0379	0.0062	0.1492	21.6613	1.0286	0.014	0.0093	98.5107	189.42	62.5187	0.626255
355	K5_L2C17	0.0199	21.3889	52.1915	0.9592	0.9418	0.0433	-0.0104	0.094	21.4136	1.1331	0.0229	0.0248	98.2331	191.44	62.7633	0.628243
355	K5_L2C17	0.007	21.3681	51.9863	1.0442	0.9471	-0.0271	0.0104	0.152	21.6096	1.1567	0.0076	0.0155	98.3046	193.45	62.5317	0.625747
355	K5_L2C17	0.0399	21.3085	52.3634	1.084	0.9206	0.0216	0.0519	0.1271	21.7461	1.1268	-0.0089	-0.0403	98.7901	195.47	62.361	0.624002
355	K5_L2C17	0.0305	21.3984	52.2442	1.0536	0.9463	0.0325	-0.0062	0.1934	21.4572	1.1745	-0.0064	-0.1489	98.5307	197.48	62.7227	0.627463
355	K5_L2C17	0.0199	21.503	51.665	1.0063	0.9539	0.0541	0.0062	0.0442	21.6256	0.9927	0.0376	0.0155	97.9241	199.5	62.6537	0.628764
355	K5_L2C17	0.0434	21.4866	52.3405	0.9773	0.9395	0.0162	0	0.1686	21.5134	1.0677	0.0281	0.0124	98.5938	201.51	62.7699	0.62896
355	K5_L2C17	0.034	21.4099	52.1169	1.0634	1.0066	0.0162	0	0.1327	21.5434	0.9783	0.023	0.0155	98.3401	203.53	62.5672	0.628752
355	K5_L2C17	0.0199	21.4494	52.5114	0.9475	0.929	-0.0054	0.0208	0.2046	21.3913	1.1752	0.0453	-0.0186	98.6945	205.54	62.8693	0.628692
355	K5_L2C17	0.0223	21.5053	52.0729	0.7896	0.9968	0.065	0.027	0.1189	21.4031	1.1124	0.0057	-0.0465	98.1189	207.56	62.8282	0.629835
355	K5_L2C17	0.0047	21.5703	52.4165	0.7436	1.0363	0.0542	-0.0374	0.1107	21.2518	1.0027	0.0172	0.0497	98.2576	209.57	63.0025	0.633264
355	K5_L2C17	0.0117	21.5355	52.3121	0.8298	0.9238	0.0108	0.0249	0.1245	21.356	0.9337	0.0421	0.0466	98.1514	211.59	63.0061	0.632531
355	K5_L2C17	0.0105	21.5893	52.2285	0.8074	0.9642	0.0163	-0.0104	0.1217	21.2053	1.107	0.0147	-0.0528	98.0647	213.6	63.1666	0.632852
355	K5_L2C17	0.0211	21.5284	52.4147	0.8087	0.9567	-0.0487	-0.0083	0.1632	21.4157	1.077	0.0198	-0.0248	98.4053	215.62	62.8932	0.630326
355	K5_L2C17	0.0176	21.515	52.419	1.0451	0.9631	0.0433	-0.0083	0.2102	21.423	1.0232	-0.0255	-0.0497	98.6594	217.63	62.8627	0.63067
355	K5_L2C17	-0.0117	21.477	51.8689	1.0301	0.9258	0.092	-0.0042	0.1853	21.2547	1.1065	0.0421	0.152	98.1344	219.65	63.045	0.63113
355	K5_L3C4	3.2884	0.1914	76.1116	11.749	1.2652	0.0952	3.3545	0.5006	1.9444	0.1146	0.0014	-0.0063	98.6163	0	8.73363	0.142061
355	K5_L3C4	2.8361	0.1155	76.2833	13.7046	2.0499	0.1401	2.843	0.469	1.6266	0.0527	-0.0173	-0.0095	100.121	2.05	4.61755	0.109173
355	K5_L3C4	1.994	0.0849	78.0104	10.9007	0.9706	0.1907	3.6916	0.5652	1.759	0.0589	-0.0394	0.0221	98.2481	4.1	4.79855	0.076822
355	K5_L3C4	1.6508	0.3643	78.8382	10.6169	0.6481	0.0955	3.767	0.4747	1.8923	0.1023	0	-0.0063	98.45	6.15	19.2581	0.245487
355	K5_L3C4	1.9441	9.1338	65.0364	8.1832	1.9562	0.033	1.427	0.3942	12.2744	0.5769	-0.0186	0.0626	101.022	8.2	52.4159	0.55873
355	K5_L3C4	0.0204	23.3468	52.2069	2.0856	1.7372	0.0163	0.0021	0.3073	17.927	0.6522	-0.0311	0.0218	98.3237	10.25	67.3745	0.69126
355	K5_L3C4	0.0547	24.6066	52.1845	2.793	1.7696	-0.0436	0.0272	0.3646	16.394	0.5124	0.0313	-0.0281	98.738	12.3	70.1535	0.721714
355	K5_L3C4	0.0753	23.8174	51.5348	3.1786	1.7875	-0.0381	0.0376	0.3163	17.0211	0.611	0.0169	0.0156	98.412	14.35	68.7354	0.70647
355	K5_L3C4	0.0349	22.1	52.5323	1.052	1.02	0.0054	0.0083	0.1331	20.3605	1.133	0.0051	-0.0559	98.3846	16.4	64.5157	0.646845
355	K5_L3C4	0.0176	21.4035	52.3296	0.7461	0.7628	-0.0271	-0.0187	0.1631	21.8465	0.993	-0.0019	-0.0124	98.2622	18.45	62.5696	0.625405
355	K5_L3C4	0.0176	21.4968	52.4765	0.7082	0.7789	0.0108	-0.0021	0.1161	21.5463	1.0914	0.0051	0.0248	98.2726	20.5	62.9593	0.628484
355	K5_L3C4	0.0504	21.7493	52.2019	0.7029	0.8524	0.0054	-0.0042	0.141	21.4651	1.0766	-0.0077	0.1024	98.3474	22.55	63.2179	0.632196
355	K5_L3C4	0.0362	21.9543	52.3361	0.7319	0.8768	0.0163	-0.0104	0.1024	21.0328	1.027	0.016	-0.0838	98.1297	24.6	63.8508	0.639376
355	K5_L3C4	0.0268	21.921	52.3656	0.8304	0.9647	0.0434	-0.0104	0.1827	20.8925	1.1945	-0.023	-0.0248	98.4216	26.65	63.8446	0.63872
355	K5_L3C4	0.028	21.7813	51.5263	1.1032	1.1085	-0.0379	0.027	0.2493	20.6837	0.9795	0.0275	0.0342	97.5486	28.7	63.7226	0.641736
355	K5_L3C4	0.0502	21.7749	51.6341	1.2999	1.1249	-0.0108	0.0104	0.2105	20.7808	1.0424	-0.009	-0.0559	97.928	30.75	63.5925	0.639967
355	K5_L3C4	0.021	21.5111	51.6952	1.5523	1.1814	0.0163	0.0042	0.1856	20.8058	0.9706	0.0185	-0.0776	97.9619	32.8	63.2082	0.637659
355	K5_L3C4	0.0547	21.6427	51.8061	1.5921	1.2615	-0.0325	0.0042	0.2134	20.6674	1.0277	0.007	-0.0093	98.2767	34.85	63.3872	0.639921
355	K5_L3C4	0.0175	21.5386	51.4946	1.8699	1.1816	0	0.0145	0.2217	20.7457	0.9917	-0.0154	0.0497	98.1255	36.9	63.3003	0.638365
355	K5_L3C4	0.0408	21.4617	51.5585	2.0345	1.2066	0.0596	0.0083	0.3104	20.687	0.9172	-0.0013	-0.028	98.2846	38.95	63.2451	0.638968
355	K5_L3C4	0.0221	21.593	51.5282	1.9883	1.249	0.0433	-0.0104	0.2052	20.6268	0.9144	-0.0058	0.0062	98.1766	41	63.3929	0.641046
355	K5_L3C4	0.0326	22.1275	51.911	1.1245	1.0899	0.0054	0.0187	0.2661	20.4719	1.0341	-0.0058	-0.0031	98.0817	43.05	64.3327	0.64701
355	K5_L3C4	0.007	22.3502	53.1149	0.6269	0.9466	0.0217	-0.0062	0.0749	20.4453	1.0493	0.0167	0.0528	98.7062	45.1	64.7828	0.649412
355	K5_L3C4	0.0221	22.384	53.0139	0.5267	0.8868	0.0054	0.0291	0.1137	20.4517	1.0373	-0.0026	0.0901	98.5607	47.15	64.8913	0.649817
355	K5_L3C4	0.0221	22.2587	52.5513	0.5367	0.8039	0.0109	0.025	0.0997	20.5838	1.1146	0	0	98.0067	49.2	64.7359	0.646316
355	K5_L3C4	-0.0186	22.165	52.5505	0.6374	0.7731	-0.0217	-0.0208	0.1274	20.66	1.0338	-0.0147	0.0373	97.9846	51.24	64.6007	0.64541
355	K5_L3C4	0.0023	22.0689	52.9538	0.7979	0.7632	0.0434	0.0042	0.0692	21.0165	1.126	0.0058	0.0621	98.9133	53.3	64.1397	0.639701
355	K5_L3C4	0.0058	21.9659	53.0761	0.6611	0.7315	-0.0109	-0.0166	0.083	21.0273	1.1825	0.0192	0.028	98.7803	55.35	64.0633	0.637914
355	K5_L3C4	0.0269	21.9783	52.4945	0.5223	0.6908	0.0108	-0.0312	0.0885	21.122	1.1402	0.0026	-0.0342	98.077	57.4	64.0317	0.637506
355	K5_L3C4	0.0129	21.7263	52.3969	0.7624	0.728	0	0.0083	0.1107	21.1935	1.0865	0.0096	0.0342	98.0691	59.44	63.6408	0.634659
355	K5_L3C4	0.0188	21.6369	52.2168	0.7885	0.7008	-0.0596	0.0208	0.1272	21.4421	1.1485	0.0108	0.0093	98.1205	61.5	63.3223	0.630477
355	K5_L3C4	0.0012	21.6767	52.1423	0.9024	0.7243	-0.0271	0.0083	0.0663	21.3575	1.247	0.0223	-0.0031	98.1483	63.55	63.4217	0.630749
355	K5_L3C4	0.0211	21.6765	52.7525	0.7131	0.6888	-0.0163	-0.0042	0.2019	21.4491	1.0174	0.0057	-0.0093	98.5262	65.59	63.3735	0.632201
355	K5_L3C4	0.0117	21.6487	52.3185	0.6778	0.7234	-0.0433	0.0042	0.188	21.3271	1.1277	0.0134	-0.0093	98.0404	67.64	63.4246	0.632009
355	K5_L3C4	0.0235	21.6619	52.5234	0.626	0.6991	0.0054	-0.0208	0.1465	21.4266	1.2409	-0.0153	0.0466	98.3998	69.69	63.3675	0.629942
355	K5_L3C4	0.0105	21.6107	52.2425	0.6583	0.7405	-0.0054	-0.0166	0.0829	21.3165	1.1217	0.0025	-0.0031	97.7861	71.74	63.372	0.631773
355	K5_L3C4	0.0082	21.5479	52.732	0.6642	0.7074	0.0434	-0.0104	0.13	21.3873	1.1547	0.0274	0.0217	98.4243	73.79	63.2748	0.630017
355	K5_L3C4	0.0094	21.5986	52.3147	0.7825	0.6868	0.0108	0.0125	0.0525	21.6161	1.2461	0.0306	0.1148	98.4754	75.84	63.1193	0.627263
355	K5_L3C4	0.027	21.6586	51.9016	0.7633	0.6985	-0.0379	-0.0166	0.1408	21.654	1.2487	0.0172	-0.0341	98.1098	77.89	63.1292	0.627498
355	K5_L3C4	0.0246	21.501	52.3036	0.8303	0.7402	-0.0217	-0.0125	0.1382	21.4201	1.2588	-0.0159	0.0155	98.2324	79.94	63.1462	0.628083
355	K5_L3C4	0.0199	21.5973	51.9487	0.7188	0.7297	0.0325	0.0145	0.1299	21.399	1.1184	-0.0147	0	97.7088	81.99	63.2861	0.63081
355	K5_L3C4	0.0164	21.6045	52.2643	0.6847	0.718	-0.0108	0.0187	0.1381	21.601	1.237	0.0248	0.062	98.3695	84.04	63.0999	0.627576
355	K5_L3C4	0.0176	21.6461	52.3297	0.6748	0.7242	-0.0217	-0.027	0.0829	21.4063	1.2319	-0.0159	-0.031	98.1137	86.09	63.3383	0.630075
355	K5_L3C4	0.0059	21.6868	52.8021	0.5705	0.7449	0	0.0062	0.0939	21.6486	1.2314	0.0197	-0.0217	98.8101	88.14	63.1037	0.628036
355	K5_L3C4	0.0129	21.6674	52.0214	0.638	0.8321	-0.0379	-0.0125	0.0857	21.6132	1.1957	-0.0102	-0.0279	98.0664	90.19	63.0044	0.628558
355	K5_L3C4	-0.0059	21.5541	52.459	0.6387	0.8195	-0.0163	-0.0229	0.1161	21.4505	1.1603	0.0166	-0.0528	98.2148	92.24	63.0667	0.629373
355	K5_L3C4	0.0293	21.5566	52.0869	0.7073	0.861	-0.0379	0.0394	0.1769	21.4622	1.2196	-0.0153	0.0527	98.192	94.29	63.0023	0.628661
355	K5_L3C4	0.0211	21.4016	51.9872	0.9355	0.8336	0.0433	0.0228	0.1852	21.5069	1.0913	0.0351	0.0093	98.0729	96.34	62.824	0.627855
355	K5_L3C4	0.0482	21.4489	51.9387	0.9087	0.8091	-0.0271	-0.0042	0.163	21.6576	1.1923	-0.0115	-0.0093	98.1662	98.39	62.7524	0.625769
355	K5_L3C4	0.0388	21.483	52.1835	0.9347	0.8246	0.0054	0.027	0.1768	21.7065	1.2015	0.0019	-0.059	98.5837	100.44	62.7188	0.625545
355	K5_L3C4	0.0188	21.4934	52.1371	0.7119	0.8449	0.0379	0.0021	0.1354	21.4944	1.2524	0.0051	0	98.1334	102.49	62.9219	0.627303
355	K5_L3C4	0.0023	21.4749	52.0366	0.707	0.7825	-0.0108	0.0187	0.1244	21.1912	1.1458	0.0051	-0.0217	97.4885	104.54	63.3003	0.631354
355	K5_L3C4	0.0234	21.6008	52.7467	0.7372	0.8535	-0.0163	0.0083	0.1078	21.4847	1.1247	-0.0038	0.0031	98.6903	106.59	63.0367	0.629897
355	K5_L3C4	0.0176	21.7294	52.427	0.5693	0.8599	0.0271	0.0083	0.0885	21.378	1.3427	0.0223	-0.0031	98.4699	108.64	63.2766	0.630108
355	K5_L3C4	0.0351	21.7259	52.1467	0.6053	0.8175	-0.0542	0.0083	0.0581	21.3052	1.0086	0.0096	0.0714	97.7917	110.69	63.4045	0.634314
355	K5_L3C4	0.0363	21.7141	52.7206	0.655	0.7526	0.0217	-0.0145	0.1272	21.3875	1.2203	0.0102	-0.0528	98.6456	112.74	63.3928	0.63112
355	K5_L3C4	0.0317	21.7337	52.3188	0.6279	0.7799	0.0217	0.0021	0.141	21.4121	1.1873	-0.014	0.0248	98.281	114.79	63.352	0.63142
355	K5_L3C4	0.0246	21.6439	52.7318	0.6675	0.7956	0.0325	-0.0062	0.1023	21.2737	1.2057	-0.0179	0	98.4777	116.84	63.3787	0.631693
355	K5_L3C4	0.0035	21.7228	52.5682	0.6098	0.7195	-0.0542	0.0187	0.1465	21.4717	1.2113	0.0045	-0.0404	98.4765	118.89	63.3587	0.630441
355	K5_L3C4	0.0082	21.6908	52.3696	0.6747	0.7672	0.0217	0.0499	0.1189	21.3844	1.1308	-0.0089	-0.0062	98.2161	120.94	63.3517	0.631836
355	K5_L3C4	0.0188	21.6714	52.3404	0.7594	0.7186	0.0379	0.0021	0.1189	21.5383	1.0887	0.0013	0.0372	98.333	122.99	63.2359	0.630481
355	K5_L3C4	0.0305	21.65	52.7366	0.6499	0.7147	0.0379	-0.0145	0.177	21.3657	1.1487	0.03	-0.0466	98.541	125.04	63.3974	0.631404
355	K5_L3C4	-0.0141	21.6767	52.463	0.5805	0.7186	-0.0488	0	0.1382	21.4253	1.1516	0.0153	0.0124	98.1816	127.09	63.3588	0.631046
355	K5_L3C4	0.0234	21.691	53.0584	0.6171	0.7126	0.0108	-0.0353	0.166	21.4073	1.0865	-0.0306	0	98.7732	129.14	63.4008	0.632065
355	K5_L3C4	-0.0047	21.7263	52.6463	0.6017	0.7572	0.0108	0.0457	0.094	21.6114	1.2198	-0.0019	-0.0497	98.7132	131.19	63.1682	0.62896
355	K5_L3C4	0.0047	21.7056	52.6856	0.7071	0.6911	0.0163	-0.0083	0.0829	21.4198	1.3542	-0.0255	-0.0497	98.6672	133.24	63.432	0.629305
355	K5_L3C4	0.0164	21.6817	53.1467	0.6009	0.7777	0	0	0.0691	21.5569	1.1696	-0.0032	-0.0186	99.0191	135.29	63.1495	0.629559
355	K5_L3C4	0.0176	21.6148	52.4909	0.6502	0.7775	-0.0325	-0.0208	0.0525	21.4605	1.2857	-0.014	-0.0031	98.3495	137.34	63.1775	0.628621
355	K5_L3C4	-0.0117	21.5942	53.1087	0.6041	0.7077	-0.0705	0.0208	0.0996	21.4909	1.116	-0.0249	0.0528	98.7947	139.39	63.2166	0.629853
355	K5_L3C4	0.0235	21.5915	52.4694	0.5968	0.7096	0.0108	-0.0229	0.0746	21.6325	1.1213	0.0242	0.0186	98.2729	141.44	63.0645	0.628312
355	K5_L3C6	6.1569	3.0601	36.6945	16.0435	6.4641	0.0707	0.2363	0.075	3.8638	0.0368	-0.0163	0.0533	72.7549	0	30.9928	0.583035
355	K5_L3C6	6.8982	0.0614	57.8935	19.4176	5.5326	0.083	1.1796	0.1485	1.0012	0.0495	0.0097	0.0158	92.2906	2	1.33493	0.0942888
355	K5_L3C6	5.3567	0.0498	67.7091	17.2043	3.1635	0.2119	2.2077	0.2941	1.1746	0.0619	-0.0394	-0.0032	97.4335	4	1.66978	0.0669434
355	K5_L3C6	2.7806	0.0914	75.0084	11.0158	0.9402	0.0841	3.7755	0.3931	1.6371	0.0991	0.0477	0.0474	95.9203	6	5.42257	0.0857325
355	K5_L3C6	3.8981	5.967	60.6178	10.7171	2.6594	-0.0276	1.7011	0.3363	5.989	0.3619	0.0237	-0.0409	92.2715	8	53.0958	0.62597
355	K5_L3C6	0.0282	22.2522	51.5762	0.5943	0.7065	0.0487	-0.0062	0.1187	21.6926	1.362	-0.0095	-0.0341	98.3795	10.01	63.7063	0.632247
355	K5_L3C6	0.0023	21.9058	51.9127	0.5833	0.7489	0.0108	0.0083	0.0221	21.5979	1.1059	-0.0255	0.0589	97.9571	12.01	63.3842	0.632195
355	K5_L3C6	0.0353	21.8654	52.0122	0.5852	0.7235	0.0054	-0.0083	0.1298	21.9681	1.2308	-0.0127	-0.0093	98.5557	14.01	62.9957	0.626719
355	K5_L3C6	0.0282	21.7781	51.6341	0.6829	0.7902	-0.0216	0.0166	0.0745	21.9702	1.1439	0.0191	0.0248	98.1627	16.01	62.8133	0.626651
355	K5_L3C6	0.0082	21.7952	52.016	0.5542	0.758	0.0216	0.0042	0.1297	22.0626	1.2454	-0.028	0.0403	98.6355	18.01	62.7797	0.624867
355	K5_L3C6	0.0071	21.5844	52.2419	0.688	0.7318	-0.0162	-0.0166	0.1105	21.7796	1.2013	0.014	-0.0124	98.3584	20.01	62.8759	0.625904
355	K5_L3C6	0.0141	21.6011	52.3246	0.7139	0.7559	0.0217	0.0166	0.105	21.9191	1.0669	0.0013	0.0186	98.5589	22.01	62.7194	0.626051
355	K5_L3C6	0.0188	21.6715	52.0406	0.7556	0.771	0.0162	0.0042	0.0994	21.9757	1.1828	0.0121	-0.0837	98.5477	24.01	62.718	0.625048
355	K5_L3C6	0.0212	21.6918	52.6055	0.6799	0.7486	0.0271	-0.0145	0.1298	21.9676	1.2726	0.007	-0.0124	99.151	26.01	62.7774	0.624431
355	K5_L3C6	-0.0012	21.7375	52.2002	0.5848	0.7999	-0.0054	0.0062	0.0912	21.9037	1.1362	-0.0019	0.0124	98.4722	28.01	62.8247	0.626967
355	K5_L3C6	0.0035	21.7107	51.9328	0.5651	0.7881	-0.0054	0.0228	0.1326	21.757	1.1684	0.0197	-0.0279	98.1007	30.02	62.9612	0.627838
355	K5_L3C6	0.0283	21.7168	52.1763	0.6383	0.883	-0.0433	0.0145	0.185	22.0074	1.2636	0.0159	-0.0279	98.9291	32.02	62.5891	0.624392
355	K5_L3C6	0.0259	21.574	51.8245	0.6121	0.9211	0	0.0124	0.1297	22.0299	1.2239	-0.0114	0.0124	98.366	34.02	62.3623	0.623022
355	K5_L3C6	0.0236	21.3618	51.9249	1.1054	0.9815	0.0865	-0.0166	0.1685	22.105	1.2011	0.0064	0.0031	98.9677	36.02	61.9758	0.620172
355	K5_L3C6	0.0307	21.2751	51.6143	1.1937	0.9079	0.0487	0.0124	0.1629	22.1151	1.0903	-0.0032	-0.0868	98.4511	38.02	61.965	0.620247
355	K5_L3C6	0.0376	21.5053	52.0696	0.7888	0.9106	-0.0541	-0.0145	0.1685	21.8438	1.1951	0.0287	-0.0465	98.5478	40.02	62.49	0.624454
355	K5_L3C6	0.0352	21.7638	52.157	0.6201	0.8587	-0.0758	0.0395	0.0497	21.5807	1.2254	-0.0108	0.0714	98.4014	42.02	63.1062	0.629618
355	K5_L3C6	0.0164	21.7093	52.2182	0.7126	0.7778	-0.0271	0.0166	0.1326	21.7049	1.2074	-0.0006	-0.031	98.4959	44.02	63.0267	0.627952
355	K5_L3C6	0.0469	21.7272	52.7408	0.7899	0.799	-0.0054	0.0125	0.1161	21.7841	1.1331	-0.0178	0.0093	99.1589	46.02	62.9369	0.628104
355	K5_L3C6	0.1084	20.5628	53.0137	1.0423	0.7888	-0.0054	0.0311	0.138	22.2181	1.0516	-0.0146	-0.0031	98.9548	48.03	61.2099	0.611542
355	K5_L3C6	0.0258	21.551	52.1628	0.8613	0.7384	0.0271	0.0083	0.1713	21.4516	1.2047	0.0076	0.0155	98.2253	50.03	63.1699	0.628865
355	K5_L3C6	0.0211	21.4502	51.7857	1.0713	0.7328	0.0758	0.0083	0.0967	21.6878	1.0375	0.0006	-0.0093	97.9678	52.03	62.8235	0.627082
355	K5_L3C6	0.0024	21.4954	52.1599	0.9041	0.8197	0.0325	0.0125	0.058	21.8753	1.2608	0.007	-0.0155	98.6275	54.03	62.5659	0.623351
355	K5_L3C6	0.0294	21.7435	51.9912	0.6351	0.7711	-0.0325	0.0062	0.0939	21.6317	1.2753	-0.0204	-0.1334	98.1775	56.03	63.1474	0.628365
355	K5_L3C6	0.0141	21.8242	52.2469	0.6542	0.8345	0.0433	0.0083	0.1078	21.6372	1.148	-0.0115	-0.0248	98.5185	58.03	63.1445	0.630488
355	K5_L3C6	0.0188	21.7581	53.1364	0.6173	0.767	-0.0108	0.0145	0.0968	21.5589	1.2588	-0.0281	0.0248	99.2512	60.03	63.2434	0.629434
355	K5_L3C6	0.0082	21.7421	52.7067	0.5936	0.7612	0.0379	0.0145	0.0415	21.5365	1.3271	0.0421	-0.0683	98.8114	62.03	63.2571	0.628785
355	K5_L3C6	0.0012	21.6459	52.7958	0.5849	0.8046	-0.0217	-0.0145	0.1133	21.7059	1.151	0.0108	-0.0031	98.8133	64.03	62.9222	0.627841
355	K5_L3C6	0.007	21.7946	53.0866	0.6221	0.7718	-0.0217	-0.0083	0.1438	21.5389	1.1395	0.0153	-0.0341	99.1195	66.03	63.2966	0.631266
355	K5_L3C6	0.0316	21.7893	52.4971	0.6504	0.7904	0.0163	0.0021	0.094	21.4108	1.226	0.0153	0.0217	98.545	68.04	63.3987	0.631625
355	K5_L3C6	0.0211	21.7251	52.4647	0.6586	0.7921	0.0054	-0.0042	0.0912	21.5205	1.1336	0.0185	-0.0186	98.4308	70.04	63.2145	0.630773
355	K5_L3C6	0.0199	21.8117	52.2811	0.6232	0.7584	-0.0108	0.0021	-0.0249	21.3252	1.1516	0.0115	0.0528	98.0375	72.04	63.5538	0.633522
355	K5_L3C6	-0.007	21.7413	52.2247	0.9171	0.8223	-0.065	-0.0187	0.1658	21.5138	1.3031	0	-0.0683	98.688	74.04	63.1989	0.629257
355	K5_L3C6	-0.0035	21.662	52.0818	1.0718	0.7683	0	-0.0104	0.1022	21.6125	1.2345	0.0051	-0.0528	98.5381	76.04	63.0834	0.628105
355	K5_L3C6	0.0235	21.5391	52.2114	1.007	0.7212	0.065	-0.0104	0.127	21.6141	1.1862	-0.0019	0.0124	98.5068	78.04	63.0115	0.627259
355	K5_L3C6	0.0352	21.8404	52.2899	0.7209	0.7622	-0.0433	-0.0062	0.1521	21.397	1.1543	0.0038	-0.121	98.3557	80.04	63.5047	0.633059
355	K5_L3C6	0.0234	21.9668	52.5814	0.6426	0.7649	-0.0054	0.0166	0.094	21.2602	1.2534	-0.0051	0.031	98.6343	82.04	63.7765	0.634773
355	K5_L3C6	0.0164	22.1404	52.6634	0.5694	0.7099	0.0488	0.0166	0.1355	21.2203	1.1966	0.0045	-0.0341	98.7216	84.04	64.0728	0.637598
355	K5_L3C6	0.0363	22.1207	52.4821	0.5666	0.6864	0.0217	-0.0021	0.1134	21.1043	1.1634	0.016	-0.1645	98.3109	86.05	64.2047	0.638937
355	K5_L3C6	0.0269	22.077	52.8829	0.5059	0.6165	0.0108	-0.0125	0.0968	21.101	1.218	0.0236	-0.0248	98.5595	88.05	64.2565	0.637943
355	K5_L3C6	0.007	22.0556	52.9258	0.5201	0.6019	0.0434	-0.0187	0.0332	21.1248	1.1579	-0.0198	0.0031	98.4728	90.05	64.2289	0.638103
355	K5_L3C6	0.014	22.12	52.5164	0.5598	0.7349	-0.0379	-0.0021	0.1051	21.2074	1.1727	0.0179	0.0279	98.476	92.05	64.0317	0.637767
355	K5_L3C6	0.0257	22.077	53.0027	0.6373	0.6874	0.0163	-0.0146	0.047	21.3119	1.1608	-0.0089	-0.0186	98.9661	94.05	63.9415	0.636365
355	K5_L3C6	-0.0035	22.0972	52.8913	0.6148	0.6511	-0.0217	-0.0062	0.0526	21.275	1.1639	-0.0217	-0.0342	98.7459	96.05	64.0493	0.636924
355	K5_L3C6	-0.0082	22.0395	52.8425	0.6714	0.6468	0.0325	-0.0042	0.0719	21.2075	1.256	-0.0172	0.0435	98.8116	98.05	64.0653	0.636054
355	K5_L3C6	0.0035	21.9819	52.7859	0.5805	0.6501	-0.0217	0.0021	0.0194	21.1668	1.1902	-0.0153	-0.121	98.3803	100.05	64.0432	0.636556
355	K5_L3C6	0.0129	22.0697	52.31	0.5452	0.6703	-0.0271	0.0146	0.0304	21.1455	1.1008	-0.0159	0.0466	97.946	102.05	64.1301	0.638635
355	K5_L3C6	0.0012	21.8031	52.6929	0.7166	0.6229	-0.0217	0.0229	0.047	21.2028	1.0982	0.0057	-0.0373	98.2133	104.05	63.8537	0.635257
355	K5_L3C6	0.0234	21.9129	52.5413	0.7299	0.6426	-0.0163	-0.0042	0.1078	21.2487	1.2678	0.0077	0	98.4819	106.06	63.8951	0.634171
355	K5_L3C6	0.0164	21.8515	52.5639	0.6794	0.6458	0.0379	0.0104	0.105	21.3005	1.2199	0.0249	-0.0155	98.4557	108.06	63.7719	0.633486
355	K5_L3C6	0.0047	21.8483	52.2315	0.745	0.6056	0.0054	0.0062	0.0829	21.2186	1.1931	0.0306	0.0403	98.0123	110.06	63.9081	0.634578
355	K5_L3C6	0.0152	21.9765	52.1157	0.7229	0.6295	-0.0542	0	0.0856	21.4237	1.2971	-0.0045	0.0217	98.2879	112.06	63.7971	0.632745
355	K5_L3C6	0.0281	21.7895	52.384	0.7238	0.6077	0	-0.0062	0.0635	21.3465	1.3297	-0.0166	-0.0776	98.2728	114.06	63.7092	0.63121
355	K5_L3C6	0.027	21.8605	52.2358	0.7435	0.6883	-0.0162	0.0312	0.1105	21.5393	1.2014	-0.0178	-0.0217	98.4375	116.06	63.4767	0.631323
355	K5_L3C6	0.0187	21.7837	52.6183	0.722	0.6267	-0.0163	-0.0166	0.0525	21.3547	1.2351	-0.0223	-0.0559	98.4117	118.06	63.669	0.632048
355	K5_L3C6	0.0351	21.7231	52.7076	0.7473	0.6886	-0.0271	-0.0208	0.1382	21.3687	1.175	-0.0255	-0.0807	98.5835	120.06	63.5072	0.631882
355	K5_L3C6	0.0235	21.5947	52.7394	0.697	0.6253	-0.0325	-0.0249	0.0083	21.5283	1.4158	-0.0013	0.0744	98.7067	122.06	63.2879	0.626363
355	K5_L3C6	0.0434	21.661	52.6192	0.7333	0.6448	0.0054	-0.0042	0.0331	21.5363	1.3504	0.0121	-0.0993	98.639	124.07	63.3249	0.627674
355	K5_L3C6	0.0176	21.6691	52.3861	0.7139	0.6539	0.0163	-0.0374	0.0442	21.5876	1.1927	0.0083	-0.0124	98.2897	126.07	63.2682	0.628869
355	K5_L3C6	0.0317	21.5317	52.2811	0.7627	0.6803	0.0217	-0.0062	-0.0083	21.6676	1.1864	0.021	0.0745	98.2585	128.07	63.0023	0.626629
355	K5_L3C6	0.0164	21.5936	52.3214	0.7447	0.6587	-0.0108	-0.0332	0.0414	21.5183	1.1569	0.0045	0.0838	98.1397	130.07	63.2527	0.629138
355	K5_L3C6	-0.0211	21.6151	52.6292	0.7687	0.622	0.0162	-0.0062	0.069	21.6852	1.3233	-0.0382	-0.0248	98.7287	132.07	63.1515	0.62594
355	K5_L3C6	0.0341	21.6597	52.6846	0.707	0.6364	-0.0217	-0.0104	0.0856	21.6578	1.4246	0.0357	-0.0341	98.9254	134.07	63.2087	0.62566
355	K5_L3C6	0.0188	21.6266	52.6115	0.7363	0.6439	-0.0162	-0.0208	0.105	21.7318	1.2073	0.0274	0.0279	98.7364	136.07	63.0867	0.626786
355	K5_L3C6	0.0317	21.5615	51.9658	0.7504	0.6511	0.0162	-0.0166	0.0304	21.7644	1.2578	0.0242	0.0124	98.0661	138.07	62.9732	0.625228
355	K5_L3C6	0.0693	21.5707	52.2101	0.6687	0.6597	-0.0379	0.0021	0.0883	21.8508	1.1619	0.0089	0.0465	98.3372	140.07	62.8828	0.625437
355	K5_L3C6	0.02	21.4858	52.3306	0.6781	0.6325	0.0054	0.0166	0.0856	21.7677	1.225	-0.0134	0.0248	98.2722	142.07	62.9124	0.624708
355	K5_L3C6	0.0483	21.5079	51.7098	0.6889	0.6629	0.0217	0.0166	0.0304	21.8155	1.278	0.0203	0.0558	97.8562	144.08	62.8469	0.623917
355	K5_L3C6	0.0235	21.5282	52.1751	0.855	0.6841	0.0162	0.0187	0.0359	21.7119	1.2129	0.0261	-0.0124	98.2876	146.08	62.9478	0.625864
355	K5_L3C6	0.0423	21.5116	52.5006	0.8384	0.7183	0.0433	-0.0124	0.149	21.9503	1.3017	0.0127	-0.0279	99.0684	148.08	62.6396	0.622349
355	K5_L3C6	0.0564	21.3211	52.6002	0.9888	0.7117	-0.0217	-0.0478	0.1685	21.7329	1.2611	-0.0102	-0.0714	98.8408	150.08	62.6637	0.622884
355	K5_L3C6	0.0436	21.2475	52.0245	1.1306	0.7361	0.0379	0.0228	0.1076	22.0823	1.1467	-0.0178	-0.0155	98.5794	152.08	62.1916	0.619695
355	K5_L3C6	0.0236	21.129	51.2989	1.2672	0.714	-0.0054	0.0207	0.1379	22.1823	1.1969	0.0083	0.0403	98.019	154.08	61.9868	0.616848
355	K5_L3C7	2.7082	0.0728	77.6623	10.7541	0.7674	0.0056	3.8322	0.5445	1.7284	0.0155	0.009	-0.0032	98.1001	0	4.56721	0.0692524
355	K5_L3C7	1.4112	0.1428	76.5658	10.0406	0.5498	0.0786	4.0137	0.5768	1.6963	0.0527	-0.009	0.0063	95.1346	2.01	9.58667	0.127006
355	K5_L3C7	0.7542	20.7781	53.2243	2.002	1.2688	0.092	0.1536	0.1163	21.1491	1.2955	0.0198	-0.0403	100.854	4.02	61.9234	0.622496
355	K5_L3C7	0.0377	21.5693	51.9589	0.5813	0.8031	-0.0054	0.0643	0.0497	22.0425	1.2034	0.0019	0.0217	98.3337	6.03	62.4976	0.623053
355	K5_L3C7	-0.0071	21.4408	51.7034	0.5621	0.6844	0.0054	0.0228	0.1352	22.194	1.1496	-0.0261	0.0186	97.9164	8.03	62.358	0.620669
355	K5_L3C7	0.0153	21.4612	51.7313	0.6109	0.791	0	0.027	0.1352	22.0997	1.2572	0.0038	-0.0031	98.1327	10.04	62.3374	0.620745
355	K5_L3C7	0.0213	20.9024	52.0651	0.748	0.76	0.0108	0.0041	0.1184	22.9072	1.2165	0.0209	0	98.7748	12.05	60.941	0.606845
355	K5_L3C7	0.0071	21.3276	52.1653	0.5565	0.8049	0.0378	0.0228	0.0965	22.4758	1.2532	-0.0133	0.0124	98.76	14.06	61.7925	0.615544
355	K5_L3C7	0.0071	21.4191	51.9422	0.5256	0.7361	0.0325	-0.0125	0.1407	21.8312	1.2811	-0.0095	0.0124	97.9279	16.07	62.6375	0.622754
355	K5_L3C7	0	21.2698	52.5946	0.7568	0.9545	0.0162	0.0021	0.1353	22.2247	1.1945	0.0013	0.0093	99.159	18.08	61.7882	0.618014
355	K5_L3C7	0.0271	21.5401	52.5283	0.6992	0.7518	-0.0325	-0.0311	0.1104	22.0389	1.2039	-0.0051	-0.0217	98.8997	20.09	62.5364	0.622766
355	K5_L3C7	0.0224	21.5759	52.3622	0.6346	0.8188	-0.0054	-0.0104	0.1132	21.945	1.2428	-0.0115	-0.031	98.7148	22.1	62.5835	0.623707
355	K5_L3C7	0.0153	21.6246	52.1519	0.6526	0.7974	0	0.0353	0.1573	21.9928	1.2036	0.0617	0.0093	98.7019	24.1	62.6155	0.624154
355	K5_L3C7	0.0294	21.7343	52.351	0.5858	0.8356	-0.0162	-0.0021	0.1547	21.7498	1.2309	0.0223	0.0682	98.7619	26.11	62.9316	0.627522
355	K5_L3C7	-0.0012	21.6862	52.3006	0.6751	0.8983	-0.0108	-0.0208	0.1188	21.65	1.1808	0.0057	-0.0683	98.5155	28.12	62.8999	0.628538
355	K5_L3C7	0.0164	21.7436	52.7748	0.6733	0.7636	0.0271	0.0145	0.0912	21.7438	1.2854	-0.0217	0.0403	99.174	30.13	63.0422	0.627122
355	K5_L3C7	-0.0094	21.6201	52.0523	0.7406	0.7154	-0.0487	0.0021	0.1242	21.9248	1.1889	0.0076	-0.0403	98.376	32.14	62.7872	0.624944
355	K5_L3C7	-0.0282	21.8265	52.4175	0.6124	0.6784	0.0054	0.0083	0.0994	21.9565	1.2845	-0.0204	-0.0434	98.8889	34.15	63.0249	0.625872
355	K5_L3C7	0.0188	21.7299	52.3942	0.4606	0.8208	0	0.027	0.094	21.6672	1.2016	-0.0025	0.0528	98.4668	36.16	63.0309	0.628618
355	K5_L3C7	0.0047	21.8143	52.8006	0.5788	0.7969	0.0325	0.0021	0.0415	21.5587	1.1692	0.0019	-0.0341	98.8012	38.16	63.2641	0.630966
355	K5_L3C7	0.0305	21.8874	52.5239	0.6331	0.8531	-0.0108	-0.0457	0.1133	21.7096	1.2673	-0.0249	-0.0559	99.0182	40.17	63.1134	0.629195
355	K5_L3C7	0.0516	21.7402	52.6219	0.5626	0.8982	-0.0325	0	0.1686	21.5832	1.2169	0.014	-0.0124	98.8572	42.18	63.0264	0.629428
355	K5_L3C7	-0.0023	21.8334	52.641	0.6812	0.7984	0.0217	-0.0083	0.105	21.4779	1.2409	0.0261	-0.0186	98.8256	44.19	63.3657	0.631253
355	K5_L3C7	0.0305	21.8437	52.5409	0.7594	0.9385	0.0108	0.0145	0.1937	21.2741	1.2477	-0.0275	0.0621	98.9159	46.2	63.4017	0.633385
355	K5_L3C7	0.0316	21.6788	52.7904	0.8005	0.9819	0.0162	0.0166	0.1494	21.3371	1.1637	-0.0281	0.0745	99.0406	48.21	63.1033	0.631852
355	K5_L3C7	0.0211	21.618	52.5173	0.841	1.1065	0	0.0042	0.2325	21.3684	0.9701	0.0102	-0.0155	98.6892	50.22	62.8416	0.632906
355	K5_L3C7	-0.027	22.0369	52.4853	0.6595	0.8051	0.0163	-0.0249	0.0415	21.5126	1.1874	0.0332	0.0745	98.8522	52.23	63.5363	0.633609
355	K5_L3C7	0.0329	22.0592	52.9033	0.6186	0.7493	-0.0217	0.0062	0.1437	21.7817	1.2471	0.0191	0.0031	99.5642	54.23	63.3573	0.630494
355	K5_L3C7	0.0188	21.9579	53.0254	0.5205	0.7564	-0.0325	0.0042	0.0359	21.628	1.2854	-0.0102	-0.0559	99.2325	56.24	63.3985	0.630587
355	K5_L3C7	0.0059	21.8578	52.9457	0.6015	0.7301	-0.0434	0.0208	0.141	21.4701	1.1576	0.0102	0.0807	99.0214	58.25	63.4901	0.632458
355	K5_L3C7	0.041	21.9157	52.2682	0.6524	0.7636	0.0542	0.0104	0.0525	21.4379	1.1899	-0.0025	0	98.3857	60.26	63.5403	0.633067
355	K5_L3C7	0.0269	21.9057	53.1168	0.5623	0.7518	-0.0108	-0.0229	0.1383	21.4042	1.2561	0	-0.0466	99.1621	62.27	63.5802	0.632619
355	K5_L3C7	0.007	21.9927	52.9564	0.5578	0.719	0.038	0.0062	0.0858	21.4431	1.164	-0.0115	-0.0062	98.9701	64.28	63.6752	0.634097
355	K5_L3C7	0.0023	22.04	52.3997	0.4789	0.7358	0.0488	0.0187	0.1217	21.4475	1.1787	-0.007	-0.0279	98.4721	66.29	63.6981	0.634398
355	K5_L3C7	-0.0234	21.9536	52.6537	0.6102	0.7165	-0.0217	0.0187	0.1604	21.4238	1.1849	0.0013	0.0217	98.7449	68.3	63.6573	0.633665
355	K5_L3C7	0.0433	21.9219	52.7167	0.5936	0.7007	0.0108	-0.0249	0.1493	21.2887	1.2646	0.0185	0.1117	98.8199	70.3	63.7852	0.633888
355	K5_L3C7	0.0211	21.9768	53.1862	0.5659	0.7382	0.0108	0.0104	0.1051	21.5957	1.1668	-0.0472	-0.0279	99.3769	72.31	63.4757	0.632339
355	K5_L3C7	0.0082	22.0622	53.1315	0.6635	0.7168	0.0325	0.0042	0.1162	21.5122	1.0598	-0.0128	0.028	99.335	74.32	63.6797	0.635203
355	K5_L3C7	0.0293	21.9931	52.9571	0.5757	0.709	0.0217	-0.0042	0.1327	21.447	1.1546	0.0077	-0.0559	99.0279	76.33	63.6848	0.634159
355	K5_L3C7	-0.021	21.9115	52.9786	0.694	0.7605	0.0108	0.0062	0.083	21.256	1.1884	-0.0032	-0.0217	98.889	78.34	63.7285	0.63491
355	K5_L3C7	0.0515	22.0702	52.5317	0.6674	0.7549	0.0325	0.0395	0.1244	21.4482	1.3097	-0.021	-0.0341	99.0299	80.35	63.7037	0.633353
355	K5_L3C7	0.0281	21.9592	52.9965	0.6164	0.7124	0.0108	0.0208	0.0498	21.5303	1.1516	0.0147	0.0559	99.1464	82.36	63.5585	0.632979
355	K5_L3C7	-0.0012	21.9492	52.5929	0.5974	0.6445	0.0488	0.0062	0.1272	21.4388	1.2712	-0.0121	-0.0373	98.6761	84.36	63.7327	0.63257
355	K5_L3C7	0.0399	21.83	52.6882	0.5823	0.7031	-0.0379	0.0229	0.0829	21.5983	1.2168	-0.0166	-0.0062	98.7644	86.37	63.3638	0.630236
355	K5_L3C7	0.0187	21.8415	52.9778	0.65	0.6994	0.0054	-0.0021	0.0995	21.3908	1.1994	0.0006	0.031	98.9143	88.38	63.5958	0.632664
355	K5_L3C7	0.0141	21.7879	52.7462	0.6374	0.7212	-0.0054	-0.0145	0.0525	21.4482	1.1694	-0.0077	0.0776	98.6546	90.39	63.4503	0.631815
355	K5_L3C7	0.007	21.9742	52.8394	0.5695	0.7309	0.0163	-0.0208	0.0525	21.4918	1.2411	-0.0115	0.0776	99.0004	92.4	63.5896	0.632604
355	K5_L3C7	0.0317	21.9652	52.4329	0.6123	0.6837	-0.0054	0.0104	0.0746	21.5253	1.3003	0.0102	0.0559	98.7024	94.41	63.608	0.631555
355	K5_L3C7	0.0129	21.8378	53.0336	0.5965	0.6177	0.0325	-0.0291	0.0912	21.5875	1.2259	-0.0159	0.0186	99.0542	96.42	63.4964	0.630335
355	K5_L3C7	0.0164	21.9166	52.4843	0.5111	0.68	0.0325	-0.0042	0.0912	21.511	1.1008	-0.0147	-0.0031	98.3439	98.43	63.5764	0.633253
355	K5_L3C7	0.0281	21.8639	52.8781	0.6549	0.6379	0.0108	-0.0042	0.1161	21.3635	1.2023	0.0032	0	98.7589	100.43	63.7299	0.633153
355	K5_L3C7	-0.0094	21.8421	53.0495	0.7148	0.708	-0.0054	-0.0062	0.058	21.5079	1.2736	-0.0083	0.031	99.185	102.44	63.4636	0.6307
355	K5_L3C7	0.0258	21.8449	53.081	0.5898	0.6643	0.0217	-0.0187	0.1769	21.5623	1.2139	-0.0217	-0.0186	99.1806	104.45	63.4682	0.630792
355	K5_L3C7	0.0223	21.8608	52.9773	0.6031	0.6798	-0.0542	-0.0104	0.1437	21.5934	1.1782	0.0096	0.0248	99.093	106.46	63.4324	0.631013
355	K5_L3C7	0.0047	21.8256	53.0392	0.5783	0.7218	-0.0163	-0.0083	0.1465	21.4492	1.1605	-0.0204	0.0031	98.9289	108.47	63.4885	0.6323
355	K5_L3C7	0.0164	21.8243	52.9436	0.5479	0.7117	0	0.0021	0.1162	21.434	1.158	-0.0108	0.0062	98.7602	110.48	63.5163	0.632468
355	K5_L3C7	0.0304	21.8825	53.1817	0.6174	0.7341	0.0108	-0.0042	0.1383	21.3411	1.2144	0.0147	-0.0714	99.1654	112.49	63.6446	0.633455
355	K5_L3C7	0.0316	21.8767	53.0085	0.5948	0.7905	0.0054	-0.0021	0.0885	21.3696	1.2589	0.0038	0.059	99.0872	114.49	63.534	0.632637
355	K5_L3C7	0.0106	21.8992	52.8756	0.527	0.7355	-0.0271	0.0021	0.1078	21.4655	1.3185	0.0351	0.0714	99.0482	116.5	63.5315	0.631277
355	K5_L3C7	0.0047	21.7396	52.8386	0.6629	0.7469	-0.0217	0.0166	0.0885	21.5348	1.1813	-0.0083	0.0031	98.8169	118.51	63.2751	0.630286
355	K5_L3C7	0.0164	21.7217	53.0366	0.8021	0.7724	0.0433	0.0291	0.1935	21.7133	1.163	-0.0019	0.0279	99.5193	120.52	63.0384	0.628458
355	K5_L3C7	0.0211	21.6686	51.7592	0.8172	0.7135	0.0054	-0.0228	0.0442	21.6782	1.0106	-0.0115	-0.031	97.718	122.53	63.0951	0.629826
355	K5_L3C7	0.0082	21.6325	52.6962	0.754	0.7552	0.0108	0.0311	0.1768	21.7174	1.2341	0.0083	0.0682	99.0929	124.54	62.961	0.62672
355	K5_L3C7	0.0199	21.6387	52.796	0.7941	0.7671	0.0271	-0.0145	0.0553	21.5317	1.1872	0.0102	0.0031	98.8305	126.55	63.1433	0.629172
355	K5_L3C7	-0.0199	21.7107	53.1964	0.7113	0.7497	0.0162	-0.0104	0.1437	21.6577	1.3868	-0.0153	-0.0155	99.5726	128.56	63.1137	0.626599
355	K5_L3C7	-0.0047	21.7305	52.5424	0.6615	0.7152	0.065	0.0229	0.1493	21.4249	1.2019	-0.0006	0.0341	98.5475	130.56	63.4212	0.631102
355	K5_L3C7	0.0187	21.8445	53.5158	0.5228	0.7407	0.0488	0.0021	0.0747	21.387	1.2175	0.0377	0.059	99.4693	132.57	63.548	0.632547
355	K5_L3C7	0.0222	21.9558	53.2179	0.3333	0.7618	-0.0108	-0.0416	0.0332	21.4024	1.2086	-0.0083	0.0342	98.9694	134.58	63.6217	0.633662
355	K5_L3C7	0.0199	21.9729	53.5777	0.3558	0.7463	0.0271	0.0478	0.0249	21.4561	1.3069	0.0191	-0.0279	99.5546	136.59	63.6047	0.632274
355	K5_L3C7	0.0164	21.998	52.8146	0.3514	0.7646	0.0108	0.0145	0.1604	21.4523	1.2142	-0.0115	0.0093	98.8066	138.6	63.6109	0.633538
355	K5_L3C7	0.0082	22.069	53.2318	0.3301	0.7295	-0.0054	0.0187	0.0747	21.3368	1.14	0.0026	0.0435	98.9848	140.61	63.8513	0.636242
355	K5_L3C7	0.0117	21.9848	52.9991	0.4098	0.7025	-0.0434	0.0229	0.0359	21.4295	1.2379	0.007	0.0466	98.8876	142.62	63.7028	0.633386
355	K5_L3C7	0.0187	22.0138	52.9974	0.3497	0.6779	0.0054	-0.0083	0.1492	21.35	1.3867	0.058	-0.0714	99.007	144.63	63.8484	0.632965
355	K5_L3C7	0.0632	21.8863	53.1638	0.3478	0.6899	0.038	-0.0166	0.1217	21.209	1.2236	0	0.0559	98.799	146.63	63.8452	0.634761
355	K5_L3C7	0.0351	21.9995	53.1231	0.3463	0.7826	0.0217	0.0042	-0.0304	21.3493	1.1727	-0.0166	-0.0062	98.8344	148.64	63.6951	0.635042
355	K5_L3C7	0.0362	21.9586	53.5529	0.3783	0.7436	-0.0217	0.0125	0.1244	21.315	1.1962	-0.0032	-0.0465	99.3176	150.65	63.7394	0.634718
355	K5_L3C7	-0.0012	21.9032	53.1212	0.317	0.7204	-0.0054	0.0062	0.0166	21.4603	1.1636	-0.0363	-0.0031	98.7086	152.66	63.5611	0.632978
355	K5_L3C7	0.0023	21.9647	53.5273	0.3704	0.7173	0.0163	-0.0062	0.094	21.4414	1.0771	0.0026	-0.0931	99.2133	154.67	63.6497	0.634723
355	K5_L3C7	0.0164	21.9777	52.9737	0.3756	0.7427	-0.0271	-0.0125	0.0967	21.3786	1.2885	0.0121	0.0372	98.8993	156.68	63.6947	0.633308
355	K5_L3C7	-0.0023	21.8602	53.2734	0.3234	0.7535	-0.0163	-0.0021	0.047	21.3942	1.2829	-0.0006	-0.0528	98.9345	158.69	63.5401	0.63196
355	K5_L3C7	0.0058	21.883	53.2609	0.3005	0.7109	0.0596	-0.0042	0.0443	21.1826	1.2176	0.0064	-0.0435	98.6717	160.69	63.8412	0.635061
355	K5_L3C7	0.0047	21.8921	53.192	0.3071	0.7477	-0.0163	-0.0042	0.0581	21.4527	1.1275	-0.023	0.0217	98.8036	162.7	63.5211	0.633314
355	K5_L3C7	0.0187	21.964	53.3243	0.3786	0.7302	-0.0434	0.0208	0.083	21.3618	1.1399	-0.0077	0.0217	99.043	164.71	63.7143	0.634881
355	K5_L3C7	0.0352	21.8358	52.67	0.3759	0.7333	-0.0163	-0.0208	-0.0415	21.4358	1.2053	0.0115	-0.0217	98.3027	166.72	63.498	0.63208
355	K5_L3C7	0.0468	21.8162	52.4737	0.3674	0.771	-0.0433	-0.0249	0.1078	21.1066	1.2052	-0.0108	-0.0031	97.8947	168.73	63.7696	0.63527
355	K5_L3C7	0.0175	21.9175	52.8564	0.3837	0.7615	-0.0054	0.0125	0.0083	21.2436	1.2291	0.0102	-0.0186	98.4403	170.74	63.7464	0.634676
355	K5_L3C7	0.0281	21.9041	53.0118	0.3983	0.7588	-0.0217	0.0042	0.047	21.4332	1.2376	0.0287	0.0838	98.9354	172.75	63.5392	0.632497
355	K5_L3C7	0.014	22.0168	53.1888	0.3949	0.7703	0	0.0083	0.1687	21.4671	1.0889	0.0274	0.0093	99.1545	174.76	63.6079	0.634886
355	K5_L3C7	0.041	21.8617	53.0321	0.4209	0.7686	0.0054	-0.0104	0.0995	21.365	1.1931	0.067	0.0372	98.8915	176.76	63.5519	0.63321
355	K5_L3C7	0.0246	21.8188	52.977	0.3722	0.7355	0.0163	-0.0062	0.1161	21.4344	1.217	0.0376	-0.0155	98.7495	178.77	63.4785	0.631791
355	K5_L3C7	0.007	21.7601	53.5684	0.3828	0.7691	-0.0054	0.0146	0.0526	21.2084	1.1252	0.0045	0.0217	98.9143	180.78	63.6062	0.634458
355	K5_L3C7	0.0023	21.8307	53.1992	0.3023	0.7567	0.0054	-0.0145	0.094	21.3812	1.2323	-0.0089	-0.0093	98.8042	182.79	63.5181	0.632305
355	K5_L3C7	0.0164	21.8904	53.0834	0.3511	0.7186	0.0217	-0.0125	0.1465	21.4379	1.1664	-0.0261	-0.0341	98.8324	184.8	63.5732	0.633043
355	K5_L3C7	-0.0035	21.9046	53.1119	0.3625	0.7338	0.0542	0.0104	0.0995	21.5407	1.2646	-0.014	0.0279	99.1101	186.81	63.4618	0.631124
355	K5_L3C7	0.0422	21.9286	53.0185	0.3692	0.7169	-0.0271	0.0083	0.0636	21.522	1.2437	-0.03	-0.0217	98.9129	188.82	63.5288	0.631786
355	K5_L3C7	0.007	21.8474	52.4131	0.4263	0.7354	0.0271	0.0145	0.1106	21.3917	1.1572	-0.0421	0.0217	98.152	190.82	63.5532	0.633157
355	K5_L3C7	0.0585	21.9136	53.2734	0.3413	0.776	0.0271	0.0208	0.0083	21.4817	1.1662	-0.0064	-0.0528	99.0669	192.83	63.4764	0.632842
355	K5_L3C7	0.0375	21.9545	52.8139	0.4133	0.6864	0.0163	0.0021	0.0525	21.4675	1.1843	0.0287	-0.0248	98.657	194.84	63.6529	0.633233
355	K5_L3C7	0.0152	21.8499	53.1931	0.4435	0.7868	0.0054	0.0146	-0.0138	21.3926	1.137	-0.0198	0.0093	98.8474	196.85	63.4867	0.633385
355	K5_L3C7	0.0257	21.8836	53.2829	0.3866	0.7196	-0.0217	0.0166	0.0415	21.3072	1.2114	-0.0019	-0.0031	98.8751	198.86	63.7003	0.633847
355	K5_L3C7	-0.014	21.8976	52.516	0.436	0.6907	0.0108	-0.027	0.036	21.1525	1.1608	-0.0038	0.0466	97.9469	200.87	63.9151	0.636123
355	K5_L3C7	0.0387	21.8751	53.0784	0.3316	0.7273	-0.0433	0.0125	0.0636	21.4921	1.2644	0.014	0.031	98.9286	202.88	63.4894	0.631309
355	K5_L3C7	0.0445	21.9764	53.3419	0.4583	0.7382	0.0108	0.0021	0.0304	21.5079	1.1397	-0.0179	0.0248	99.2751	204.89	63.5657	0.633513
355	K5_L3C7	-0.0035	21.8656	53.3373	0.4241	0.6895	0.0054	0.0083	0.0885	21.4622	1.3424	-0.0013	-0.0466	99.2233	206.89	63.5604	0.630706
355	K5_L3C7	0.014	21.8379	53.4113	0.4091	0.6791	0.0488	-0.0332	0.0221	21.3799	1.2796	-0.0006	-0.0062	99.0819	208.9	63.6303	0.631904
355	K5_L3C7	0.0316	21.8981	53.3377	0.3511	0.692	0.0108	0.0145	0.0304	21.4705	1.2439	-0.0057	-0.0435	99.0806	210.91	63.5828	0.631986
355	K5_L3C7	0.0234	21.8801	52.9917	0.3918	0.7717	-0.0217	0.0021	0.0885	21.472	1.2438	0.0293	-0.031	98.8944	212.92	63.4567	0.631781
355	K5_L3C7	-0.0082	21.8372	52.9354	0.4323	0.6994	0	-0.0104	0.0608	21.3757	1.1158	0.0051	-0.0155	98.4618	214.93	63.6069	0.633646
355	K5_L3C7	-0.0023	21.8952	53.3188	0.4159	0.7623	-0.0054	-0.0083	0.0304	21.3667	1.3039	-0.014	-0.0093	99.0932	216.94	63.594	0.632396
355	K5_L3C7	0.0035	21.9091	53.0267	0.4616	0.6767	-0.065	0.0145	0	21.4095	1.2768	0.0134	0.0062	98.798	218.95	63.6781	0.632386
355	K5_L3C7	0.0363	21.7905	52.5718	0.4113	0.7009	0.0542	0.0457	0.0166	21.2218	1.2409	0.0121	-0.0155	98.102	220.96	63.7158	0.63343
355	K5_L3C7	-0.0047	21.9149	53.441	0.4417	0.7155	0.0434	0.0374	0.1715	21.3491	1.1606	0.0274	-0.0745	99.3024	222.96	63.6953	0.634277
355	K5_L3C7	0.0222	21.8556	53.309	0.4159	0.739	0.0217	-0.0312	0.1245	21.4541	1.0799	-0.0013	-0.09	99.0219	224.97	63.4925	0.633408
355	K5_L3C7	0.0129	21.9312	52.9176	0.3854	0.73	-0.0163	0.0104	0.0387	21.3731	1.1902	0.0338	0.0403	98.6637	226.98	63.6683	0.633894
355	K5_L3C7	0.0094	21.8803	52.8867	0.3788	0.7429	0.0054	0.0062	0.0581	21.2969	1.2023	0.0376	0.0248	98.5294	228.99	63.6765	0.634013
355	K5_L3C7	0.0035	21.819	52.7703	0.4373	0.7663	-0.0217	-0.0125	0.0332	21.333	1.1754	0.021	0.0279	98.387	231	63.5429	0.63327
355	K5_L3C7	0.0293	21.8601	52.721	0.4358	0.7443	-0.0054	0.0021	0.0138	21.4484	1.181	-0.0051	-0.0093	98.4358	233.01	63.4961	0.632462
355	K5_L3C7	0.0023	21.8033	52.8064	0.4033	0.713	0.0108	0.0021	0.0415	21.4835	1.1544	0.0057	0.0279	98.4543	235.02	63.441	0.631773
355	K5_L3C7	0.0117	21.8413	53.2279	0.3396	0.7315	-0.0488	0.0042	0.0608	21.5327	1.1962	0.0089	-0.0031	98.9548	237.02	63.406	0.63124
355	K5_L3C7	0.0223	21.8449	53.1383	0.4469	0.7534	0.0325	-0.0042	0.1382	21.448	1.2292	-0.007	-0.0341	99.0537	239.03	63.4684	0.631803
355	K5_L3C23	3.6057	0.0603	74.2297	11.823	1.2491	0.0784	3.4282	0.4951	1.435	0.062	0.0055	0.098	96.57	0	3.42014	0.066959
355	K5_L3C23	1.2686	0.0669	76.5547	12.7361	1.0712	0.0676	2.813	0.4779	1.4723	0.0496	-0.0021	0.0569	96.635	2.03	4.02346	0.072636
355	K5_L3C23	1.2809	0.0851	78.4069	10.916	0.5171	0.1124	3.9326	0.5188	1.6439	0.031	0.0145	0.0221	97.4813	4.07	6.17127	0.0830301
355	K5_L3C23	2.5406	0.1176	75.8958	11.2242	0.7463	0.0841	3.8383	0.5882	1.6434	0.0651	-0.0228	0.0126	96.7562	6.1	7.4623	0.10924
355	K5_L3C23	5.6443	4.3515	54.448	17.5669	6.6391	0.6575	0.5223	0.1416	4.1539	0.2183	-0.0177	-0.0314	94.3434	8.13	37.9927	0.639377
355	K5_L3C23	-0.0204	19.9014	51.4724	0.7076	0.7239	0.0324	0.029	0.0357	24.1709	1.1955	0.0177	-0.0464	98.2863	10.17	58.5656	0.582929
355	K5_L3C23	0.0012	18.4715	50.8555	0.9341	0.6141	-0.0108	-0.0021	0.1394	25.8204	1.1765	-0.0144	0.0371	98.0498	12.2	55.3073	0.549338
355	K5_L3C23	0.011	17.9091	50.3618	1.1288	0.6062	-0.0429	0.0474	0.1037	26.5924	1.1245	0.0119	0.0339	97.9307	14.24	53.841	0.535141
355	K5_L3C23	-0.0228	19.8371	52.423	0.568	0.7797	0.0539	-0.0207	0.1264	23.996	1.2113	-0.0259	-0.0186	98.9955	16.27	58.5872	0.583669
355	K5_L3C23	0.0295	21.2357	52.2084	0.6536	0.7744	0	-0.0021	0.102	22.0909	1.3338	-0.0165	-0.0806	98.4284	18.3	62.1197	0.617562
355	K5_L3C23	-0.0024	21.3269	52.4746	0.6355	0.7168	0.0379	0.0187	0.1352	22.1506	1.1587	-0.0108	-0.0341	98.6548	20.34	62.2349	0.61976
355	K5_L3C23	0.0353	21.4499	52.544	0.6761	0.7773	0	0.0083	0.1987	21.9382	1.2723	-0.0312	-0.031	98.9001	22.37	62.5075	0.622098
355	K5_L3C23	0.0189	21.3256	52.6028	0.6824	0.7749	0.0325	0.0249	0.1187	22.1743	1.1737	0.0038	0.0186	98.951	24.4	62.1336	0.619352
355	K5_L3C23	0.0059	21.2771	52.536	0.7068	0.7071	-0.0541	0.0228	0.1076	22.1337	1.2152	-0.0242	0.0403	98.7526	26.44	62.2098	0.618801
355	K5_L3C23	0.033	21.4264	52.2549	0.5741	0.8331	-0.0108	-0.0083	0.0994	22.035	1.0994	0.0083	0.0093	98.3728	28.47	62.3102	0.622634
355	K5_L3C23	0.0353	21.4279	52.8936	0.5847	0.7929	0	0.0083	0.1436	22.0075	1.0251	0.0229	0.0403	98.9821	30.51	62.3923	0.623695
355	K5_L3C23	0.0235	21.4137	52.5372	0.7004	0.7515	-0.0108	0.0311	0.2181	22.0503	1.2156	0.0146	0.0031	98.9591	32.54	62.3872	0.621147
355	K5_L3C23	0.0071	21.5191	51.8423	0.6968	0.7602	0.0108	0.0187	0.1352	21.8889	1.2897	-0.0324	-0.0806	98.1686	34.57	62.6557	0.623175
355	K5_L3C23	0.0494	21.5387	52.1112	0.62	0.7388	0.0162	0.0042	0.0939	21.9028	1.159	0.0108	-0.0372	98.2448	36.61	62.6908	0.62459
355	K5_L3C23	0.0141	21.3442	52.2009	0.6972	0.7475	-0.0108	0.0166	0.1159	21.8612	1.2542	0	0.0124	98.2642	38.64	62.5097	0.621903
355	K5_L3C23	0.0165	21.536	52.6275	0.5577	0.739	0.0217	0.0104	0.1353	21.9049	1.1445	-0.0376	0.0403	98.7338	40.67	62.6855	0.624689
355	K5_L3C23	0.0177	21.4637	52.5885	0.6549	0.8982	0.0649	0.0021	0.0883	21.9926	1.2422	0.0248	0.0682	99.106	42.71	62.3094	0.622007
355	K5_L3C23	0.0247	21.4721	52.3555	0.7771	0.7075	-0.0162	-0.0042	0.0331	21.8819	1.2279	-0.0172	-0.0062	98.4798	44.74	62.6809	0.623367
355	K5_L3C23	0.0282	21.3249	52.2291	0.7554	0.7501	-0.0108	0.0021	0.1049	21.7094	1.2396	-0.0153	0.0217	98.1654	46.78	62.6414	0.623389
355	K5_L3C23	0.047	21.5722	52.3754	0.6068	0.742	0.0433	0.0125	0.0718	21.9417	1.2306	0.0185	0.0124	98.6741	48.81	62.6832	0.623825
355	K5_L3C23	-0.0012	21.4724	52.3197	0.6553	0.7782	0.0325	-0.0145	0.1933	21.9129	1.2158	-0.0255	-0.0527	98.5801	50.84	62.5567	0.62318
355	K5_L3C23	-0.0106	21.4099	52.9589	0.6462	0.7679	-0.0217	-0.0062	0.1187	21.8924	1.2396	0.0032	0.0558	99.0926	52.88	62.5229	0.622459
355	K5_L3C23	0.0024	21.3488	52.3441	0.7199	0.7934	0.0108	0.0125	0.1601	21.8796	1.2662	-0.0146	0.0651	98.6029	54.91	62.4355	0.621643
355	K5_L3C23	0.0271	21.3999	52.1862	0.7331	0.7618	0.0433	0.0207	0.1076	21.8635	1.3253	-0.0045	0.0651	98.5337	56.94	62.5496	0.621762
355	K5_L3C23	0.0141	21.5618	52.746	0.7019	0.8517	-0.0162	-0.027	0.0911	21.884	1.2634	-0.0293	0.0744	99.1884	58.98	62.5874	0.62396
355	K5_L3C23	0.0306	21.4225	52.3138	0.6565	0.9193	0.0974	0.0166	0.1215	21.8513	1.2156	0.0083	0.0651	98.7184	61.01	62.3805	0.623262
355	K5_L3C23	0.0283	21.387	52.6165	0.6759	0.8312	0.0162	0.0104	0.138	22.0971	1.2213	0.0274	-0.0217	99.0492	63.05	62.2064	0.620323
355	K5_L3C23	0.0129	21.3389	52.5447	0.661	0.8654	-0.0541	-0.0021	0.0635	21.8681	1.2544	-0.0127	-0.0279	98.6089	65.08	62.3421	0.621773
355	K5_L3C23	0.0211	21.4327	52.8574	0.6153	0.8682	-0.0271	0.0291	0.0884	21.9054	1.0551	0.0178	0.0155	98.906	67.11	62.4033	0.624479
355	K5_L3C23	0.0412	21.522	52.4899	0.6438	0.8088	0.0216	0.0083	0.0662	21.9622	1.293	-0.0064	-0.0155	98.8569	69.15	62.5204	0.622432
355	K5_L3C23	-0.0024	21.4321	52.3356	0.7118	0.7856	0.0216	0.0249	0.0994	21.9016	1.1144	-0.0242	-0.0155	98.427	71.18	62.5145	0.623898
355	K5_L3C23	0.0082	21.5637	52.3528	0.6425	0.7175	0.0487	0.0083	0.1104	21.9995	1.245	0.021	-0.0651	98.7177	73.21	62.647	0.623001
355	K5_L3C23	0.0106	21.4977	53.0058	0.5943	0.7738	-0.0108	0.0125	0.1216	21.8944	1.1089	-0.0064	0.0124	99.032	75.25	62.609	0.624745
355	K5_L3C23	0.0541	21.5334	52.2059	0.6734	0.6984	0.0162	-0.0042	0.1822	21.7601	1.2664	0.0159	0.0496	98.4557	77.28	62.8848	0.624877
355	K5_L3C23	0.0059	21.5033	52.5381	0.6761	0.7563	0.0595	0.0062	0.1573	21.9821	1.2721	0.0146	0.0093	98.9809	79.32	62.5484	0.62224
355	K5_L3C23	0.0223	21.4654	52.3922	0.6746	0.8308	0.0541	-0.0228	0.1408	22.0053	1.0698	0.0248	-0.0124	98.6801	81.35	62.3861	0.623667
355	K5_L3C23	0.02	21.4135	52.9922	0.6962	0.7052	-0.0054	-0.0166	0.0856	21.8108	1.1476	0.028	0.0031	98.9023	83.38	62.6931	0.624278
355	K5_L3C23	0.0165	21.3213	52.4953	0.6904	0.6646	0.0325	0.0166	0.0718	21.8906	1.138	0.0051	-0.0713	98.3427	85.42	62.5635	0.62255
355	K5_L3C23	0.0341	21.4192	52.5455	0.7019	0.6897	-0.0217	0.0042	0.0193	21.8688	1.177	0.007	-0.0062	98.4667	87.45	62.6601	0.623445
355	K5_L3C23	0.0071	21.5305	52.4947	0.7511	0.7253	0.0108	0.0145	0.069	21.8592	1.207	0.0248	-0.0558	98.6941	89.48	62.7443	0.62445
355	K5_L3C23	-0.0024	21.5083	52.6095	0.6567	0.7025	-0.0054	-0.0311	0.1463	21.8878	1.2575	0.0121	-0.0496	98.7806	91.52	62.7208	0.623399
355	K5_L3C23	0.0188	21.3839	52.6635	0.6468	0.7613	0.0217	0.0083	0.0994	22.1344	1.132	-0.0134	-0.0558	98.8701	93.55	62.256	0.620825
355	K5_L3C23	0.0447	21.3453	52.5743	0.6857	0.7549	-0.0054	0.0332	0.1491	21.9323	1.1799	-0.0267	0.0806	98.7799	95.58	62.4282	0.621957
355	K5_L3C23	0.0259	21.5183	52.3623	0.6587	0.7769	0.0379	0.0353	0.0773	22.0575	1.0847	0.0095	-0.0093	98.6443	97.62	62.461	0.623562
355	K5_L3C23	0.0435	21.5863	52.8016	0.6225	0.6875	0.0054	0.0062	0.1519	21.8885	1.1328	-0.0439	-0.0124	98.9262	99.65	62.8244	0.625523
355	K5_L3C23	0.0258	21.6271	53.2853	0.5752	0.6595	-0.0217	-0.0021	0.0414	21.8358	1.2106	0.0287	-0.0621	99.2894	101.69	62.9595	0.6257
355	K5_L3C23	0.0294	21.5455	52.9981	0.6029	0.6689	-0.0054	-0.0021	0.1436	21.8789	1.24	0.007	0.0527	99.167	103.72	62.8146	0.624074
355	K5_L3C23	0.0282	21.5043	52.4536	0.6145	0.6898	-0.0325	0.0125	0.0442	21.8053	1.1981	-0.0051	0.0186	98.3691	105.75	62.818	0.624804
355	K5_L3C23	0.0071	21.4615	52.7154	0.6046	0.6301	0	-0.0208	0.0801	21.974	1.1772	0.0153	0.0124	98.6777	107.79	62.6766	0.622838
355	K5_L3C23	0.0094	21.4554	52.848	0.5818	0.6834	-0.0325	-0.0125	0.0304	21.812	1.2845	-0.0153	0.0838	98.7886	109.82	62.7664	0.623312
355	K5_L3C23	-0.0117	21.6054	53.3493	0.5537	0.6681	-0.0325	0.054	0.1491	21.9029	1.2311	-0.0299	0.0372	99.5509	111.85	62.8558	0.624573
355	K5_L3C23	0.0129	21.5253	52.9391	0.5023	0.6781	0.065	-0.0125	0.047	21.8311	1.1986	0.0013	0.0745	98.8753	113.89	62.8297	0.624766
355	K5_L3C23	0.0223	21.6407	52.8369	0.4568	0.6749	0.065	0.0021	0.047	21.7023	1.181	0.0153	0	98.6444	115.92	63.0913	0.627511
355	K5_L3C23	0.0223	21.5987	52.8641	0.4243	0.6565	0.0271	0.0145	0.0442	21.6286	1.1184	-0.0057	0.0621	98.4609	117.96	63.1466	0.62846
355	K5_L3C23	0.0211	21.7136	53.6247	0.437	0.6898	0.038	-0.0229	0.0249	21.7127	1.1665	-0.0083	0.0838	99.512	119.99	63.1392	0.628341
355	K5_L3C23	0.0317	21.6523	53.0602	0.361	0.6788	-0.0054	-0.0145	0.1133	21.7603	1.2345	0.0096	-0.0528	98.9016	122.02	63.0388	0.626494
355	K5_L3C23	0.0469	21.7973	53.0458	0.4148	0.6613	-0.0325	0.0145	0.0221	21.728	1.2018	0.007	0.0621	99.0016	124.06	63.2505	0.628719
355	K5_L3C23	0	21.7402	52.9905	0.4442	0.6357	0.0054	-0.0125	0.0912	21.7186	1.2324	0.0102	-0.0062	98.8684	126.09	63.233	0.627887
355	K5_L3C23	0.0012	21.7156	52.9723	0.4554	0.625	-0.038	-0.0146	0.0525	21.7009	1.226	-0.0198	0.0248	98.7739	128.12	63.2391	0.627868
355	K5_L3C23	-0.0129	21.6698	53.5001	0.4321	0.6153	-0.0054	0.0374	0.0746	21.619	1.3873	0.0019	-0.0062	99.3375	130.16	63.2877	0.626546
355	K5_L3C23	0.0012	21.6587	53.2581	0.5149	0.6566	-0.0325	-0.0187	0.1687	21.728	1.0113	0.0108	-0.031	99.0081	132.19	63.1083	0.629201
355	K5_L3C23	-0.0047	21.592	53.5039	0.523	0.651	0.0108	0.0561	0.1106	21.7943	1.2651	0.0134	-0.0217	99.5202	134.23	62.9755	0.62518
355	K5_L3C23	-0.0035	21.5527	53.0144	0.5104	0.6538	-0.0379	-0.0208	0.0995	21.8227	1.2792	0.0248	-0.0341	98.9575	136.26	62.9001	0.62432
355	K5_L3C23	0.0165	21.6478	52.3091	0.5032	0.7051	-0.0108	0.0042	0.0995	21.6636	1.2084	0.0045	-0.0217	98.1618	138.29	63.0989	0.6277
355	K5_L3C23	0.007	21.6338	53.2723	0.6045	0.6122	0	0.0021	0.0995	21.8329	1.1904	-0.0166	0.0062	99.261	140.33	63.032	0.62601
355	K5_L3C23	0.0188	21.5834	53.0203	0.5316	0.6387	0.0379	-0.0166	0.1023	21.9148	1.0857	0.0051	-0.0062	98.9386	142.36	62.8585	0.625709
355	K5_L3C23	0.0141	21.6358	53.0433	0.517	0.681	-0.0163	-0.0146	0.1079	21.6078	1.2176	0.0006	-0.0559	98.8251	144.39	63.1756	0.628045
355	K5_L3C23	0.0305	21.6774	52.7725	0.4881	0.6107	0.0434	-0.0042	0.0912	21.6342	1.098	-0.028	0.0342	98.4802	146.43	63.2862	0.629464
355	K5_L3C23	-0.0129	21.6184	52.8838	0.5577	0.6935	-0.0325	-0.0208	0.0829	21.7823	1.1362	0.0013	0.0652	98.8213	148.46	62.9603	0.626917
355	K5_L3C23	0.0329	21.6513	53.2508	0.4943	0.6527	0.0759	-0.0042	0.0802	21.8046	1.2504	0.0025	-0.0217	99.2957	150.49	63.0266	0.625869
355	K5_L3C23	0.0177	21.755	52.5626	0.4967	0.6626	0.0217	0.0042	0.0801	21.9548	1.2194	0.014	-0.0435	98.7887	152.53	62.9709	0.625785
355	K5_L3C23	-0.0082	21.5996	52.9712	0.3937	0.6383	0.0108	-0.0062	0.0553	21.6737	1.1669	-0.0147	0.0342	98.5437	154.56	63.125	0.627505
355	K5_L3C23	0.0117	21.5514	52.4002	0.5202	0.9103	0.1787	-0.0125	0.166	21.5383	1.0565	0.0057	0	98.3392	156.6	62.8531	0.629523
355	K5_L3C23	0.0247	21.7683	52.5125	0.4332	0.6629	0.0108	0.0042	0.0912	21.6086	1.3335	-0.0115	-0.0124	98.4498	158.63	63.3407	0.628266
355	K5_L3C23	0.0117	21.8172	52.931	0.4346	0.6206	0.038	-0.0062	0.0968	21.671	1.1462	-0.0274	0.0124	98.7795	160.66	63.3843	0.630087
355	K5_L3C23	0.0223	21.8279	53.217	0.4002	0.6663	-0.0325	-0.0146	0.1465	21.6613	1.2591	-0.0083	-0.0776	99.2006	162.7	63.3452	0.629135
355	K5_L3C23	-0.0294	21.7724	52.8325	0.4216	0.6758	-0.0054	-0.0021	0.0884	21.7723	1.2707	0.0325	-0.0279	98.8663	164.73	63.1592	0.627293
355	K5_L3C23	0.007	21.7971	52.8016	0.4491	0.6603	0.0326	-0.0166	0.0636	21.4062	1.0897	0.0115	0.0404	98.3592	166.77	63.5847	0.633177
355	K5_L3C23	0.0188	21.7878	53.1892	0.4686	0.6053	0.0597	0.0062	0.0691	21.752	1.188	0.0223	-0.0342	99.167	168.8	63.2896	0.628515
355	K5_L3C23	0.0071	21.9114	52.9274	0.3942	0.6348	0.0108	0.0021	0.0857	21.7892	1.274	0.0204	0.0621	99.1192	170.83	63.3438	0.628575
355	K5_L3C23	0.0399	21.9062	52.7838	0.5081	0.6544	-0.0217	-0.0062	0.0913	21.6732	1.1492	0.044	0.0062	98.8563	172.87	63.4318	0.630982
355	K5_L3C23	0.0188	21.7479	52.6845	0.495	0.635	-0.0054	-0.0021	0.0359	21.6345	1.2653	-0.0102	-0.0155	98.517	174.9	63.3291	0.628486
355	K5_L3C23	0.0411	21.6962	52.9977	0.498	0.5995	0.0326	-0.0042	0.0525	21.6799	1.1578	0	-0.1056	98.7554	176.93	63.2739	0.628578
355	K5_L3C23	0.0211	21.7231	52.7274	0.4785	0.6551	0.0054	-0.0312	0.0968	21.7049	1.119	0.0287	0.0186	98.5786	178.97	63.2032	0.629014
355	K5_L3C23	-0.0047	21.7229	53.354	0.4861	0.6443	0.0434	-0.0042	0.0609	21.5809	1.1317	0.0389	-0.0342	99.0631	181	63.3455	0.630149
355	K5_L3C23	0.0153	21.7597	53.2427	0.5515	0.6537	-0.0163	0.0166	0.0747	21.7473	1.2267	0.0261	-0.0652	99.3144	183.03	63.2005	0.627863
355	K5_L3C23	0.0259	21.7533	52.4327	0.5328	0.6662	0.0217	0.0229	0.1271	21.8619	1.1604	0.0089	-0.0621	98.6137	185.07	63.0595	0.627312
355	K5_L3C23	-0.007	21.6987	53.3533	0.4748	0.6618	0.0271	-0.0229	0.1079	21.5761	1.3255	-0.014	-0.0652	99.2252	187.1	63.3014	0.627931
355	K5_L3C23	0.0317	21.7453	53.2362	0.4799	0.585	-0.0271	0.0312	0.1742	21.7674	1.2029	-0.0236	-0.0404	99.2538	189.14	63.2552	0.627749
355	K5_L3C23	0.0176	21.7785	53.4403	0.4814	0.6674	0.0163	0.0208	0.0802	21.8681	1.1968	-0.0026	0.0217	99.589	191.17	63.0785	0.627146
355	K5_L3C23	0.0153	21.7657	53.1946	0.5092	0.6262	0.0108	-0.0291	0.0691	21.7799	1.2028	0.0198	-0.0124	99.1933	193.2	63.2096	0.627842
355	K5_L3C23	0.0258	21.758	53.5263	0.5038	0.6023	0.0706	0.0146	0.047	21.612	1.1437	-0.0032	0.0031	99.3071	195.24	63.4065	0.630082
355	K5_L3C23	0.0152	21.8137	53.1617	0.4523	0.6847	0	0.0062	0.0803	21.5874	1.1347	-0.0064	0.0093	98.9455	197.27	63.3821	0.631023
355	K5_L3C23	0.0106	21.7387	53.2769	0.4945	0.6044	-0.0271	0.0083	0.0332	21.716	1.2356	-0.0153	0.0466	99.1647	199.3	63.2755	0.627864
355	K5_L3C23	-0.0071	21.8106	53.0382	0.4477	0.6229	-0.0054	0.0208	0.0553	21.6897	1.3818	0.0096	-0.0373	99.0765	201.34	63.3549	0.6274
355	K5_L3C23	0.0399	21.7648	52.9956	0.4947	0.6318	0.0163	0.0437	0.0857	21.7438	1.1878	0.0261	0.0248	99.0551	203.37	63.2385	0.628354
355	K5_L3C23	-0.0176	21.814	53.1705	0.4329	0.6588	-0.0054	-0.0499	0.1301	21.7594	1.072	-0.0223	0.0031	99.0407	205.41	63.2393	0.629917
355	K5_L3C23	-0.0023	21.8039	53.0549	0.5011	0.6909	-0.0217	-0.0146	0.1024	21.5581	1.2597	0.0051	-0.0435	98.976	207.44	63.3937	0.629924
355	K5_L3C23	0.0106	21.7787	53.0081	0.5369	0.6602	0.0163	-0.0083	0.0996	21.5531	1.2719	0.0396	-0.0031	98.9749	209.47	63.4128	0.629579
355	K5_L3C23	0.0035	21.8232	53.4231	0.4928	0.6868	-0.0108	-0.0146	0.0968	21.6943	1.2715	0.023	0.0683	99.5833	211.51	63.2792	0.628621
355	K5_L3C23	0.0305	21.8217	52.8296	0.4899	0.6828	-0.0325	0.0062	0.0858	21.573	1.1493	-0.0032	-0.0373	98.6689	213.54	63.408	0.631104
355	K5_L3C23	-0.0023	21.8381	52.7614	0.4981	0.6691	0.0054	0.0083	0.0415	21.4944	1.2209	0.0211	0.028	98.5863	215.57	63.5249	0.631342
355	K5_L3C23	0.0059	21.7447	52.8285	0.4638	0.6458	-0.0163	0.0187	0.0166	21.5065	1.1343	-0.0293	0.0528	98.4175	217.61	63.444	0.631119
355	K5_L3C23	0	21.7369	52.5697	0.5793	0.687	0.038	-0.0125	0	21.3699	1.1554	-0.0402	-0.0311	98.1363	219.64	63.5228	0.632222
355	K5_L3C23	0.0141	21.726	52.8774	0.5711	0.7221	0.0108	-0.0291	0.094	21.7779	1.2504	-0.0191	0.0031	99.047	221.68	63.0429	0.626946
355	K5_L3C23	-0.0047	21.8447	52.6468	0.5278	0.6351	-0.0217	0.025	0.0221	21.6879	1.2505	-0.0134	-0.0217	98.6398	223.71	63.3769	0.629132
355	K5_L3C23	0.0059	21.9257	53.0053	0.5879	0.7005	-0.0163	-0.0083	0.0443	21.7864	1.3254	-0.0236	0.0155	99.3968	225.74	63.2755	0.62823
355	K5_L3C23	0.0211	21.7721	53.1629	0.5352	0.6619	0.0326	-0.0083	0.0996	21.6263	1.1853	-0.0108	-0.0435	99.097	227.78	63.3277	0.629656
355	K5_L3C23	0.0258	21.755	52.8033	0.615	0.6729	0	-0.0208	0.1355	21.6285	1.1609	0.0312	0.028	98.8561	229.81	63.2927	0.629703
355	K5_L3C23	-0.0012	21.8262	53.305	0.5888	0.6931	-0.0054	-0.0062	0.13	21.7958	1.2147	-0.0147	-0.0497	99.5536	231.84	63.1698	0.628207
355	K5_L3C23	0.0188	21.8197	52.7625	0.5472	0.6818	-0.038	0.0187	-0.0138	21.8375	1.1576	-0.0204	0.0621	98.9059	233.88	63.1349	0.628301
355	K5_L3C23	-0.0035	21.836	53.1126	0.4881	0.6416	0.0542	-0.0146	-0.0111	21.616	1.2985	0.0045	-0.0186	99.0515	235.91	63.4333	0.629276
355	K5_L3C23	0.0364	21.8621	53.0812	0.5031	0.7061	0.0651	0.0021	0.0277	21.9125	1.1908	-0.0134	-0.0342	99.3871	237.94	63.0716	0.627654
355	K5_L3C23	0.0059	21.7991	52.598	0.5474	0.6543	0	0.0208	0.1133	21.7696	1.34	0.014	0.0155	98.8779	239.98	63.2189	0.626897
355	K5_L3C23	0.034	21.7118	52.941	0.563	0.6329	0.0326	0.0166	0.083	21.6055	1.1346	0.0019	0.0435	98.8005	242.01	63.3233	0.629748
355	K5_L4C15	6.0607	0.1075	58.7757	25.3079	8.3492	0.0165	0.5836	0.0671	0.9039	0.0186	-0.0249	-0.0442	100.191	0	1.625	0.171959
355	K5_L4C15	1.9636	1.448	73.0824	10.6246	1.3515	0.4974	3.4274	0.5467	2.8085	0.0681	-0.0269	0.0126	95.8309	2.07	36.2461	0.472856
355	K5_L4C15	1.577	3.8409	71.6798	8.3593	0.8231	0.0611	3.1726	0.4111	7.1591	0.4234	-0.0386	-0.0535	97.5075	4.14	45.4615	0.474322
355	K5_L4C15	2.6419	0.0799	76.7886	13.4176	1.5269	0.0168	3.2629	0.5221	1.4199	0.0403	-0.0353	-0.0063	99.7172	6.21	4.04787	0.0888418
355	K5_L4C15	2.5086	0.9047	76.5098	10.8729	1.0515	0.0954	3.5205	0.4866	1.8457	0.1302	-0.0214	0.0316	97.9575	8.27	33.5588	0.449183
355	K5_L4C15	0.8075	9.2602	62.9574	6.0053	3.6709	2.1658	2.2232	0.478	9.3759	0.4522	-0.0141	-0.0125	97.3965	10.34	53.9689	0.626666
355	K5_L4C15	0.03	22.1723	54.3417	0.747	1.3649	0.087	0.0501	0.2089	19.4961	0.8908	-0.0129	0.0623	99.4509	12.41	65.0396	0.659584
355	K5_L4C15	0.0135	24.9215	54.5151	0.6137	1.4945	-0.0273	0.0105	0.0729	16.8273	0.7477	0.0156	0.0125	99.2448	14.48	70.3289	0.716417
355	K5_L4C15	0.009	25.2781	54.27	0.6728	1.6243	0	0.0524	0.1909	16.5011	0.6124	-0.0091	-0.0875	99.2109	16.55	70.802	0.724653
355	K5_L4C15	0.0023	23.8191	53.8005	0.4431	1.6597	-0.0109	-0.0021	0.1818	17.9024	0.6588	-0.0227	0.0437	98.5113	18.62	67.9476	0.695722
355	K5_L4C15	0.0163	22.3183	53.4195	0.2945	0.8096	0.0326	0.0062	0.0776	20.9933	1.2253	-0.0115	0.0497	99.243	20.69	64.36	0.641486
355	K5_L4C15	0.0176	21.6843	52.7622	0.2702	0.7529	-0.0054	0.0042	0.0277	21.5667	1.2774	0.0198	-0.0062	98.383	22.75	63.175	0.628369
355	K5_L4C15	0.0248	21.4003	52.4583	0.6183	0.8434	0.0433	-0.0312	0.1409	22.0209	1.2764	-0.0134	-0.0341	98.8265	24.82	62.2825	0.620675
355	K5_L4C15	0.0271	21.3977	53.1656	0.6498	0.7931	0.0054	0.027	0.094	21.9056	1.2711	-0.0096	-0.0093	99.3363	26.89	62.463	0.621867
355	K5_L4C15	0.0436	21.5471	52.4559	0.5405	0.8196	-0.0163	-0.0332	0.0636	21.9356	1.1574	0.0172	-0.0248	98.5804	28.96	62.5607	0.624365
355	K5_L4C15	0.0235	21.6214	53.0462	0.3692	0.7391	0.0163	0.027	0.0802	21.7566	1.1577	-0.014	-0.0497	98.8372	31.03	62.9299	0.626989
355	K5_L4C15	0.0318	21.5927	52.9253	0.4522	0.7226	0.0596	0	0.0746	21.9107	1.2199	0.0312	0.0155	99.0361	33.1	62.7625	0.624471
355	K5_L4C15	0.0236	21.5791	52.652	0.5388	0.7087	0.0108	-0.0187	0.0718	21.9811	1.3121	-0.0121	0.0186	98.8966	35.17	62.694	0.622669
355	K5_L4C15	0.0177	21.4433	52.6036	0.6151	0.774	-0.0054	-0.0083	0.1575	22.118	1.2166	0.0357	0.0497	99.031	37.23	62.3213	0.620779
355	K5_L4C15	0.0306	21.4858	52.8602	0.644	0.7839	0	0.0042	0.105	22.1209	1.1034	-0.0153	-0.0341	99.1381	39.3	62.352	0.622373
355	K5_L4C15	0.0271	21.43	52.1142	0.6742	0.728	-0.0108	0.0104	0.1575	22.0119	1.1837	0.0166	-0.0528	98.3535	41.37	62.4749	0.622042
355	K5_L4C15	0.0412	21.4219	52.659	0.6425	0.7258	-0.0325	-0.0249	0.1133	22.0427	1.199	0.0197	0.0155	98.8807	43.44	62.4375	0.621484
355	K5_L4C15	0.0448	21.5268	52.5131	0.6285	0.724	-0.0054	-0.0166	0.1077	22.0109	1.3419	0.0064	0.0559	98.9599	45.51	62.5868	0.621494
355	K5_L4C15	0.0071	21.461	52.6991	0.6882	0.7282	-0.0217	-0.0166	0.0884	22.093	1.2825	0	-0.0155	99.0476	47.58	62.4258	0.620553
355	K5_L4C15	0.0506	21.5147	53.0028	0.5904	0.6977	0	-0.0208	0.1161	22.0539	1.1096	0.035	-0.0435	99.1708	49.65	62.5641	0.623303
355	K5_L4C15	0.0518	21.4699	53.1337	0.634	0.827	0	0.0021	0.0415	22.1497	1.1097	-0.021	0.0062	99.4255	51.71	62.2494	0.621843
355	K5_L4C15	0.0471	21.499	52.6474	0.6425	0.8242	0.0163	0.0042	0.1023	21.9322	1.2288	0.0319	-0.0155	98.9757	53.78	62.5058	0.623142
355	K5_L4C15	0.0448	21.3952	52.5641	0.724	0.7465	-0.0054	0.0062	0.105	22.1634	1.2672	-0.0134	-0.0124	99.0165	55.85	62.2582	0.619277
355	K5_L4C15	0.0459	21.4118	52.3618	0.6527	0.8674	-0.0271	0.0104	0.0332	21.8981	1.2262	0	-0.0373	98.5076	57.92	62.3889	0.62256
355	K5_L4C15	0.0577	21.3248	52.8929	0.6028	0.804	-0.0271	0.0395	0.1409	22.0129	1.1988	-0.0019	0.0155	99.0898	59.99	62.259	0.620719
355	K5_L4C15	0.0766	21.3759	52.5224	0.5825	0.8564	-0.0325	0.0083	0.0663	21.9937	1.2704	-0.0274	-0.0373	98.7526	62.06	62.2664	0.620743
355	K5_L4C15	0.0707	21.4415	52.4348	0.4997	0.8654	0	0.0062	0.0304	21.8849	1.2826	-0.0363	0.0062	98.5224	64.13	62.4375	0.62244
355	K5_L4C15	0.0895	21.4976	52.4721	0.5485	0.8186	0.0217	0.0062	0.058	21.9052	1.2109	0.0172	0.0186	98.6641	66.19	62.5392	0.623584
355	K5_L4C15	0.0659	21.506	52.7949	0.5385	0.8243	-0.0054	-0.0021	0.0553	21.9016	1.2676	-0.0261	-0.0435	98.9541	68.26	62.5445	0.62313
355	K5_L4C15	0.073	21.6665	52.6918	0.4478	0.8138	0.0108	-0.0021	0.094	21.9966	1.1364	-0.0019	0.0466	98.9771	70.33	62.6356	0.625258
355	K5_L4C15	0.0271	21.6231	52.6129	0.4315	0.8394	0.0162	-0.0125	0.1188	21.9484	1.2555	0.0229	-0.059	98.8959	72.4	62.6043	0.624055
355	K5_L4C15	0.0565	21.6248	52.2702	0.4642	0.8473	0.0054	-0.0021	0.1962	21.926	1.1808	-0.007	-0.0279	98.5714	74.47	62.6187	0.625066
355	K5_L4C15	0.0646	21.6058	53.4616	0.4565	0.8332	0.0217	-0.0187	0.1161	21.856	1.3006	-0.0121	0.0279	99.7441	76.54	62.6878	0.62434
355	K5_L4C15	0.0459	21.5675	52.9411	0.4815	0.8389	-0.0542	-0.0083	0.0387	21.9504	1.2827	-0.0198	0.0062	99.1528	78.61	62.5427	0.623152
355	K5_L4C15	0.0458	21.5342	52.8279	0.4763	0.8056	0.038	-0.0125	0.047	21.5617	1.0865	0.007	-0.0124	98.43	80.68	62.9486	0.628782
355	K5_L4C15	0.0764	21.6619	53.099	0.4749	0.8543	0.0325	0.0042	0.1327	21.9164	1.2083	0.0102	0.0279	99.4987	82.74	62.6594	0.625283
355	K5_L4C15	0.0518	21.6454	52.5055	0.4332	0.7742	-0.0433	0	0.0746	21.7967	1.2557	0.021	0.0683	98.6264	84.81	62.8685	0.625831
355	K5_L4C15	0.1012	21.6981	52.535	0.4462	0.8451	0	0.0249	0.0691	21.7908	1.342	-0.0032	-0.0652	98.8524	86.88	62.8384	0.625575
355	K5_L4C15	0.0706	21.7044	52.7383	0.4445	0.8751	0.0108	-0.0062	0.0608	21.9613	1.151	0.0102	-0.1117	99.0271	88.95	62.6326	0.625875
355	K5_L4C15	0.0541	21.6051	53.1318	0.4878	0.8581	-0.0217	-0.0187	0.0884	21.9765	1.2766	0.0236	-0.0031	99.502	91.02	62.5319	0.62336
355	K5_L4C15	0.0506	21.5664	53.0399	0.5316	0.8672	-0.0054	0.0145	0.0581	21.8069	1.2737	-0.0096	-0.0559	99.2089	93.09	62.6508	0.624686
355	K5_L4C15	0.0388	21.6775	52.953	0.5531	0.8703	-0.0054	0.0083	0.1742	21.8521	1.2501	-0.0274	0.0435	99.4208	95.15	62.7208	0.625674
355	K5_L4C15	0.0706	21.5659	52.6334	0.4394	0.8107	0.0054	-0.0166	0.0885	21.8315	1.2022	-0.0115	0.0155	98.6631	97.22	62.6991	0.625166
355	K5_L4C15	0.094	21.6053	52.866	0.4521	0.8656	0.0163	0.0208	0.0774	21.7807	1.2023	0.0274	0	99.0078	99.29	62.7218	0.626109
355	K5_L4C15	0.1539	21.6994	53.0417	0.4686	0.8051	-0.0488	0.0104	0.0194	21.8768	1.1932	0.0019	0.0621	99.3326	101.36	62.8044	0.626244
355	K5_L4C15	0.0423	21.6318	52.2537	0.4447	0.8415	-0.0217	0.0291	0.0442	21.7104	1.2024	-0.0076	0.0311	98.2313	103.43	62.8539	0.627111
355	K5_L4C15	0.1116	21.5376	53.2049	0.4454	0.8447	-0.0379	0	0.0691	21.7573	1.2262	-0.0089	0.0528	99.2497	105.5	62.6997	0.625366
355	K5_L4C15	0.0905	21.6916	52.9455	0.4589	0.8358	-0.0325	-0.0166	0.0885	21.8359	1.2084	-0.0198	-0.0342	99.1551	107.57	62.7976	0.626419
355	K5_L4C15	0.0552	21.6802	53.1438	0.483	0.7892	0.0434	0.0312	0.0996	21.844	1.2146	-0.0332	0.0062	99.3904	109.64	62.838	0.62615
355	K5_L4C15	0.1104	21.5873	53.1569	0.5121	0.8193	0.0054	0.0374	0.036	21.7691	1.182	-0.0019	-0.0062	99.2159	111.7	62.7748	0.626242
355	K5_L4C15	0.1117	21.559	52.6944	0.5141	0.8736	0	0.0166	0.1493	21.8577	1.1486	-0.0019	-0.0186	98.9251	113.77	62.5825	0.625377
355	K5_L4C15	0.0624	21.5746	52.5312	0.5501	0.8388	0.0163	0.0083	0.0857	21.781	1.3125	-0.0147	0.0217	98.7826	115.84	62.7233	0.624639
355	K5_L4C15	0.0952	21.5875	52.7207	0.6084	0.8915	0.0433	-0.0062	0.0387	21.7519	1.3277	0.0089	-0.0186	99.0738	117.91	62.698	0.624918
355	K5_L4C15	0.1071	21.6584	52.4685	0.6137	0.8456	0.0217	0.0145	0.0967	21.8895	1.3507	-0.0408	-0.0155	99.0663	119.98	62.6943	0.624059
355	K5_L4C15	0.0812	21.5428	52.8817	0.6034	0.7555	0.0379	-0.0021	0.0967	22.0289	1.2018	0.0146	0.031	99.2756	122.05	62.5447	0.622918
355	K5_L4C15	0.0846	21.5625	53.0223	0.6259	0.8478	0.0163	0.0187	0.0442	21.8882	1.2797	0	0.0124	99.4026	124.12	62.589	0.623758
355	K5_L4C15	0.0647	21.6706	53.0084	0.5664	0.7743	-0.0108	-0.0042	0.1078	21.9853	1.2887	-0.0249	0.0559	99.5221	126.18	62.703	0.623859
355	K5_L4C15	0.093	21.6844	52.9329	0.5046	0.7638	0	-0.0291	0.1105	22.0811	1.1722	0.0102	0.0093	99.3618	128.25	62.6342	0.624232
355	K5_L4C15	0.0717	21.6379	52.4864	0.4607	0.8134	0.0271	0.0187	0	21.7456	1.1248	0.0382	0.0186	98.4431	130.32	62.8613	0.62762
355	K5_L4C15	0.0646	21.6022	53.1288	0.4405	0.7627	-0.0271	0.0395	0.0802	21.6827	1.1372	0.0083	0.0124	98.9591	132.39	62.9541	0.627749
355	K5_L4C15	0.0683	21.6627	52.6604	0.5519	0.7805	0.0217	0.0291	0.0663	21.9869	1.3599	0.0191	-0.0093	99.2068	134.46	62.6847	0.623031
[truncated: 2,948 more rows]

## Sheet: All opx profiles Andesites
500 µm	ZM														ZS																				Normal								No timescales modelled						355 µm
															Reverse
																																				No timescales modelled
																No timescales modelled
[truncated: 14 more columns]

## Sheet: Melted opx Microlites And
Names	SiO2	TiO2	Al2O3	Cr2O3	FeO	MnO	MgO	CaO	Na2O	K2O	P2O5	NiO	Total	Nature	Mineral	Localisation	En	Mg#
K5_P23_microlite_haut	53.6562	0.289725	1.21101	0.0101605	19.1077	0.847346	23.0145	1.74479	0.0395354	0.0367187	0.0423522	0	100	Andesite	opx	microlite	65.7786	0.672639
K5_P1_microlite1	54.9137	0.20646	1.41933	0	16.2166	0.470133	24.3566	2.18057	0.0390322	0.00934719	0.115042	0.0732367	100	Andesite	opx	microlite	69.548	0.722295
K5_P1_microlite2	53.9455	0.294117	1.31888	0.00300017	17.3856	0.699041	23.6079	2.44354	0.0618036	0.0363021	0.0976057	0.106806	100	Andesite	opx	microlite	67.2257	0.699321
K5_P1_microlite3	57.0006	0.223789	2.63379	0.0121889	18.3256	0.742843	18.7113	1.62201	0.279175	0.352992	0.0955613	0	99.9999	Andesite	opx	microlite	62.045	0.636138
K5_P2_microlite	54.1514	0.16849	1.18003	0.031781	16.5842	0.598693	25.2453	1.9797	0.0303685	0.00221962	0	0.0279471	100	Andesite	opx	microlite	70.1808	0.723587
K5_P5_Opx1	52.1496	0.24449	3.32134	0.0222447	17.9101	0.540749	24.1678	1.58534	0.0582407	0	0	0	99.9999	Andesite	opx	Resorbed core	68.3581	0.700059
K5_P5_Opx2	51.5337	0.375978	3.64962	0.0317175	18.3522	0.769979	23.6557	1.58104	0.0364499	0.0136939	0	0	100	Andesite	opx	Resorbed core	67.4191	0.687893
K5_P5_Opx4	52.6609	0.404527	2.54217	0	16.766	0.61119	24.7564	2.23618	0.00859834	0	0	0.0140608	100	Andesite	opx	Resorbed core	69.2116	0.717385
K5_carto_opxb1	38.1857	0.0879565	0.0157101	0.0166107	24.0511	0.457194	36.9245	0.133486	0.0114073	0.00450289	0.0136087	0.098163	100	Andesite	opx	Resorbed core	73.0991	0.728627
K5_carto_microliteopx	53.7116	0.242883	1.73013	0	16.613	0.664385	25.1072	1.78853	0.03623	0.00688167	0.0993794	0	100	Andesite	opx	microlite	70.3038	0.721379
K9_355_opxL7C17_c	38.3925	0	0.0210245	0.0116349	24.2389	0.415183	36.7522	0.15452	0	0	0.0138802	0	99.9999	Andesite	opx	Resorbed core	72.8327	0.72653
K9_355_opxL7C17_r	52.8639	0.383396	2.58653	0.00354527	17.0935	0.494616	24.3521	2.18986	0.0325152	0	0	0	99.9999	Andesite	opx	reactionnal rim	68.5678	0.711582
K9_355_opxL8C15_c	53.7002	0.0933741	0.682286	0	21.1586	1.03715	22.5586	0.717711	0.0241626	0	0.0280532	0	100	Andesite	opx	Resorbed core	64.5559	0.644206
K9_355_opxL11C13_c	38.6191	0	0.0105846	0	23.9003	0.435409	36.8741	0.131743	0	0	0	0.0287738	100	Andesite	opx	Resorbed core	73.1967	0.729755
K5_P27_opx_r	52.6255	0.4038	2.1944	0.0024	16.4528	0.5634	25.081	2.1857	0.0229	0	0	0.0284	99.5603	Andesite	opx	rim	69.8989	0.724235
K5_P27_opx_r2	53.183	0.5392	2.5921	0	14.5903	0.7033	20.9433	7.6791	0.0948	0.0902	0	0.1141	100.529	Andesite	opx	rim	60.4467	0.70927
K5_P25_opx_c1	52.6431	0.1237	0.7353	0	22.2659	1.3713	22.2758	0.6671	0.0138	0	0.1618	0.0344	100.292	Andesite	opx	Resorbed core	63.2004	0.626676
K5_P25_opx_c2	52.7691	0.0513	0.5058	0	22.0447	1.1069	22.3049	0.666	0.0159	0.0068	0.042	0	99.5134	Andesite	opx	Resorbed core	63.4554	0.631854
K5_P25_opx_c3	53.1	0.1611	0.527	0.0199	21.7039	1.1991	22.3096	0.7968	0.0218	0.011	0.1214	0	99.9716	Andesite	opx	Resorbed core	63.6362	0.634397
K5_P25_opx_couropx_2	53.1453	0.4373	2.0384	0.006	16.3526	0.5594	25.3996	1.8445	0.0349	0	0.1399	0.1569	100.115	Andesite	opx	rim	70.753	0.727967
K5_P2_opx_rim2	52.4856	0.5469	1.9229	0.0041	16.7404	0.8346	18.9863	8.2339	0.1157	0.0196	0	0.0553	99.9453	Andesite	opx	rim	55.361	0.658064

## Sheet: Unzoned opx Dacites
Sample	Crystal	Area	Na2O	MgO	SiO2	Al2O3	CaO	P2O5	K2O	TiO2	FeO	MnO	Cr2O3	NiO	Total	En (%)	Mg#
K6 355	K6_L1C4	Unzoned	0.0165	22.2229	51.2381	0.695233	0.7356	0.0113	0.000766667	0.0586333	22.1808	1.2151	0.0242667	-0.0216667	98.4452	63.1423	0.628535
K6 355	K6_L2C19	Unzoned	0.00855	21.9438	52.3678	0.5049	0.68275	-0.0017	0.01185	0.097725	22.1331	1.3112	0.00735	-0.0222	99.1003	62.9571	0.625009
K6 355	K6_L3C22	Unzoned	0.0127	22.3062	51.6811	0.682975	0.6788	0.02205	0.006775	0.12075	22.1597	1.249	-0.008075	0.041	98.9792	63.3214	0.629252
K6 355	K6_L4C1	Unzoned	0.0111	21.9669	52.423	0.717475	0.703275	0.020325	0.011825	0.141625	22.4183	1.21938	0.0266	0.011975	99.6911	62.6737	0.623406
K6 355	K6_L4C4	Unzoned	0.000625	22.1624	52.631	0.655925	0.82195	0.08795	-0.000575	0.09325	21.9591	1.24008	0.006675	0.02135	99.7231	63.1922	0.629859
K6 355	K6_L4C23	Unzoned	0.019925	22.2843	52.8275	0.55345	0.821325	0.010175	0.0124	0.074575	22.2632	1.24118	0.016475	0.04695	100.174	63.0115	0.628077
K6 355	K6_L4C24	Unzoned	0.016175	21.9394	52.075	0.6972	0.721475	0.03555	0.011275	0.096175	22.4652	1.1645	0.023075	-0.010225	99.2726	62.5698	0.623153
K6 355	K6_L5C1	Unzoned	0.011075	22.0156	53.0469	0.549175	0.738475	0	-0.013525	0.07385	22.1295	1.2429	-0.012625	0.022175	99.8716	62.9644	0.626502
K6 355	K6_L5C2	Unzoned	0.03455	21.9082	52.4066	0.706275	0.8011	0.0051	0.023075	0.118525	22.1787	1.24835	0.01365	-0.01365	99.4636	62.7196	0.624814
K6 355	K6_L5C17	Unzoned	0.0087	22.2353	51.3364	0.5731	0.68795	0.010725	-0.0046	0.0846	22.3335	1.2477	0.000325	0.005375	98.5572	63.0609	0.626786
K6 355	K6_L2C7	Unzoned	0.0197	22.2577	52.9573	0.5519	0.7123	0.021225	0.005	0.10565	22.6123	1.21225	0.00145	-0.0236	100.474	62.7741	0.624627
K6 355	K6_L2C14	Unzoned	0.0087	22.1815	53.1064	0.64755	0.713	0.00425	-0.001675	0.081775	22.4249	1.25943	0.007475	-0.04125	100.455	62.8812	0.625215
K6 355	K6_L2C18	Unzoned	0.01095	22.1203	53.3118	0.6102	0.692625	0.008475	0.0078	0.1025	22.6387	1.26105	0.007825	-0.039625	100.809	62.6285	0.622427
K6 355	K6_L3C24	Unzoned	0.0184667	22.0412	53.0334	0.6806	0.671567	-0.017	0.00963333	0.0894333	22.5415	1.20843	0.00433333	0.00223333	100.315	62.6681	0.623067
K6 355	K6_L4C22	Unzoned	0.01285	22.1437	52.8348	0.8248	0.746625	0.0226	0.013925	0.1245	22.2627	1.22713	-0.0154	-0.030275	100.234	62.9613	0.626753
K6 355	K6_L4C23	Unzoned	0.0151	22.1671	52.6986	0.6437	0.825225	-0.0028	0.0061	0.1133	22.5865	1.25448	0.002175	-0.02435	100.359	62.5587	0.623482
K6 355	K6_L6C6	Unzoned	0.029175	22.1901	53.17	0.73205	0.700625	0.0028	0.01165	0.126575	22.4563	1.18732	0.00235	0.02775	100.654	62.8765	0.625733
K6 355	K6_L6C7	Unzoned	0.01125	22.0151	52.9616	0.7226	0.7165	-0.004225	0	0.11225	22.5956	1.34113	0.011	-0.0076	100.532	62.5304	0.620948
K6 500	K6_L1C1	Unzoned	0.01715	21.9634	53.1478	0.6972	0.718875	0.020575	0.0167	0.124925	22.449	1.20933	0.0042	0.0277	100.41	62.6181	0.623153
K6 500	K6_L1C5	Unzoned	0.014375	22.0016	52.682	0.746725	0.66325	0.0055	0.016725	0.089425	22.384	1.24478	-0.023925	-0.00485	99.8765	62.7932	0.623827
K6 500	K6_L2C4	Unzoned	0.031425	22.0722	52.5331	0.760825	0.712875	-0.023275	0.005375	0.064225	22.3841	1.264	0.0016	-0.0106	99.852	62.8067	0.62442
K6 500	K6_L2C13	Unzoned	0.022	22.2625	52.4008	0.696333	0.731933	0.0182	-0.0114667	0.1386	22.4193	1.22303	0.00516667	0.0108667	99.9403	62.9491	0.6265
K6 500	K6_L3C8	Unzoned	0.0268	21.8882	52.7134	0.679975	0.6376	0.0041	-0.0027	0.04775	22.4683	1.30848	0.015775	-0.040725	99.8059	62.6252	0.621185
K6 500	K6_L3C13	Unzoned	0.00965	22.0395	52.8753	0.585525	0.75945	0.0123	-0.001625	0.1153	22.5923	1.28287	0.0112	-0.00405	100.312	62.5063	0.621832
K6 500	K6_L4C1	Unzoned	0.0115	22.0639	52.8174	0.527325	0.64885	0.009575	0.020425	0.0783	22.3939	1.2422	-0.003175	0.0089	99.8523	62.8726	0.624461
K6 500	K6_L4C4	Unzoned	0.0184	21.6586	52.2455	1.06933	0.586775	-0.0123	0.001075	0.0974	22.7856	1.25628	0.00245	0.00245	99.7696	62.1219	0.616074
K6 500	K6_L4C5	Unzoned	0.01245	21.8453	52.7887	0.627775	0.6203	-0.01095	0.006425	0.123075	22.4929	1.26035	-0.003325	-0.021125	99.8087	62.5751	0.620939
K6 500	K6_L4C7	Unzoned	0.013375	21.9156	52.4566	0.9276	0.6558	-0.01635	0.0118	0.139425	22.465	1.26113	-0.001575	0.033325	99.9085	62.6313	0.621957
K6 500	K6_L5C2	Unzoned	0.017725	21.9438	51.9738	1.00055	0.5129	-0.008225	0.009125	0.07675	22.4537	1.21982	-0.0021	0.056	99.2801	62.8542	0.622755
K6 500	K6_L5C6	Unzoned	0.017675	21.9306	52.8377	0.6348	0.610675	-0.012275	0.0075	0.08305	22.5093	1.27663	0.002625	0.0292	99.9618	62.6617	0.621529
K6 500	K6_L5C10	Unzoned	0.030125	21.8172	52.4575	0.702375	0.67065	0.019075	0	0.079525	22.2524	1.32322	-0.003675	0.0024	99.4025	62.7192	0.622366
K6 500	K6_L5C15	Unzoned	0.003425	22.0158	53.0676	0.664	0.77695	-0.005475	-0.002675	0.0825	22.386	1.25375	0.004025	0.017075	100.289	62.6603	0.623871
K6 250	K6_L8C2	Unzoned	0.017975	22.1142	52.8932	0.840025	0.6641	0.025775	0.00725	0.074475	22.8742	1.22967	0.016975	-0.044625	100.767	62.4271	0.620397
K6 250	K6_L8C8	Unzoned	0.00945	22.0735	53.4552	0.6748	0.776025	0.0121	0.000575	0.138525	22.7651	1.21245	0.0099	-0.007	101.163	62.3484	0.621188
K6 250	K6_L8C14	Unzoned	0.021625	22.0727	53.3278	0.7486	0.71745	0.01515	-0.000575	0.142975	22.8727	1.30088	-0.0103	0.012275	101.248	62.3175	0.619277
K6 250	K6_L8C21	Unzoned	0.01995	22.1913	52.8407	0.93785	0.906025	0.275675	0.016825	0.066475	22.2942	1.24897	0.033975	0.0202	100.871	62.7791	0.626753
K6 250	K6_L8C29	Unzoned	0.018425	21.7533	53.0654	0.76655	0.727525	-0.0137	0.003925	0.1259	23.0058	1.23085	-0.00355	0.007	100.735	61.8264	0.615179
K6 125	K6_L5C3	Unzoned	0.018425	21.7533	53.0654	0.76655	0.727525	-0.0137	0.003925	0.1259	23.0058	1.23085	-0.00355	0.007	100.735	61.8264	0.615179
K6 125	K6_L5C37	Unzoned	0.01165	22.0021	52.4714	0.831225	0.565575	0.0108	-0.002275	0.09505	23.0329	1.23938	0.00055	-0.0267	100.288	62.276	0.617557
K6 125	K6_L6C29	Unzoned	0.00865	22.1496	52.8747	0.6703	0.57725	-0.001525	-0.001725	0.0627	22.7362	1.30198	0.006675	-0.057975	100.418	62.712	0.621404
K6 125	K6_L7C5	Unzoned	0.020975	22.0886	53.107	0.6217	0.654475	0.01545	0.001125	0.111575	22.78	1.20375	0.018925	0.025	100.67	62.5059	0.621305

## Sheet: Opx profiles - compositions (2)
Dacites
Fraction (µm)	Sample	Na2O	MgO	SiO2	Al2O3	CaO	P2O5	K2O	TiO2	FeO	MnO	Cr2O3	NiO	Total	Distance from the rim (µm)	En (%)	Mg#
355	K6_L2C4	5.3402	0.9875	63.1969	15.2789	2.4403	0.0973	3.741	-0.066	1.7426	0.1395	0.0106	0.0417	93.0166	0	26.5529	0.48304
355	K6_L2C4	0.9233	17.2511	50.7707	5.1632	1.1767	-0.0339	0.7832	0.072	19.5211	0.9684	-0.0028	0.0684	96.6982	2.01	59.3882	0.599986
355	K6_L2C4	0.1258	20.5972	48.9963	4.3258	0.7731	-0.0271	0.0811	0.1016	21.0391	1.1627	-0.0112	-0.0239	97.2026	4.02	62.4998	0.623013
355	K6_L2C4	0.0089	22.2783	50.9379	0.5505	0.7686	-0.0068	-0.0248	0.0835	22.2304	1.3745	0.0154	-0.0102	98.248	6.03	63.1081	0.627022
355	K6_L2C4	0.014	21.9724	51.3012	0.6277	0.8024	-0.0068	-0.0113	0.0477	22.4846	1.1411	-0.0266	-0.0922	98.391	8.04	62.4876	0.623606
355	K6_L2C4	0.0255	21.7672	50.6652	0.726	0.7697	0.0406	0.0158	0.0655	22.556	1.3273	-0.0112	0.0341	97.9929	10.05	62.2379	0.618824
355	K6_L2C4	0.0343	21.8997	51.5207	0.6957	0.7613	0.0135	0.0473	0.161	22.355	1.2298	-0.056	0.0341	98.7525	12.06	62.5923	0.623223
355	K6_L2C4	-0.0013	22.1683	51.5417	0.6255	0.8134	0.0068	-0.0158	0.1402	22.1116	1.2733	0	-0.0205	98.6808	14.07	63.0545	0.628065
355	K6_L2C4	-0.0139	22.4263	51.7847	0.5277	0.769	-0.0542	-0.0023	0.179	22.0457	1.1587	-0.0042	0.0307	98.9219	16.08	63.447	0.63258
355	K6_L2C4	-0.0152	22.3691	51.3475	0.6674	0.8814	0	-0.027	0.1074	21.8915	1.2966	-0.0084	-0.0102	98.5609	18.09	63.3981	0.632132
355	K6_L2C4	0.0076	22.4448	51.5648	0.8516	0.9615	0.0407	0.0068	0.1584	21.7484	1.0611	0.0126	0.0171	98.8753	20.1	63.5172	0.636761
355	K6_L2C4	0.0316	22.5227	51.1586	0.7659	1.087	0	0.0023	0.1703	21.7472	1.2119	0.0098	0.0513	98.7585	22.11	63.4371	0.636032
355	K6_L2C4	0.0429	22.5514	51.6045	0.5803	0.9967	-0.0068	-0.0158	0.1196	21.5254	1.1338	0.0169	0.0205	98.5919	24.12	63.8066	0.639372
355	K6_L2C4	0.0214	22.5088	51.7159	0.6363	0.8625	-0.0271	0.0113	0.1524	21.6707	1.0644	-0.0323	0.0479	98.6915	26.13	63.7899	0.638173
355	K6_L2C4	0.0279	22.3826	50.9419	0.8298	0.7471	-0.0068	-0.0045	0.0775	22.2358	1.1742	0	-0.0137	98.4166	28.14	63.2389	0.630072
355	K6_L2C4	0.0279	22.1733	51.0471	0.8797	0.7918	0.0068	-0.009	-0.006	22.108	1.2365	-0.0434	0.0649	98.3359	30.15	63.0912	0.628526
355	K6_L2C4	-0.0292	22.1229	51.2561	0.8233	0.6786	0.0136	-0.009	0.167	22.0778	1.3486	-0.0252	-0.0102	98.4878	32.16	63.2153	0.627162
355	K6_L2C4	0.0279	22.0053	51.5951	0.8316	0.7778	-0.0068	-0.0135	0.1253	22.3359	1.0959	-0.0112	0.0307	98.8255	34.17	62.7028	0.625893
355	K6_L2C4	0.0051	22.082	51.1168	0.7388	0.7876	0.0474	0.0158	0.1849	22.2842	1.2964	-0.0042	0.0444	98.6035	36.18	62.8233	0.625201
355	K6_L2C4	0.0228	22.1314	51.9068	0.6543	0.7492	-0.061	-0.0203	0.1581	22.4999	1.1121	-0.0042	0.0547	99.2892	38.19	62.7091	0.625436
355	K6_L2C4	-0.0013	22.1407	51.6442	0.6165	0.6628	-0.0068	0	0.1402	22.186	1.2667	-0.021	0.0171	98.6742	40.2	63.145	0.627098
355	K6_L2C4	0.0076	22.1512	51.6726	0.609	0.7966	-0.0407	0.0023	0.182	22.11	1.2671	0.0028	-0.0103	98.8011	42.21	63.0598	0.627963
355	K6_L2C4	0.0355	22.2869	51.5809	0.6964	0.8261	0.0203	-0.0045	0.0477	22.0667	1.3161	-0.0028	0.0376	98.9141	44.22	63.2075	0.629326
355	K6_L2C4	0.0101	22.3594	51.6705	0.5295	0.8318	0.0068	0.0361	0.1672	21.9229	1.0901	0.0295	0.0478	98.7016	46.23	63.4204	0.633817
355	K6_L2C4	0.019	22.3489	51.7826	0.6633	0.9177	0.0475	-0.0203	0.1135	21.809	1.1824	0.0463	0.0479	98.978	48.24	63.4134	0.633914
355	K6_L2C4	0.0304	22.2614	51.5884	0.725	0.955	-0.0068	0.0248	0.1851	21.8652	1.2547	0.0407	-0.0205	98.9307	50.25	63.2174	0.631699
355	K6_L2C4	0	22.2291	51.0684	0.7634	1.0126	0.0136	0.0023	0.2209	21.7977	1.1261	0.0351	-0.0649	98.2691	52.26	63.1773	0.633357
355	K6_L2C4	0.0051	22.2875	51.518	0.7935	0.9337	-0.0339	-0.0023	0.1195	21.7558	1.0376	0.0225	-0.0786	98.4731	54.27	63.3826	0.635299
355	K6_L2C4	-0.0063	22.4732	51.6517	0.68	0.8786	0.0136	-0.0293	0.0986	21.7654	1.2156	-0.0337	-0.0034	98.7768	56.28	63.6366	0.635301
355	K6_L2C4	-0.0038	22.5451	52.2118	0.6215	0.8348	0.0068	-0.0023	0.0866	21.7081	1.3206	-0.0225	0.0376	99.3727	58.29	63.8252	0.635547
355	K6_L2C4	-0.0025	22.458	51.4263	0.6545	0.8372	-0.0678	-0.0113	0.1762	21.6641	1.1593	0.0084	-0.0376	98.3839	60.3	63.7773	0.636743
355	K6_L2C4	0.0455	22.3039	51.7808	0.7028	0.7887	0.0203	0	0.1373	21.8523	1.2507	-0.0168	-0.0102	98.8823	62.31	63.4901	0.632313
355	K6_L2C4	0.0164	22.3558	52.1609	0.6593	0.7789	0.0068	0	0.0746	21.8629	1.4018	-0.0631	0.0547	99.3721	64.32	63.5459	0.631213
355	K6_L2C4	0.0177	22.2872	51.8355	0.6072	0.7487	0.0475	0.0158	0.0895	21.8913	1.2869	-0.0196	0.0786	98.9059	66.33	63.4851	0.631379
355	K6_L2C4	0.0278	22.2746	51.9263	0.5345	0.7917	-0.061	-0.0023	0.0925	21.8428	1.2281	-0.0238	0.0581	98.7765	68.34	63.4653	0.632334
355	K6_L2C4	-0.0152	22.1947	52.0925	0.6629	0.8053	-0.0339	0.0023	0.006	21.9616	1.2809	0.0084	0.0068	99.0215	70.35	63.2439	0.629766
355	K6_L2C4	-0.0063	22.2945	52.0797	0.6626	0.7746	-0.0271	-0.0293	0.1642	21.8214	1.3004	0.014	0.0068	99.1181	72.36	63.53	0.63202
355	K6_L2C4	0.019	22.2912	51.8339	0.7574	0.7609	0	-0.027	0.0865	22.0417	1.3554	0.0154	-0.0171	99.1614	74.37	63.3213	0.629223
355	K6_L2C4	0.0013	22.3969	51.7141	0.6748	0.741	-0.0339	0.0248	0.0567	21.9441	1.34	0.0084	0.0205	98.9227	76.38	63.5554	0.631455
355	K6_L2C4	0.0177	22.3074	51.6094	0.7325	0.6792	-0.0136	-0.009	0.1224	21.8406	1.3332	-0.0056	0.0103	98.6525	78.39	63.6482	0.631628
355	K6_L2C4	0.0089	22.2304	51.5772	0.9352	0.721	-0.0136	0.0068	0.1074	22.0344	1.2443	-0.0252	-0.0137	98.8654	80.4	63.3169	0.629783
355	K6_L2C4	0.0127	22.2819	51.4094	0.9283	0.6657	0.0204	0.0068	0.0507	22.1126	1.0799	0.0196	0.0034	98.5913	82.41	63.3632	0.631207
355	K6_L2C4	0.0025	22.2238	51.6252	0.9474	0.6927	-0.0339	-0.0068	0.0836	21.8254	1.2217	0.0365	0.0239	98.6827	84.42	63.5591	0.632043
355	K6_L2C4	0.0101	22.3666	51.6282	0.6961	0.7394	-0.0203	0.0158	0.1104	21.887	1.4013	0.0224	-0.0171	98.8772	86.43	63.584	0.63109
355	K6_L2C4	0.0063	22.364	52.4223	0.7007	0.7072	-0.0204	-0.0023	0.0747	21.7765	1.3172	-0.0253	0.0786	99.4476	88.44	63.7355	0.633024
355	K6_L2C4	-0.0063	22.3732	51.8894	0.7828	0.6618	-0.0203	0.027	0.1014	21.9802	1.4045	0.0336	0.041	99.2948	90.45	63.5971	0.630197
355	K6_L2C4	0.0063	22.2984	51.7489	0.8211	0.7233	0.0542	-0.0158	0.1491	22.131	1.2697	0.0448	0.1025	99.3494	92.46	63.2873	0.629274
355	K6_L2C4	0.0025	22.2841	51.6767	0.7012	0.7529	0.0271	0.0248	0.0537	21.8214	1.385	-0.0154	0.0239	98.7533	94.47	63.5474	0.631051
355	K6_L2C4	0.0189	22.4054	52.2077	0.6626	0.7466	0.0339	0.0361	0.0239	21.6898	1.1792	0.0309	-0.0342	99.0351	96.48	63.8152	0.635737
355	K6_L2C4	0.005	22.3594	52.0117	0.7351	0.7838	0.0475	0.0203	0.0836	21.7159	1.248	-0.0098	-0.0171	99.0103	98.49	63.6925	0.634292
355	K6_L2C4	0.0076	22.4176	51.9931	0.7028	0.7504	-0.0068	-0.0068	0.1194	21.8716	1.2704	0.0491	0.0171	99.199	100.5	63.638	0.633101
355	K6_L2C4	0.0013	22.4204	51.94	0.6398	0.8009	0.0068	-0.0135	0.1075	21.8865	1.1102	-0.0098	0.0376	98.9511	102.51	63.5603	0.634611
355	K6_L2C4	0.0291	22.2228	51.8616	0.7168	0.8431	0.0136	-0.018	0.0895	21.8279	1.2309	-0.0238	-0.0137	98.8352	104.52	63.3596	0.631914
355	K6_L2C4	0.0139	22.2887	52.2957	0.6968	0.7532	0.0271	-0.0045	0.1045	21.8999	1.2377	0.0042	-0.0478	99.3216	106.53	63.4721	0.631809
355	K6_L2C4	-0.0063	22.142	52.5649	0.5585	0.8101	0.0068	-0.009	0.0896	21.5468	1.196	0.007	0.0376	98.9594	108.54	63.6048	0.634275
355	K6_L2C4	0.048	22.2893	52.115	0.6537	0.8713	-0.0271	0.018	0.1613	21.779	1.3271	0.0042	0.0239	99.2908	110.55	63.4419	0.63212
355	K6_L2C4	0.0038	22.193	52.0796	0.5791	0.9465	0.0271	-0.018	0.0358	21.7121	1.2253	-0.0126	-0.0034	98.8024	112.56	63.3116	0.632829
355	K6_L2C4	-0.0214	22.1486	52.1359	0.6349	0.9262	-0.0475	0.0203	0.1823	21.4806	1.2095	-0.0084	0.041	98.7793	114.57	63.5272	0.63488
355	K6_L2C4	0.0215	22.1598	51.7362	0.5686	0.8635	0.0339	0.0068	0.1343	21.7241	1.2997	0	-0.0649	98.5482	116.57	63.3726	0.631598
355	K6_L2C4	0.0189	22.2257	52.2554	0.6262	0.8798	0.0068	-0.018	0.1165	21.6745	1.2291	0.014	0.0103	99.0573	118.59	63.4707	0.633513
355	K6_L2C4	-0.0063	22.0811	52.1643	0.6583	0.8869	0.0136	-0.018	0.1731	21.749	1.3001	0.0056	-0.0786	99.0319	120.6	63.2342	0.630514
355	K6_L2C4	0.024	22.1656	51.7466	0.4765	0.8503	0.0339	-0.0158	0.1164	21.8195	1.2672	-0.0056	0.0444	98.5444	122.61	63.299	0.631028
355	K6_L2C4	-0.0101	22.1016	52.1961	0.5805	0.9039	0.0068	0.027	0.1164	21.6983	1.3594	0.021	-0.0068	99.0111	124.62	63.2851	0.630635
355	K6_L2C4	0.0252	22.1314	53.025	0.659	0.9424	0.0203	-0.0023	0.1642	21.8881	1.2118	-0.0337	0.0137	100.081	126.63	63.0743	0.630543
355	K6_L2C4	0.005	22.2988	52.4823	0.559	0.9102	0.0204	-0.0474	0.1255	21.6151	1.2291	0.0183	-0.0342	99.2636	128.64	63.5675	0.634876
355	K6_L2C4	0.0455	22.2435	51.6916	0.5761	0.9265	0.0542	0.0203	0.1911	21.7341	1.1923	-0.0154	-0.0068	98.6751	130.64	63.368	0.633472
355	K6_L2C4	0.0164	22.1126	51.4692	0.612	0.9299	-0.0542	0.018	0.1403	21.5302	1.271	-0.0225	-0.0239	98.0997	132.66	63.434	0.633362
355	K6_L2C4	-0.0101	22.0955	51.7629	0.5956	0.8771	-0.0407	0.0225	0.0895	21.8423	1.1686	0.021	0.0307	98.5059	134.67	63.1674	0.631068
355	K6_L2C4	-0.0038	22.1804	52.1494	0.6389	0.8426	0.0339	-0.0135	0.0776	21.8174	1.3235	0.014	0.0171	99.0949	136.67	63.3266	0.630631
355	K6_L2C4	0.024	22.2087	52.1011	0.6967	0.8246	0.0339	-0.0068	0.1105	21.7389	1.3693	0.0154	-0.0205	99.1232	138.68	63.4593	0.631251
355	K6_L2C4	-0.0114	22.1883	51.9546	0.6537	0.8488	0.0068	-0.0023	0.0597	21.7004	1.3858	0.0042	-0.0581	98.8023	140.7	63.4457	0.631256
355	K6_L2C4	0.0253	22.081	52.0902	0.7527	0.8301	0.0203	0.0203	0.0657	21.7701	1.3365	-0.0126	0.0683	99.0606	142.71	63.2866	0.629928
355	K6_L2C4	0.0038	22.0214	51.9923	0.6767	0.8439	-0.0068	0.027	0.1462	21.911	1.3525	-0.0014	0	98.9749	144.71	63.0627	0.627716
355	K6_L2C4	0.0253	22.1953	52.0846	0.8383	0.7665	0.0339	-0.009	0.0746	22.0204	1.3328	0.0196	0.0342	99.4255	146.72	63.2354	0.628658
355	K6_L2C4	0.0164	22.2148	51.9996	0.6934	0.7856	0.0339	0.0068	0.0866	21.8569	1.1495	-0.0014	0.0034	98.847	148.74	63.3966	0.632369
355	K6_L2C4	-0.0139	22.2968	52.3293	0.7109	0.7314	0.0136	0.0271	0.0717	21.5158	1.2452	-0.0197	-0.0444	98.9417	150.74	63.9011	0.635698
355	K6_L2C4	0.0139	22.3407	51.3178	0.7582	0.7448	0.0203	-0.009	0.1402	21.885	1.3062	0.007	0.0581	98.5922	152.75	63.5521	0.631804
355	K6_L2C4	0.0165	22.1572	51.7211	0.7699	0.6833	0.0475	0.0045	0.1074	22.021	1.293	0.0252	0.041	98.8875	154.77	63.3028	0.628654
355	K6_L2C4	0.0228	22.2319	52.3284	0.8001	0.6455	0	-0.0158	0.0896	21.9846	1.2874	-0.0028	0.0137	99.4038	156.77	63.467	0.62986
355	K6_L2C4	0.0139	22.2847	52.2017	0.7261	0.7061	0.0068	-0.0023	0.1015	21.9819	1.1887	0.0112	-0.0171	99.2226	158.78	63.446	0.631442
355	K6_L2C4	0.043	22.2889	51.9477	0.8063	0.6165	-0.0407	0.0023	0.1283	22.0658	1.29	0.0252	0.0239	99.2381	160.79	63.4817	0.629619
355	K6_L2C4	0	22.1478	52.4238	0.7326	0.6255	0.0136	0.0541	0.0865	22.0014	1.3227	0.0252	-0.0342	99.4331	162.8	63.3881	0.62845
355	K6_L2C4	0.0152	22.3611	51.6406	0.691	0.638	-0.0339	0.0203	0.1462	21.9953	1.2177	0.0014	0.0752	98.802	164.81	63.6002	0.631809
355	K6_L2C4	-0.0038	22.3971	51.8098	0.618	0.6147	0.061	-0.0113	0.0418	21.9921	1.2076	0.0084	-0.0102	98.7505	166.82	63.671	0.632318
355	K6_L2C4	-0.0051	22.322	51.7315	0.6346	0.5577	0.0204	-0.0023	0.1104	21.9312	1.3098	-0.0098	0.0137	98.6312	168.83	63.7296	0.63111
355	K6_L2C4	0.019	22.1319	52.9026	0.6778	0.6266	0.0136	-0.0248	0.0567	21.8897	1.4055	0.0337	-0.0068	99.7569	170.84	63.4839	0.628561
355	K6_L2C4	-0.0114	22.1025	52.2628	0.8826	0.5711	0.0339	0.009	0.0776	22.0408	1.2111	0.0098	0.0102	99.2115	172.85	63.3714	0.628709
355	K6_L2C4	0.019	22.0511	52.0528	0.9879	0.6343	0.0271	-0.0361	0.1074	22.0955	1.293	-0.0224	0.0615	99.3296	174.86	63.1793	0.626787
355	K6_L2C4	0.0278	22.1022	51.9904	1.0893	0.5817	0.0407	-0.0338	0.173	22.1234	1.2209	0.0126	0.0342	99.3961	176.87	63.2732	0.627779
355	K6_L2C4	0.0341	22.1555	52.0766	0.9337	0.6185	0.0068	-0.0271	0.0806	21.9341	1.2344	0.014	0.0034	99.0918	178.88	63.4739	0.630103
355	K6_L2C4	0.024	22.1726	52.067	0.7531	0.5667	-0.0068	-0.0158	0.1194	21.8619	1.2442	-0.0112	-0.0342	98.809	180.89	63.6334	0.630909
355	K6_L2C4	0.0329	22.2586	51.8449	0.7811	0.5809	0.0136	0.0225	0.0686	22.0308	1.2867	-0.0322	-0.0273	98.9207	182.9	63.532	0.629685
355	K6_L2C4	0.0341	22.2495	51.9655	0.7934	0.5292	0	-0.0135	0.0507	21.961	1.3293	-0.0028	0.0068	98.9197	184.91	63.6613	0.629856
355	K6_L2C4	0.0152	22.2948	52.5085	0.7493	0.5767	0.0543	0.0383	0.0716	22.0761	1.2805	-0.0028	-0.0068	99.6654	186.92	63.5291	0.629674
355	K6_L2C4	0.0278	22.2789	52.2437	0.7369	0.6336	0.0339	-0.0045	0.0865	21.9809	1.2639	0.007	-0.0342	99.2932	188.93	63.5352	0.630628
355	K6_L2C4	0.0743	22.2763	52.7965	0.7954	0.6343	-0.0136	0.0226	0.1106	21.6134	1.1962	-0.0084	-0.041	99.5195	190.94	63.9074	0.634998
355	K6_L2C4	0.0442	22.1978	52.4994	0.7577	0.599	0.0272	0.018	0.1493	21.6713	1.3368	0.0182	0.0342	99.3531	192.95	63.8129	0.63215
355	K6_L2C4	0.0215	22.2478	51.7968	0.7299	0.6042	0.0746	-0.0225	0.1552	21.8656	1.1918	-0.0112	-0.0103	98.6874	194.96	63.6588	0.632194
355	K6_L2C4	0.0189	22.3406	53.1967	0.8311	0.6338	0	-0.0203	0.1254	22.0214	1.2413	-0.0196	0.0205	100.43	196.97	63.5579	0.631095
355	K6_L2C4	0.0177	22.2665	53.0617	0.8347	0.6439	0.0272	0.0338	0.0956	21.8545	1.1629	-0.0379	-0.0376	99.9984	198.98	63.6376	0.632797
355	K6_L2C4	0.0278	22.2821	51.9729	0.7662	0.6685	0.0204	0.0023	0.0955	21.8582	1.274	0.0056	-0.0342	98.9735	200.99	63.6179	0.631789
355	K6_L2C4	0.038	22.2731	51.5159	0.7761	0.6477	-0.0203	0.0248	0.1223	21.9789	1.326	0.0196	-0.0273	98.7223	203	63.5129	0.629958
355	K6_L2C4	-0.0101	22.1858	52.2657	0.7986	0.6105	0.0204	0	0.1194	22.0119	1.2377	0.0028	-0.1265	99.2528	205.01	63.4367	0.629607
355	K6_L2C4	0.0139	22.2304	52.6838	0.8104	0.5955	-0.0068	0.0113	0.0687	21.9273	1.3401	0.0295	-0.0239	99.7108	207.02	63.5891	0.629884
355	K6_L2C4	0.0316	22.185	52.034	0.8528	0.6098	-0.0272	-0.0158	0.0746	21.933	1.1658	-0.0309	-0.0239	98.8868	209.03	63.5172	0.631123
355	K6_L2C4	0.0279	22.27	51.8974	0.8154	0.594	0.0068	0.0135	0.1372	22.0578	1.4044	0.0266	-0.0512	99.2509	211.04	63.4994	0.628347
355	K6_L2C4	0.1802	21.8064	49.4377	2.5365	0.7955	0	0.0068	0.0687	21.1747	1.324	-0.0267	0.0171	97.3475	213.05	63.6553	0.633216
355	K6_L2C4	0.1753	21.3212	51.5034	1.7919	0.7401	0.0271	0.0113	0.0627	21.4777	1.2087	-0.0309	-0.0103	98.3194	215.06	62.8907	0.626048
355	K6_L2C4	0.0494	22.1901	51.5573	0.899	0.5479	-0.0339	0.009	0.0716	21.9283	1.2997	-0.0322	0.0615	98.6138	217.07	63.6083	0.629861
355	K6_L2C4	0.019	22.1777	52.1872	0.8725	0.622	0	0.0338	0.1492	22.1365	1.1982	-0.007	0.0239	99.4199	219.08	63.2868	0.628675
355	K6_L2C12_1	0.0036	0.0069	-0.0018	-0.0138	-0.004	-0.0295	0.0081	0.0026	0.189	0.0239	0.0327	0.0193	0.286	0	6.26972	0.0545425
355	K6_L2C12_1	0.0136	0.001	0.0389	-0.0362	0.0124	0.0483	0.0083	-0.0191	0.23	-0.0122	-0.0176	0.0163	0.3688	2.01	0.719732	0.00812369
355	K6_L2C12_1	0.0247	-0.0018	0.0458	-0.0415	-0.0017	0.0061	0.0187	0.0082	0.2134	0.006	-0.0137	0.0456	0.3687	4.02	-1.54249	-0.0148362
355	K6_L2C12_1	-0.0138	0.0314	0.3942	0.0746	0.006	-0.0259	0.013	0.0257	0.3536	-0.0157	0.004	-0.077	0.9026	6.04	13.4142	0.14218
355	K6_L2C12_1	0.0115	0.1085	4.6338	1.0404	0.0784	0.0199	0.0264	-0.0058	3.4532	0.0734	0.004	-0.0336	9.4496	8.05	5.16158	0.0519779
355	K6_L2C12_1	0.0081	12.3094	47.5835	1.156	0.7885	0.047	0.0223	0.0853	25.3008	0.8303	-0.0041	0.0645	88.1958	10.06	45.473	0.456331
355	K6_L2C12_1	0.0242	16.0397	50.74	0.5202	0.5916	-0.0134	-0.0223	0.1673	28.9571	0.9198	0.0191	0	97.979	12.07	49.0366	0.48891
355	K6_L2C12_1	-0.0041	15.7358	49.7718	0.8212	0.4046	0.0201	0.0022	0.0907	30.1604	1.0466	0.0136	-0.0271	98.0669	14.08	47.7619	0.473254
355	K6_L2C12_1	-0.0013	18.954	50.7791	0.7646	0.5733	-0.027	0.0045	0.2217	25.8477	1.1629	0.0069	0.0442	98.3588	16.1	55.9669	0.55559
355	K6_L2C12_1	0.0101	21.7179	51.7585	0.6511	0.6996	-0.0068	-0.0158	0.0925	21.835	1.1686	-0.0196	0.0068	97.9401	18.11	63.0052	0.62712
355	K6_L2C12_1	0.0392	21.7318	52.2457	0.7226	0.727	0.0204	0.0045	0.1105	21.6083	1.2157	-0.0281	0	98.4256	20.12	63.2172	0.629093
355	K6_L2C12_1	0.0291	21.7924	52.0103	0.6439	0.707	-0.0204	-0.0045	0.1762	21.7468	1.2086	0.0154	-0.0444	98.3297	22.13	63.1657	0.628405
355	K6_L2C12_1	-0.0127	21.8698	51.9017	0.7057	0.6829	0.0136	-0.0113	0.1941	21.848	1.1001	0.0028	0.0649	98.3835	24.14	63.1761	0.629321
355	K6_L2C12_1	0.0139	21.859	52.504	0.7046	0.7196	0.0339	0.0203	0.1194	21.8358	1.2086	-0.021	0.0308	99.0499	26.16	63.129	0.628215
355	K6_L2C12_1	-0.0203	22.0734	52.0435	0.7512	0.6834	0.0203	-0.0383	0.1134	21.9783	1.3984	-0.0449	-0.0171	99.0618	28.17	63.258	0.627128
355	K6_L2C12_1	0.0089	22.0202	52.4015	0.6638	0.6794	-0.0407	0	0.0925	21.9149	1.2809	0.007	-0.0034	99.0691	30.18	63.2717	0.628393
355	K6_L2C12_1	0.0342	21.9038	52.3403	0.7736	0.8245	0.0136	0.0045	0.1164	21.9242	1.2771	0.0295	0.0273	99.2689	32.19	62.9497	0.6271
355	K6_L2C12_1	-0.0051	21.987	52.5404	0.7987	0.7455	0.0136	0.0045	0.1344	21.8865	1.1463	-0.014	0.0308	99.2877	34.21	63.1792	0.629703
355	K6_L2C12_1	-0.0063	22.0034	51.6962	0.7332	0.6899	0.0543	-0.0158	0.1045	21.8891	1.136	0.0252	0.0171	98.3488	36.22	63.2665	0.629956
355	K6_L2C12_1	0.0127	22.0435	51.8656	0.7551	0.7716	0.0203	-0.0135	0.1641	22.0656	1.3259	0.0224	-0.041	99.0468	38.23	63.0233	0.626672
355	K6_L2C12_1	0.024	22.1833	51.9467	0.7098	0.781	0	0.0113	0.0925	21.854	1.2281	0	0.0273	98.8582	40.24	63.3726	0.631265
355	K6_L2C12_1	0.0227	22.0689	52.6568	0.6094	0.693	-0.0204	-0.0248	0.1314	21.7465	1.1397	-0.0014	0.1538	99.2222	42.25	63.4773	0.632056
355	K6_L2C12_1	0.0379	22.0845	53.1018	0.6631	0.7116	-0.0136	-0.0248	0.0717	21.9457	1.3171	-0.0014	-0.0205	99.9333	44.27	63.2661	0.628396
355	K6_L2C12_1	0.0241	22.0237	51.7152	0.719	0.7145	0.0203	-0.018	0.0805	21.9511	1.3454	-0.014	0.0751	98.669	46.28	63.1927	0.627411
355	K6_L2C12_1	0.0202	22.0702	51.8767	0.717	0.7194	-0.0475	0.018	0.1104	21.8428	1.2476	0.021	0.0649	98.7082	48.29	63.3456	0.629988
355	K6_L2C12_1	0.0051	21.9662	52.0828	0.832	0.7194	-0.0204	-0.009	0.1104	21.9255	1.1951	0.021	-0.041	98.8576	50.3	63.1516	0.628589
355	K6_L2C12_1	0.019	22.0067	51.2273	0.8393	0.6787	-0.0068	-0.0113	0.1223	22.0002	1.3388	0.0084	0.0376	98.2782	52.31	63.1715	0.626805
355	K6_L2C12_1	0.0089	21.9132	51.5011	0.7807	0.7111	0.0271	0.0406	0.0626	22.0072	1.3095	-0.035	0.0478	98.4098	54.33	63.023	0.626036
355	K6_L2C12_1	-0.0177	22.0494	51.4171	0.7014	0.6613	-0.0068	-0.0113	0.0627	21.9496	1.07	0.0098	-0.0478	97.9214	56.34	63.2907	0.630507
355	K6_L2C12_1	0.0405	22.1573	51.873	0.6684	0.7745	0.0068	0.0135	0.0806	21.8349	1.3458	0	-0.0854	98.7952	58.35	63.3732	0.629985
355	K6_L2C12_1	0.0253	22.0659	52.4127	0.6386	0.7309	0.0204	0.0113	0.0985	21.9195	1.2507	0.028	-0.082	99.2018	60.36	63.248	0.629139
355	K6_L2C12_1	0.0038	21.9998	52.45	0.7467	0.7835	-0.0407	-0.0158	0.1224	21.9703	1.3855	0.0126	0.0444	99.5191	62.37	63.0582	0.626557
355	K6_L2C12_1	0.0582	21.9914	52.5194	0.7701	0.7729	0.0475	-0.0045	0.1761	22.0871	1.0834	0.0098	-0.0547	99.5158	64.39	62.9448	0.628368
355	K6_L2C12_1	0.0127	22.088	52.1089	0.7657	0.7311	0.0407	0	0.1583	21.9467	1.1165	-0.0084	-0.0957	98.9685	66.4	63.2433	0.630468
355	K6_L2C12_1	0.0367	22.0677	52.1669	0.7454	0.7424	0.0136	0.0203	0.1373	22.0004	1.2441	-0.0126	0.0171	99.1919	68.41	63.1528	0.628412
355	K6_L2C12_1	0.0013	22.146	51.4113	0.7034	0.6985	0	-0.0068	0.0775	21.9184	1.4014	-0.0266	0	98.3577	70.42	63.3755	0.628464
355	K6_L2C12_1	0.0101	22.0921	51.7524	0.735	0.7553	0.0339	0.018	0.1344	21.7008	1.1298	0.0084	-0.0513	98.3702	72.44	63.4667	0.632866
355	K6_L2C12_1	-0.0266	22.0434	51.8028	0.6465	0.7113	0.0068	0.0023	0.212	21.7926	1.2019	-0.0267	0.0581	98.4777	74.45	63.3793	0.63068
355	K6_L2C12_1	0.0025	22.114	51.7452	0.6666	0.7176	0.0339	-0.018	0.0895	21.9658	1.1688	-0.0084	-0.0034	98.5039	76.46	63.2689	0.630015
355	K6_L2C12_1	0.0253	22.1438	51.6531	0.6851	0.7649	0.0068	0.0045	0.0388	21.9304	1.1984	-0.0308	-0.0376	98.451	78.47	63.2746	0.630384
355	K6_L2C12_1	0.0063	22.0932	52.0253	0.6066	0.7898	-0.0271	-0.0045	0.0865	21.9581	1.2672	0	-0.0615	98.8331	80.48	63.161	0.628871
355	K6_L2C12_1	0.0165	22.0428	51.9255	0.7676	0.7995	0.0136	0.0113	0.0895	22.1413	1.1751	0.0042	0.0137	99.0005	82.49	62.9102	0.627436
355	K6_L2C12_1	0.038	22.0164	51.701	0.7731	0.7638	0.0407	0.0225	0.0836	21.7887	1.3657	0.0126	0.0581	98.6642	84.51	63.2861	0.628759
355	K6_L2C12_1	0.0418	22.0287	52.131	0.7112	0.7963	-0.0611	-0.0045	0.1224	21.8362	1.225	-0.014	0.0889	98.9813	86.52	63.2083	0.629847
355	K6_L2C12_1	0.0152	21.9806	52.3004	0.7074	0.7847	-0.0204	-0.0316	0.1164	22.0768	1.2151	-0.0098	0.0171	99.2138	88.53	62.9284	0.627015
355	K6_L2C12_1	0.0101	22.0357	52.3412	0.6208	0.7605	0.0204	-0.0023	0.0567	21.9644	1.2936	0.0463	0.0854	99.235	90.54	63.132	0.627931
355	K6_L2C12_1	0.0139	22.0979	52.2268	0.6861	0.7787	-0.0136	0.0203	0.0179	22.0296	1.1265	0.0196	-0.0342	99.0173	92.56	63.108	0.629634
355	K6_L2C12_1	0.0177	22.2409	50.983	0.6934	0.7244	0.0339	0.0518	0.0477	22.0073	1.1485	-0.0378	0.0478	97.9966	94.57	63.3509	0.631138
355	K6_L2C12_1	-0.0013	22.1391	51.4546	0.6652	0.7029	0.0339	-0.0338	0.0507	21.8812	1.3683	-0.0476	-0.0615	98.296	96.58	63.4004	0.6291
355	K6_L2C12_1	0.0089	22.125	51.4639	0.6905	0.722	-0.0136	-0.0135	0.1104	21.7687	1.2741	0.021	0.0137	98.1982	98.59	63.4754	0.631043
355	K6_L2C12_1	0.0177	22.2168	51.5504	0.7596	0.7665	0.0068	0.0045	0.1015	21.9232	1.2837	0.0154	-0.0376	98.6461	100.6	63.3562	0.630355
355	K6_L2C12_1	-0.0063	22.0866	51.3372	0.696	0.7895	-0.0068	-0.0045	0.1074	21.8797	1.2999	-0.0112	0.0068	98.2031	102.62	63.2339	0.629256
355	K6_L2C12_1	-0.0392	22.1131	52.4437	0.6963	0.6952	-0.0136	-0.0135	0.0567	21.9758	1.2244	0.0603	0.0273	99.2927	104.63	63.2869	0.629339
355	K6_L2C12_1	0.0051	22.1305	52.5268	0.7745	0.6966	0	0.0068	0.0747	21.9537	1.324	-0.007	-0.0205	99.4925	106.64	63.3258	0.628732
355	K6_L2C12_1	0.0228	22.0943	52.1353	0.6551	0.7177	0.0271	-0.009	0.1164	21.9408	1.0902	0.0266	-0.0103	98.8265	108.65	63.2734	0.630863
355	K6_L2C12_1	-0.0241	22.243	51.6121	0.6727	0.7176	-0.0271	-0.0271	0.0328	21.9025	1.3099	-0.0126	0.0444	98.535	110.66	63.4682	0.630571
355	K6_L2C12_1	0.0329	22.2304	51.4422	0.5987	0.7317	0.0203	-0.027	0.0358	22.0347	1.2407	-0.0056	-0.041	98.3674	112.68	63.3027	0.629816
355	K6_L2C12_1	0.0328	22.2068	52.5594	0.6713	0.652	0.0136	-0.018	0.0896	21.7993	1.3175	0.0309	-0.0171	99.3732	114.69	63.6213	0.631151
355	K6_L2C12_1	0.0051	22.251	51.3877	0.6002	0.7265	0.0678	0.0135	0.1433	21.7258	1.2017	-0.0084	0.0649	98.1874	116.7	63.6449	0.633538
355	K6_L2C12_1	-0.0127	22.2424	51.9776	0.5164	0.7078	0.0475	-0.0023	0.0269	21.9695	1.2344	-0.0252	-0.0103	98.7225	118.71	63.4123	0.630659
355	K6_L2C12_1	0.0531	22.1291	52.5747	0.5338	0.7073	-0.0136	-0.0361	0.0448	21.8912	1.2252	-0.0239	-0.0273	99.1591	120.72	63.374	0.63035
355	K6_L2C12_1	0.0114	22.3121	51.2372	0.5389	0.6573	-0.0407	0.0068	0.1342	22.0633	1.1384	-0.0014	0.0102	98.1099	122.74	63.4554	0.631422
355	K6_L2C12_1	0.0291	22.1084	52.2731	0.5215	0.6987	-0.0407	0.0023	0.0269	22.0574	1.2966	-0.042	0.0342	99.0482	124.75	63.1946	0.627738
355	K6_L2C12_1	0.0317	21.98	51.4686	0.6507	0.6504	0.0203	0.0473	0.1342	22.0507	1.2537	-0.0084	0.0478	98.3354	126.76	63.1287	0.626879
355	K6_L2C12_1	0.0127	22.0582	52.3749	0.6496	0.7085	0.0068	0.0225	0.0776	22.0826	1.1815	-0.0533	0.0888	99.2637	128.77	63.1035	0.628122
355	K6_L2C12_1	-0.0063	22.1379	51.7769	0.6144	0.6557	0	-0.0113	0.0895	22.0864	1.2206	0.0014	0.0683	98.651	130.79	63.2521	0.62853
355	K6_L2C12_1	0.0303	22.0346	52.8495	0.746	0.6625	0.0068	-0.0293	0.0358	21.8522	1.1952	-0.0267	0.0513	99.4642	132.8	63.373	0.630053
355	K6_L2C12_1	0.0392	22.1198	52.1394	0.6786	0.7417	0.0611	-0.0023	0.0537	21.87	1.2477	-0.0252	0.0103	98.9614	134.81	63.3409	0.630236
355	K6_L2C12_1	0.043	22.1787	51.9851	0.6916	0.6864	0.0543	-0.0045	0.1702	21.776	1.2611	0.0168	-0.0068	98.8632	136.82	63.5707	0.631667
355	K6_L2C12_2	-0.0051	21.9114	52.2162	0.6028	0.7488	0.0271	-0.0135	0.0806	22.0659	1.2869	0.0154	0.0854	99.0407	0	62.9124	0.625658
355	K6_L2C12_2	0.0152	21.906	52.5249	0.5952	0.8065	0.0068	-0.0023	0.0686	22.2804	1.2536	-0.0126	-0.0786	99.4571	2.04	62.6158	0.623793
355	K6_L2C12_2	0.0127	21.9157	52.3119	0.617	0.7282	0	0.0338	0.0955	22.1842	1.2015	-0.014	0.0376	99.1382	4.08	62.824	0.625385
355	K6_L2C12_2	0.0025	21.8329	52.7307	0.4914	0.7666	0.0271	0.009	0.1522	22.0253	1.2344	0.0126	-0.0103	99.2848	6.12	62.8467	0.625759
355	K6_L2C12_2	0.0317	21.9062	52.4763	0.5733	0.8318	0.0339	-0.0473	0.0746	22.0449	1.2311	-0.028	-0.082	99.2038	8.16	62.8205	0.62638
355	K6_L2C12_2	0.0178	21.8864	52.0973	0.6588	0.7796	-0.0475	0.009	0.1969	22.2559	1.2209	-0.0168	0.0547	99.1774	10.21	62.6541	0.624158
355	K6_L2C12_2	0	21.8527	52.3517	0.7254	0.7565	-0.0136	-0.0045	0.0955	22.4849	1.1156	0.0098	-0.0205	99.392	12.25	62.4179	0.622577
355	K6_L2C12_2	-0.019	21.883	51.495	0.6888	0.7782	0.0543	0.027	0.0746	22.3346	1.0864	-0.0112	-0.0171	98.4219	14.29	62.5731	0.624696
355	K6_L2C12_2	0.0228	21.8246	52.3512	0.7449	0.7637	0.0407	-0.0203	0.1313	22.1205	1.3391	-0.0098	-0.0444	99.3387	16.33	62.7451	0.623651
355	K6_L2C12_2	0.0152	21.9465	52.2429	0.6171	0.7122	-0.0407	0.0496	0.1343	22.1102	1.2871	0.0294	-0.0068	99.1447	18.37	62.9524	0.625587
355	K6_L2C12_2	0.0076	21.9466	51.8856	0.6971	0.7351	-0.061	-0.018	0.1313	22.339	1.0927	-0.0168	-0.0137	98.8349	20.41	62.6921	0.625269
355	K6_L2C12_2	0.0076	21.9212	52.1669	0.7471	0.7245	0.0136	0.0248	0.0985	22.0723	1.2998	0.0182	-0.0239	99.0944	22.45	62.9479	0.625567
355	K6_L2C12_2	-0.0013	22.0174	51.1944	0.5894	0.767	0.0542	-0.018	0.0805	22.0204	1.2697	-0.021	-0.0854	97.9932	24.49	63.0474	0.627418
355	K6_L2C12_2	0.0076	21.9634	51.5358	0.6763	0.782	-0.0339	0.0135	0.0835	22.3903	1.2923	0.021	-0.099	98.7657	26.54	62.5983	0.622926
355	K6_L2C12_2	0.0266	21.9928	52.5975	0.5517	0.7115	-0.0068	-0.0113	0.1045	22.0334	1.2511	-0.0028	-0.0376	99.2691	28.58	63.0803	0.627215
355	K6_L2C12_2	0.0089	22.1192	52.1204	0.5235	0.7336	0.0136	0.0203	0.1522	21.9991	1.2508	-0.0294	0.0752	99.0166	30.62	63.2197	0.628901
355	K6_L2C12_2	0.0076	22.1201	52.1971	0.6408	0.7556	0	0.0135	0.1163	22.1108	1.3095	0.0392	0.0102	99.3209	32.66	63.0792	0.627198
355	K6_L2C12_2	0.0266	21.9451	52.3389	0.6076	0.7433	0.0203	0.0225	0.1044	21.9338	1.2935	-0.0308	-0.0137	99.0361	34.7	63.0896	0.627276
355	K6_L2C12_2	-0.0013	21.9095	52.0979	0.8283	0.7398	0.0339	0.0023	0.1462	22.039	1.1818	-0.0098	0.0444	99.0232	36.74	62.9494	0.626977
355	K6_L2C12_2	0.0292	21.9812	51.9814	0.8779	0.8243	-0.0203	-0.009	0.1014	22.2372	1.2964	0.0729	-0.0171	99.4019	38.78	62.7164	0.624596
355	K6_L2C12_2	-0.0101	22.0766	51.3859	0.5947	0.6788	-0.0136	0.0045	0.1282	21.9497	1.3127	-0.007	0.0307	98.1619	40.82	63.2964	0.628317
355	K6_L2C12_2	-0.0051	22.097	51.0029	0.6804	0.7689	-0.0271	0.0225	0.0507	21.9591	1.2599	0.014	-0.0717	97.8555	42.86	63.1911	0.628975
355	K6_L2C12_2	0.0279	22.0297	51.9504	0.7188	0.6854	-0.0271	-0.0338	0.0895	22.0246	1.2211	-0.0266	0.0444	98.7916	44.9	63.1622	0.628
355	K6_L2C12_2	0.019	22.1315	51.4535	0.7814	0.677	-0.0136	0.0518	0.0328	22.071	1.4109	-0.007	0.0239	98.6528	46.95	63.2333	0.626692
355	K6_L2C12_2	-0.0278	22.0786	51.8738	0.6863	0.7283	-0.0204	-0.0293	0.0537	21.9552	1.2278	-0.0014	0.0308	98.6344	48.99	63.2285	0.629147
355	K6_L2C12_2	0.0215	22.0346	52.1672	0.6225	0.7435	0.0882	0	0.0866	22.0834	1.0638	0.0308	0.0171	98.9593	51.03	63.0323	0.629063
355	K6_L2C12_2	0.0329	22.1075	52.1606	0.6191	0.7541	0.0203	-0.0338	0.0955	21.9744	1.2476	0.0337	-0.041	99.0457	53.07	63.2059	0.629058
355	K6_L2C12_2	0.0114	22.0963	51.7368	0.582	0.7638	0.0475	-0.0225	0.0567	21.9362	1.4344	-0.0294	-0.1367	98.665	55.11	63.2202	0.627427
355	K6_L2C12_2	0.0418	21.9995	51.9321	0.7187	0.6906	-0.0136	0	0.0089	21.927	1.339	0.0196	-0.0649	98.6773	57.15	63.2229	0.62746
355	K6_L2C12_2	0.0291	22.0417	51.8242	0.7947	0.6889	-0.0136	0	0.0716	21.8559	1.2769	-0.0252	-0.0513	98.5829	59.19	63.3421	0.629256
355	K6_L2C12_2	0.0089	22.0926	50.8696	0.7186	0.6941	0.0271	0.0113	0.1134	21.9647	1.1356	0.0294	0.0137	97.6789	61.23	63.2781	0.630139
355	K6_L2C12_2	0.0291	22.1001	51.2023	0.7492	0.7149	0.0475	0.0045	0.1373	21.9486	1.192	-0.0084	-0.0308	98.1254	63.27	63.2752	0.629805
355	K6_L2C12_2	0.0139	22.205	52.1823	0.7227	0.6963	0.0475	-0.0068	0.1224	21.9603	1.2972	-0.0309	0.0718	99.3193	65.32	63.3975	0.629722
355	K6_L2C12_2	0.0317	22.1198	52.1796	0.7571	0.6827	0.0068	0.009	0.1343	22.1545	1.241	-0.0322	-0.0649	99.3165	67.36	63.1291	0.627451
355	K6_L2C12_2	0.0418	22.1581	51.7374	0.6905	0.7485	0.0339	-0.0023	0.1193	22.0744	1.2767	0.0042	0.0307	98.9155	69.4	63.1651	0.628294
355	K6_L2C12_2	-0.0051	22.1383	52.2883	0.6319	0.6651	0.0407	-0.0158	0.1045	22.0057	1.1623	0.0056	0.0889	99.1313	71.44	63.3222	0.629936
355	K6_L2C12_2	0.0114	22.1639	51.911	0.6488	0.6962	0.0068	0	0.1134	21.977	1.3036	0.0014	0.0342	98.8677	73.48	63.3377	0.629057
355	K6_L2C12_2	0.0329	22.1648	51.8572	0.7592	0.7012	0.0136	-0.0383	0.0537	22.1157	1.3619	-0.0042	0.0512	99.1115	75.52	63.1916	0.627092
355	K6_L2C12_2	0.019	22.1305	52.0478	0.7567	0.7106	-0.0204	0.0428	0.1821	21.8923	1.2613	-0.007	-0.0103	99.0433	77.56	63.37	0.629986
355	K6_L2C12_2	-0.0304	22.1207	51.1829	0.6932	0.7367	0.1153	-0.0248	0.0747	21.9559	1.1793	-0.0014	0.0103	98.0689	79.6	63.2611	0.630078
355	K6_L2C12_2	0.0379	21.7201	50.1642	0.7085	1.9052	1.0387	0.0112	0.1196	21.3229	1.2947	0.0352	0.0205	98.3787	81.65	61.9664	0.631073
355	K6_L2C12_2	0.0253	21.9787	52.0985	0.7958	0.732	-0.0271	-0.018	0.1194	21.8982	1.192	0.0112	0.0103	98.8613	83.69	63.1762	0.629029
355	K6_L2C12_2	0.0139	22.1807	51.5458	0.7182	0.7086	-0.0068	0.0248	0.0686	22.0899	1.2245	0.0014	-0.0376	98.5764	85.73	63.2248	0.628906
355	K6_L2C12_2	0.0253	22.1461	51.8708	0.6142	0.719	-0.0068	0.0068	0.0686	22.0554	1.2668	-0.0028	0.0273	98.8003	87.77	63.2099	0.628458
355	K6_L2C12_2	0.0013	22.0908	51.6232	0.6435	0.6896	0.0203	0.0068	0.1342	21.9362	1.4146	0.0168	0.082	98.6593	89.81	63.311	0.627569
355	K6_L2C12_2	-0.0279	22.1372	51.5563	0.7121	0.7296	0.0407	-0.0045	0.1372	21.9798	1.3062	0.0056	-0.0068	98.6047	91.85	63.2634	0.628722
355	K6_L2C12_2	-0.0013	22.0616	52.3267	0.7253	0.6962	0.0407	0.0338	0.1194	21.9716	1.2347	-0.014	-0.0068	99.21	93.89	63.2357	0.628732
355	K6_L2C12_2	-0.0051	22.1763	51.4504	0.8429	0.6127	0	-0.0068	0.1372	22.0097	1.2927	0.0252	-0.0649	98.5471	95.93	63.4262	0.628971
355	K6_L2C12_2	-0.0051	22.0955	52.5796	0.8048	0.7143	0.0068	0.0113	0.0299	22.0205	1.202	0.0014	0.0479	99.514	97.98	63.1982	0.628932
355	K6_L2C12_2	0.0152	22.1967	52.2373	0.7421	0.6731	-0.0204	-0.018	0.1373	22.0023	1.123	-0.0309	0.0308	99.1577	100.02	63.3764	0.630984
355	K6_L2C12_2	0.0291	22.2524	52.2092	0.5922	0.657	0.0204	0.0135	0.1075	21.8038	1.2807	-0.0014	-0.0615	98.9657	102.06	63.6576	0.631958
355	K6_L2C12_2	0.0366	22.2922	51.6211	0.77	0.6883	0.0068	0.0068	0.1344	21.6578	1.2284	-0.0253	0	98.4422	104.1	63.8073	0.634382
355	K6_L2C12_2	0.0151	22.248	52.2523	0.7656	0.6385	0.0204	-0.0135	0.0687	21.8186	1.1463	-0.0295	-0.0308	98.9734	106.14	63.6621	0.633136
355	K6_L2C12_2	0.0189	22.2487	52.2563	0.7925	0.6818	0.0339	-0.018	0.0776	21.8727	1.3394	-0.0196	0.0068	99.3286	108.18	63.5511	0.63063
355	K6_L2C12_2	0.0253	22.0491	51.4656	0.6935	0.9487	0.0339	0.0315	0.1135	21.6579	1.248	-0.0379	0.0171	98.2841	110.22	63.2125	0.631633
355	K6_L2C12_2	0.0329	22.261	51.4423	0.6998	0.7309	0	0.009	0.0985	21.6909	1.3069	0.0168	-0.0205	98.2889	112.26	63.6852	0.632918
355	K6_L2C12_2	0.0038	22.2405	51.3396	0.7596	0.691	-0.0068	0.0158	0.2147	22.0645	1.2533	0.0126	-0.0034	98.5953	114.3	63.3359	0.629496
355	K6_L2C12_2	0.0165	22.3525	51.1898	0.7514	0.6986	0	0	0.1313	21.9226	1.1422	-0.0196	0.0752	98.2799	116.34	63.5863	0.633217
355	K6_L2C12_2	0.0051	22.3856	51.7819	0.729	0.669	0.0068	-0.0023	0.1163	21.9291	1.467	0.0028	0.0957	99.1884	118.39	63.6524	0.630204
355	K6_L2C12_2	0.0126	22.2231	51.8291	0.7549	0.6843	0.0136	-0.009	0.0597	21.8006	1.2505	0.0238	0.0068	98.6591	120.43	63.5947	0.631992
355	K6_L2C12_2	0.0114	22.2095	52.1898	0.767	0.6598	-0.0068	-0.0338	0.1165	21.6344	1.2416	-0.0112	-0.0239	98.83	122.47	63.7829	0.633621
355	K6_L2C12_2	-0.0025	22.2403	51.4728	0.8787	0.7354	0.0271	0.0023	0.1373	21.8044	1.1723	-0.0168	-0.0103	98.4707	124.51	63.5419	0.632933
355	K6_L2C12_2	0.019	22.3473	51.6841	0.7449	0.7624	-0.0068	0.009	0.009	21.8091	1.1986	-0.0295	0.0239	98.6072	126.55	63.6131	0.633731
355	K6_L2C12_2	-0.0202	22.4448	51.6335	0.716	0.7152	0.0204	-0.0293	0.1493	21.6244	1.153	0.0042	-0.0342	98.4607	128.59	63.9636	0.637075
355	K6_L2C12_2	0.0366	22.2751	52.5603	0.693	0.6704	0.0407	0.0135	0.1911	21.9304	1.2645	0.0182	0.0068	99.7006	130.63	63.5347	0.631088
355	K6_L2C12_2	-0.0114	22.2613	52.5892	0.6859	0.6999	0.0136	-0.0023	0.0299	21.8813	1.3365	0.0477	-0.0718	99.5451	132.67	63.5318	0.630705
355	K6_L2C12_2	0.024	22.2082	52.7415	0.7411	0.7109	0.0272	0.0474	0.0777	21.7371	1.2583	0.0126	-0.0308	99.586	134.71	63.6092	0.632397
355	K6_L3C1	1.9645	0.0112	85.8199	5.2301	0.4395	0.0501	1.1507	0.2056	0.3889	0.0172	-0.0107	0.0245	95.3023	0	2.0541	0.046834
355	K6_L3C1	2.4076	0.0118	80.2428	8.2497	1.3131	-0.0284	1.6851	0.1676	0.3469	-0.0034	0.0322	0.0245	94.4813	2.01	1.02594	0.0577083
355	K6_L3C1	4.4248	0.0095	76.4456	13.2675	2.5365	0.0494	1.4556	0.1515	0.5108	-0.0479	-0.0092	-0.0453	98.8511	4.02	0.448303	0.035337
355	K6_L3C1	3.6725	0.0183	75.2214	14.3335	2.9079	0.0494	1.4055	0.1863	0.5988	0.0411	-0.0092	-0.0384	98.4346	6.03	0.748709	0.0484673
355	K6_L3C1	2.7152	0.5083	71.2779	11.9822	2.4059	0.0566	0.833	0.082	1.1509	-0.0034	0.0031	-0.0558	91.0152	8.04	17.6301	0.441227
355	K6_L3C1	0.3223	18.8516	52.6423	2.7083	0.9704	0.0204	0.122	0.1499	20.059	1.0835	0.024	0.0753	97.029	10.05	61.2025	0.613655
355	K6_L3C1	0	21.7411	51.3679	0.7424	0.6994	-0.0271	0.0158	0.17	21.9774	1.2505	-0.0056	-0.0205	97.9645	12.06	62.8847	0.62509
355	K6_L3C1	-0.0025	21.7681	51.885	0.646	0.6988	-0.0271	-0.0158	0.1252	22.4399	1.154	-0.0266	0.0512	98.7681	14.07	62.4462	0.621726
355	K6_L3C1	0.0254	21.6378	51.8756	0.559	0.7929	-0.0271	-0.0315	0.1491	22.2623	1.2107	0.0112	0.0102	98.5343	16.08	62.3627	0.621514
355	K6_L3C1	0.038	21.7685	51.5772	0.6409	0.8246	-0.0203	0.0203	0.0209	22.1192	1.0404	0.0028	-0.0137	98.0526	18.09	62.6073	0.626101
355	K6_L3C1	0.0051	21.8789	51.0888	0.6509	0.7964	0.0271	0.0135	0.1521	22.1049	1.1976	-0.0224	0.0478	97.9632	20.1	62.7766	0.625826
355	K6_L3C1	0.0126	22.1513	52.0105	0.5831	0.7741	0.0068	-0.0271	0.0119	21.7764	1.215	-0.0042	0.0718	98.6135	22.11	63.427	0.631847
355	K6_L3C1	0.005	22.414	51.4335	0.5711	0.8422	0.0136	-0.0045	0.0687	21.4372	1.1138	-0.014	-0.0308	97.8992	24.12	63.957	0.639068
355	K6_L3C1	0.0151	22.4564	51.4536	0.5311	0.7555	-0.0204	0.0248	0.1225	21.3387	1.1565	0.0211	0.0068	97.8821	26.13	64.2157	0.640069
355	K6_L3C1	0.0063	22.4212	51.6073	0.6104	0.8187	0.0136	0.0429	0.1077	21.1791	0.9699	-0.0084	-0.0171	97.777	28.14	64.2608	0.643297
355	K6_L3C1	0.0101	22.6883	51.5839	0.5625	0.828	0.0136	0.0293	0.1494	21.318	1.2225	-0.0281	0.1094	98.515	30.15	64.3774	0.641962
355	K6_L3C1	0.0151	22.5685	51.6165	0.8674	0.8435	0.0339	-0.0226	0.1166	21.0635	1.1802	0.0225	-0.0479	98.3276	32.16	64.4976	0.643793
355	K6_L3C1	0.0189	22.4516	51.3415	1.1426	0.8561	0.034	0.0135	0.0897	21.1434	1.029	-0.0028	-0.0752	98.1202	34.17	64.2793	0.643358
355	K6_L3C1	0	22.522	51.0463	1.249	0.9816	0.0068	0.0158	0.2363	21.019	1.0651	-0.0113	0.0205	98.1623	36.18	64.3136	0.644984
355	K6_L3C1	0.0175	22.6976	51.2457	1.3704	0.982	0.0204	0.0023	0.2366	20.6655	0.9083	-0.0197	-0.1163	98.1463	38.19	64.8566	0.652101
355	K6_L3C1	0.0687	22.9207	50.9846	1.5786	1.1271	-0.0272	-0.0068	0.1588	20.3739	1.0931	-0.0183	-0.0205	98.3053	40.2	65.189	0.655413
355	K6_L3C1	0.041	23.1052	50.9862	1.7143	1.5832	0	0.0158	0.2705	19.7579	0.8347	0.0014	-0.0103	98.3102	42.21	65.4035	0.666557
355	K6_L3C1	0.041	23.0909	51.0921	1.8147	1.6088	0.0068	0.0045	0.2554	19.7851	0.8477	0.0212	0.0308	98.5991	44.22	65.3273	0.665984
355	K6_L3C1	-0.0198	23.1528	51.2636	1.9247	1.4867	0.0544	0.0429	0.2676	19.6671	0.6631	-0.0298	-0.0343	98.5228	46.22	65.6734	0.669879
355	K6_L3C1	0.036	23.2386	50.5604	1.9581	1.4347	0.0136	0.0158	0.3064	19.8019	0.7716	0.0297	-0.0342	98.1668	48.24	65.6857	0.66805
355	K6_L3C1	0.0297	22.7811	51.3051	2.0655	1.7139	0.0204	0.0045	0.2315	19.3739	0.9468	0.0227	0.089	98.5842	50.25	65.3099	0.666354
355	K6_L3C1	0.0509	23.0462	51.5727	1.8221	1.2664	0.0204	0	0.1862	19.817	0.9694	0.017	0.0274	98.7956	52.25	65.7081	0.663884
355	K6_L3C1	-0.0162	23.5005	52.2853	0.8567	0.8985	-0.0272	0.0249	0.162	20.038	0.9988	0.0325	-0.0548	98.7971	54.26	66.4091	0.665564
355	K6_L3C1	0.0037	23.2649	52.5929	0.6464	0.8671	-0.0476	0.0475	0.105	20.3485	0.9721	0	-0.0685	98.848	56.28	65.8997	0.660323
355	K6_L3C1	0.0163	23.0932	52.1638	0.6396	0.7772	0.0408	0	0.1108	20.7023	1.1024	-0.0437	0.0342	98.6805	58.28	65.4836	0.65358
355	K6_L3C1	0.0038	22.8725	52.1631	0.7063	0.8259	-0.0068	-0.0203	0.1496	20.9181	1.161	-0.0338	-0.0752	98.8003	60.29	64.9768	0.648551
355	K6_L3C1	0.0113	22.6445	51.7187	0.6976	0.7897	-0.0068	0.0023	0.1584	21.1512	1.1505	0.0155	-0.041	98.3397	62.3	64.5552	0.643971
355	K6_L3C1	-0.0013	22.6134	52.1903	0.6268	0.7745	-0.0204	0.0023	0.0329	21.4353	1.2554	-0.0225	0.041	98.972	64.31	64.2515	0.639669
355	K6_L3C1	-0.0025	22.5126	52.0745	0.596	0.8706	0.0271	-0.0045	0.0329	21.5106	1.3701	-0.0225	-0.0342	98.9945	66.32	63.946	0.636698
355	K6_L3C1	0.0088	22.4067	52.0911	0.641	0.7784	-0.0339	0.0203	0.1672	21.644	1.3204	-0.0098	0.0171	99.095	68.33	63.8217	0.634768
355	K6_L3C1	-0.0076	22.4878	51.6378	0.6491	0.7715	-0.0204	0.009	0.1284	21.5284	1.1892	-0.0126	-0.0684	98.4011	70.34	64.0321	0.638119
355	K6_L3C1	-0.0151	22.3858	51.9462	0.784	0.7669	0.0407	0.0113	0.0836	21.6653	1.212	-0.0014	0.0205	98.9164	72.35	63.7934	0.635446
355	K6_L3C1	-0.0228	22.2853	51.5364	0.7721	0.722	0.0136	-0.0293	0.1582	21.6213	1.445	0.0154	-0.041	98.5694	74.36	63.7933	0.632464
355	K6_L3C1	0.019	22.3635	51.6162	0.8084	0.7633	0.0475	0.009	0.0597	21.7086	1.3499	0.0182	-0.0137	98.7634	76.37	63.731	0.633368
355	K6_L3C1	0.0202	22.3959	52.4696	0.7617	0.7383	-0.0068	-0.0135	0.1045	21.7497	1.2282	-0.0154	-0.0513	99.468	78.38	63.7552	0.634532
355	K6_L3C1	0.0353	22.19	52.5905	0.6636	0.7199	0.0068	-0.0226	0.1344	21.6722	1.2059	0.0028	-0.0171	99.2214	80.39	63.6448	0.633401
355	K6_L3C1	-0.0278	22.2823	52.2567	0.7854	0.7403	0.0068	-0.0226	0.0568	21.7426	1.2089	-0.014	0.0034	99.0832	82.4	63.6422	0.633621
355	K6_L3C1	0.0316	22.2716	51.8399	0.7643	0.7472	0.0407	0.0158	0.0806	21.7469	1.2184	0.0042	0.0444	98.8058	84.41	63.6177	0.633369
355	K6_L3C1	0.024	22.2956	52.3232	0.7296	0.6347	-0.0204	-0.0248	0.1373	21.8797	1.2314	0.0224	-0.0786	99.278	86.42	63.6542	0.632148
355	K6_L3C1	0.0341	22.2868	52.0755	0.7546	0.6951	-0.0746	0.0338	0.0716	21.7698	1.382	-0.007	0.0137	99.1169	88.43	63.6782	0.631628
355	K6_L3C1	0.019	22.2387	52.0717	0.6916	0.7696	0.0136	-0.0135	0.1553	21.7691	1.2713	-0.007	0.0034	99.0033	90.44	63.5316	0.63226
355	K6_L3C1	0.0114	22.2469	51.8725	0.7355	0.7437	-0.0204	0.0135	0.1254	21.8974	1.0903	0.007	-0.0581	98.7437	92.45	63.4435	0.632901
355	K6_L3C1	0.0101	22.1948	51.8464	0.8365	0.6857	0.0339	0.0023	0.1403	21.7293	1.2318	0.0014	-0.0273	98.7126	94.46	63.6362	0.632607
355	K6_L3C1	0.0063	22.3261	51.9019	0.7416	0.7179	0.0068	0.0023	0.0747	21.9753	1.2746	-0.0154	-0.0342	99.0274	96.47	63.4804	0.631068
355	K6_L3C1	0.0253	22.2923	52.1507	0.7169	0.6801	0.0204	0.0113	0.0806	21.7425	1.3562	-0.0056	-0.0239	99.0762	98.48	63.7314	0.632222
355	K6_L3C1	-0.0038	22.3419	52.3415	0.6303	0.7138	0.0611	-0.0248	0.0866	21.7021	1.2948	0.0126	-0.0684	99.1847	100.49	63.78	0.633772
355	K6_L3C1	0.0013	22.3756	52.1427	0.5216	0.6811	0.0407	0.0023	0.1642	21.5893	1.2908	-0.0014	0.0649	98.8745	102.5	63.9731	0.635302
355	K6_L3C1	0.0038	22.3638	52.1649	0.6883	0.665	0.0204	-0.0135	0.0687	21.8157	1.3431	0.0252	-0.0239	99.1589	104.51	63.7505	0.632364
355	K6_L3C1	0.0202	22.3238	52.546	0.6282	0.692	0.0204	0.0271	0.1105	21.7632	1.3271	0.0014	-0.0855	99.4599	106.52	63.7274	0.632638
355	K6_L3C1	0.0177	22.2312	52.3502	0.7873	0.6183	-0.0204	0.0023	0.0835	21.8701	1.339	0.014	-0.1332	99.3137	108.53	63.6185	0.630476
355	K6_L3C1	0.0076	22.172	52.0435	0.7259	0.7014	0.0204	0.0045	0.0925	21.9283	1.2836	0.0056	-0.0068	98.9852	110.54	63.3889	0.629834
355	K6_L3C1	0.0329	22.1628	52.0939	0.7226	0.7402	-0.0068	-0.0023	0.1374	21.8604	1.3043	0.0211	-0.0137	99.0754	112.55	63.3978	0.630209
355	K6_L3C1	0.0278	22.3042	52.2154	0.728	0.6758	0	-0.0135	0.1105	21.7982	1.2479	-0.0056	0.0991	99.2069	114.56	63.6925	0.632889
355	K6_L3C1	0.0379	22.0487	52.3041	0.8914	0.7203	-0.0271	-0.0135	0.1463	21.8764	1.2742	0.0393	0.0068	99.3454	116.57	63.2876	0.629151
355	K6_L3C1	0.0266	22.1877	51.4653	0.9134	0.6587	0.0407	-0.0045	0.0657	21.9134	1.2805	-0.0028	-0.0034	98.5519	118.58	63.4761	0.63018
355	K6_L3C1	-0.0063	22.1926	51.9317	0.8185	0.6828	0.0068	-0.0113	0.0567	21.8501	1.251	0.0421	-0.0444	98.8322	120.59	63.5143	0.631168
355	K6_L3C1	0.0063	22.2097	52.5095	0.7457	0.6474	-0.0204	0.0316	0.0955	21.9167	1.35	-0.0098	0.0581	99.5705	122.6	63.5105	0.629672
355	K6_L3C1	0.0342	22.2615	51.7843	0.649	0.6649	0.061	0.0383	0.1373	21.9184	1.3825	-0.0407	0	98.9314	124.61	63.5399	0.629869
355	K6_L3C1	0.0088	22.2915	52.8418	0.6422	0.6554	0.0204	-0.0135	0.0567	21.9	1.3928	0.0225	0.0068	99.839	126.62	63.6022	0.630263
355	K6_L3C1	0.0265	22.2692	52.7537	0.53	0.7207	-0.0136	0.0068	0.0747	21.6735	1.2517	0.0491	-0.0547	99.3559	128.63	63.7248	0.633745
355	K6_L3C1	0.0114	22.3819	51.9756	0.5386	0.6567	0.0407	-0.0632	0.0299	21.7344	1.3344	-0.0505	0.0034	98.707	130.64	63.863	0.633458
355	K6_L3C1	-0.0013	22.4154	52.4003	0.4492	0.685	0.0272	-0.0135	0.0866	21.7299	1.1563	-0.0126	0.065	99.0147	132.65	63.8651	0.635669
355	K6_L3C1	0.0126	22.4609	52.5631	0.3478	0.6652	0.0136	-0.0271	0.0567	21.8189	1.2712	0.0253	-0.0171	99.2353	134.66	63.847	0.634069
355	K6_L3C1	0.0038	22.4233	52.6182	0.3984	0.7116	0.0068	0.0023	-0.0119	21.7662	1.3829	-0.0435	0.0034	99.3169	136.67	63.8015	0.633074
355	K6_L3C1	0.024	22.4175	52.8097	0.409	0.6403	-0.0068	0	0.0747	21.6393	1.2155	-0.0505	-0.0547	99.23	138.68	64.0185	0.636001
355	K6_L3C1	-0.0139	22.3789	52.9893	0.4361	0.669	-0.0068	0.0045	0.0717	21.7392	1.2385	0.0197	0.0821	99.6289	140.69	63.8389	0.634356
355	K6_L3C1	0.005	22.3774	53.0635	0.4322	0.6858	-0.0204	0	0.0358	21.7024	1.3699	-0.0084	0.0239	99.6961	142.7	63.853	0.633371
355	K6_L3C1	-0.0051	22.3906	52.6957	0.4599	0.6662	0	-0.0023	0.0597	21.8187	1.2943	0.0225	0.0308	99.4384	144.71	63.7735	0.633109
355	K6_L3C1	-0.0088	22.3943	52.4882	0.5721	0.6036	-0.0611	0.009	0.0358	21.8301	1.271	0.0084	-0.0068	99.2124	146.72	63.8475	0.63327
355	K6_L3C1	0.0088	22.382	52.6109	0.5848	0.6536	0	0.0023	0.1344	21.8232	1.2319	-0.0393	-0.0615	99.4319	148.72	63.7765	0.63361
355	K6_L3C1	0.0025	22.2359	52.429	0.561	0.675	-0.0204	0.018	0.0687	21.7857	1.2744	-0.0337	0.0034	99.0538	150.74	63.6354	0.632032
355	K6_L3C1	0.0568	22.2761	52.8576	0.5698	0.6482	0.0204	0.0338	0.0388	21.9173	1.2447	0.021	-0.0171	99.6846	152.74	63.578	0.631431
355	K6_L3C1	0.0063	22.2518	52.8722	0.6223	0.6476	0.034	-0.0293	0.1075	21.894	1.2288	-0.0477	0.0445	99.7089	154.75	63.5772	0.631573
355	K6_L3C1	0.0114	22.167	52.8943	0.5913	0.6644	-0.0068	-0.0226	0.1344	21.805	1.2681	0.073	0.0513	99.6601	156.77	63.5577	0.63118
355	K6_L3C1	0.0265	22.2781	52.5168	0.5198	0.6351	-0.0204	0.0135	0.0986	21.7703	1.2684	0.0239	-0.0479	99.151	158.77	63.7472	0.632689
355	K6_L3C1	0.0391	22.3546	52.5174	0.478	0.615	-0.0204	0.0045	0.1403	21.7341	1.3793	0.0056	0.0239	99.2919	160.78	63.8898	0.63272
355	K6_L3C1	0.0025	22.3329	52.5059	0.4508	0.6216	-0.0679	-0.0068	0.0538	21.7241	1.2384	0.0014	0.0547	98.986	162.79	63.869	0.634032
355	K6_L3C1	0.0063	22.3633	52.1685	0.451	0.6982	0.0611	0.0316	0.0687	21.7247	1.1921	0.0098	0.0478	98.8231	164.8	63.7994	0.634816
355	K6_L3C1	0.0354	22.2925	52.5661	0.3803	0.6595	0.0475	0.0497	0.0508	21.6847	1.2193	-0.0281	-0.0479	98.9857	166.81	63.8178	0.634206
355	K6_L3C1	0.0177	22.3216	52.9088	0.4611	0.659	-0.0407	-0.009	0.0478	21.7563	1.2743	0.0056	0.0205	99.4727	168.82	63.7753	0.633223
355	K6_L3C1	0.029	22.327	53.2449	0.5099	0.6493	-0.0136	-0.0338	0.1314	21.8716	1.2979	0.0295	-0.0239	100.091	170.83	63.6759	0.63188
355	K6_L3C1	0.024	22.3794	52.066	0.5039	0.5861	-0.0203	-0.0406	0.0835	22.0304	1.3323	-0.0014	-0.0102	99.0057	172.84	63.651	0.63049
355	K6_L3C1	-0.0063	22.2338	53.1528	0.4991	0.6252	-0.0068	-0.0135	0.0687	21.8745	1.2879	-0.0182	-0.0342	99.7419	174.85	63.6077	0.630979
355	K6_L3C1	-0.0063	22.3291	52.8713	0.4937	0.6771	0.0068	-0.0045	0.0657	21.6967	1.1467	-0.0154	-0.0034	99.2871	176.86	63.8203	0.63521
355	K6_L3C1	0.0252	22.3413	52.3906	0.4923	0.6549	0.0136	0.0023	0.1403	21.7551	1.2145	0.0028	0.0649	99.0978	178.87	63.8023	0.634051
355	K6_L3C1	-0.0013	22.3645	52.7712	0.431	0.6689	-0.0204	0.009	0.009	21.837	1.2613	-0.0449	-0.1026	99.3518	180.88	63.7244	0.63299
355	K6_L3C1	0.0328	22.3244	52.1897	0.4329	0.6166	0.0136	0	0.0567	21.6971	1.4314	0.0645	-0.0137	98.8597	182.89	63.8945	0.632247
355	K6_L3C1	0.0404	22.2923	52.8855	0.3982	0.6735	-0.0272	0.0068	0.0687	21.7687	1.2979	0.0379	-0.0615	99.4699	184.9	63.7133	0.632553
355	K6_L3C1	-0.0025	22.3773	53.0256	0.4486	0.6224	0	-0.0541	0.0866	21.8543	1.1923	0.0154	0.0649	99.6875	186.91	63.7807	0.633651
355	K6_L3C1	0.024	22.2757	52.4533	0.3404	0.6349	-0.0407	-0.0203	0.0508	21.7163	1.3237	0.0042	-0.0068	98.8232	188.92	63.8003	0.632644
355	K6_L3C1	0.0051	22.3304	52.595	0.3839	0.6339	-0.0272	-0.009	0.1045	21.8997	1.2679	-0.0519	-0.0034	99.2205	190.93	63.6709	0.631938
355	K6_L3C1	0.024	22.4114	52.4546	0.3696	0.6314	0.0543	-0.0541	0.0358	21.903	1.1889	-0.0238	0	99.073	192.94	63.7545	0.63355
355	K6_L3C1	0.005	22.2626	53.5533	0.4425	0.6575	-0.0408	-0.0135	0.0896	21.7997	1.2025	-0.0056	0.041	100.054	194.95	63.6717	0.632904
355	K6_L3C1	-0.0038	22.3249	52.8399	0.5316	0.6527	-0.0272	0.009	0.1194	21.7371	1.235	0.0211	0.0171	99.4877	196.96	63.8066	0.633853
355	K6_L3C1	0.0492	22.3152	52.7435	0.503	0.6633	0.0339	0.009	0.0926	21.8805	1.2315	0.0477	0.0273	99.5968	198.97	63.6364	0.632343
355	K6_L3C1	-0.0101	22.3057	52.8975	0.5516	0.6456	0.0339	0.009	0.0567	21.8321	1.2613	0.014	-0.0171	99.6075	200.98	63.699	0.632427
355	K6_L3C1	-0.0088	22.3406	53.0464	0.4813	0.6615	0.0136	0.0271	0.1075	21.9938	1.2345	0.0014	0.1128	100.02	202.99	63.5499	0.63144
355	K6_L3C1	0.0139	22.3072	52.6158	0.5359	0.6556	0.0272	-0.0429	-0.009	21.9137	1.3403	0.0112	0.0034	99.4241	205	63.6043	0.630821
355	K6_L3C1	-0.0013	22.3147	52.9265	0.5083	0.6262	-0.0475	-0.0361	0.0358	21.8236	1.2748	-0.014	0.0137	99.5236	207.01	63.7423	0.632469
355	K6_L3C1	0.0013	22.2364	52.4627	0.485	0.6522	0.0339	0.0135	0.1014	21.8753	1.339	0.0294	0.0649	99.2951	209.02	63.5743	0.630479
355	K6_L3C1	0.0202	22.294	52.2795	0.3697	0.6404	-0.0204	0.018	0.0986	21.7795	1.2123	-0.0014	-0.0376	98.7121	211.03	63.7474	0.633335
355	K6_L3C1	0.0265	22.3281	52.9416	0.4054	0.6519	-0.0339	0.0023	0.0478	21.9642	1.2285	-0.0098	0.0034	99.5996	213.04	63.5795	0.631668
355	K6_L3C1	0.0126	22.2805	53.2745	0.5131	0.6502	0	-0.0271	0.1075	21.8043	1.232	0.0463	0	99.9211	215.05	63.6952	0.632743
355	K6_L3C1	0.0455	22.3183	52.7849	0.4669	0.6768	-0.0204	0.009	0.009	21.8068	1.2972	0.0224	-0.0479	99.4369	217.06	63.697	0.632447
355	K6_L3C1	0.0253	22.3028	52.6955	0.5447	0.6595	-0.0339	0.0271	0.1015	21.9788	1.2507	-0.0182	-0.0615	99.5859	219.07	63.5285	0.631032
355	K6_L3C1	0.0341	22.2101	52.9789	0.5155	0.6233	0.0204	0.0135	0.0537	21.9311	1.2809	-0.0182	0.0376	99.699	221.08	63.5277	0.630234
355	K6_L3C1	0.0139	22.2313	52.5863	0.5649	0.6177	0.0543	0	0.0866	22.0174	1.297	-0.0098	0.0615	99.5309	223.09	63.4693	0.629428
355	K6_L3C1	-0.0088	22.3112	52.464	0.5089	0.6268	0.0136	-0.0361	0.0149	21.8239	1.3663	-0.0309	0.0273	99.1569	225.1	63.7376	0.631499
355	K6_L3C1	0.0025	22.3179	52.6239	0.5557	0.6669	-0.0068	0.018	0.1463	21.8456	1.2611	0.0014	0.1025	99.5418	227.11	63.67	0.632421
355	K6_L3C1	0.0152	22.2266	52.8371	0.5265	0.6776	0.0136	-0.0293	0.1612	21.9552	1.2546	-0.0323	0.0855	99.7532	229.12	63.4496	0.630432
355	K6_L3C1	0.0127	22.2886	52.4357	0.4764	0.6507	0.0407	0.0045	0.1403	21.942	1.2345	-0.0042	-0.0991	99.2261	231.13	63.5626	0.631417
355	K6_L3C1	0.0076	22.2465	52.6236	0.5355	0.6922	0.0407	-0.0338	0.1105	21.7651	1.196	-0.0393	-0.0137	99.2177	233.14	63.6449	0.633152
355	K6_L3C7_1	0.0701	0.1249	0.2245	0.0252	0.0827	-0.0124	0.0253	-0.0028	0.5445	-0.0124	0.0077	-0.0165	1.105	0	25.5002	0.295052
355	K6_L3C7_1	0.0534	0.054	0.0887	0.0396	0.0497	-0.0243	0.029	-0.0387	0.4573	0.0122	0.0038	-0.0751	0.7876	2.05	15.5951	0.170093
355	K6_L3C7_1	0.0406	0.4132	0.2232	0.0731	0.0302	-0.025	0.0318	0.0305	0.9396	0.0124	0.0214	0.0066	1.8226	4.1	42.9515	0.436162
355	K6_L3C7_1	0.062	11.0483	26.1838	0.4216	0.511	0.0133	0.0575	0.0349	19.1485	0.7687	-0.0121	0.0676	58.3172	6.14	49.862	0.497062
355	K6_L3C7_1	0.0346	16.9492	50.2386	0.292	0.7464	-0.0202	-0.0022	0.159	27.0682	1.0681	-0.0165	0.0543	96.6104	8.19	51.8788	0.517673
355	K6_L3C7_1	0.0161	16.5253	49.3209	0.52	0.6079	0.0067	0.0379	0.1792	27.8971	1.047	-0.0109	0.0407	96.1988	10.24	50.672	0.504277
355	K6_L3C7_1	0.0805	15.5087	48.368	0.6484	0.4562	0.0201	0.0335	0.1234	27.0844	1.0695	-0.041	-0.112	93.3926	12.29	49.9785	0.495319
355	K6_L3C7_1	0.0857	14.7894	48.4148	0.7461	0.3387	-0.0067	0.0823	0.1638	29.2205	0.94	-0.0054	-0.0745	94.7814	14.33	47.062	0.466308
355	K6_L3C7_1	0.041	15.0841	48.308	1.0173	0.3819	0.0334	-0.0222	0.251	30.794	0.8705	0.0338	0.0068	96.8218	16.38	46.2223	0.459126
355	K6_L3C7_1	0.0614	15.1395	48.5874	1.8801	0.6371	0.0668	0.1733	0.1958	30.6593	1.1005	0.0135	-0.0542	98.5146	18.43	46.1611	0.459268
355	K6_L3C7_1	-0.0026	19.5555	50.3446	0.8954	0.6529	0	0.0224	0.133	26.0216	1.2507	0.0028	-0.0136	98.8787	20.48	56.4817	0.560907
355	K6_L3C7_1	0.0165	22.2804	51.2116	0.8203	0.6395	0	-0.0045	0.0328	22.2759	1.1186	0.0084	-0.0171	98.4039	22.52	63.2307	0.629166
355	K6_L3C7_1	-0.0038	22.5409	51.5201	0.8656	0.6159	-0.0136	-0.009	0.1015	21.9337	1.2083	-0.0084	-0.0376	98.786	24.57	63.8766	0.634382
355	K6_L3C7_1	0.0013	22.4517	50.9012	0.951	0.6043	0	0.0248	0.1311	21.9117	1.2557	0.0406	-0.1297	98.2733	26.62	63.8225	0.633201
355	K6_L3C7_1	0.0341	22.4364	51.5173	0.9178	0.6517	0.0136	0.0383	0.0687	21.9645	1.1361	-0.0168	-0.0444	98.7784	28.67	63.6914	0.633728
355	K6_L3C7_1	-0.0126	22.4932	51.4462	0.9505	0.6773	0.0339	-0.0158	0.1104	22.0676	1.1456	0.0336	-0.0171	98.9583	30.72	63.6124	0.633186
355	K6_L3C7_1	0.0114	22.5316	51.3679	0.9007	0.5839	0.0136	-0.018	0.1194	22.042	1.0968	-0.0463	0.0581	98.7253	32.76	63.7988	0.634332
355	K6_L3C7_1	0.0013	22.5119	51.7939	0.8472	0.6731	0.0339	0.0225	0.1254	22.0429	1.1952	0.0056	-0.0889	99.2529	34.81	63.662	0.633123
355	K6_L3C7_1	0.0152	22.4408	51.043	0.8986	0.7021	0.0271	0.0203	0.1044	22.0395	1.2274	0.0196	0.0171	98.5551	36.86	63.5547	0.632096
355	K6_L3C7_1	0.0228	22.3916	51.4737	0.8562	0.6575	-0.0068	0.0158	0.1283	22.0216	1.257	-0.0308	-0.0512	98.8245	38.91	63.5797	0.631465
355	K6_L3C7_1	0.0063	22.3849	51.4124	0.8272	0.6138	0	0.0023	0.1074	21.929	1.27	0.0126	-0.0581	98.5658	40.95	63.7237	0.63219
355	K6_L3C7_1	0	22.3435	51.8024	0.8247	0.6871	-0.0271	-0.0045	0.1492	22.0196	1.2179	0.0168	0.0615	99.1225	43	63.4936	0.631381
355	K6_L3C7_1	0.0253	22.492	51.9735	0.8844	0.6507	0.0136	0.0203	0.0746	22.0016	1.1556	-0.0084	0.0513	99.3427	45.05	63.7123	0.633732
355	K6_L3C7_1	0.0353	22.3107	51.7194	0.7842	0.7237	0.0339	-0.018	0.0507	21.8056	1.1751	-0.0014	-0.0342	98.6387	47.1	63.6292	0.633626
355	K6_L3C7_1	-0.0051	22.3875	51.3338	0.7418	0.7254	-0.0068	0.0158	0.0895	21.8055	1.3098	0.0014	0.0068	98.4172	49.14	63.7065	0.633051
355	K6_L3C7_1	0.0038	22.3819	51.5929	0.9011	0.7407	-0.0339	-0.0135	0.0836	21.9443	1.3035	0.0337	0.0308	99.0161	51.19	63.5401	0.631666
355	K6_L3C7_1	0.0253	21.7685	50.1771	0.7823	2.1691	1.1058	0	0.0209	21.4185	1.1601	0.0014	0.0239	98.6529	53.24	61.5919	0.63201
355	K6_L3C7_1	0.0893	5.2549	10.5993	0.1591	43.1322	33.9894	0.0042	0.0222	5.7017	0.4708	-0.0045	0	99.423	55.29	13.3191	0.602557
355	K6_L3C7_1	0.1066	0.2903	0.6446	-0.0016	53.4131	43.095	0.0103	-0.0032	1.3324	0.2096	0.0107	0.0476	99.1602	57.34	0.736295	0.250939
355	K6_L3C7_1	0.1693	0.751	1.1878	0.0315	52.64	42.3313	-0.0268	-0.0064	1.5319	0.2569	-0.0213	-0.0748	98.8997	59.38	1.90396	0.427592
355	K6_L3C7_1	0.1278	2.5771	4.8884	0.0796	48.8679	41.1332	-0.0125	0.0223	3.1101	0.3071	-0.0167	0.0952	101.209	61.43	6.53349	0.573156
355	K6_L3C7_1	0.0957	5.905	11.6464	1.0995	40.7163	33.1109	0.0148	0.0631	6.7898	0.5738	0.0315	-0.0442	100.047	63.48	15.1496	0.588145
355	K6_L3C7_1	0.0807	13.8957	32.553	0.9295	17.6585	19.1827	0.0022	0.0399	14.9407	0.9836	0.0102	0.0136	100.29	65.53	39.7372	0.608495
355	K6_L3C7_1	0.0291	20.9899	48.8571	0.7299	2.7106	3.519	0.0202	0.1139	21.1796	1.2693	0.0169	0.0273	99.4628	67.57	60.2817	0.624835
355	K6_L3C7_1	0.0025	22.135	51.5356	0.6533	1.0121	0.5078	0.0135	0.1075	21.735	1.317	-0.0239	0.0239	99.0432	69.62	63.1425	0.63105
355	K6_L3C7_1	-0.0076	22.2145	51.9022	0.7288	0.798	0.0474	-0.0158	0.1581	21.7595	1.2369	-0.0028	0.0034	98.8488	71.67	63.4791	0.632456
355	K6_L3C7_1	0.043	22.2275	51.1469	0.7474	0.774	0.0271	0	0.1433	21.7466	1.1134	0	0.041	98.0103	73.72	63.5371	0.633988
355	K6_L3C7_1	0.0139	22.2645	51.8348	0.8101	0.739	0.0136	-0.0203	0.1134	21.9715	1.1852	0.0154	0.1128	99.0742	75.76	63.3928	0.631371
355	K6_L3C7_1	0.0126	22.394	51.4281	0.789	0.7333	0.0136	0.0113	0.0956	21.6801	1.002	-0.0098	-0.0752	98.1597	77.81	63.8307	0.637539
355	K6_L3C7_1	0.0417	22.3824	51.7894	0.696	0.7463	-0.0136	0.009	0.1135	21.6436	1.2677	0.0196	-0.082	98.7091	79.86	63.839	0.635059
355	K6_L3C7_1	0.0265	22.3987	52.0697	0.7679	0.7153	-0.0475	-0.0068	0.1225	21.7696	1.1926	0.0056	-0.0034	99.0685	81.91	63.7678	0.634724
355	K6_L3C7_1	0.0493	22.3948	51.6033	0.7216	0.704	0.0678	0.0068	0.0865	21.8327	1.3394	-0.0042	0.0137	98.8198	83.96	63.7143	0.632554
355	K6_L3C7_1	0.0152	22.372	51.3983	0.6674	0.7051	-0.0136	-0.018	0.1015	21.7072	1.1885	0.0252	-0.0513	98.1803	86	63.8172	0.63512
355	K6_L3C7_1	0.0367	22.3691	51.6556	0.6239	0.7575	-0.0068	0.0113	0.1015	22.0187	1.1192	0.021	0.0683	98.7828	88.05	63.4299	0.632658
355	K6_L3C7_1	0.0266	22.1515	51.602	0.884	0.7464	0.0678	0.0338	0.1433	21.8393	1.1857	0.0042	0.0479	98.7324	90.1	63.3993	0.631513
355	K6_L3C7_1	0.0025	22.2372	51.9586	0.755	0.715	0.0271	-0.0158	0.0716	21.8128	1.2379	-0.0182	-0.0205	98.8178	92.15	63.5568	0.632145
355	K6_L3C7_1	-0.0038	22.4584	51.8091	0.62	0.6705	0.0611	-0.0474	0.0866	21.7549	1.2118	0.0309	-0.041	98.7032	94.19	63.9027	0.635293
355	K6_L3C7_1	-0.0202	22.4183	51.526	0.6366	0.7515	-0.0136	-0.0113	0.0896	21.792	1.2314	0.0252	0.0205	98.4911	96.24	63.7181	0.634305
355	K6_L3C7_1	0.0316	22.3761	51.4963	0.7235	0.7647	0.0407	-0.0113	0.1522	21.8058	1.333	-0.0252	-0.0273	98.7238	98.29	63.6433	0.632694
355	K6_L3C7_1	-0.0063	22.3435	52.4208	0.6928	0.7241	0.0339	-0.0045	0.0567	21.6627	1.2449	0	-0.0103	99.1794	100.34	63.8084	0.634697
355	K6_L3C7_1	0.0316	22.3901	52.0122	0.7703	0.6937	-0.0068	-0.0068	0.1045	21.7981	1.2843	-0.0323	0.0889	99.1737	102.38	63.7581	0.633412
355	K6_L3C7_1	0.0341	22.4887	51.9281	0.6545	0.6982	0.0068	-0.0271	0.1553	21.8129	1.2088	0.0351	0.0103	99.0327	104.43	63.8387	0.635052
355	K6_L3C7_1	0.0038	22.3771	51.2668	0.6169	0.677	0.0271	-0.018	0.1521	21.9088	1.28	-0.0252	0.0034	98.313	106.48	63.6538	0.63221
355	K6_L3C7_1	0.0189	22.4443	51.9154	0.6831	0.7345	-0.0068	0.0338	0.194	21.7355	1.2347	-0.0351	0.0683	99.0626	108.53	63.8245	0.635109
355	K6_L3C7_1	0.0227	22.4276	51.8041	0.7523	0.7151	0.0068	0	0.1374	21.8063	1.2318	-0.0126	-0.0068	98.904	110.58	63.7605	0.634253
355	K6_L3C7_1	-0.0063	22.3	51.6211	0.6762	0.7319	0.0068	0.0451	0.0895	21.8823	1.2379	0.0463	0.0103	98.6474	112.62	63.5294	0.632101
355	K6_L3C7_1	0.0126	22.4207	52.0836	0.656	0.6635	-0.0204	-0.009	0.0717	21.6885	1.245	0.014	-0.0615	98.8556	114.67	63.941	0.635234
355	K6_L3C7_1	0.0139	22.4712	52.0969	0.6434	0.6894	0.0204	0.0023	0.0986	21.7019	1.2319	-0.0295	0.0513	99.0211	116.72	63.9453	0.635754
355	K6_L3C7_1	-0.0063	22.4003	51.7933	0.6107	0.6989	-0.0204	0.0248	0.1343	21.714	1.2577	0.0098	0.0308	98.6746	118.77	63.8476	0.634636
355	K6_L3C7_1	0	22.3596	53.0229	0.6689	0.7022	-0.0272	0	0.0956	21.6859	1.206	0.0126	-0.0581	99.7537	120.81	63.83	0.635027
355	K6_L3C7_2	0.1477	0.4647	0.2503	1.2681	0.1888	0.0393	0.0554	0.012	0.4254	0.0395	0.0388	-0.0136	2.93	0	55.3846	0.640269
355	K6_L3C7_2	0.1109	1.3376	0.6398	0.1583	0.1341	0.0065	0.048	-0.0116	1.1947	0.0192	0	0.0202	3.6693	2.07	63.5681	0.662596
355	K6_L3C7_2	0.2379	15.8461	35.7529	0.4942	0.8189	0.0667	0.1488	0.1289	23.2053	0.9412	0.0054	0.0203	77.6668	4.13	53.8019	0.539004
355	K6_L3C7_2	0.0279	17.1524	50.6424	0.2341	1.0377	0.0202	0.0291	0.1682	26.7135	1.0635	0.0151	-0.0034	97.104	6.2	52.1598	0.523854
355	K6_L3C7_2	0.0308	17.296	49.6639	0.2877	0.8426	-0.0201	0.0401	0.1352	28.0337	1.1057	0.0191	0.0272	97.482	8.26	51.4328	0.513983
355	K6_L3C7_2	0.0229	17.183	49.8868	0.3206	0.6654	0	0.0045	0.0939	29.1391	1.0036	-0.0286	-0.0407	98.3197	10.33	50.5262	0.5039
355	K6_L3C7_2	0.0597	16.5547	49.0031	0.4695	0.5494	0.0134	0.0044	0.1316	30.2135	0.9007	-0.0149	-0.0576	97.9	12.39	48.8352	0.486674
355	K6_L3C7_2	0.0027	15.3861	48.2184	0.9637	0.4062	-0.0133	0.0422	0.1983	31.4036	0.9857	-0.0351	-0.0609	97.6069	14.46	46.2111	0.45842
355	K6_L3C7_2	0.0069	14.1697	47.557	1.6375	0.3081	0.06	-0.0199	0.1337	32.4647	1.1117	-0.0148	-0.0372	97.4493	16.52	43.4605	0.429205
355	K6_L3C7_2	0.0252	12.8208	46.3841	2.6643	0.398	0.0133	-0.0442	0.1998	33.7757	1.1662	0	0.0641	97.5114	18.59	39.9965	0.395321
355	K6_L3C7_2	0.0761	11.3399	45.8984	4.2128	0.5071	-0.0133	0.0154	0.3151	34.5328	1.1676	0.0453	0.0876	98.198	20.66	36.4896	0.36142
355	K6_L3C7_2	0.0099	11.5306	45.0287	4.5711	0.5671	-0.0398	0.0375	0.1792	34.7309	1.2025	-0.0333	0.0404	97.8979	22.72	36.696	0.363769
355	K6_L3C7_2	0.0148	15.7441	48.3087	2.847	0.7444	0.0535	0.0111	0.1318	29.3576	1.2902	0.0027	-0.0136	98.506	24.79	48.0757	0.477868
355	K6_L3C7_2	0.0334	20.9511	50.8743	0.6725	0.7837	-0.0203	-0.0067	0.1159	23.5173	1.2465	-0.0348	0.0648	98.2594	26.85	60.3649	0.601139
355	K6_L3C7_2	0.0228	22.1197	51.9326	0.7117	0.7569	-0.0068	-0.0023	0.1403	21.9258	1.1822	-0.0463	0.0171	98.809	28.92	63.2643	0.630342
355	K6_L3C7_2	0.0164	22.1901	51.5807	0.5636	0.7093	0.0678	0.0068	0.1373	21.8166	1.1618	0.0308	-0.0717	98.2811	30.98	63.5112	0.632392
355	K6_L3C7_2	-0.0038	22.0966	51.9841	0.6664	0.7931	0.0339	0.0023	0.1194	22.005	1.2966	-0.0266	-0.0547	98.9973	33.05	63.1128	0.628138
355	K6_L3C7_2	0.0177	22.1406	51.7427	0.6667	0.7929	0.0136	-0.0158	0.1462	22.0908	1.2864	-0.0028	-0.0137	98.8975	35.11	63.0728	0.627848
355	K6_L3C7_2	0.0253	22.106	51.7095	0.6108	0.7525	0.0271	-0.0045	0.0866	22.0085	1.146	-0.0168	0.0171	98.4894	37.18	63.1718	0.629733
355	K6_L3C7_2	0.0494	22.1229	51.6144	0.5276	0.7638	0.0542	-0.009	0.1164	21.8615	1.2935	-0.0308	0.0683	98.4721	39.25	63.324	0.629888
355	K6_L3C7_2	0.0076	22.1092	52.1304	0.6209	0.7695	-0.0136	-0.0338	0.1164	21.8623	1.2973	0.0042	-0.0239	98.9177	41.31	63.3014	0.629696
355	K6_L3C7_2	0.0202	22.16	52.0664	0.5414	0.7925	0.0814	-0.018	0.0866	21.9	1.3265	0.0238	0.0239	99.0227	43.38	63.2865	0.629556
355	K6_L3C7_2	0.0139	22.12	52.5588	0.6278	0.7588	0.0407	0.0113	0.1194	22.0799	1.1725	-0.0323	0.0137	99.5167	45.44	63.1062	0.628894
355	K6_L3C7_2	0.0051	22.0199	51.8198	0.5905	0.7611	-0.0203	0.009	0.1641	21.9519	1.287	-0.0182	0.0308	98.6391	47.51	63.1272	0.627956
355	K6_L3C7_2	0.0165	22.13	51.6213	0.6323	0.7789	-0.0203	-0.0068	0.0806	21.9617	1.2144	0.0028	-0.0034	98.4384	49.57	63.2102	0.62976
355	K6_L3C7_2	0.0076	22.0902	51.7507	0.6448	0.7748	-0.0136	-0.0248	0.0746	21.8873	1.1953	-0.0042	-0.0103	98.4254	51.64	63.2491	0.630285
355	K6_L3C7_2	0.019	22.1446	52.088	0.6374	0.7541	0.0136	-0.0135	0.0895	21.9866	1.2115	0.0322	0.0273	99.0038	53.7	63.2325	0.629694
355	K6_L3C7_2	0.0266	22.1092	51.7036	0.6288	0.8273	0.0271	-0.027	-0.0179	21.9534	1.264	-0.0126	-0.0513	98.54	55.77	63.1339	0.62912
355	K6_L3C7_2	0.0152	22.0952	52.0474	0.6625	0.7844	0.0542	0.0203	0.0985	21.9316	1.2211	0.028	-0.0752	98.9584	57.84	63.1969	0.629628
355	K6_L3C7_2	0.0329	22.0568	52.3517	0.6642	0.7384	0.0136	-0.0203	0.0806	22.0318	1.1823	0.014	-0.0479	99.1663	59.9	63.1146	0.62861
355	K6_L3C7_2	0.0405	22.0375	52.1297	0.6515	0.7533	-0.0204	0	0.0358	21.832	1.3167	0.0196	0.0308	98.8475	61.97	63.2779	0.629046
355	K6_L3C7_2	0.0177	22.0532	51.7656	0.7006	0.7855	-0.0068	0.0135	0.0746	21.8348	1.1559	0.0168	0.0068	98.4252	64.03	63.2496	0.630828
355	K6_L3C7_2	0.0114	22.1386	52.519	0.5718	0.7908	0.0475	-0.0023	0.1224	21.987	1.2379	0.0421	0.0683	99.5366	66.1	63.1782	0.629358
355	K6_L3C7_2	-0.0051	22.1192	52.3924	0.6767	0.774	0.0271	-0.009	0.0836	21.942	1.248	0.0365	-0.041	99.2995	68.16	63.2252	0.629503
355	K6_L3C7_2	-0.0063	22.0875	52.0018	0.6629	0.7515	0	-0.0068	0.1493	21.9039	1.2806	0.0295	-0.0923	98.867	70.23	63.2598	0.629219
355	K6_L3C7_2	0.0531	22.1179	51.6745	0.7336	0.7737	0.0543	-0.009	0.1313	21.8368	1.2345	0.007	0.0615	98.6783	72.29	63.331	0.630686
355	K6_L3C7_2	0.0025	22.0748	52.1417	0.7818	0.8072	0.0271	0.0248	0.1165	21.9286	1.1759	0.0112	0.0342	99.1264	74.36	63.1489	0.629904
355	K6_L3C7_2	0.0139	22.0396	52.2155	0.8663	0.7379	0.0543	0.0135	0.1761	21.9952	1.3297	0.021	-0.0205	99.4629	76.42	63.1342	0.627297
355	K6_L3C7_2	0.0292	22.0843	51.1598	0.7182	0.7456	0.0136	0.018	0.1312	22.037	1.2305	0.0168	0.0512	98.2354	78.49	63.129	0.628358
355	K6_L3C7_2	0.0127	22.0424	51.7613	0.7824	0.7386	-0.0136	0	0.0865	22.0111	1.2764	-0.0126	-0.1059	98.7114	80.56	63.1202	0.627708
355	K6_L3C7_2	0.0139	22.0947	52.0882	0.764	0.7505	-0.061	-0.0316	0.1492	22.1028	1.218	-0.0154	0.0615	99.2429	82.62	63.0671	0.627936
355	K6_L3C7_2	0.0228	21.9358	51.755	0.8472	0.7532	0	0.0135	0.1164	22.0068	1.1687	0.0463	0.0376	98.7034	84.69	62.9926	0.627715
355	K6_L3C7_2	0.0443	22.0158	51.9991	0.6606	1.0158	0.1356	-0.0315	0.0866	21.8399	1.2544	-0.0281	-0.123	99.052	86.75	62.906	0.629373
355	K6_L3C7_2	0.0277	21.6818	51.3778	0.7451	1.4505	0.6428	-0.0045	0.1496	21.2369	1.1376	0.0113	0.0034	98.4645	88.82	62.5953	0.633195
355	K6_L3C7_2	-0.0076	22.1228	51.9559	0.7494	0.7276	0	-0.0383	0.0836	21.8215	1.2085	-0.0126	-0.0137	98.6691	90.88	63.4119	0.631158
355	K6_L3C7_2	-0.0076	22.0756	51.7607	0.7463	0.7465	0.0204	0.0158	0.0627	21.9364	1.0707	-0.0168	-0.0342	98.435	92.95	63.2207	0.63091
355	K6_L3C7_2	0.0076	22.0448	51.8471	0.7745	0.7871	0.0407	0.009	0.1254	21.9037	1.1556	-0.0084	0.0342	98.7296	95.01	63.1686	0.630046
355	K6_L3C7_2	0.0405	22.0433	52.423	0.7778	0.7802	-0.0068	0.0113	0.1762	21.9791	1.2712	0.0154	-0.0171	99.518	97.08	63.0995	0.628092
355	K6_L3C7_2	0.019	21.8489	52.2788	0.8905	0.8076	-0.0407	-0.0068	0.2239	21.8779	1.2084	0.0225	0	99.1775	99.15	62.9602	0.627683
355	K6_L3C7_2	0.0127	22.07	51.908	0.7696	0.7464	0.0339	-0.0293	0.0985	22.0871	1.1034	0.0056	0.0205	98.8557	101.21	63.0622	0.628997
355	K6_L3C7_2	0.0076	22.0589	52.817	0.7354	0.7623	0.0136	0.009	0.1015	21.9817	1.2576	-0.0365	0.0273	99.7719	103.28	63.1366	0.628369
355	K6_L3C7_2	0.024	22.0605	52.046	0.7223	0.7553	0.0339	0.0045	0.1344	21.9325	1.2153	0.0238	-0.0103	98.9525	105.34	63.1973	0.629311
355	K6_L3C7_2	0.0063	21.9927	52.0694	0.7126	0.7486	0.0271	-0.0225	0.1074	21.8254	1.3065	0.0098	-0.0307	98.8058	107.41	63.2435	0.628742
355	K6_L3C7_2	0.0303	22.0895	52.314	0.6964	0.7711	-0.061	0.0158	0.1015	21.8588	1.3264	0.0182	0.041	99.2631	109.47	63.2822	0.629227
355	K6_L3C7_2	0.0051	22.0051	52.3921	0.7557	0.7959	0.0068	-0.0023	0.0746	22.0405	1.1783	-0.0561	0.0478	99.3018	111.54	62.9766	0.628015
355	K6_L3C7_2	0.0531	22.1151	52.2986	0.7416	0.8155	0.0068	0.0135	0.1194	21.998	1.2671	0.0056	0.0171	99.4512	113.6	63.1104	0.628703
355	K6_L3C7_2	0.0164	22.0338	52.3349	0.7216	0.7898	-0.0136	0.0203	0.0866	21.8627	1.3296	-0.0379	0.0615	99.2571	115.67	63.1952	0.628566
355	K6_L3C7_2	0.0405	22.0494	52.0378	0.6911	0.8072	0.0678	-0.0113	0.1044	22.0195	1.2436	-0.0028	0.0444	99.1057	117.74	63.0301	0.628031
355	K6_L3C7_2	-0.0203	22.0632	51.7996	0.7731	0.7619	0.0068	-0.0135	0.1074	22.0367	1.2472	0.0056	-0.0102	98.8014	119.8	63.086	0.627968
355	K6_L3C7_2	-0.0088	22.0664	52.1784	0.7631	0.8201	0.0068	0.0473	0.0985	21.9908	1.1359	-0.0056	0	99.1074	121.87	63.0603	0.629597
355	K6_L3C7_2	0.0278	22.0287	52.0007	0.8343	0.7273	-0.0136	0.009	0.1791	22.0154	1.2412	0.007	-0.0034	99.0707	123.93	63.116	0.627877
355	K6_L3C7_2	0.0177	22.0451	51.9009	0.7744	0.7546	-0.0407	-0.009	0.0895	21.9355	1.2896	-0.0252	0.0376	98.8448	126	63.1789	0.628361
355	K6_L3C7_2	-0.0013	22.0163	52.6085	0.8309	0.7517	0.0204	0.0158	0.1762	21.7997	1.1726	0.007	0.0478	99.4469	128.06	63.2906	0.630622
355	K6_L3C7_2	0.024	21.9842	51.981	0.7848	0.7556	0.0136	-0.0068	0.176	21.9257	1.1717	-0.0112	-0.0137	98.8166	130.13	63.1232	0.629017
355	K6_L3C7_2	0.0164	22.1416	52.0923	0.8434	0.7729	0.0339	-0.0316	0.0657	22.0719	1.0964	-0.0098	-0.0683	99.1344	132.19	63.1187	0.629976
355	K6_L3C7_2	0.0101	21.8684	51.5764	0.7943	0.7451	0.0474	-0.0045	0.1371	22.0266	1.2657	-0.007	0.0785	98.5496	134.26	62.9113	0.625807
355	K6_L3C7_2	0.019	21.9937	51.9698	0.7796	0.7848	0.0271	-0.0158	0.1133	22.0123	1.2698	-0.0238	0.0307	99.0003	136.32	63.0074	0.627246
355	K6_L3C7_2	0.0038	21.962	52.1501	0.7701	0.7528	0	-0.009	0.2088	21.9388	1.2504	-0.035	0.0137	99.0504	138.39	63.09	0.627845
355	K6_L3C7_2	0.0127	21.932	52.2615	0.7919	0.7477	0.0136	-0.0203	0.1134	22.0656	1.1749	-0.0098	0.0478	99.161	140.46	62.9361	0.627019
355	K6_L3C7_2	0.0126	21.9546	52.0844	0.734	0.7342	0	-0.0293	0.1969	21.8988	1.1816	-0.0112	0.0171	98.8141	142.52	63.1471	0.628873
355	K6_L3C7_2	0.0291	21.693	48.8477	2.1801	0.8376	0.0135	0.018	0.6324	21.2829	1.1979	0.0491	0.0034	96.7848	144.59	63.3658	0.632206
355	K6_L3C7_2	0.0877	19.7309	47.6886	10.1471	0.7024	0.0136	0.0407	0.1199	19.5123	1.0932	0.0226	0.0684	99.2274	146.65	63.2766	0.630415
355	K6_L3C7_2	0.0088	21.7725	52.2827	1.49	0.7291	0.0136	-0.0068	0.0657	21.9197	1.2443	-0.0337	-0.0034	99.5263	148.72	62.9384	0.626073
355	K6_L3C7_2	0.0228	21.9492	52.1208	0.7382	0.7569	-0.0339	0.0135	0.1164	22.0016	1.2214	-0.0112	-0.0513	98.9408	150.78	63.0073	0.627373
355	K6_L3C7_2	0.0228	22.0067	52.2705	0.781	0.7326	0.0068	-0.0158	0.1343	21.9249	1.1686	0.0154	-0.0444	99.0636	152.85	63.1778	0.629295
355	K6_L3C7_2	0.0177	22.0363	51.9823	0.6917	0.7326	-0.0204	0.009	0.1045	21.9399	1.2079	-0.0365	-0.1128	98.7219	154.92	63.1938	0.629056
355	K6_L3C7_2	-0.0076	22.0616	52.2084	0.7001	0.7275	-0.0068	-0.0068	0.0328	21.8228	1.2378	-0.0056	-0.0615	98.7911	156.98	63.3464	0.6302
355	K6_L3C7_2	0.024	22.128	51.9398	0.6155	0.6975	0.0068	0.0068	0.1432	21.8882	1.3159	-0.0028	0.0342	98.7998	159.05	63.3887	0.629445
355	K6_L3C7_2	0.0228	22.1255	52.4243	0.7217	0.7352	-0.0203	0.0023	0.1044	21.9086	1.4708	0.0098	0.0102	99.5356	161.11	63.3161	0.627643
355	K6_L3C7_2	0.0177	22.116	53.0761	0.6337	0.7143	0.0475	0.0248	0.0478	21.7784	1.2118	-0.014	-0.0273	99.6681	163.18	63.4662	0.631488
355	K6_L3C7_2	0.0164	22.1024	52.4349	0.5931	0.7179	0.0611	-0.0158	0.0358	21.6997	1.2218	-0.0253	0.0273	98.9105	165.24	63.5277	0.632039
355	K6_L3C7_2	-0.0013	22.2084	52.2671	0.644	0.7263	0.0407	0.0225	0.1253	21.8633	1.2441	-0.0056	-0.0205	99.1417	167.31	63.4606	0.631272
355	K6_L3C7_2	0.0063	22.2339	52.4535	0.6693	0.7621	-0.0339	-0.009	0.0179	21.8686	1.3362	-0.0715	-0.0307	99.3478	169.37	63.4352	0.630548
355	K6_L3C7_2	-0.0038	22.008	52.9475	0.6716	0.7892	0	0.0248	0.0179	21.8765	1.1525	-0.0154	-0.0376	99.488	171.44	63.1547	0.629963
355	K6_L3C7_2	0.043	22.0856	53.1127	0.645	0.6786	0.0339	-0.0045	0.0746	22.0167	1.1329	-0.0379	-0.0718	99.823	173.51	63.238	0.629569
355	K6_L3C7_2	0.0265	21.916	53.2474	0.7611	0.688	0	-0.009	0.1821	21.9285	1.2278	0.007	0.0478	100.032	175.57	63.1363	0.62769
355	K6_L3C7_2	0.0152	22.0359	52.8725	0.665	0.6972	0.0136	-0.0248	0.1433	21.7814	1.3203	-0.0576	0.0957	99.6401	177.64	63.4013	0.629502
355	K6_L3C7_2	0.0417	22.0184	52.6135	0.6887	0.7175	-0.0204	0.027	0.0895	21.9244	1.2769	-0.0112	0.0957	99.4934	179.7	63.2104	0.628319
355	K6_L3C7_2	-0.0038	21.977	53.1923	0.7524	0.688	0.0136	-0.027	0.1044	21.8695	1.4282	0.0196	-0.0171	100.045	181.77	63.2611	0.626892
355	K6_L3C7_2	0.0405	22.0601	52.187	0.7707	0.7128	-0.0136	0.0203	0.1343	21.9978	1.2274	-0.0294	-0.082	99.1508	183.83	63.1859	0.628527
355	K6_L3C7_2	0.0051	22.1543	52.2386	0.6838	0.7788	-0.0068	-0.0135	0.0925	21.8991	1.2865	-0.0336	0.0615	99.2002	185.9	63.2993	0.629912
355	K6_L3C7_2	0.0202	22.1461	52.9103	0.8077	0.7721	-0.0136	0.0113	0.003	22.061	1.2443	0.0112	-0.0308	99.9871	187.96	63.1355	0.62863
355	K6_L3C7_2	-0.0051	22.1868	52.2772	0.6769	0.7883	0.0204	-0.0158	0.0209	21.9325	1.1756	0.0252	0.041	99.1448	190.03	63.2871	0.631047
355	K6_L3C7_2	0.0316	22.0256	52.5195	0.6923	0.7873	-0.0339	0.0113	0.1314	21.9223	1.1625	0.0098	-0.0273	99.2935	192.1	63.1292	0.629584
355	K6_L3C7_2	0.0202	22.0899	53.0044	0.7335	0.7304	-0.0136	0.0113	0.1015	21.9138	1.2548	-0.0351	0.041	99.9008	194.16	63.2797	0.629408
355	K6_L3C7_2	0.0076	22.0235	52.4068	0.7861	0.716	0.0407	0.009	0.1075	21.7528	1.2218	-0.007	-0.0068	99.0719	196.23	63.3929	0.630669
355	K6_L3C7_2	0.0088	21.8423	52.6292	1.1816	0.7428	-0.0136	0.0113	0.0896	21.9264	1.1165	0.0056	-0.0137	99.554	198.29	62.9883	0.628063
355	K6_L3C7_2	-0.0013	22.1277	51.7079	0.7298	0.7274	0.0339	0.0158	0.1134	21.8026	1.1556	-0.0112	0.0786	98.4926	200.36	63.4366	0.631942
355	K6_L3C7_2	0.0455	22.0945	52.3709	0.631	0.7021	-0.0543	-0.0113	0.1343	21.9246	1.1651	0.0224	-0.0273	99.0904	202.42	63.3104	0.630263
355	K6_L3C7_2	0.0328	22.1537	52.1419	0.8013	0.7122	0.0882	-0.0158	0.0567	21.7658	1.2673	-0.0519	0.0273	99.0472	204.49	63.5213	0.631444
355	K6_L3C7_2	-0.0126	22.1938	52.9999	0.7119	0.6723	-0.0068	-0.0293	0.0627	21.8494	1.3663	0.0056	0.0068	99.8688	206.55	63.53	0.630014
355	K6_L3C7_2	-0.0051	22.1601	52.5517	0.7993	0.6568	0.0068	-0.0068	0.0985	22.0109	1.2903	0.0266	0.0171	99.6182	208.62	63.3505	0.628813
355	K6_L3C7_2	0.0265	21.9662	52.1689	1.7252	0.7013	-0.0271	0.009	0.0895	21.7503	1.3852	0.0168	-0.1059	99.839	210.69	63.3543	0.628414
355	K6_L3C7_2	0.0354	22.2574	52.7244	0.6838	0.6883	0.0611	-0.0248	0.1851	21.9692	1.202	-0.0393	-0.0752	99.8066	212.75	63.4536	0.631149
355	K6_L3C7_2	0.0379	22.1479	52.5936	0.6618	0.6881	-0.0068	-0.0203	0.1194	22.024	1.1851	-0.0182	-0.0034	99.4578	214.82	63.2837	0.629621
355	K6_L3C7_2	0.1062	22.175	51.7076	0.7481	0.7631	-0.0068	0.0789	0.1523	21.7342	1.2346	0.0267	-0.0752	98.7268	216.88	63.5092	0.632321
355	K6_L3C7_2	0.0328	22.0756	52.6286	0.7464	0.7402	-0.0136	0.0135	0.0508	21.8338	1.1922	0.0182	-0.0273	99.3322	218.95	63.3333	0.630703
355	K6_L3C7_2	0.0114	22.1505	52.3842	0.875	0.7204	0.0136	0.018	0.0896	21.8047	1.1788	0.007	-0.0718	99.2531	221.01	63.4675	0.631923
355	K6_L3C7_2	0.0139	22.2189	52.2349	0.7474	0.717	-0.0271	0.0226	0.0328	21.8089	1.2185	0.0351	-0.0342	99.05	223.08	63.5391	0.632191
355	K6_L3C7_2	0.0708	22.151	51.3373	1.0571	0.8051	-0.0068	0.0495	0.0596	21.7622	1.3942	0.0434	-0.0171	98.7304	225.14	63.4007	0.630157
355	K6_L3C7_2	0.2986	21.0708	50.8824	3.7947	1.0558	0	0.1941	0.0749	20.453	1.2313	0.0085	0.0034	99.0676	227.21	63.2688	0.633815
355	K6_L3C7_2	0.0681	22.1044	52.6765	0.851	0.7161	-0.0204	0.0338	0.1135	21.8231	1.2219	0.0084	0.0137	99.6306	229.27	63.406	0.630811
355	K6_L3C7_2	0.0088	21.9984	51.9081	0.7455	0.6616	-0.0204	0.0045	0.0328	21.7054	1.1988	-0.0084	-0.0068	98.2641	231.34	63.4865	0.631121
355	K6_L3C7_2	0.0417	22.0926	52.4028	0.752	0.7131	0.0407	0.0248	0.1134	21.7804	1.3134	0.0126	0	99.2875	233.41	63.4411	0.630182
355	K6_L3C7_2	0.0595	22.0398	51.9007	0.7385	0.728	0.0136	0.0338	0.1402	21.9856	1.1486	0.0196	0.0512	98.8592	235.47	63.1571	0.629238
355	K6_L3C7_2	0.0405	22.0336	51.7463	0.8708	0.6924	0	0.0135	0.0328	21.9559	1.257	-0.0154	-0.0307	98.6429	237.54	63.2271	0.628366
355	K6_L3C7_2	0.024	22.1588	51.9463	0.8398	0.7057	0	0.0361	0.1372	21.9435	1.2801	0.0252	-0.0102	99.0965	239.6	63.354	0.629578
355	K6_L3C7_2	0.0215	22.1448	51.7334	0.7011	0.6085	0.0136	0.009	0.0984	21.8975	1.2406	0.0196	0.0478	98.5359	241.67	63.5131	0.630295
355	K6_L3C7_2	0	22.2216	52.4202	0.7203	0.7053	-0.0204	0.0248	0.0448	21.9908	1.2017	0.0252	-0.0718	99.3547	243.73	63.3722	0.63056
355	K6_L3C7_2	0.0089	22.1759	52.2088	0.7205	0.6771	-0.0475	0.0023	0.0925	22.1484	1.3128	-0.0056	-0.0102	99.3471	245.8	63.2014	0.627379
355	K6_L3C7_2	0.024	22.1793	51.8704	0.7187	0.6809	0.0271	0.0293	0.0239	21.8012	1.254	-0.035	-0.0171	98.6088	247.86	63.5528	0.631491
355	K6_L3C7_2	0.0554	22.1568	52.7924	0.7461	0.6912	0	0.018	0.1464	21.5545	1.2122	0.0084	-0.0684	99.3816	249.93	63.7688	0.634185
355	K6_L3C7_2	0.0152	22.1289	52.3001	0.7162	0.6728	0.061	0.0135	0.0686	21.9216	1.2144	0.021	-0.0205	99.1335	252	63.3878	0.630152
355	K6_L3C7_2	0	22.1781	52.3857	0.7954	0.6163	0.0271	0.036	0.161	21.8989	1.3552	0.0042	-0.0137	99.4578	254.06	63.5363	0.629466
355	K6_L3C7_2	0.054	21.9014	50.4758	2.7483	0.7561	0.0271	0.0338	0.0926	21.3292	1.1495	0.0477	-0.0171	98.6156	256.13	63.6477	0.634455
355	K6_L3C7_2	0.2041	20.985	47.855	6.8709	0.853	0.0272	0.1061	0.0659	20.2446	1.1087	-0.0324	-0.0342	98.3204	258.19	63.6774	0.636449
355	K6_L3C7_2	0.2616	20.2598	44.5729	8.455	0.8801	-0.0068	0.1734	0.0837	20.0047	1.1397	0.0155	0.0478	95.8942	260.26	63.0855	0.63056
355	K6_L3C7_2	0.4191	18.0373	45.0015	13.3342	0.9566	-0.0408	0.2914	0.0631	18.379	1.1338	0	-0.0308	97.616	262.32	62.1219	0.622148
355	K6_L3C7_2	0.291	20.2539	49.5134	6.4399	0.9685	0.0204	0.1963	0.1138	20.099	1.1912	-0.0212	-0.0034	99.0874	264.39	62.8508	0.628884
355	K6_L3C7_2	0.024	22.0271	52.2891	0.9645	0.7051	-0.0204	0.0473	0.0328	21.7099	1.2343	-0.0267	0.0273	99.0614	266.45	63.4549	0.631013
355	K6_L3C7_2	0.0202	22.0429	51.9936	0.7181	0.7342	0.0068	-0.009	0.0895	21.9555	1.1124	0.0098	-0.0239	98.683	268.52	63.1828	0.629944
355	K6_L3C7_2	0.0063	22.0579	52.2165	0.7216	0.7023	-0.0136	0.0045	0.1224	21.9189	1.126	-0.021	0.0376	98.914	270.59	63.2775	0.630334
355	K6_L3C7_2	0.0266	22.1223	52.5428	0.7072	0.7504	0.0271	0.0383	0.0925	22.0563	1.2734	-0.0182	0.0922	99.7289	272.65	63.1433	0.628131
355	K6_L3C7_2	-0.0088	21.9744	53.1693	0.7674	0.7679	0	0	0.0776	21.982	1.2382	-0.0056	-0.0581	99.9768	274.72	63.0396	0.627667
355	K6_L3C7_2	0.024	22.0308	52.2591	0.7432	0.6598	0.0611	-0.0226	0.1254	21.9235	1.0048	0.0182	-0.041	98.85	276.78	63.2997	0.631244
355	K6_L3C7_2	0.0013	21.954	53.1031	0.7503	0.7337	0.0543	0.0135	0.1164	21.8564	1.1788	0.0042	0.0137	99.7796	278.85	63.1904	0.629324
355	K6_L3C7_2	0.0063	22.0329	52.656	0.666	0.7303	0.0136	0.0068	0.0987	21.8893	1.2562	-0.0126	-0.0205	99.356	280.91	63.2447	0.629037
355	K6_L3C7_2	-0.019	22.0143	52.3475	0.7666	0.7724	-0.0068	-0.0158	0.0925	21.9853	1.4178	-0.0533	0.0034	99.3998	282.98	63.0727	0.626234
355	K6_L3C7_2	0.0265	22.0988	52.6956	0.7879	0.6692	-0.0136	-0.0293	0.1104	21.9822	1.28	-0.0547	-0.0581	99.6506	285.04	63.2992	0.628558
355	K6_L3C7_2	0.0038	21.9986	52.3003	0.6872	0.7857	0.0068	0.0023	0.0747	21.7011	1.2382	0.0295	0.0786	98.9066	287.11	63.3282	0.630761
355	K6_L3C7_2	0.043	22.0197	52.0107	0.6439	0.7236	0.0339	0.0473	0.0567	21.7787	1.2965	0.007	0.0205	98.6816	289.18	63.3524	0.629601
355	K6_L3C7_2	0.043	21.8967	51.9204	0.7216	0.788	-0.0068	-0.0248	0.1433	21.7981	1.2116	0.021	0.0103	98.5539	291.24	63.1181	0.628968
355	K6_L3C7_2	0.0101	22.0526	52.7289	0.7026	0.7429	0.0271	0.0271	0.0776	21.8734	1.1199	0.0014	-0.0034	99.3637	293.31	63.2652	0.6308
355	K6_L3C7_2	0.0417	21.8604	52.7071	0.7186	0.8153	0	0.0045	0.0687	21.7957	1.084	0.0154	-0.0068	99.1114	295.37	63.0462	0.629919
355	K6_L3C7_2	0.0429	21.6247	51.9354	0.6897	0.8905	-0.0203	0.0315	0.0239	21.5376	1.2967	-0.014	-0.0137	98.0729	297.44	62.9592	0.627824
355	K6_L3C7_2	0.4545	18.0162	43.5374	1.7405	9.0638	0.0997	0.3736	0.0334	15.8782	0.9704	-0.0058	0	90.1676	299.5	53.8792	0.655728
355	K6_L3C7_2	0.5565	18.3235	49.5752	3.5053	5.1914	0.0471	0.5404	0.0423	17.9306	1.0902	0.0057	-0.0342	96.8083	301.57	57.0583	0.631804
355	K6_L3C7_2	0.3784	20.2183	55.1124	1.1469	1.1342	0.0068	0.3434	0.2972	20.1535	1.1439	-0.0241	0	99.935	303.63	62.519	0.628401
355	K6_L3C7_2	0.024	21.967	53.3041	0.7449	0.8206	0.0339	0.0293	0.0777	21.8636	1.1166	-0.0028	-0.0718	99.9816	305.7	63.0835	0.630027
355	K6_L3C7_2	0.0492	22.0889	52.941	0.7334	0.677	-0.0272	-0.0203	0.0657	21.7108	1.3011	-0.0211	-0.0137	99.5672	307.77	63.5559	0.630972
355	K6_L3C7_2	-0.0253	22.1613	53.0081	0.6812	0.7323	-0.0407	0.0271	0.0478	21.8834	1.2845	0.0014	0.0171	99.8441	309.83	63.3831	0.630163
355	K6_L3C7_2	0.0139	22.1371	53.1131	0.6573	0.7401	0.0271	0	0.1613	21.8301	1.189	0.0365	0.041	99.9466	311.9	63.4018	0.631421
355	K6_L3C7_2	-0.0101	22.2093	52.4937	0.6241	0.7049	0.0203	-0.0023	0.0627	21.9238	1.2833	-0.0224	0.0547	99.3768	313.96	63.4279	0.630274
355	K6_L3C7_2	0.0177	22.2557	52.9504	0.512	0.7063	0.0611	-0.009	0.0986	21.8088	1.327	0.0337	0.1436	99.9148	316.03	63.5915	0.63147
355	K6_L3C7_2	0.0177	22.2219	52.7524	0.5298	0.7182	-0.0068	-0.0271	0.1195	21.7562	1.0252	0.0323	0.0171	99.1902	318.09	63.5944	0.63474
355	K6_L3C7_2	0.005	22.2546	53.3626	0.4895	0.7297	0.0136	0.0248	0.0687	21.8941	1.0676	-0.0014	0.0376	99.9478	320.16	63.473	0.633247
355	K6_L3C7_2	0.0126	22.2611	52.8095	0.5043	0.7138	-0.0068	0.0068	0.0865	21.6962	1.3163	0.0435	0.0512	99.5019	322.22	63.7022	0.63277
355	K6_L3C7_2	0.0379	22.2634	52.6431	0.5462	0.7454	-0.0068	-0.0045	0.0597	21.788	1.2775	-0.0098	0.0103	99.3715	324.29	63.5696	0.632265
355	K6_L3C7_2	-0.0076	22.2334	53.0872	0.5313	0.746	0.0068	0.009	0.0359	21.5627	1.2751	0.0028	-0.0581	99.4902	326.35	63.768	0.634254
355	K6_L3C7_2	0.0101	22.1899	52.7218	0.5241	0.7262	0.0407	-0.0316	-0.006	21.6553	1.1366	0.0323	0.0034	99.0405	328.42	63.6538	0.634284
355	K6_L3C21	4.7029	0.0099	76.4934	13.1362	2.2773	0	1.9801	0.0947	0.6127	0.0445	-0.0199	0.0279	99.3795	0	0.497394	0.026128
355	K6_L3C21	2.7822	0.0189	77.3612	12.3762	2.0121	0.0353	1.9541	0.0947	0.5989	0.024	0.0642	0.014	97.3357	2.07	1.0494	0.0512869
355	K6_L3C21	3.6917	1.659	72.4988	10.3951	1.7079	-0.0211	1.4292	0.1601	2.1838	0.1636	0.0106	-0.0766	93.8998	4.13	40.3492	0.557263
355	K6_L3C21	0.1669	20.6727	52.8212	1.1493	0.8763	-0.0068	0.0969	0.0925	21.5404	1.3426	0.0196	-0.0683	98.7784	6.2	61.9193	0.616736
355	K6_L3C21	0.0153	21.8844	51.5229	0.5112	0.7889	-0.0068	0.0473	0.1133	22.4361	1.2164	-0.0014	0.0683	98.604	8.26	62.4592	0.622387
355	K6_L3C21	-0.0305	21.7186	52.2273	0.472	0.7898	0.0136	0.0338	0.1103	22.3822	1.1804	-0.0322	-0.0649	98.928	10.33	62.3336	0.621499
355	K6_L3C21	0.0064	21.5933	50.7865	0.5479	0.8212	-0.0338	0.027	0.137	22.6762	1.186	-0.0112	0.0853	97.8666	12.39	61.8636	0.617157
355	K6_L3C21	0.0141	21.5492	51.5716	0.5165	0.81	0	0.0112	0.1369	23.1131	1.3033	-0.0084	0.0307	99.0566	14.46	61.3978	0.611221
355	K6_L3C21	0.0243	21.23	51.7888	0.5989	0.819	0.0203	0.009	0.0952	23.234	1.205	-0.0014	0.0034	99.028	16.52	60.9134	0.607461
355	K6_L3C21	0.0064	21.2138	51.5393	0.6084	0.8257	-0.0135	-0.009	0.113	23.3841	1.3454	-0.0404	-0.0034	99.0362	18.59	60.74	0.604441
355	K6_L3C21	-0.0256	21.1383	51.3707	0.5633	0.8214	0.0338	-0.0022	0.1338	23.3335	1.2045	0.0181	0.0819	98.6994	20.65	60.7098	0.605463
355	K6_L3C21	0.0385	21.0673	51.9851	0.4869	0.9415	0.0135	0.0112	0.0892	23.7356	1.2307	0.0139	0.0307	99.6442	22.72	60.0901	0.600515
355	K6_L3C21	0.0815	18.8427	53.2482	1.3872	0.8671	-0.0474	0.2117	0.0686	22.1252	1.125	0.0014	0.0273	97.9859	24.78	59.1088	0.590792
355	K6_L3C21	0.0141	20.3174	51.7581	0.7394	0.8543	-0.0068	0.018	0.0951	23.6529	1.1639	0.0167	-0.0034	98.6298	26.85	59.4067	0.593247
355	K6_L3C21	0.0412	20.6647	52.0213	0.6143	0.8998	0.0203	0.0135	0.1218	24.0267	1.1347	0.0153	-0.0102	99.5735	28.91	59.398	0.594014
355	K6_L3C21	0.1228	19.3607	52.6616	1.0503	0.8605	0.0474	0.1664	0.1131	22.9043	1.1135	-0.014	-0.0716	98.4007	30.98	58.9756	0.589501
355	K6_L3C21	-0.0194	20.532	50.9219	0.5903	0.9147	-0.0067	0.0224	0.0653	24.3013	1.2051	0.0028	-0.0341	98.5558	33.05	58.9622	0.589161
355	K6_L3C21	0.0414	20.4245	51.2711	0.6189	0.9074	0.0135	-0.0112	0.1364	24.5042	1.3096	-0.0111	-0.0034	99.227	35.11	58.6517	0.584973
355	K6_L3C21	0.0285	20.2726	50.8406	0.5596	0.9278	-0.0405	0.0045	0.0949	24.5572	1.2146	-0.0208	-0.017	98.5001	37.18	58.3958	0.583567
355	K6_L3C21	0.0117	20.3449	50.1058	0.5266	0.885	0.0202	-0.0247	0.0682	24.5766	1.1977	0.0139	-0.1805	97.7505	39.24	58.5157	0.58441
355	K6_L3C21	0.0259	20.1094	51.6687	0.5492	0.9077	-0.0337	-0.0112	0.1068	24.4127	1.2215	-0.0264	-0.0818	99.0018	41.31	58.3606	0.582902
355	K6_L3C21	0.0117	20.2082	51.6201	0.6348	0.928	0	0	0.0652	24.7231	1.2508	0.0278	0.0477	99.5173	43.37	58.162	0.58089
355	K6_L3C21	0.0168	20.2925	51.3025	0.4669	0.9292	0.0135	0.0157	0.1304	24.6919	1.224	0.0097	-0.0545	99.0932	45.44	58.2911	0.58245
355	K6_L3C21	0.0091	20.3031	51.1026	0.5411	0.9624	0.0202	-0.0291	0.1097	24.5162	1.1262	-0.0236	0.109	98.7996	47.5	58.4292	0.585165
355	K6_L3C21	0.0246	20.2855	51.0398	0.5196	0.8798	0	0.0067	0.0682	24.6547	1.1099	-0.0069	0.0375	98.6264	49.57	58.3773	0.583802
355	K6_L3C21	0.0245	20.3032	51.951	0.6053	0.9082	0.0203	0	0.098	24.4475	1.17	0.0611	0.0375	99.6266	51.63	58.5599	0.585396
355	K6_L3C21	0.0479	20.394	50.9371	0.4927	0.8601	0.0472	-0.0314	0.1749	24.6191	1.2112	-0.0083	-0.0102	98.7842	53.7	58.5642	0.584467
355	K6_L3C21	0.0246	20.3814	51.6	0.5627	0.8167	-0.0135	0.0359	0.1215	24.6184	1.2828	0.0277	0.1226	99.5943	55.76	58.6024	0.583643
355	K6_L3C21	-0.0013	20.3245	51.4496	0.5501	0.8529	-0.0135	-0.0135	0.089	24.4623	1.1629	-0.0361	-0.0886	98.8912	57.83	58.6385	0.585579
355	K6_L3C21	0.0401	20.4414	51.5289	0.5338	0.7914	0.0608	0.0224	0.0445	24.568	1.228	0.0153	0	99.2744	59.89	58.752	0.585351
355	K6_L3C21	0.0181	20.4207	51.4634	0.6836	0.821	0.0068	0.0269	0.095	24.2582	1.2155	-0.0848	0.0273	99.0365	61.96	58.9862	0.588154
355	K6_L3C21	0.0207	20.5695	51.358	0.5758	0.8261	-0.0135	-0.0157	0.0267	24.4113	1.2509	-0.0264	-0.0613	99.0388	64.03	59.0097	0.588124
355	K6_L3C21	0.0232	20.5818	51.7967	0.5804	0.7909	-0.0608	-0.0112	0.1365	24.2711	1.1928	-0.0097	0.0273	99.4007	66.09	59.2007	0.590152
355	K6_L3C21	-0.009	20.7363	51.6331	0.6386	0.7892	0.0608	-0.0045	0.098	24.196	1.2126	0.0264	0	99.3908	68.16	59.455	0.592482
355	K6_L3C21	0.0258	20.8293	51.3737	0.6248	0.7216	0	-0.0022	0.1484	24.1005	1.1307	0.0153	0.0716	99.0418	70.22	59.7373	0.59526
355	K6_L3C21	0.0296	20.8699	50.951	0.6452	0.7761	0.0338	-0.0045	0.0653	23.9587	1.1115	-0.0097	0.0443	98.4854	72.29	59.8534	0.597271
355	K6_L3C21	0.0257	21.042	51.5273	0.6463	0.7596	0.027	0.009	0.1159	23.7413	1.1777	-0.0167	0	99.0718	74.35	60.2808	0.600688
355	K6_L3C21	0.0334	21.1637	51.1449	0.5622	0.7081	0.0338	-0.0067	0.0802	23.7296	1.1121	-0.0264	-0.0614	98.5681	76.42	60.494	0.602822
355	K6_L3C21	-0.009	21.3256	52.0612	0.5051	0.6759	0.0609	0.0022	0.0774	23.4561	1.1691	0.0126	0.0034	99.3495	78.48	60.9824	0.606728
355	K6_L3C21	-0.0026	21.4366	51.4581	0.4733	0.6735	0.0203	0	0.0773	23.4525	1.2729	0.007	0.0341	98.9056	80.55	61.1124	0.606985
355	K6_L3C21	0.0153	21.5204	52.6476	0.3744	0.6466	0	0.0068	0.0565	23.177	1.189	0.0251	-0.0239	99.6587	82.61	61.5092	0.611408
355	K6_L3C21	0.0179	21.6772	52.3231	0.3711	0.7052	-0.0338	0.009	0.0536	23.0724	1.2214	0.0098	-0.0546	99.4605	84.68	61.71	0.613831
355	K6_L3C21	0.014	21.6762	52.2205	0.3512	0.6758	-0.0068	0.0045	-0.0119	22.9986	1.2377	-0.0307	-0.0512	99.1785	86.74	61.819	0.614379
355	K6_L3C21	0.0115	21.7011	51.791	0.4585	0.7179	0.0338	-0.0382	0.0417	22.8511	1.3987	-0.0014	0.0717	99.0769	88.81	61.9388	0.614499
355	K6_L3C21	0.0051	21.7546	52.3894	0.4614	0.644	-0.0068	0.027	0.0715	22.8804	1.1564	-0.0098	0.0409	99.4306	90.87	62.0616	0.617198
355	K6_L3C21	-0.0229	21.7712	52.3827	0.46	0.6506	0.0407	-0.0405	0.0566	23.002	1.1403	-0.0182	-0.1127	99.504	92.94	61.9507	0.616345
355	K6_L3C21	0.0242	21.7769	51.3818	0.5133	0.7115	0.0203	0.0067	0.0536	22.9921	1.2119	0.0195	0.0034	98.7154	95.01	61.8896	0.615795
355	K6_L3C21	0.037	21.7643	51.564	0.5078	0.7133	0.0203	0.0315	0.0238	23.0067	1.274	-0.007	-0.0478	98.9428	97.07	61.8593	0.614902
355	K6_L3C21	0.0293	21.7178	51.9867	0.5107	0.6295	0.0203	0.0045	0.0922	22.8039	1.3854	0.0447	0.0614	99.2864	99.14	62.1164	0.615274
355	K6_L3C21	0.0293	21.7902	51.6264	0.4949	0.685	0.0203	-0.0023	0.1072	22.8208	1.2582	-0.0307	0	98.8323	101.2	62.1072	0.617157
355	K6_L3C21	-0.0038	21.8364	52.3802	0.4527	0.6105	0	0.0023	0.0209	22.8703	1.1306	-0.0042	-0.0683	99.3039	103.27	62.2026	0.61844
355	K6_L3C21	0.0191	21.789	52.0462	0.4765	0.5995	0.0068	-0.0113	0.0476	22.9054	1.235	0.0419	0.041	99.2078	105.33	62.1306	0.616545
355	K6_L3C21	0.0089	21.7892	52.704	0.4956	0.663	0.0407	0.0158	0.0834	22.8428	1.2061	-0.0014	-0.0512	99.8495	107.4	62.1122	0.617448
355	K6_L3C21	0.0102	21.765	52.3522	0.6351	0.6469	0	-0.0293	0.0685	22.8541	1.091	-0.0224	-0.116	99.4229	109.46	62.0953	0.618221
355	K6_L3C21	0.0178	21.7301	51.948	0.5923	0.6315	0.0203	-0.0135	0.0804	22.9528	1.1562	-0.0293	0.099	99.2285	111.53	61.9791	0.616223
355	K6_L3C21	0.0255	21.796	51.7767	0.5507	0.6796	-0.0474	0.036	0.0863	22.8027	1.2941	-0.0377	-0.0102	99.0476	113.59	62.1383	0.617041
355	K6_L3C21	-0.0076	21.8113	51.9513	0.5943	0.646	0.0271	0.0338	0.0655	22.7531	1.2646	0.014	0.1707	99.3316	115.66	62.247	0.617986
355	K6_L3C21	0.0102	21.8364	51.7106	0.531	0.6647	0.0474	-0.009	0.0834	22.7217	1.2321	-0.021	-0.0614	98.8376	117.72	62.2814	0.61889
355	K6_L3C21	0.0089	21.8207	51.6275	0.5419	0.6915	-0.0271	0.0428	0.0923	22.6387	1.3046	-0.0126	0.0341	98.803	119.79	62.3131	0.618815
355	K6_L3C21	0.0115	21.8973	51.3977	0.5282	0.6149	-0.0136	-0.009	0.0536	22.761	1.1896	-0.0112	0.0819	98.5357	121.85	62.3712	0.619584
355	K6_L3C21	0.0089	21.8252	52.2223	0.5541	0.6855	0.0339	-0.0203	0.0983	22.7145	1.3181	-0.021	0.0341	99.4949	123.92	62.25	0.617984
355	K6_L3C21	0.0331	21.7985	51.7822	0.5705	0.6733	0.0203	-0.0045	0.1131	22.7002	1.317	-0.0237	-0.0205	99.0083	125.99	62.2511	0.617846
355	K6_L3C21	0.0064	21.8183	52.5002	0.561	0.692	0.0203	0.0113	0.1193	22.6785	1.125	-0.0056	0.0444	99.5766	128.05	62.2701	0.620191
355	K6_L3C21	0.0013	21.7698	52.0087	0.489	0.6641	0.0474	0.0225	0.0268	22.7474	1.1834	-0.021	0.0341	98.9945	130.12	62.1848	0.618402
355	K6_L3C21	-0.0293	21.7377	52.1643	0.581	0.6396	0.0474	-0.0113	0.0447	22.7353	1.2678	-0.0224	-0.0887	99.2178	132.18	62.1935	0.617331
355	K6_L3C21	0.0076	21.8953	51.5098	0.5421	0.6975	0	0.0225	0.0655	22.8092	1.1599	0.007	-0.0034	98.7164	134.25	62.216	0.619384
355	K6_L3C21	-0.0013	21.7999	52.3081	0.5373	0.704	0.0203	-0.009	0.0596	22.6518	1.1734	-0.0042	-0.041	99.2545	136.31	62.2616	0.619771
355	K6_L3C21	0.0382	21.8841	51.8885	0.5436	0.6594	0.0339	0.0045	0.0328	22.7252	1.2651	0.021	0	99.0962	138.38	62.3359	0.619042
355	K6_L3C21	0.0127	21.8537	51.9614	0.5526	0.721	-0.0271	-0.0023	0.0596	22.7804	1.2259	-0.007	0.0307	99.1981	140.44	62.1699	0.618562
355	K6_L3C21	0	21.7891	51.991	0.4438	0.7168	-0.0136	-0.027	0.0924	22.6624	1.1674	-0.0084	-0.0205	98.8628	142.51	62.223	0.61961
355	K6_L3C21	0.0153	21.8411	51.9134	0.5055	0.6878	-0.0406	0.0225	0.1251	22.7721	1.2421	-0.0252	0.0307	99.1556	144.57	62.2069	0.618346
355	K6_L3C21	0.0051	21.8839	51.8788	0.5163	0.6521	-0.0068	0.0113	0.0983	22.651	1.1992	0.0098	0.0887	98.9944	146.64	62.4191	0.620427
355	K6_L3C21	0.0038	21.8769	52.1486	0.5502	0.6719	-0.0406	-0.0293	0.1698	22.6708	1.1539	-0.0475	0	99.246	148.7	62.3665	0.620609
355	K6_L3C21	0.0089	21.8122	52.3434	0.5156	0.6606	0	-0.0023	0.0477	22.5798	1.1246	0.0056	0.0205	99.1189	150.77	62.4024	0.621107
355	K6_L3C21	0.0241	21.8942	52.9371	0.4882	0.7493	-0.0136	-0.0068	0.0537	22.5319	1.2073	0.035	-0.0273	99.9208	152.83	62.4247	0.621634
355	K6_L3C21	0.0025	21.8461	53.0146	0.5332	0.6593	-0.0271	-0.0045	0.0746	22.5135	1.2207	-0.035	0.0034	99.8679	154.9	62.5069	0.621165
355	K6_L3C21	0.0305	21.8775	52.7507	0.51	0.6462	-0.0068	-0.0045	0.0775	22.7218	1.1834	-0.014	-0.0205	99.7974	156.96	62.3491	0.619818
355	K6_L3C21	0.0051	21.7798	51.9764	0.5412	0.6967	0.0135	0.0113	0.1013	22.6057	1.2551	-0.0224	-0.0273	98.986	159.03	62.2953	0.619192
355	K6_L3C21	0.0217	21.87	51.8504	0.5147	0.7199	-0.0068	0.0248	-0.003	22.7746	1.3566	-0.0112	-0.0341	99.1326	161.1	62.1946	0.617497
355	K6_L3C21	0.0368	21.8388	52.3239	0.5683	0.6937	0.0339	-0.0135	0.0715	22.6169	1.1741	-0.0056	-0.0137	99.358	163.16	62.3515	0.62053
355	K6_L3C21	0.0153	21.8478	52.2017	0.5358	0.7265	-0.0271	-0.0158	0.0626	22.7309	1.1147	-0.0042	-0.0102	99.2352	165.23	62.2057	0.620095
355	K6_L3C21	0.0114	21.8644	52.5569	0.5461	0.7292	-0.0271	0.0023	0.0566	22.6699	1.1245	-0.0014	0.0102	99.5714	167.29	62.2808	0.620778
355	K6_L3C21	0.014	21.7884	51.7717	0.4313	0.744	0.0135	0.0068	0.0983	22.7588	1.1601	-0.0168	-0.0478	98.7868	169.36	62.0917	0.618724
355	K6_L3C21	0.0382	21.7881	52.5299	0.5029	0.7438	0	0.0135	0.1012	22.8616	1.2844	-0.0461	0.0444	99.9079	171.42	61.9898	0.616475
355	K6_L3C21	0.0064	21.8457	52.1645	0.5361	0.6949	0	0.0248	0.1221	22.7722	1.3337	-0.0196	-0.0819	99.5003	173.49	62.2027	0.617485
355	K6_L4C16	0	0.0025	0.0193	-0.0039	0.0152	0.0117	0.0121	-0.0238	0.2395	-0.0179	0.0048	-0.016	0.3052	0	1.69168	0.0197336
355	K6_L4C16	-0.0184	0.0037	0.0197	0.008	0.0112	-0.006	0.004	-0.0079	0.2313	0.0059	-0.0094	0.0032	0.2871	2.02	2.6147	0.0270448
355	K6_L4C16	-0.0081	0.0351	0.0433	0.1269	0.005	-0.0062	-0.0211	0.0028	0.2645	0.0276	0	0.0394	0.5446	4.04	18.7624	0.176237
355	K6_L4C16	0.0033	0.1029	0.0463	0.0545	0.0199	-0.0247	0.0042	-0.0138	0.3047	0.0184	0.0151	0.0328	0.6021	6.06	35.7121	0.361956
355	K6_L4C16	0.0511	4.3557	3.6223	0.1443	0.1799	0.0065	0.0196	0.02	5.6554	0.1425	0.0039	0.0134	14.2146	8.08	56.8804	0.572418
355	K6_L4C16	0.0347	16.8828	47.0198	0.2791	0.9053	0.0469	0.0178	0.1323	26.5729	1.08	-0.0068	-0.0475	92.9717	10.1	52.0421	0.521016
355	K6_L4C16	0.0027	16.6832	50.8625	0.2649	0.7932	0	0.0067	0.1499	28.3823	1.005	0.0109	0.0034	98.1647	12.12	50.2876	0.502862
355	K6_L4C16	0.0094	16.8699	50.6368	0.4441	0.5435	0.0067	0.0156	0.1495	29.0167	1.2007	0.045	0.0441	98.982	14.14	50.2998	0.498663
355	K6_L4C16	0.0131	18.8996	51.8692	0.6008	0.6956	0.0135	0.0022	0.0443	25.9354	1.2833	0.0511	-0.1055	99.408	16.16	55.6704	0.552971
355	K6_L4C16	0.0204	21.3102	52.7224	0.466	0.7782	0	0.0158	0.0894	22.8679	1.1572	0.0098	-0.0137	99.4373	18.18	61.4158	0.612425
355	K6_L4C16	0.0304	21.8154	52.7577	0.3325	0.7936	-0.061	-0.027	0.0656	22.3282	1.2463	-0.0042	0.041	99.4106	20.2	62.4873	0.622417
355	K6_L4C16	0.0063	21.6809	52.6256	0.4804	0.7555	-0.0068	0.0113	0.0835	22.1783	1.1779	-0.0658	-0.0034	98.9996	22.22	62.5427	0.623157
355	K6_L4C16	-0.0178	21.6214	52.5763	0.4968	0.7651	0.0746	0.0135	0.1014	22.3009	1.2728	-0.0294	0.0205	99.2431	24.24	62.3419	0.62032
355	K6_L4C16	0.0051	21.729	52.5993	0.5169	0.7726	-0.0407	-0.0068	0.1641	22.2599	1.1783	0.0252	-0.0103	99.2504	26.26	62.49	0.622855
355	K6_L4C16	-0.0102	21.6939	52.541	0.5329	0.8076	-0.0068	0.0068	0.1073	22.2129	1.3151	0.0364	-0.0683	99.2539	28.28	62.4543	0.621559
355	K6_L4C16	0.0203	21.7117	52.7539	0.5439	0.737	0	-0.009	0.0806	22.2237	1.1879	-0.0252	-0.0717	99.2589	30.3	62.554	0.622933
355	K6_L4C16	0.0051	21.7715	52.1749	0.5805	0.7723	-0.0407	0.0068	0.0805	22.2528	1.2171	-0.0182	0.0137	98.875	32.32	62.5434	0.622992
355	K6_L4C16	0.0178	21.8312	52.5163	0.5497	0.7606	0.0203	-0.0158	0.0775	22.2547	1.381	0	0.0512	99.4603	34.34	62.6207	0.621961
355	K6_L4C16	0.0266	21.5828	52.2692	0.5186	0.741	-0.0136	-0.0023	0.0656	22.2214	1.1478	-0.0056	0.0444	98.6173	36.36	62.4115	0.621965
355	K6_L4C16	0.0051	21.848	53.0337	0.5439	0.8103	0.0271	0.0068	0.0179	22.1586	1.4511	-0.0126	0.0376	99.9401	38.38	62.6714	0.622392
355	K6_L4C16	0.0203	21.9006	52.8412	0.452	0.7821	-0.0068	-0.0248	0.1044	22.3178	1.3023	0.0224	-0.0888	99.7431	40.4	62.6038	0.622872
355	K6_L4C16	0.0038	21.9514	53.0926	0.3864	0.7405	0.0814	0	0.0328	22.0636	1.2865	0.0056	-0.0034	99.6446	42.42	62.9681	0.626112
355	K6_L4C16	-0.0152	21.8801	52.6995	0.396	0.7674	-0.0136	0.0068	0.1044	22.2924	1.1948	0.0028	0	99.3441	44.44	62.6263	0.62399
355	K6_L4C16	-0.0013	21.9415	53.0751	0.4263	0.7517	0.061	-0.0203	0.0298	22.2534	1.3447	0.0252	-0.0717	99.9086	46.46	62.7514	0.623524
355	K6_L4C16	0.019	21.8035	52.8027	0.4426	0.7246	0.0339	-0.0023	0.0716	22.0205	1.2211	0.0182	-0.0273	99.1576	48.48	62.8748	0.625627
355	K6_L4C16	0.019	21.8374	53.191	0.4295	0.8131	0.0136	0.0135	0.1759	22.1972	1.2792	0.0098	0.0376	100.017	50.5	62.6175	0.623629
355	K6_L4C16	0.0253	21.8406	52.945	0.475	0.8317	0.0203	0.0225	-0.009	22.0512	1.2408	0.028	-0.0581	99.4805	52.52	62.7442	0.625516
355	K6_L4C16	0.0203	21.8492	52.8082	0.4013	0.7984	0.0203	0.009	0.0865	22.2825	1.214	-0.0028	-0.0581	99.4897	54.54	62.5633	0.623563
355	K6_L4C16	0.0215	21.7766	53.1405	0.3721	0.805	0.0271	0	0.1433	22.0927	1.2706	-0.0519	-0.0581	99.6493	56.56	62.6682	0.624108
355	K6_L4C16	0.0418	21.8912	52.6592	0.4628	0.7881	0.0136	0.018	0.1015	21.978	1.2544	-0.0126	0.0205	99.2291	58.58	62.929	0.626655
355	K6_L4C16	0.0063	21.9214	52.7204	0.3977	0.8219	0.0339	-0.0135	0.0776	22.1284	1.1917	0	-0.0034	99.2994	60.6	62.7653	0.626104
355	K6_L4C16	0.0405	21.7787	53.3912	0.3771	0.8354	0	0.0203	0.1045	22.0353	1.2477	0.0084	-0.0205	99.839	62.62	62.6892	0.62494
355	K6_L4C16	0.0114	21.8783	53.3133	0.4547	0.8921	0	-0.0158	0.0895	22.1137	1.28	0.0042	0.0137	100.051	64.64	62.6435	0.624895
355	K6_L4C16	-0.0025	21.8451	53.577	0.3139	0.8607	-0.0136	0.0068	0.0836	21.9057	1.2711	0.007	-0.0615	99.871	66.66	62.8588	0.62672
355	K6_L4C16	-0.0038	22.0139	52.9214	0.3053	0.8627	-0.0068	0.0135	0.0955	21.814	1.2668	0.0182	-0.0854	99.3113	68.68	63.1287	0.629487
355	K6_L4C16	0.0165	22.0202	52.7607	0.3019	0.86	-0.0203	-0.009	0.0597	21.9484	1.4179	0.007	0.0137	99.4058	70.7	63.0027	0.626665
355	K6_L4C16	0.0341	22.0915	52.9122	0.2585	0.8638	0.0136	-0.0045	0.1075	21.9554	1.1983	-0.0126	-0.0205	99.4348	72.72	63.066	0.629582
355	K6_L4C16	0.043	22.0558	53.1918	0.2908	0.9133	-0.0339	0.0361	0.1284	21.9302	1.2022	0.0351	-0.0137	99.8268	74.74	62.9897	0.629419
355	K6_L4C16	-0.0126	22.0628	53.252	0.3541	0.8935	0.0339	0.0045	0.0388	21.9856	1.2772	0.0182	0.0547	99.9752	76.76	62.9668	0.628172
355	K6_L4C16	0.0266	22.011	52.8363	0.3651	0.9254	-0.0203	-0.0293	0.1433	21.9764	1.3265	-0.007	0.0376	99.6482	78.78	62.8801	0.627214
355	K6_L4C16	0.0353	21.9951	53.3774	0.3446	0.9265	-0.0271	-0.0113	0.0537	21.8871	1.2412	0.0112	0	99.8723	80.8	62.9519	0.628812
355	K6_L4C16	0.0038	21.9574	52.9924	0.336	0.9179	-0.0611	0.0158	0.1793	21.8152	1.2057	0.0056	0.0308	99.4597	82.82	62.9959	0.629501
355	K6_L4C16	-0.0126	21.8867	53.3819	0.5105	0.8796	-0.0068	0.0135	0.1345	21.9118	1.0874	-0.0463	-0.0273	99.8059	84.84	62.8725	0.628984
355	K6_L4C16	0.0114	21.6728	53.0159	0.5373	0.8806	-0.0068	-0.0225	0.1284	21.9085	1.2211	-0.0112	-0.0102	99.376	86.86	62.645	0.625349
355	K6_L4C16	0.0063	21.8462	53.3118	0.4963	0.857	0.0204	-0.009	0.0687	22.0754	1.1822	0.0014	-0.0273	99.8658	88.88	62.693	0.625929
355	K6_L4C16	0.0304	21.7149	52.9076	0.529	0.8291	0	-0.0023	0.0567	22.0669	1.1587	0	-0.041	99.2932	90.9	62.5967	0.624842
355	K6_L4C16	0.0316	21.7264	53.0824	0.5719	0.898	0.0407	0.0451	0.1045	21.9984	1.238	-0.0421	-0.0068	99.7371	92.92	62.5891	0.624847
355	K6_L4C16	0.0253	21.7931	53.2855	0.5683	0.8783	0.0678	-0.018	0.0746	22.0885	1.2839	-0.0126	-0.0273	100.065	94.94	62.5953	0.624193
355	K6_L4C16	0.0203	21.6693	52.7169	0.5907	0.9163	-0.0203	0.0496	0.1194	22.2164	1.3459	0	-0.0444	99.6449	96.96	62.284	0.620946
355	K6_L4C16	0.0304	21.6359	52.7668	0.6224	0.8847	0.0068	0.009	0.0447	22.0091	1.2467	0.021	0.058	99.3356	98.98	62.4977	0.623671
355	K6_L4C16	-0.0253	21.7827	53.8688	0.6648	0.9723	0.0204	-0.0158	0.1135	22.1016	1.2022	-0.0098	0.0376	100.764	101	62.4497	0.62478
355	K6_L4C16	0.024	22.1319	53.8054	0.6024	0.9541	0.0203	0.0023	0.1434	22.0256	1.2709	0.0267	-0.0376	101.007	103.02	62.9215	0.628565
355	K6_L4C16	0.024	22.3414	52.021	0.7442	0.9969	0.0136	0.0338	0.0985	21.9141	1.205	-0.0281	-0.0478	99.3924	105.04	63.1978	0.632548
355	K6_L4C16	0.0164	22.041	53.0136	0.5181	1.0642	-0.0203	-0.018	0.0149	21.8122	1.087	-0.0435	-0.082	99.5675	107.06	62.8982	0.631636
355	K6_L4C16	0.0329	21.7214	53.4742	0.3498	0.9443	0.061	-0.018	0.0926	21.9619	1.3201	0.0014	-0.0137	99.9596	109.08	62.5606	0.624323
355	K6_L4C16	0.0114	21.8239	53.2796	0.471	0.9698	-0.0203	0.0158	0.1015	22.1336	1.3458	0.0421	0.0478	100.242	111.1	62.4652	0.623445
355	K6_L4C16	0.0215	21.7589	52.5396	0.5185	0.9189	-0.0068	0.018	0.1194	22.0438	1.2505	0	0.0307	99.2197	113.12	62.5512	0.624613
355	K6_L4C16	0.0266	21.7774	52.8158	0.491	0.8464	0.0136	0.027	0.1164	21.9802	1.2173	-0.0126	0.0615	99.373	115.14	62.7293	0.625791
355	K6_L4C16	0.0165	21.705	52.898	0.5273	0.8441	0	0.0045	0.0806	22.2236	1.2242	0.0182	0.0342	99.5762	117.16	62.4084	0.622493
355	K6_L4C16	0.0164	21.7818	53.3044	0.6618	0.8854	0.0204	-0.009	0.1224	22.0104	1.2247	-0.0253	0.0444	100.072	119.18	62.6529	0.625459
355	K6_L4C16	0.0455	21.7713	52.9364	0.585	0.8304	-0.0339	0.0406	-0.0149	22.018	1.1527	0.0112	-0.0547	99.3912	121.2	62.7052	0.626005
355	K6_L4C16	0.0266	21.703	53.4973	0.6187	0.8088	0.0271	-0.0293	0.0657	22.0859	1.3069	-0.0421	-0.0923	100.14	123.22	62.5909	0.623012
355	K6_L4C16	0.0152	21.6064	52.6519	0.5506	0.8018	0.0271	-0.0158	0.0865	22.0388	1.3878	-0.0168	-0.0444	99.166	125.24	62.5433	0.621615
355	K6_L4C16	0.038	21.5524	53.2007	0.5481	0.8111	0.0068	0.0135	0.1403	22.0003	1.3033	0.0491	-0.0137	99.6635	127.26	62.5117	0.622274
355	K6_L4C16	0.0101	21.4404	53.7805	0.4141	0.8471	-0.0543	0.0158	0.0657	22.0109	1.2082	-0.007	-0.0478	99.7927	129.28	62.3318	0.621915
355	K6_L4C16	0.0342	21.3575	53.4601	0.5044	0.6977	0.0068	0.0225	0.0418	22.2084	1.109	-0.0224	0.0546	99.497	131.3	62.2346	0.620022
355	K6_L4C16	0.0038	21.5985	52.904	0.5229	0.7333	0	0.0383	0.0298	22.0169	1.145	0.0014	-0.0171	98.9939	133.32	62.6463	0.624227
355	K6_L4C16	0.0139	21.5609	53.2697	0.4958	0.7697	0.0204	0.0068	0.0597	21.918	1.1659	0.0253	0.0171	99.3231	135.34	62.6589	0.624606
355	K6_L5C4	2.8513	0.0461	76.1331	9.3544	0.8205	0.0424	3.1315	0.0821	0.7297	0	-0.0382	0.0384	93.2295	0	4.41076	0.101217
355	K6_L5C4	2.333	9.8457	59.021	9.9173	1.514	0	2.4737	0.1193	12.3808	0.5608	0.0044	-0.0103	98.1701	2.02	55.0673	0.57544
355	K6_L5C4	0.0251	22.3176	52.8544	0.7202	0.9602	-0.0611	0.0135	0.0958	21.1467	1.0855	0.0113	-0.0103	99.2303	4.04	64.0007	0.641356
355	K6_L5C4	0.0364	22.4875	52.4497	0.6631	0.9537	0.0204	0.0293	0.0628	20.9462	1.039	0.0183	0.0752	98.7815	6.06	64.3905	0.645664
355	K6_L5C4	-0.0212	22.5699	53.5921	0.676	0.9769	0.0612	0.0045	0.1468	20.8232	0.9677	-0.0042	0.0445	99.8627	8.08	64.5708	0.648534
355	K6_L5C4	0.0238	22.6942	52.7539	0.6467	0.9362	-0.0136	0.0135	0.1198	20.7961	1.0562	-0.0183	0.0137	99.0541	10.1	64.7785	0.649133
355	K6_L5C4	0.0125	22.7643	53.7645	0.6365	0.8532	0.0476	-0.0045	0.1407	20.7112	1.2374	-0.0056	0.0342	100.202	12.12	65.0476	0.648811
355	K6_L5C4	0.0265	21.8809	52.9536	0.6389	0.7514	0	0.0248	0.1224	21.7248	1.3526	-0.0126	-0.0854	99.476	14.14	63.2242	0.628096
355	K6_L5C4	0.0279	21.4088	52.7948	0.6783	0.7376	-0.0339	-0.0068	0.0924	22.3413	1.227	0.0112	0.0171	99.3364	16.16	62.1044	0.61805
355	K6_L5C4	0.0216	21.6027	52.5488	0.6377	0.7204	0.0068	0.0113	0.1461	22.4279	1.1773	0.0224	-0.0512	99.3228	18.17	62.2514	0.619814
355	K6_L5C4	0	21.7678	52.579	0.62	0.6645	0.0136	0.0045	0.0775	22.163	1.3715	-0.0098	-0.0751	99.2615	20.19	62.77	0.622287
355	K6_L5C4	0.0114	21.7133	53.2033	0.5824	0.7649	-0.0271	-0.0068	0.0925	21.9479	1.1655	-0.0267	0.0171	99.4984	22.21	62.7993	0.625958
355	K6_L5C4	0.0025	21.7283	52.2615	0.6344	0.7643	0.0407	0.0045	0.1521	22.225	1.2204	0.0154	0.0239	99.0731	24.23	62.5352	0.62277
355	K6_L5C4	0.019	21.824	53.3212	0.612	0.6902	0.0203	0.0225	0.0656	22.3461	1.3973	-0.0182	-0.1093	100.318	26.25	62.6118	0.620813
355	K6_L5C4	0.0431	21.8117	52.5329	0.6107	0.686	-0.0746	-0.0315	0.0686	22.081	1.1943	0.0392	0.082	99.1495	28.27	62.8724	0.625379
355	K6_L5C4	0.014	21.7839	52.472	0.6777	0.7739	0.0271	-0.0045	0.1371	22.2511	1.3087	-0.0084	-0.0717	99.4453	30.29	62.5564	0.622216
355	K6_L5C4	0.0329	21.8382	52.8105	0.551	0.7207	-0.0407	-0.0023	0.0179	22.1949	1.2105	0.0112	0.0683	99.456	32.31	62.7402	0.624356
355	K6_L5C4	0.0013	21.8931	52.7054	0.5981	0.7289	0.0136	-0.0135	0.1014	22.131	1.257	-0.021	-0.0205	99.4297	34.33	62.8528	0.625113
355	K6_L5C4	0.0456	21.8893	52.6556	0.5657	0.687	0.0407	-0.0023	0.0716	22.0588	1.2866	0.0098	-0.0137	99.3108	36.35	62.9765	0.625495
355	K6_L5C4	0	21.8694	52.249	0.5864	0.7026	0.0136	0.0203	0.0268	22.3733	1.2789	-0.0168	0.1024	99.2226	38.37	62.617	0.622221
355	K6_L5C4	0.0557	21.8878	52.6531	0.6523	0.7063	-0.0407	-0.027	0.0716	22.2326	1.3088	0.0014	0.0239	99.5934	40.39	62.7737	0.623517
355	K6_L5C4	0.0101	21.8625	52.0847	0.7323	0.7429	-0.0339	0.0135	0.0477	22.1605	1.2466	0.049	-0.0034	98.9498	42.41	62.7722	0.624595
355	K6_L5C4	-0.0127	21.8505	52.3784	0.7234	0.6751	-0.0136	-0.0045	0.0328	22.3272	1.2661	-0.0028	0.0683	99.3218	44.43	62.6787	0.622605
355	K6_L5C4	0.0089	21.8247	52.478	0.8005	0.7047	0.0271	-0.0293	0.0656	22.1201	1.3682	-0.0112	-0.0581	99.3978	46.45	62.8222	0.623362
355	K6_L5C4	0.0038	21.806	52.6607	0.6919	0.7476	-0.0136	0.0023	0.1074	22.0716	1.2929	-0.0042	-0.0854	99.3842	48.47	62.7956	0.624409
355	K6_L5C4	-0.0139	21.8847	52.2631	0.772	0.6873	-0.0203	-0.0023	0.0894	22.2821	1.3871	-0.0042	0.0034	99.3691	50.49	62.745	0.622203
355	K6_L5C4	0.0114	21.9426	53.1224	0.6484	0.7825	0.0068	0.0496	0.1283	22.2628	1.2933	-0.0126	0.0307	100.279	52.51	62.7034	0.62396
355	K6_L5C4	0.0177	21.8529	52.61	0.7332	0.8274	0.0136	0.0023	0.0388	21.9665	1.1426	-0.0014	0.0103	99.2151	54.53	62.8487	0.627503
355	K6_L5C4	0.0139	21.7065	52.5641	0.9298	0.7922	0.0068	0.0068	0.1223	22.2143	1.2669	0.0098	0.0034	99.6369	56.55	62.4864	0.62217
355	K6_L5C4	0.0152	21.5603	51.9466	1.0632	0.8576	-0.0339	-0.0135	0.1461	22.1024	1.2497	-0.0182	0.0171	98.9582	58.57	62.3563	0.621878
355	K6_L5C4	0.0241	21.4375	52.097	1.4091	0.9137	0	-0.018	0.1878	22.4454	1.2266	-0.021	-0.058	99.7412	60.59	61.8046	0.617331
355	K6_L5C4	0.0165	21.5243	52.2675	1.2194	0.9396	-0.0068	0.0113	0.1133	22.3874	1.1971	-0.0308	-0.0102	99.6762	62.6	61.9248	0.619161
355	K6_L5C4	0.0266	21.7711	51.5334	1.0612	0.8871	-0.061	0.0203	0.1402	22.0955	1.2302	-0.0322	0.0068	98.7723	64.62	62.5532	0.624431
355	K6_L5C4	0.0506	21.7504	52.3698	0.8288	0.925	-0.0271	-0.0045	0.0806	21.969	1.3259	0.0336	0.0068	99.3404	66.64	62.6097	0.624506
355	K6_L5C4	0.0354	21.8785	52.7901	0.6989	0.8834	0.0136	0.0158	0.1552	22.0461	1.1521	0.0267	0.0991	99.7948	68.66	62.723	0.626877
355	K6_L5C4	0.0329	21.9106	52.4612	0.6053	0.9477	0.0203	0.0023	0.1702	21.9198	1.1229	-0.0042	0.0307	99.2239	70.68	62.8016	0.628794
355	K6_L5C4	0.0303	22.0622	52.4226	0.6743	0.8421	-0.0136	0.0045	0.1403	21.8525	1.3031	0.0323	0.0615	99.4258	72.7	63.1674	0.62924
355	K6_L5C4	0.0354	21.9802	52.8553	0.6683	0.8542	0.0407	0.009	0.1433	21.9553	1.0834	0.0182	-0.1196	99.6435	74.72	62.9608	0.629579
355	K6_L5C4	0.0202	22.1631	52.222	0.6405	0.7635	0.0203	0	0.1253	21.9473	1.2963	0.0126	-0.0307	99.2112	76.74	63.2795	0.629421
355	K6_L5C4	0	22.0641	52.8806	0.5962	0.7828	0.0339	0	0.1105	22.0049	1.1197	0.0042	-0.0171	99.597	78.76	63.092	0.629596
355	K6_L5C4	-0.0013	22.1374	52.7651	0.7119	0.7558	0.0407	-0.018	0.0597	22.0746	1.0831	0.028	-0.0478	99.6562	80.78	63.1337	0.63004
355	K6_L5C4	0.0316	22.08	53.0056	0.7478	0.7302	-0.0271	0.0023	0.1164	21.9841	1.2578	-0.0042	-0.0171	99.9557	82.8	63.1981	0.628566
355	K6_L5C4	0.0392	22.092	52.1084	0.6821	0.7628	0	-0.0225	-0.009	21.911	1.27	0.0364	-0.0273	98.902	84.82	63.2426	0.629303
355	K6_L5C4	0.0076	22.1161	52.9281	0.5999	0.7069	-0.0271	0.0045	0.0358	21.9291	1.2277	-0.0112	0.0683	99.6241	86.84	63.3223	0.629806
355	K6_L5C4	0.0114	22.1081	53.2572	0.5631	0.8232	0	0.0383	0.0777	21.8177	1.2218	0.0211	-0.0205	99.9395	88.86	63.2757	0.630905
355	K6_L5C4	0.0265	22.125	53.8494	0.5846	0.7627	0.0068	0	0.0986	21.9289	1.2287	0.0084	-0.0513	100.62	90.88	63.2592	0.629892
355	K6_L5C4	-0.0114	22.1318	53.088	0.6465	0.7504	-0.0475	-0.0158	0.0836	21.9907	1.2834	0.0084	-0.041	99.9828	92.9	63.2197	0.628787
355	K6_L5C4	0.0341	22.1852	53.1554	0.6125	0.7356	0.0339	-0.0473	0.0358	22.0044	1.2543	0.0323	-0.0273	100.084	94.92	63.281	0.629507
355	K6_L5C4	0.0227	22.1438	53.3221	0.6501	0.7283	0.0271	0.0135	0.0507	22.0723	1.2507	0.0154	0.0615	100.358	96.94	63.1784	0.628428
355	K6_L5C4	0.0417	22.2197	53.0809	0.5496	0.719	-0.0204	-0.0023	0.0329	21.9402	1.1924	0.0056	0.0273	99.8093	98.95	63.4038	0.631143
355	K6_L5C4	0.0114	22.1575	53.0476	0.5312	0.7507	0.0204	-0.0023	0.1672	21.8318	1.248	-0.0084	-0.0478	99.7658	100.97	63.4076	0.631015
355	K6_L5C4	0.0114	22.2161	53.5626	0.5127	0.7224	0.0068	0.0226	0.1374	21.8873	1.1958	0.0239	0.0034	100.302	102.99	63.4493	0.631603
355	K6_L5C4	-0.0025	22.2948	52.9207	0.4845	0.7055	0	-0.0135	0.0597	21.8433	1.1299	-0.0028	0.0034	99.4418	105.01	63.598	0.633542
355	K6_L5C4	0.0152	22.2625	52.5119	0.427	0.7684	-0.0475	0.0203	0.0597	21.9135	1.1917	-0.0028	-0.0068	99.1702	107.03	63.4113	0.631867
355	K6_L5C4	0.0013	22.0737	52.5867	0.4783	1.0933	0.3455	0.0045	0.0956	21.6544	1.2414	-0.0323	0.0137	99.5883	109.05	63.0543	0.631995
355	K6_L5C4	0.0164	22.2063	53.1623	0.5419	0.7639	0.0543	0.0316	0.0925	21.9287	1.2343	-0.0098	-0.0752	100.032	111.07	63.3431	0.630692
355	K6_L5C4	0.0063	22.2511	52.4258	0.5121	0.7567	0.0203	0.0045	0.1194	21.9562	1.2048	-0.0182	-0.0205	99.2573	113.09	63.3713	0.631185
355	K6_L5C4	0.0265	22.2014	52.983	0.5998	0.7497	0.0271	0.0248	0.0567	21.9622	1.2081	0.0295	0	99.8687	115.11	63.3224	0.63057
355	K6_L5C4	0.0088	22.155	53.3252	0.5347	0.7078	-0.0136	0.018	0.1313	22.0882	1.2115	-0.0238	-0.0342	100.18	117.13	63.2006	0.628784
355	K6_L5C4	0.0152	22.183	52.2924	0.4452	0.7522	0.0407	0.0045	0.0477	22.0308	1.1356	0.0266	-0.0068	98.9738	119.15	63.2305	0.630426
355	K6_L5C4	-0.0164	22.1925	53.1035	0.5404	0.748	0.0136	0.0158	0.1134	21.9923	1.3399	-0.0295	-0.0034	100.059	121.17	63.2848	0.628837
355	K6_L5C4	-0.0202	22.2375	53.4298	0.412	0.7443	0.0543	-0.0135	0.1075	22.1319	1.2837	-0.0196	0.0205	100.421	123.19	63.1957	0.628485
355	K6_L5C4	-0.0139	22.365	52.5603	0.4724	0.8069	0.0475	0.009	0.1732	21.8564	1.2644	-0.0112	-0.0273	99.555	125.21	63.5257	0.632768
355	K6_L5C4	-0.0038	22.3394	52.9684	0.4521	0.7141	-0.0271	-0.0203	0.0925	21.8506	1.3136	0.0196	0.0308	99.7811	127.23	63.6257	0.63206
355	K6_L5C4	0	22.2871	53.2935	0.4537	0.7239	-0.0068	-0.0023	0.0746	21.9722	1.3036	-0.0435	0.0376	100.146	129.25	63.4352	0.630398
355	K6_L5C4	0.0126	22.2928	53.2133	0.5587	0.741	-0.0068	-0.009	0.0478	22.1144	1.1919	-0.0407	0.0615	100.234	131.27	63.2754	0.630167
355	K6_L5C4	0.0429	22.3072	53.1515	0.3996	0.7098	0.0068	0.0023	0.0717	21.8303	1.1394	-0.0056	-0.1025	99.6614	133.29	63.6185	0.633705
355	K6_L5C4	0.0379	22.2841	52.9037	0.4377	0.7261	-0.0272	-0.0158	0.0358	21.8415	1.1694	0.014	0.0034	99.4536	135.31	63.5619	0.633045
355	K6_L5C4	0.0227	22.3444	53.3775	0.4535	0.7107	0.0407	0.0113	0.0627	21.8642	1.248	0.0028	-0.0103	100.138	137.33	63.6214	0.632643
355	K6_L5C4	0.024	22.3426	52.9811	0.4305	0.6909	0	-0.0158	0.1015	21.8754	1.3267	0.0112	0.0171	99.8009	139.35	63.634	0.631712
355	K6_L5C4	0.0189	22.3234	52.8578	0.4086	0.7391	0.0068	0.0248	0.1493	21.6555	1.2513	0.0211	-0.0478	99.4566	141.37	63.7753	0.634495
355	K6_L5C4	0.0417	22.4093	52.581	0.4436	0.6952	-0.0204	-0.0023	0.0448	21.9255	1.2146	0.0056	-0.041	99.3612	143.38	63.6465	0.633041
355	K6_L5C4	0.0013	22.3499	53.4036	0.3813	0.7839	-0.0136	0.0113	0.0418	21.8064	1.3599	0.0309	0.0103	100.18	145.4	63.5906	0.632143
355	K6_L5C4	-0.019	22.4029	52.077	0.3154	0.7623	0.0543	0.0406	0.0478	21.8977	1.205	-0.0168	0.0171	98.8199	147.42	63.5809	0.633351
355	K6_L5C4	0.034	22.3034	52.8897	0.524	0.7392	0.0204	0.009	0.1015	21.6944	1.1823	-0.0323	-0.0068	99.4979	149.44	63.7147	0.634601
355	K6_L5C4	-0.0013	22.3813	53.0102	0.4575	0.7568	0	-0.0203	0.1105	21.7959	1.2278	0.0154	0.1332	99.8885	151.46	63.669	0.633919
355	K6_L5C4	0.0177	22.463	52.3038	0.4562	0.7496	0.0271	-0.0293	0.0955	21.7686	1.172	-0.0112	0.0239	99.0775	153.48	63.7903	0.635609
355	K6_L5C4	0.0379	22.3805	52.3232	0.3839	0.7611	0.0339	0	0.0895	21.8844	1.2506	0.0323	0.0205	99.1979	155.5	63.5728	0.632789
355	K6_L5C4	0.0189	22.3557	53.3796	0.3524	0.7444	-0.0339	-0.0068	0.0866	21.8251	1.3561	-0.0449	-0.0752	100.119	157.52	63.629	0.632054
355	K6_L5C4	0.0278	22.377	53.0947	0.4467	0.7696	0.0271	0.0135	0.1165	21.9325	1.2843	-0.0084	0.0137	100.103	159.54	63.5095	0.631928
355	K6_L5C4	0.0038	22.4359	53.1129	0.4035	0.7547	-0.0407	0.0158	0.1075	21.8411	1.3175	0.0056	0.0718	100.07	161.56	63.6822	0.633118
355	K6_L5C4	-0.0101	22.4384	52.6904	0.3818	0.6757	0	-0.0068	0.1194	21.7392	1.1328	-0.0182	0.0171	99.1949	163.58	63.8914	0.636053
355	K6_L5C4	0.0076	22.4929	52.7346	0.3872	0.7617	0.0204	0.0135	0.0866	21.6218	1.2122	0.0267	0.0308	99.396	165.6	63.9547	0.636988
355	K6_L5C4	0.0126	22.3484	52.7672	0.4105	0.7433	-0.0339	-0.0068	0.1134	21.7626	1.2145	0.0224	0.0717	99.4667	167.62	63.6864	0.634049
355	K6_L5C4	0.0088	22.4887	53.0525	0.369	0.7712	-0.0068	-0.0023	0.1105	21.7419	1.3267	0.007	0.0786	99.955	169.64	63.8158	0.634565
355	K6_L5C4	-0.0013	22.4015	53.1231	0.3471	0.714	0.0204	-0.0045	0.0925	21.7615	1.2181	0.007	0.0512	99.7364	171.66	63.7806	0.634574
355	K6_L5C8	-0.0027	4.1985	17.3896	1.2393	0.2834	-0.012	0.002	0.0549	17.0409	0.5407	-0.0322	0.0123	40.7616	0	30.0709	0.298496
355	K6_L5C8	0.0088	13.6705	43.4581	0.7007	0.5948	0.0183	-0.0041	0.0453	28.8757	1.0376	-0.0432	-0.0526	88.41	2.06	45.1215	0.448815
355	K6_L5C8	-0.0074	16.3757	48.5051	0.8039	0.5628	-0.0122	0.0122	0.1152	28.8267	1.0885	-0.0274	-0.0248	96.2902	4.11	49.6959	0.493754
355	K6_L5C8	0.0137	15.3402	47.0835	2.0583	0.4635	0.0244	0.0081	0.0826	30.285	0.9569	0.0148	-0.0433	96.331	6.17	46.9651	0.466643
355	K6_L5C8	0.0194	18.3687	48.6401	1.3517	0.5876	-0.0245	-0.0102	0.2203	26.9381	1.2652	0.0125	-0.1023	97.4036	8.23	54.18	0.537102
355	K6_L5C8	0.0407	21.1522	49.5178	1.1529	0.7226	-0.0185	0.0102	0.4664	22.2182	1.2328	0.0433	0.0839	96.641	10.28	61.9648	0.616379
355	K6_L5C8	0.0035	21.4941	49.7764	0.7231	0.7192	0.0062	0	0.2925	22.2184	1.1385	-0.014	-0.0279	96.3718	12.34	62.3462	0.621121
355	K6_L5C8	0.0116	21.6612	49.5128	0.6034	0.7012	0	0.0348	0.1136	22.2875	1.2718	-0.0229	-0.0217	96.1978	14.4	62.4813	0.620897
355	K6_L5C8	-0.0035	21.6393	49.7081	0.6603	0.8343	0.0123	0.0184	0.0757	22.3076	1.2354	0	0.0465	96.5379	16.45	62.2654	0.620827
355	K6_L5C8	0.022	21.5851	49.6593	0.7062	0.8313	-0.0246	-0.0307	0.0839	22.0955	1.3104	0.0038	0.0031	96.3006	18.51	62.4244	0.6216
355	K6_L5C8	-0.0232	21.7161	49.6367	0.73	0.8766	0.043	-0.0164	0.1949	22.2642	1.251	-0.0178	-0.0341	96.7124	20.57	62.3377	0.621936
355	K6_L5C8	0.0127	21.734	49.5928	0.5773	0.8543	-0.0368	0.0041	0.1054	22.1796	1.2519	0.0482	0.0186	96.3788	22.62	62.4709	0.622967
355	K6_L5C8	0.0173	21.8771	49.255	0.6221	0.8853	0.0245	0.002	0.081	22.076	1.2661	0.0076	0.034	96.1481	24.68	62.6889	0.625401
355	K6_L5C8	0.0242	21.8747	49.2853	0.5885	0.7787	0.0184	-0.0163	0.143	21.9475	1.3392	0.0038	0.0402	96.0435	26.73	62.9546	0.625922
355	K6_L5C8	0.0035	21.949	48.502	0.5799	0.7497	0.0429	0.0082	0.0728	22.1284	1.2142	-0.0215	0.0062	95.2567	28.79	62.888	0.626171
355	K6_L5C8	0.0092	19.4793	42.4954	0.5383	7.0537	5.5617	0.0141	0.0681	19.7562	1.1436	0.0051	0.0864	96.2111	30.85	54.6679	0.624094
355	K6_L5C8	0.0092	20.6538	44.8701	0.7706	4.4457	3.2107	-0.0041	0.0896	20.9186	1.1222	-0.0026	0.0093	96.0998	32.9	58.042	0.625369
355	K6_L5C8	0.0346	21.7485	48.3222	0.9285	0.8013	0.0306	0.0122	0.1725	22.1207	1.1182	0.0101	0.0742	95.3736	34.96	62.6145	0.625076
355	K6_L5C8	0.0196	21.8293	47.8682	1.0054	0.812	0.0306	-0.002	0.07	22.3255	1.224	-0.0139	0.0093	95.194	37.02	62.4813	0.622819
355	K6_L5C8	0.0266	21.9035	47.5334	0.7391	0.7953	0.0122	-0.0407	0.0485	22.1981	1.1057	0.0455	0.0185	94.4263	39.07	62.7103	0.626088
355	K6_L5C8	-0.0092	22.0282	48.4624	0.6372	0.7138	0.0245	0.002	-0.0081	22.1193	1.3157	0.0013	0.0834	95.3877	41.13	63.0277	0.626077
355	K6_L5C8	0.0115	22.0125	48.6167	0.6993	0.6696	0.0306	-0.002	0.0835	22.0044	1.2955	0.024	-0.0401	95.4477	43.19	63.1852	0.627264
355	K6_L5C8	0.0138	22.0507	47.739	0.6424	0.7181	0.0489	-0.0183	0.0484	22.0541	1.1786	-0.0391	-0.0278	94.4941	45.24	63.112	0.628359
355	K6_L5C8	0.0506	22.175	47.6635	0.5765	0.6825	0.0245	0.0081	0.043	21.9485	1.1902	-0.0038	-0.0031	94.3623	47.3	63.3961	0.630613
355	K6_L5C8	0.0264	22.2524	48.1935	0.4901	0.7487	0.0428	-0.0346	0.0619	21.9217	1.1668	0.0328	0.0216	94.9588	49.36	63.418	0.631932
355	K6_L5C8	0.0219	22.286	47.7263	0.5022	0.6846	0.0183	-0.0284	0.0645	21.9964	1.2164	0.0177	-0.0062	94.5342	51.41	63.4606	0.631028
355	K6_L5C8	0.0173	22.3111	47.8754	0.4676	0.6695	0.0245	0.0061	0.0538	21.919	1.2254	-0.058	-0.0709	94.5695	53.47	63.5849	0.631975
355	K6_L5C8	0.0172	22.314	46.746	0.4684	0.6733	-0.055	0	0.0833	21.6334	1.1392	-0.0126	0.0832	93.1581	55.53	63.8745	0.635773
355	K6_L5C8	-0.0092	22.2709	47.2702	0.5549	0.7113	-0.0366	0.0061	0.0886	21.8563	1.239	-0.0076	0.0062	94.0035	57.58	63.5524	0.632048
355	K6_L5C8	0.0207	22.3576	47.2245	0.5024	0.7131	0.0427	-0.0102	0.1102	21.7583	1.1949	-0.005	-0.0616	93.9243	59.64	63.7398	0.634388
355	K6_L5C8	0.0459	22.357	46.9467	0.4414	0.6817	0.0549	0.0528	0.0376	21.7545	1.2036	0.0126	0.0031	93.5918	61.7	63.784	0.634332
355	K6_L5C8	0.0184	22.2691	47.1932	0.4509	0.6427	-0.0427	0.0223	0.0483	21.7727	1.1732	-0.0353	-0.077	93.5907	63.75	63.7255	0.633545
355	K6_L5C8	0.031	22.3859	46.6374	0.4264	0.6617	0.0366	0	0.0778	21.6302	1.0575	-0.0189	-0.0308	92.9444	65.81	63.9672	0.637391
355	K6_L5C8	-0.0023	22.3521	47.5451	0.4506	0.7183	0.0122	-0.0142	0.1208	21.8253	1.1676	-0.0164	0.0339	94.2258	67.86	63.6591	0.633934
355	K6_L5C8	0.023	22.3445	46.5136	0.4488	0.7337	0	-0.0162	0.0242	21.8238	1.2682	0.0239	-0.0739	93.2037	69.92	63.6327	0.632844
355	K6_L5C8	0.0103	22.2411	46.8919	0.4395	0.7312	0.0305	-0.0162	0.0698	21.7017	1.218	0	0.0062	93.3402	71.98	63.653	0.633512
355	K6_L5C8	0.0023	22.2579	46.8082	0.3985	0.7224	0.0183	-0.002	0.0242	21.7876	1.1648	-0.0038	0	93.1841	74.03	63.5944	0.633363
355	K6_L5C8	0.0034	22.3143	46.4869	0.4994	0.7468	0.0488	0	0.1047	21.8639	1.1582	0.0164	-0.0031	93.2427	76.09	63.5436	0.633248
355	K6_L5C8	0.0311	22.2851	46.5957	0.4052	0.7621	0.0183	0.0264	0.059	21.8157	1.2084	0.0201	-0.0585	93.2272	78.15	63.5423	0.632917
355	K6_L5C8	0.0173	22.2847	46.4611	0.4882	0.798	0.0244	-0.002	0.1074	21.7528	1.2242	0.0063	0.037	93.2014	80.2	63.559	0.633386
355	K6_L5C8	0.0138	22.2592	46.1198	0.5414	0.7833	0.0061	-0.002	0.0349	21.7141	1.2326	-0.0025	0.0246	92.7298	82.26	63.5911	0.633426
355	K6_L5C8	0.0012	22.1558	45.8949	0.6846	0.7409	-0.0061	0.0061	0.1313	21.888	1.3072	-0.005	-0.0369	92.8098	84.32	63.3614	0.629828
355	K6_L5C8	0.0449	22.1453	45.6269	0.7002	0.7653	-0.0061	0	0.0483	21.8537	1.2456	0.0163	-0.0369	92.4466	86.37	63.3535	0.63069
355	K6_L5C8	0.0012	22.0601	46.0229	0.7572	0.7425	0.0061	0.0122	0.0724	21.8324	1.1428	-0.0075	0.0677	92.7174	88.43	63.3154	0.63106
355	K6_L5C8	0.0127	21.973	45.4715	0.6933	0.8112	0	-0.0061	0.1314	21.8741	1.113	0.0075	0.0062	92.0938	90.49	63.0914	0.630021
355	K6_L5C8	0.0358	21.9919	45.2735	0.7963	0.7216	0.0243	0.0162	0.1232	21.9444	1.3219	0.0151	-0.0154	92.2643	92.54	63.1567	0.627379
355	K6_L5C8	0.0496	21.9361	45.2862	0.8671	0.7448	0.0061	0.004	0.1366	21.9518	1.174	-0.0301	-0.0584	92.1563	94.6	63.0597	0.628219
355	K6_L5C8	0.0185	22.0149	45.3675	0.9073	0.757	-0.0061	0.0041	0.0884	22.1188	1.2776	-0.0025	0.0277	92.5816	96.66	62.9582	0.626326
355	K6_L5C8	0.0046	21.9917	44.8537	0.8091	0.7855	0.0426	0.002	0.1125	22.1416	1.3451	0.0138	0.0461	92.1482	98.71	62.8738	0.625169
355	K6_L5C8	0.0081	21.9313	44.6701	0.8286	0.7737	0	0.0121	0.0348	21.9013	1.2538	-0.0138	0.0092	91.4231	100.77	63.0684	0.627862
355	K6_L5C8	0.0427	22.0018	44.7881	0.7838	0.83	-0.0182	-0.004	0.1017	22.1708	1.1733	-0.005	-0.0184	91.8923	102.83	62.7977	0.626723
355	K6_L5C8	-0.0023	21.9662	44.8602	0.8102	0.8129	-0.0122	-0.0202	0.0295	22.0071	1.2092	0.0063	-0.0646	91.7016	104.88	62.9471	0.627623
355	K6_L5C8	0.0208	21.8653	44.4171	0.7788	0.8277	-0.0304	0.0182	0.083	22.0231	1.0553	-0.0188	0.0184	91.1076	106.94	62.8043	0.627958
355	K6_L5C8	0.0104	21.8947	44.561	0.8234	0.8391	-0.0122	0.0081	0.1339	21.9115	1.156	0.0025	0.0523	91.3929	109	62.9339	0.628369
355	K6_L5C8	0.0289	21.93	44.2279	0.7498	0.8409	-0.0122	0.0202	0.1177	22.1167	1.1994	0.01	-0.0461	91.2417	111.05	62.7617	0.626235
355	K6_L5C8	0.0127	21.8787	44.1183	0.781	0.8731	0	0.0364	0.0616	21.8829	1.2232	0.005	-0.0492	90.8728	113.11	62.9017	0.627799
355	K6_L5C8	-0.0069	21.9601	44.5842	0.7821	0.8152	-0.0061	0	0.0804	21.8074	1.1976	0.0238	-0.0061	91.2508	115.17	63.1404	0.629692
355	K6_L5C8	0.0069	21.9556	44.3766	0.7818	0.833	0.0243	-0.0445	0.1071	21.8875	1.1582	-0.0163	0.0154	91.1464	117.22	63.031	0.629237
355	K6_L5C8	0.0162	21.8692	44.2491	0.7392	0.8145	0	0.0061	0.1204	21.8378	1.2497	-0.0301	0.0369	90.9389	119.28	63.0137	0.627882
355	K6_L5C8	0.0346	21.8548	44.1248	0.8736	0.8413	0.0182	-0.0162	0.0482	21.712	1.2944	-0.0251	-0.0522	90.8019	121.34	63.0917	0.628544
355	K6_L5C8	-0.0046	21.9285	44.0544	0.831	0.7728	-0.0061	-0.0182	0.1151	21.9624	1.2142	-0.0113	0.0399	90.9183	123.39	63.0044	0.62762
355	K6_L5C8	-0.0069	21.9201	44.1126	0.8189	0.8255	0.0486	-0.0121	0.0321	21.928	1.2167	0.0163	-0.0491	90.9187	125.45	62.9619	0.627852
[truncated: 819 more rows]

## Sheet: All opx profiles Dacites
500 µm	ZM							ZS																	355 µm	ZM													ZS
[truncated: 2 more rows]

## Sheet: Melted opx Dacite
Names	SiO2	TiO2	Al2O3	Cr2O3	FeO	MnO	MgO	CaO	Na2O	K2O	P2O5	NiO	Total	Nature	Mineral	Localisation	En	Mg#
[truncated: 10 more rows]
