# Supplementary material for: Insights Into Volcanic Unrest by Correlating Petrological and Seismic Observations at Kizimen (Kamchatka, Russia)
Source: Research Square preprint supplement (doi:10.21203/rs.3.rs-1140681/v1), 2022-03-10
Supplement: Supplementary file 4 [file 9b8de80e92f397b293da987b.xlsx]

## Sheet: Fe-Ti oxides
Fe-Ti oxides compositions
Sample name	K8_250_L3C20_1	K8_250_L3C20_2	K8_250_L4C9_1	K8_250_L4C9_2_a	K8_250_L4C17_1	K8_250_L4C17_2	K8_250_L5C21_1	K8_250_L5C21_2	K8_250_L7C2_1	K8_250_L7C2_2	K8_250_L7C19_1	K8_250_L7C19_2	K9_250_L9C30_1	K9_250_L9C30_2	K9_250_L13C9_1	K9_250_L13C9_2	K9_250_L14C6_1	K9_250_L14C6_2	K9_250_L14C13_2	K9_250_L14C13_1	K5_250_L1C1_1	K5_250_L1C1_2	K5_250_L2C6_1	K5_250_L2C6_2	K5_250_L3C3_1	K5_250_L3C3_2	K5_250_L3C7_1	K5_250_L3C7_2	K5_250_L3C7_1	K5_250_L3C7_2	K5_250_L3C12_1	K5_250_L3C12_2	K5_250_L3C20_1	K5_250_L3C20_2	K5_250_L3C22_1	K5_250_L3C22_2	K5_250_L4C27_1	K5_250_L4C27_2	K5_250_L5C4_1	K5_250_L5C4_2	K5_250_L6C11_1	K5_250_L6C11_2	K5_250_L6C12_1	K5_250_L6C12_2	K5_250_L7C32_1	K5_250_L7C32_2	K6_250_L9C16_1	K6_250_L9C16_2	K6_250_L12C11_1
Mineral	Mgt	Ilm	Mgt	Ilm	Mgt	Ilm	Mgt	Ilm	Mgt	Ilm	Mgt	Ilm	Mgt	Ilm	Mgt	Ilm	Mgt	Ilm	Ilm	Mgt	Ilm	Mgt	Mgt	Ilm	Mgt	Ilm	Mgt	Ilm	Mgt	Ilm	Mgt	Ilm	Mgt	Ilm	Mgt	Ilm	Mgt	Ilm	Mgt	Ilm	Mgt	Ilm	Mgt	Ilm	Mgt	Ilm	Mgt	Ilm	Mgt
Na2O	0.0180667	0.0210667	0.04595	0.00245	0.0216	0.0124667	0.0304333	0.0231	-0.0105333	-0.00625	-0.0118	0.0356	0.0170667	0.00726667	0.0139	0.0355	0.03175	0.0163	0.0308	-0.0352	0.00315	0.0187333	0.0184	-0.00805	0.0188333	-0.0032	0.011	-0.00565	0.0110333	0.0161	0.00973333	0.0105667	0.0103	0.0192	0.0328333	-0.0016	0.0252	0.0273	-0.0118667	0.00666667	0.0158667	0.0398	0.011	0.1078	0.0144	0.0361	0.0323667	0.02065	0.0330333
MgO	1.18343	1.56827	1.7455	2.8812	1.24457	2.36013	2.77257	3.66373	1.4347	2.3439	1.504	2.9384	1.2461	2.15547	1.43785	2.43893	1.2169	1.883	4.89425	2.387	2.07395	1.33363	1.5772	2.16405	1.26117	2.2855	1.4321	1.92405	1.3112	1.827	1.2284	2.1179	1.35627	1.87275	1.2927	2.0344	1.25477	1.84833	1.497	2.53557	1.4196	2.19947	1.49993	2.1332	2.55263	3.065	1.04117	1.80865	1.15273
SiO2	0.0631333	0.0182667	0.0623	0.0301	0.0282333	0.0212	0.0497	0.0410333	0.0223667	0.0485	0.029	0.0052	0.0641333	-0.00923333	0.00365	-0.022	0.06915	0.0052	0.053	0.0382	0.00385	0.0257	0.0295333	-0.02085	0	-0.00155	0.0209	0.00155	0.0576	0.02085	0.0451667	0.0426667	0.0241333	0.17185	0.0635	0.02735	0.0460333	0.00463333	0.0368	-0.00413333	0.0482333	0.0232333	0.0808333	1.24583	0.0738667	-0.0255	0.0476667	0.0124	0.158233
Al2O3	1.777	-0.0362333	1.695	-0.0554	1.64917	-0.00766667	2.33943	0.126533	1.83653	0.0597	1.7876	-0.0096	1.6798	-0.0467	1.71705	0.0308667	1.97075	-0.02125	0.12255	2.3244	-0.0378	1.5342	1.4074	-0.06365	1.75563	-0.1194	1.3504	-0.0593	1.55043	-0.1118	1.70543	-0.0698667	1.5374	-0.12605	1.54133	-0.068	1.65767	-0.0699333	1.90817	-0.0445333	1.78923	-0.0976	1.50687	-0.0212	1.8688	-0.0017	1.61967	-0.1543	1.3773
CaO	0.00946667	0.026	0.04435	0.0373	0.0193667	0.0564667	0.0473667	0.0822667	0.0306	0.0295	0.057	0.016	0.0047	0.0095	0.05365	0.0847667	0.0089	0.0033	0.0293	-0.0022	0.0371	0.0158333	0.0125667	0.0394	0.00133333	0.00555	0.0468667	0.0413	0.0152	0.02475	0.0215667	0.0695667	0.0276	3.1433	0.0418333	0.1428	0.0205	0.0198667	0.0367	0.0438	0.0387	0.0248	0.0135333	0.0669	0.162567	0.0105	0.0313667	0.01645	0.145033
P2O5	-0.0309667	0.0269333	0.0023	0.009	0.00503333	0.0065	0.0209667	-0.00496667	0.0222	0.05205	0.0666	-0.0744	0.0375333	0.0214333	-0.0128	0.00496667	0.04105	0.03475	0.00745	0.0308	0.0244	0.0168	0.0166667	0.0288	0.0336	-0.02435	0.0151333	0.0044	0.00763333	-0.00445	0.0046	-0.0320333	0.0327667	2.774	0.00133333	-0.0067	0.0150667	0.0044	0.0226	0.0246667	0.0462667	0.00426667	0.0248667	0.027	0.0462	-0.0338	0.0664667	0.01035	0.0172667
K2O	0.0066	-0.00886667	0.0036	-0.0142	0.0175667	0.0174	0.0199	0.00196667	0.0104667	0.0068	-0.0118	-0.0641	0.0281333	0.00646667	-0.00495	0	0.0226	0	0.0049	0.0354	-0.02255	0.0128333	-0.00993333	0.01215	-0.00176667	0.01045	0.0111	0.0295	0.00233333	-0.013	-0.0004	-0.0035	-0.00693333	-0.0034	0.0169333	-0.02	-0.0034	-0.0143	-0.0172	-0.00706667	-0.00166667	0.00806667	0.0103	0.0342333	-0.0199333	0.0048	-0.0298667	0.00155	-0.00213333
TiO2	7.35257	39.7729	7.32715	41.6283	6.96107	41.1066	12.2192	40.6982	7.07423	39.4918	7.4	41.0132	6.7627	40.7456	7.12495	39.9657	5.6371	38.3165	41.1257	7.1965	41.7199	11.1433	12.9921	40.4018	7.34107	41.611	12.1101	40.9424	10.7418	40.4588	9.23083	44.0719	11.608	40.6895	9.9889	44.0093	10.1759	42.0267	7.81043	43.5327	8.13367	42.9037	12.6234	43.6345	11.7384	40.7905	10.4069	46.7478	13.6326
FeO	82.8159	53.4021	82.3515	51.1172	83.1535	51.3699	76.5825	51.1365	82.6849	52.7498	82.6836	51.2914	82.4704	52.4009	82.2722	52.2879	83.9819	54.0049	48.8274	80.6661	52.3441	80.3029	78.0196	52.6845	83.6058	52.1907	79.3931	52.4778	80.0257	53.5947	83.1881	51.9558	80.8775	49.6119	82.4074	52.4699	82.1857	53.9505	84.6548	52.8512	84.611	53.7171	80.4643	52.1015	79.624	54.0638	82.4656	48.5661	79.8516
MnO	0.608533	0.607567	0.47645	0.61605	0.578867	0.752733	0.443667	0.4356	0.5413	0.7337	0.4918	0.613	0.6006	0.7201	0.45535	0.534633	0.54445	0.62845	0.6206	0.3681	0.5291	0.5732	0.607233	0.5471	0.482433	0.57115	0.565633	0.55675	0.545133	0.4824	0.500867	0.645067	0.535567	0.53745	0.578567	0.6692	0.609933	0.684333	0.479667	0.512167	0.5191	0.5667	0.629733	0.6537	0.362567	0.352	0.4784	0.79505	0.523767
Cr2O3	0.0868	0.0127667	0.08495	0.0432	0.0972667	0.0248	0.0587333	0.0349	0.0769333	0.02175	0.1161	0.0129	0.0928	0.0102667	0.07395	-0.00173333	0.0674	0.0559	0.0221	0.0821	0.0263	0.0698333	0.084	0.02245	0.0915667	0.0069	0.0532667	0.00575	0.0948667	0.01005	0.0909667	0.0292333	0.0701	0.0367	0.0816667	-0.0018	0.0948	0.0406	0.0797333	0.0302667	0.0926667	0.0276	0.0754	0.00956667	0.0513	0.0144	0.0877	0.0052	0.0713667
NiO	0.0315667	0.0002	-0.02655	0.00595	-0.016	-0.00753333	0.00303333	-0.0434333	0.00963333	0.02115	0.0032	-0.0065	0.0193333	-0.0152	0.08215	-0.051	0.04995	0.0195	-0.0033	-0.0904	0	0.0220333	0.0019	-0.0044	0.0797	5e-05	-0.0191667	-0.03345	0.0384333	-0.01455	0.00896667	0.0216333	-0.00493333	0.03045	-0.0066	0.0284	0.0346667	0.0535667	0.0296	0.0139333	0.011	0.0247667	0.0380667	-0.0346	-0.0234333	-0.0162	0.0365333	-0.0121	0.0150333
Total	93.9719	95.559	93.8524	96.3804	93.7956	95.7464	94.6101	96.2683	93.7521	95.5721	94.1391	95.9257	93.036	96.1226	93.2692	95.3983	93.6448	95.0199	95.7623	93.1286	96.788	95.0993	94.8046	95.9401	94.6982	96.7475	95.0255	96.0025	94.419	96.4754	96.0823	99.0228	96.1109	98.922	96.0914	99.4105	96.1268	98.6735	96.5742	99.5829	96.7517	99.5909	96.9842	100.026	96.5302	98.337	96.3138	98.0169	97.0196
Fe-Ti oxides temperatures (Sauerzapf et al., 2008)
Sample	Sample name	T (°C)	∆NNO*	log fO2	n	Mean T (°C)	Standard deviation
Andesites	K9_250_L14C6_1	779.773	2.03536	-12.3058	23	847.293	56.6973
	K8_250_L4C17_1	788.977	1.63434	-12.5054
	K9_250_L9C30_1	790.405	1.68381	-12.425
	K5_250_L3C3_1	795.325	1.55571	-12.4471
	K5_250_L5C4_1	795.325	1.45503	-12.5478
	K8_250_L4C9_1	800.085	1.56641	-12.3348
	K9_250_L13C12_1	808.417	1.64215	-12.0835
	K8_250_L3C20_1	808.496	1.58062	-12.1434
	K5_250_L6C11_1	808.813	1.41825	-12.2991
	K8_250_L7C19_1	809.528	1.57776	-12.1247
	K8_250_L7C2_1	813.892	1.68485	-11.9269
	K5_250_L3C12_1	815.32	1.11558	-12.4666
	K9_250_L14C13_1	826.111	1.67116	-11.6904
	K5_250_L3C22_1	836.426	1.01776	-12.137
	K5_250_L4C27_1	867.688	1.11231	-11.4388
	K5_250_L3C20_1	884.192	0.865429	-11.3803
	K5_250_L1C1_2	889.111	0.965488	-11.1909
	K5_250_L3C7_1	896.729	1.07064	-10.949
	K5_250_L6C12_1	900.696	0.757639	-11.1914
	K5_250_L3C7_1	919.58	0.90833	-10.7115
	K5_250_L7C32_1	939.417	1.1014	-10.1837
	K8_250_L5C21_1	955.92	1.01517	-9.99977
	K5_250_L2C6_1	957.507	0.898632	-10.0907
Dacite	K6_250_L9C16_1	779.932	0.603422	-13.7343	3	832.353	37.0741
	K6_250_L13C17_1	857.69	0.307051	-12.4335
	K6_250_L12C11_1	859.436	0.295933	-12.4113
[truncated: 3 more columns]
