# Supplementary material for: Insights Into Volcanic Unrest by Correlating Petrological and Seismic Observations at Kizimen (Kamchatka, Russia)
Source: Research Square preprint supplement (doi:10.21203/rs.3.rs-1140681/v1), 2022-03-10
Supplement: Supplementary file 5 [file a5796f6c3c0075ccd216019d.xlsx]

## Sheet: Timescales opx Andesite ME1-ME2
Sample and fraction (µm)	Zonation type	Crystal	Zonation	Distance from rim (µm)	Length (µm)	Timescales (years)	Timescales (days)	σ + (years)	σ - (years)	En change
K8 355	MZ: inner to outer rim	K8_L8C3_2	Reverse	0	4	0.0290619	10.6149	0.295523	0.0264599	En62-64 to En64-73
K8 355	MZ: inner to outer rim	K8_L8C13	Reverse	0	1	0.0500653	18.2864	0.542096	0.0458325	En62-64 to En64-73
K9 500	MZ: inner to outer rim	K9_L6C14	Reverse	0	2	0.0892465	32.5973	1.07223	0.0823888	En62-64 to En64-73
K5 355	MZ: core to inner rim	K5_L5C19	Reverse	6	4	0.655511	239.425	5.46964	0.585359	En62-64 to En64-73
K5 355	MZ: core to inner rim	K5_L2C17	Reverse	64	8	7.11517	2598.82	86.7186	6.57564	En62-64 to En64-73
K5 500	MZ: core to inner rim	K5_L5C20	Reverse	44	6	61.9866	22640.6	785.543	57.453	En62-64 to En64-73
K8 355	SZ: core to rim	K8_L12C5	Reverse	2	1	0.0446385	16.3042	0.420753	0.0403569	En62-64 to En64-73
K8 355	SZ: core to rim	K8_L7C1	Reverse	0	2	0.0464794	16.9766	0.406418	0.0417094	En62-64 to En64-73
K5 355	SZ: core to rim	K5_L4C17	Reverse	4	2	0.0533651	19.4916	0.472748	0.0479521	En62-64 to En64-73
K5 250	SZ: core to rim	K5_L3C16	Reverse	0	2	0.0548898	20.0485	0.47192	0.0491706	En62-64 to En64-73
K9 355	SZ: core to rim	K9_L11C16	Reverse	0	2	0.0625697	22.8536	0.192697	0.0472329	En62-64 to En64-73
K5 125	SZ: core to rim	K5_L4C21	Reverse	0	4	0.0739169	26.9981	0.765356	0.0674068	En62-64 to En64-73
K5 355	SZ: core to rim	K5_L1C2	Reverse	4	1	0.0771826	28.1909	0.502404	0.0669043	En62-64 to En64-73
K8 355	SZ: core to rim	K8_L7C11	Reverse	0	2	0.0837712	30.5974	0.649799	0.0742048	En62-64 to En64-73
K9 355	SZ: core to rim	K9_L10C16	Reverse	4	10	0.114519	41.8282	0.360646	0.0869191	En62-64 to En64-73
K9 355	SZ: core to rim	K9_L7C4	Reverse	2	6	0.134779	49.2279	0.411904	0.101551	En62-64 to En64-73
K8 355	SZ: core to rim	K8_L7C12	Reverse	0	6	0.141357	51.6308	1.10094	0.125273	En62-64 to En64-73
K8 355	SZ: core to rim	K8_L7C21	Reverse	2	2	0.166093	60.6656	1.62964	0.150731	En62-64 to En64-73
K9 355	SZ: core to rim	K9_L9C11	Reverse	0	2	0.16911	61.7674	0.512917	0.127179	En62-64 to En64-73
K8 355	SZ: core to rim	K8_L7C10	Reverse	4	4	0.173838	63.4942	1.27205	0.152937	En62-64 to En64-73
K5 250	SZ: core to rim	K5_L5C34	Reverse	0	8	0.180094	65.7793	1.446	0.160148	En62-64 to En64-73
K9 500	SZ: core to rim	K9_L8C10	Reverse	4	6	0.1812	66.1833	2.14332	0.167075	En62-64 to En64-73
K8 355	SZ: core to rim	K8_L8C22	Reverse	6	1	0.183981	67.1991	1.21832	0.159843	En62-64 to En64-73
K9 355	SZ: core to rim	K9_L8C1	Reverse	0	2	0.211235	77.1537	0.670395	0.160624	En62-64 to En64-73
K5 250	SZ: core to rim	K5_L2C16	Reverse	2	2	0.22147	80.8919	2.15528	0.200833	En62-64 to En64-73
K5 355	SZ: core to rim	K5_L3C4	Reverse	0	4	0.227951	83.2591	1.95126	0.204107	En62-64 to En64-73
K8 355	SZ: core to rim	K8_L8C4	Reverse	6	2	0.247208	90.2927	1.72045	0.21615	En62-64 to En64-73
K9 500	SZ: core to rim	K9_L7C12	Reverse	2	4	0.299517	109.398	3.77358	0.277492	En62-64 to En64-73
K9 355	SZ: core to rim	K9_L12C6	Reverse	10	6	0.310128	113.274	1.00234	0.236846	En62-64 to En64-73
K9 355	SZ: core to rim	K9_L12C11	Reverse	6	4	0.339934	124.161	1.07295	0.258147	En62-64 to En64-73
K9 500	SZ: core to rim	K9_L7C17	Reverse	2	4	0.377001	137.7	4.62797	0.348604	En62-64 to En64-73
K9 355	SZ: core to rim	K9_L7C23	Reverse	8	6	0.385799	140.913	1.25925	0.295321	En62-64 to En64-73
K9 355	SZ: core to rim	K9_L10C9	Reverse	2	2	0.406046	148.308	5.10933	0.376153	En62-64 to En64-73
K8 500	SZ: core to rim	K8_L8C8	Reverse	0	2	0.435968	159.237	5.59062	0.404429	En62-64 to En64-73
K8 500	SZ: core to rim	K8_L8C15	Reverse	2	2	0.458028	167.295	5.66983	0.423793	En62-64 to En64-73
K9 355	SZ: core to rim	K9_L7C18	Reverse	5	8	0.565147	206.42	1.76644	0.428162	En62-64 to En64-73
K8 500	SZ: core to rim	K8_L6C14	Reverse	2	2	0.672796	245.739	8.51236	0.623515	En62-64 to En64-73
K8 125	SZ: core to rim	K8_L8C2	Reverse	0	6	0.847111	309.407	5.21617	0.72876	En62-64 to En64-73
K9 500	SZ: core to rim	K9_L6C16	Reverse	4	4	0.938748	342.878	11.5569	0.868224	En62-64 to En64-73
K9 355	SZ: core to rim	K9_L9C7	Reverse	6	4	0.988855	361.179	2.95373	0.740836	En62-64 to En64-73
K5 500	SZ: core to rim	K5_L3C10	Reverse	2	8	1.12077	409.361	4.29601	0.888875	En62-64 to En64-73
K8 500	SZ: core to rim	K8_L6C2	Reverse	2	6	1.1211	409.483	7.15864	0.969303	En62-64 to En64-73
K5 500	SZ: core to rim	K5_L5C8	Reverse	4	6	1.21937	445.374	4.95496	0.978554	En62-64 to En64-73
K8 500	SZ: core to rim	K8_L8C14	Reverse	2	2	1.55803	569.07	19.4795	1.44264	En62-64 to En64-73
K5 250	SZ: core to rim	K5_L3C18	Reverse	0	8	1.58855	580.219	11.6902	1.39851	En62-64 to En64-73
K9 500	SZ: core to rim	K9_L7C14	Reverse	0	2	1.6394	598.792	20.4049	1.51748	En62-64 to En64-73
K9 355	SZ: core to rim	K9_L9C3	Reverse	6	10	1.64897	602.285	5.06564	1.24402	En62-64 to En64-73
K5 355	SZ: core to rim	K5_L4C15	Reverse	6	1	1.70688	623.438	13.7713	1.51865	En62-64 to En64-73
K8 500	SZ: core to rim	K8_L9C5	Reverse	2	2	2.10052	767.214	26.4575	1.94602	En62-64 to En64-73
K9 355	SZ: core to rim	K9_L10C4	Reverse	8	4	2.31785	846.596	7.16168	1.75111	En62-64 to En64-73
K9 500	SZ: core to rim	K9_L8C1	Reverse	2	2	2.54103	928.11	30.9452	2.34821	En62-64 to En64-73
K8 500	SZ: core to rim	K8_L6C17	Reverse	6	6	3.55222	1297.45	42.6913	3.27935	En62-64 to En64-73
K8 355	SZ: core to rim	K8_L7C6	Reverse	2	4	3.77767	1379.79	22.2725	3.22985	En62-64 to En64-73

## Sheet: Timescales opx Dacites ME1-ME2
Sample and fraction (µm)	Zonation type	Crystal	Zonation	Distance from rim (µm)	Length (µm)	Timescales (years)	Timescales (days)	σ + (years)	σ - (years)	En change
K6 355	MZ: core to inner rim	K6_L5C23	Normal	6	1	0.0140694	5.13883	0.0400231	0.0104099	En62-64 to En44-54
K6 250	MZ: core to inner rim	K6_L8C18	Normal	8	2	0.0965729	35.2733	0.225032	0.0675736	En62-64 to En44-54
K6 500	MZ: core to inner rim	K6_L5C11	Normal	8	4	0.524157	191.448	4.01668	0.463653	En62-64 to En44-54
K6 125	MZ: core to inner rim	K6_L5C1	Normal	14	4	0.582344	212.701	1.53635	0.422281	En62-64 to En44-54
K6 355	MZ: core to inner rim	K6_L3C7	Normal	6	4	2.18147	796.783	7.031	1.66491	En62-64 to En44-54
K6 125	SZ: core to rim	K6_L6C1	Normal	2	2	0.059929	21.8891	0.161136	0.0436827	En62-64 to En44-54
K6 250	SZ: core to rim	K6_L13C11	Normal	0	6	0.0612404	22.368	0.290775	0.0505863	En62-64 to En44-54
K6 355	SZ: core to rim	K6_L5C8	Normal	0	2	0.062414	22.7967	0.323694	0.0523248	En62-64 to En44-54
K6 125	SZ: core to rim	K6_L5C33	Normal	4	2	0.205912	75.2094	1.18781	0.17549	En62-64 to En44-54
K6 355	SZ: core to rim	K6_L2C12	Normal	0	2	0.275953	100.792	1.12985	0.221785	En62-64 to En44-54
K6 500	SZ: core to rim	K6_L5C7	Normal	2	4	0.321343	117.37	1.9985	0.276831	En62-64 to En44-54
K6 500	SZ: core to rim	K6_L4C12	Normal	0	6	0.942572	344.275	7.51974	0.837584	En62-64 to En44-54
K6 355	SZ: core to rim	K6_L5C21	Normal	0	2	1.39218	508.493	2.28696	0.86538	En62-64 to En44-54
K6 355	SZ: core to rim	K6_L4C16	Normal	0	2	1.53008	558.861	2.53606	0.954313	En62-64 to En44-54
K6 250	SZ: core to rim	K6_L11C12	Normal	0	6	5.09882	1862.35	51.3771	4.63849	En62-64 to En44-54
K6 500	SZ: core to rim	K6_L2C12	Normal	10	14	5.31093	1939.82	47.2613	4.77441	En62-64 to En44-54
